# Supplementary material for: Genome wide association study of frost tolerance in wheat
Source: Sci Rep. 2022 Mar 28;12:5275. doi: 10.1038/s41598-022-08706-y (PMC8960795; doi:10.1038/s41598-022-08706-y)
Supplement: Supplementary file 2 — Supplementary Table S1. [file 41598_2022_8706_MOESM2_ESM.xlsx]

## Sheet: Supplementary Table S1
Supplementary Table S1: 276 genotypes used in this study with information about source, origin and improvement level.
Genotype ID	Source	Country code	improvement level
7017	IC&G SB RAS	RUS	line
7109	IC&G SB RAS	RUS	line
7114	IC&G SB RAS	RUS	line
88-85	HLWWC	RUS	line
88-86	HLWWC	RUS	line
Acciaio	CoreCollection NoviSad via IPK	ITA	cultivar
Ai-bian	CoreCollection NoviSad via IPK	JPN	cultivar
AKTEUR	GSA	GER	cultivar
Al'bina 45	HLWWC	RUS	cultivar
Almari	GSA	PL	cultivar
Ana	CoreCollection NoviSad via IPK	HRV	cultivar
ANKAR		SWE
Antonovka	GSA	BUL	cultivar
APACHE	GSA	FRA	cultivar
Äring II		SWE
ARKTIS	GSA	GER	cultivar
ARLEQUIN		FRA
ATHLON	GSA	GER	cultivar
AURA	NGB	FIN	cultivar
AURELE	GSA	FRA	cultivar
Avalon	CoreCollection NoviSad via IPK	GBR	cultivar
Bagrationovskaya	IC&G SB RAS	RUS	cultivar
BANCO		SWE
Bankut 1205	CoreCollection NoviSad via IPK	HUN	cultivar
Bashkirskaya 10	VIR	RUS	cultivar
Batuta	GSA	PL	cultivar
BCD 1302/83	CoreCollection NoviSad via IPK	MDA	line
Benni multifloret	CoreCollection NoviSad via IPK	USA	cultivar
Bezenchukskaja 380	GSA	RUS	cultivar
Bezenchukskaya 380	VIR	RUS	cultivar
Bezenchukskaya 616	VIR	RUS	cultivar
Bezenchukskaya 790	VIR	RUS	cultivar
Bezostaja 1	NGB	RUS	cultivar
Bezostaja 1	CoreCollection NoviSad via IPK	RUS	cultivar
BEZOSTAYA (1?)	HLWWC	RUS	cultivar
Bezostaya 1	VIR	RUS	cultivar
Biruza	GSA	RUS	cultivar
Biryuza	VIR	RUS	cultivar
Bogatka	GSA	PL	cultivar
BORG	NGB	SWE	cultivar
BR2736d		GER
Brigant	CoreCollection NoviSad via IPK	GBR	cultivar
BRILLIANT	GSA	GER	cultivar
BUENNO	GSA	FRA	cultivar
BULAVA	HLWWC	RUS	cultivar
BULK02R2B	HLWWC	USA	line
Cajeme 71	CoreCollection NoviSad via IPK	MEX	cultivar
Capelle Desprez	CoreCollection NoviSad via IPK	FRA	cultivar
CDC BUTEO	HLWWC	CAN	cultivar
CDC FALCON	HLWWC	CAN	cultivar
Centurk		USA
Cheyenne	NGB	USA	cultivar
Cook	CoreCollection NoviSad via IPK	AUS	cultivar
Crina	GSA	ROM	cultivar
DH01-25-135*R	HLWWC	CAN	DH line
DH01-25-199*R	HLWWC	CAN	DH line
DH01-29-125		CAN
DH01-29-167	HLWWC	CAN	DH line
DH01-29-33*R	HLWWC	CAN	DH line
DH01-32-13	HLWWC	CAN	DH line
DH02-15-54	HLWWC	CAN	DH line
DH02-18-88		CAN
DH99-39-55-5*	HLWWC	CAN	DH line
DH99-55-342-4	HLWWC	CAN	DH line
DISCUS	GSA	GER	cultivar
Doneko	GSA	RUS	cultivar
Donska polupat.	CoreCollection NoviSad via IPK	RUS	cultivar
Durin	CoreCollection NoviSad via IPK	FRA	cultivar
Dzhangal	VIR	RUS	cultivar
Ermak	GSA	RUS	cultivar
Ernie	GSA	USA	cultivar
Ershovskaya 11	VIR	RUS	cultivar
FAMULUS	GSA	GER	cultivar
Favoritka	GSA	RUS	cultivar
FI-400	NGB	KG	cultivar
Filatovka	IC&G SB RAS	RUS	cultivar
Finezja	GSA	PL	cultivar
Flair	GSA	GER	cultivar
Florida	CoreCollection NoviSad via IPK	USA	cultivar
FOLKE		SWE
Goldfield	GSA	USA	cultivar
GSA1	GSA	FRA	line
GSA10	GSA	FRA	line
GSA11		FRA
GSA12	GSA Kursk 2009/10	GER	line
GSA2		n.a
GSA3	GSA	FRA	line
GSA4		FRA
GSA5	GSA	FRA	line
GSA6		FRA
GSA7	GSA	FRA	line
GSA8		FRA
GSA9		FRA
Guberniya	VIR	RUS	cultivar
Hazen		USA
Helios	CoreCollection NoviSad via IPK	USA	cultivar
Holly E	CoreCollection NoviSad via IPK	USA	cultivar
HOLME		SWE
Irkutskaya ozimaya	IC&G SB RAS	RUS	cultivar
ISENGRAIN	GSA	FRA	cultivar
Ivanka	CoreCollection NoviSad via IPK	SRB	cultivar
JULIUS	GSA	GER	cultivar
JYVÄ	NGB	FIN	cultivar
Kalach 60	VIR	RUS	cultivar
Karabalikskaya Osimaya	GSA	KAZ	cultivar
KARABALYKSKAYA 101	HLWWC	KAZ	cultivar
KARABALYKSKAYA OSTISTAYA	HLWWC	KAZ	cultivar
KATYA		KC-BG
Kazanskaya 285	VIR	RUS	cultivar
Kazanskaya 560	VIR	RUS	cultivar
Kirgiskaja 16	GSA	RUS	cultivar
Kirija	GSA	UKR	cultivar
Kobra plus	GSA	PL	cultivar
Kohelia	GSA	PL	cultivar
KOMSOMOLSKAYA 103	HLWWC	KAZ	cultivar
Komsomolskaya 75	GSA	KAZ	cultivar
Korweta	GSA	PL	cultivar
KOSACK		SWE
KP134-3	HLWWC	RUS	line
Kristall	GSA	BUL	cultivar
KRUZHINKA/MV IRMA	HLWWC	UKR	cultivar
Kuibyshevka	VIR	RUS	cultivar
Kulundinka	IC&G SB RAS	RUS	cultivar
L - 1	CoreCollection NoviSad via IPK	HUN	line
L 1/91	CoreCollection NoviSad via IPK	SRB	line
Lambriego Inia	CoreCollection NoviSad via IPK	CHL	cultivar
Legenda	GSA	PL	cultivar
LEIFFER	GSA	GER	cultivar
Levoberezhnaya 1		RUS
Levoberezhnaya 3		RUS
LINNA	NGB	FIN	cultivar
Liona	GSA	UKR	cultivar
LUTESCENS410H39		KAZ
LUTESCENS410H48	HLWWC	KAZ	cultivar
LUTESCENS410H53	HLWWC	KAZ	cultivar
M-31*/Jo3088	IC&G SB RAS	RUS	line
M-31/Cloud	IC&G SB RAS	RUS	line
M-31/Flex	IC&G SB RAS	RUS	line
M-31/Fox	IC&G SB RAS	RUS	line
M-31/Holley	IC&G SB RAS	RUS	line
MAGISTER		GER
Malahit	GSA	RUS	cultivar
Malakhit		RUS
MATRIX	GSA	GER	cultivar
MH.98-16		FRA
Mikon	GSA	GER	cultivar
Min. Dwarf	CoreCollection NoviSad via IPK	AUS	cultivar
Mina	CoreCollection NoviSad via IPK	SRB	cultivar
Mironovska 808	CoreCollection NoviSad via IPK	UKR	cultivar
Mironovskaya 808	HLWWC	UKR	cultivar
Moskovskaja 56	GSA	RUS	cultivar
Moskovskaya 39	GSA	RUS	cultivar
Moskovskaya 40	VIR	RUS	cultivar
Moskovskaya 56	VIR	RUS	cultivar
Mulan	GSA	GER	cultivar
Muszelka	GSA	PL	cultivar
Muza	GSA	PL	cultivar
Naridana	GSA	PL	cultivar
Narobna	GSA	PL	cultivar
Neda	GSA	BUL	cultivar
Nemchinovskaya 24	VIR	RUS	cultivar
Nemchinovskaya 57	VIR	RUS	cultivar
NI98414	HLWWC	USA	line
Nizija	CoreCollection NoviSad via IPK	SRB	cultivar
Norin 10	CoreCollection NoviSad via IPK	JPN	cultivar
Norin 10/Brev.14		USA
Norstar	GSA	USA	cultivar
Nov.Crvena	CoreCollection NoviSad via IPK	SRB	cultivar
Nova banatka	CoreCollection NoviSad via IPK	SRB	cultivar
Novosibirskaya 32	IC&G SB RAS	RUS	cultivar
NS 22/92	CoreCollection NoviSad via IPK	SRB	line
NS 33/90		SRB
NS 46/90	CoreCollection NoviSad via IPK	SRB	line
NS 55-25	CoreCollection NoviSad via IPK	SRB	line
NS 602	CoreCollection NoviSad via IPK	SRB	line
NS 63-24	CoreCollection NoviSad via IPK	SRB	line
NS 66/92	CoreCollection NoviSad via IPK	SRB	line
NS 79/90	CoreCollection NoviSad via IPK	SRB	line
Odesska 267	GSA	UKR	cultivar
PÄRL II	NGB	SWE	cultivar
Peking 11		CHN
PEREGRINE	HLWWC	CAN	line
Pergaja		LTV
Phoenix	CoreCollection NoviSad via IPK	USA	cultivar
PICARD	GSA	FRA	cultivar
PIKO		GER
PKB Krupna	CoreCollection NoviSad via IPK	SRB	cultivar
Pobeda	CoreCollection NoviSad via IPK	SRB	cultivar
Podjaka	GSA	UKR	cultivar
Podoljanka	GSA	UKR	cultivar
Polisska 90	GSA	UKR	cultivar
Povolzhskaya 86	VIR	RUS	cultivar
Powaga	GSA	UKR	cultivar
Purd.39120	CoreCollection NoviSad via IPK	USA	line
Purd.5392		USA
Rannyaya 12	VIR	RUS	cultivar
Red Coat		USA
Renesansa	CoreCollection NoviSad via IPK	SRB	cultivar
RENODLAT SAMMETSVETE	NGB	SWE	cultivar
Resurs	VIR	RUS	cultivar
RIDA	NGB	NOR	cultivar
Ridit	NGB	USA	cultivar
Roma	GSA	PL	cultivar
Roughrider	GSA	USA	cultivar
Rusalka	CoreCollection NoviSad via IPK	BUL	cultivar
Rywalka	GSA	PL	cultivar
S01-249-14*R	HLWWC	CAN	line
S01-249-8*R	HLWWC	CAN	line
S01-285-20*R	HLWWC	CAN	line
S01-285-7*R	HLWWC	CAN	line
S01-31-12	HLWWC	CAN	line
S01-350-6		CAN
S01-360-1	HLWWC	CAN	line
Sailor	GSA	GER	cultivar
Sakura		CZ
Santa	VIR	RUS	cultivar
Saratovskaya 17	VIR	RUS	cultivar
Saratovskaya 90		RUS
Sava	CoreCollection NoviSad via IPK	SRB	cultivar
SAXO		SWE
SD98444/SD97060	HLWWC	USA	line
SD98W302/NW97S186		USA
SERI82	HLWWC	MEX	cultivar
Severodonetskaya Yubileinaya	VIR	RUS	cultivar
Simila	GSA	CZ	cultivar
SKAGEN	GSA	GER	cultivar
Skipetr	GSA	RUS	cultivar
Skorospekla 35	VIR	RUS	cultivar
Slavija		SRB
Slawa	GSA	PL	cultivar
Smuga	GSA	PL	cultivar
Smuglyanka	VIR	RUS	cultivar
Sofija	CoreCollection NoviSad via IPK	SRB	cultivar
ST.ERYHTR 1282-08	HLWWC	UKR	line
ST.ERYHTR 1334-07	HLWWC	UKR	line
STARKE I		SWE
Sukces	GSA	PL	cultivar
Suwon 92	CoreCollection NoviSad via IPK	IND	cultivar
Suzor'e	NGB	BLR	cultivar
Svetoch	VIR	RUS	cultivar
Svilena	GSA	BUL	cultivar
SW MAXI	GSA	GER	cultivar
SW TATAROS	GSA	GER	cultivar
Szegedi 768	CoreCollection NoviSad via IPK	HUN	cultivar
TARSO	GSA	GER	cultivar
TIGER	GSA	GER	cultivar
TJB 990-15	CoreCollection NoviSad via IPK	GBR	line
Tonacja	GSA	PL	cultivar
TRANSIT	GSA	GER	cultivar
Triple Dirk B (GK 12)	CoreCollection NoviSad via IPK	AUS	line
Triple Dirk B (GK 775)	CoreCollection NoviSad via IPK	AUS	line
Tulsa	GSA	GER	cultivar
TÜRKIS	GSA	GER	cultivar
Turnia	GSA	PL	cultivar
Ul'yanovka	IC&G SB RAS	RUS	cultivar
UMKA	HLWWC	RUS	cultivar
Vakka	NGB	FIN	cultivar
Vel	CoreCollection NoviSad via IPK	USA	line
Viktoriya 95	VIR	RUS	cultivar
Volzhskaya K	VIR	RUS	cultivar
Wagrein	n/a	AUT	cultivar
WALDE		na
Wesley/SD97049	HLWWC	USA	line
Wydma	GSA	PL	cultivar
ZAURALSKAYA OZIMAYA	HLWWC	RUS	cultivar
Zemka	VIR	RUS	cultivar
Zentos	GSA	GER	cultivar
ZG 1011		HRV
ZG K 3/82	CoreCollection NoviSad via IPK	HRV	line
ZG K 238/82	CoreCollection NoviSad via IPK	HRV	line
ZG K T 159/82	CoreCollection NoviSad via IPK	HRV	line
Zhemchuzhina Povolzhiya	VIR	RUS	cultivar
Zlatica	GSA	BUL	cultivar
ZOBEL	GSA	GER	cultivar
ZOLOTAVA/DAR ZERNOGRADA	HLWWC	UKR	cultivar
Zvonniza	GSA	RUS	cultivar
n.a: not available
