# Supplementary material for: Genome wide association study of frost tolerance in wheat
Source: Sci Rep. 2022 Mar 28;12:5275. doi: 10.1038/s41598-022-08706-y (PMC8960795; doi:10.1038/s41598-022-08706-y)
Supplement: Supplementary file 3 — Supplementary ﻿Table S2. [file 41598_2022_8706_MOESM3_ESM.xlsx]

## Sheet: SupplementaryTable  S2
Supplementary Table S2: Summary of high and low confidential (HC and LC) genes located within the QTL regions significantly associated (LOD≥4) with frost tolerance (FroT).
Gene type	Chra	Starta	Enda	QTL		is_repr	AHRD-Quality-Code	Blast-Hit-Accession	Human-Readable-Description	Pfam-IDs-(Description)	Interpro-IDs-(Description)	GO-IDs-(Description)-via-Interpro	Gene-or-TE-TE?-U (via-function)
LC	1A	316989869	323989869	QTL_1A	+	1	*-*	tr|Q53QK1|Q53QK1_ORYSJ	Retrotransposon protein, putative, unclassified	PF13456: Reverse transcriptase-like	IPR012337: Ribonuclease H-like domain	GO:0003676 MF: nucleic acid binding	TE
LC	1A	316989869	323989869	QTL_1A	+	1	*-*	tr|Q10I31|Q10I31_ORYSJ	Retrotransposon protein, putative, unclassified		IPR001584: Integrase, catalytic core; IPR012337: Ribonuclease H-like domain	GO:0003676 MF: nucleic acid binding;GO:0015074 BP: DNA integration	TE
LC	1A	316989869	323989869	QTL_1A	+	1	*-*	tr|Q10I31|Q10I31_ORYSJ	Retrotransposon protein, putative, unclassified		IPR001584: Integrase, catalytic core; IPR012337: Ribonuclease H-like domain	GO:0003676 MF: nucleic acid binding;GO:0015074 BP: DNA integration	TE
LC	1A	316989869	323989869	QTL_1A	+	1	*-*	tr|Q2QR96|Q2QR96_ORYSJ	Retrotransposon protein, putative, unclassified	PF10377: Autophagy-related protein 11	IPR019460: Autophagy-related protein 11		TE
HC	1A	316989869	323989869	QTL_1A	+	0	***	tr|M8A4E9|M8A4E9_TRIUA	Trihelix transcription factor GT-2	PF13837: Myb/SANT-like DNA-binding domain	IPR001005: SANT/Myb domain; IPR017877: Myb-like domain		G
HC	1A	316989869	323989869	QTL_1A	+	1	***	tr|M8A4E9|M8A4E9_TRIUA	Trihelix transcription factor GT-2	PF13837: Myb/SANT-like DNA-binding domain	IPR001005: SANT/Myb domain; IPR017877: Myb-like domain		G
LC	1A	316989869	323989869	QTL_1A	-	1	--*	sp|Q8NNP4|DPO4_CORGL	DNA polymerase IV				G
LC	1A	316989869	323989869	QTL_1A	+	1	*-*	tr|Q53PH7|Q53PH7_ORYSJ	Retrotransposon protein, putative, unclassified				TE
LC	1A	316989869	323989869	QTL_1A	+	1	--*	AT5G18880.1	RNA-directed DNA polymerase (reverse transcriptase)-related family protein				TE
LC	1A	316989869	323989869	QTL_1A	-	1	*-*	tr|M7ZXV5|M7ZXV5_TRIUA	Omega-6 fatty acid desaturase, endoplasmic reticulum isozyme 2				G
LC	1A	316989869	323989869	QTL_1A	-	1	--*	AT3G54740.8	zein-binding protein (Protein of unknown function, DUF593)				U
LC	1A	316989869	323989869	QTL_1A	-	1	--*	sp|A4K2W1|SYS1_PONAB	Protein SYS1 homolog				G
LC	1A	316989869	323989869	QTL_1A	-	1	--*	sp|A6VDK0|OPGH_PSEA7	Glucans biosynthesis glucosyltransferase H				G
HC	1A	316989869	323989869	QTL_1A	+	1	***	AT1G64980.2	Nucleotide-diphospho-sugar transferases superfamily protein		IPR029044: Nucleotide-diphospho-sugar transferases		G
HC	1A	316989869	323989869	QTL_1A	-	0	***	tr|A0A1D5RQ83|A0A1D5RQ83_WHEAT	Electron transfer flavoprotein-ubiquinone oxidoreductase, mitochondrial	PF05187: Electron transfer flavoprotein-ubiquinone oxidoreductase, 4Fe-4S	IPR023753: FAD/NAD(P)-binding domain	GO:0016491 MF: oxidoreductase activity;GO:0055114 BP: oxidation-reduction process	G
HC	1A	316989869	323989869	QTL_1A	-	0	***	tr|A0A1D5RQ83|A0A1D5RQ83_WHEAT	Electron transfer flavoprotein-ubiquinone oxidoreductase, mitochondrial	PF05187: Electron transfer flavoprotein-ubiquinone oxidoreductase, 4Fe-4S	IPR023753: FAD/NAD(P)-binding domain	GO:0016491 MF: oxidoreductase activity;GO:0055114 BP: oxidation-reduction process	G
HC	1A	316989869	323989869	QTL_1A	-	0	***	tr|A0A1D5RQ83|A0A1D5RQ83_WHEAT	Electron transfer flavoprotein-ubiquinone oxidoreductase, mitochondrial	PF13450: NAD(P)-binding Rossmann-like domain; PF05187: Electron transfer flavoprotein-ubiquinone oxidoreductase, 4Fe-4S	IPR023753: FAD/NAD(P)-binding domain	GO:0016491 MF: oxidoreductase activity;GO:0055114 BP: oxidation-reduction process	G
HC	1A	316989869	323989869	QTL_1A	-	0	***	tr|A0A1D5RQ83|A0A1D5RQ83_WHEAT	Electron transfer flavoprotein-ubiquinone oxidoreductase, mitochondrial	PF13450: NAD(P)-binding Rossmann-like domain; PF05187: Electron transfer flavoprotein-ubiquinone oxidoreductase, 4Fe-4S	IPR023753: FAD/NAD(P)-binding domain	GO:0016491 MF: oxidoreductase activity;GO:0055114 BP: oxidation-reduction process	G
HC	1A	316989869	323989869	QTL_1A	-	1	***	tr|A0A1D5RQ83|A0A1D5RQ83_WHEAT	Electron transfer flavoprotein-ubiquinone oxidoreductase, mitochondrial	PF13450: NAD(P)-binding Rossmann-like domain; PF05187: Electron transfer flavoprotein-ubiquinone oxidoreductase, 4Fe-4S	IPR023753: FAD/NAD(P)-binding domain	GO:0016491 MF: oxidoreductase activity;GO:0055114 BP: oxidation-reduction process	G
HC	1A	316989869	323989869	QTL_1A	-	1	***	tr|A0A1D5RQ83|A0A1D5RQ83_WHEAT	Electron transfer flavoprotein-ubiquinone oxidoreductase, mitochondrial	PF13450: NAD(P)-binding Rossmann-like domain; PF05187: Electron transfer flavoprotein-ubiquinone oxidoreductase, 4Fe-4S	IPR023753: FAD/NAD(P)-binding domain	GO:0016491 MF: oxidoreductase activity;GO:0055114 BP: oxidation-reduction process	G
LC	1A	316989869	323989869	QTL_1A	-	1	--*	sp|A3M741|QUEF_ACIBT	NADPH-dependent 7-cyano-7-deazaguanine reductase				G
LC	1A	316989869	323989869	QTL_1A	-	1	***	AT2G02520.1	RNA-directed DNA polymerase (reverse transcriptase)-related family protein	PF13966: zinc-binding in reverse transcriptase	IPR026960: Reverse transcriptase zinc-binding domain		TE
LC	1A	316989869	323989869	QTL_1A	-	1	--*	sp|B3PMN7|RL14_MYCA5	50S ribosomal protein L14	PF03372: Endonuclease/Exonuclease/phosphatase family	IPR005135: Endonuclease/exonuclease/phosphatase		TE?
LC	1A	316989869	323989869	QTL_1A	-	1	--*	sp|Q9WC53|GAG_HV1S2	Gag polyprotein		IPR001878: Zinc finger, CCHC-type	GO:0003676 MF: nucleic acid binding;GO:0008270 MF: zinc ion binding	TE
LC	1A	316989869	323989869	QTL_1A	-	1	--*	sp|Q9WC53|GAG_HV1S2	Gag polyprotein		IPR001878: Zinc finger, CCHC-type	GO:0003676 MF: nucleic acid binding;GO:0008270 MF: zinc ion binding	TE
HC	1A	316989869	323989869	QTL_1A	+	1	***	tr|D7LY50|D7LY50_ARALL	Kinase family protein	PF00069: Protein kinase domain	IPR000719: Protein kinase domain; IPR008271: Serine/threonine-protein kinase, active site; IPR011009: Protein kinase-like domain; IPR017441: Protein kinase, ATP binding site	GO:0004672 MF: protein kinase activity;GO:0005524 MF: ATP binding;GO:0006468 BP: protein phosphorylation	G
HC	1A	316989869	323989869	QTL_1A	+	1	***	tr|D7LY50|D7LY50_ARALL	Kinase family protein	PF00069: Protein kinase domain	IPR000719: Protein kinase domain; IPR008271: Serine/threonine-protein kinase, active site; IPR011009: Protein kinase-like domain; IPR017441: Protein kinase, ATP binding site	GO:0004672 MF: protein kinase activity;GO:0005524 MF: ATP binding;GO:0006468 BP: protein phosphorylation	G
HC	1A	316989869	323989869	QTL_1A	+	1	***	tr|D7LY50|D7LY50_ARALL	Kinase family protein	PF00069: Protein kinase domain	IPR000719: Protein kinase domain; IPR008271: Serine/threonine-protein kinase, active site; IPR011009: Protein kinase-like domain; IPR017441: Protein kinase, ATP binding site	GO:0004672 MF: protein kinase activity;GO:0005524 MF: ATP binding;GO:0006468 BP: protein phosphorylation	G
HC	1A	316989869	323989869	QTL_1A	-	1	***	tr|Q9FW91|Q9FW91_ORYSJ	Cytochrome P450 family protein	PF00067: Cytochrome P450	IPR001128: Cytochrome P450; IPR002401: Cytochrome P450, E-class, group I; IPR017972: Cytochrome P450, conserved site	GO:0005506 MF: iron ion binding;GO:0016705 MF: oxidoreductase activity, acting on paired donors, with incorporation or reduction of molecular oxygen;GO:0020037 MF: heme binding;GO:0055114 BP: oxidation-reduction process	G
HC	1A	316989869	323989869	QTL_1A	-	1	***	tr|Q9FW91|Q9FW91_ORYSJ	Cytochrome P450 family protein	PF00067: Cytochrome P450	IPR001128: Cytochrome P450; IPR002401: Cytochrome P450, E-class, group I; IPR017972: Cytochrome P450, conserved site	GO:0005506 MF: iron ion binding;GO:0016705 MF: oxidoreductase activity, acting on paired donors, with incorporation or reduction of molecular oxygen;GO:0020037 MF: heme binding;GO:0055114 BP: oxidation-reduction process	G
HC	1A	316989869	323989869	QTL_1A	-	1	***	tr|Q9FW91|Q9FW91_ORYSJ	Cytochrome P450 family protein	PF00067: Cytochrome P450	IPR001128: Cytochrome P450; IPR002401: Cytochrome P450, E-class, group I; IPR017972: Cytochrome P450, conserved site	GO:0005506 MF: iron ion binding;GO:0016705 MF: oxidoreductase activity, acting on paired donors, with incorporation or reduction of molecular oxygen;GO:0020037 MF: heme binding;GO:0055114 BP: oxidation-reduction process	G
HC	1A	316989869	323989869	QTL_1A	-	1	***	tr|Q9FW91|Q9FW91_ORYSJ	Cytochrome P450 family protein	PF00067: Cytochrome P450	IPR001128: Cytochrome P450; IPR002401: Cytochrome P450, E-class, group I; IPR017972: Cytochrome P450, conserved site	GO:0005506 MF: iron ion binding;GO:0016705 MF: oxidoreductase activity, acting on paired donors, with incorporation or reduction of molecular oxygen;GO:0020037 MF: heme binding;GO:0055114 BP: oxidation-reduction process	G
LC	1A	316989869	323989869	QTL_1A	+	1	--*	tr|A0A1J3C6U6|A0A1J3C6U6_NOCCA	Type I inositol 1,4,5-trisphosphate 5-phosphatase 12				G
LC	1A	316989869	323989869	QTL_1A	+	1	--*	sp|Q64ZA7|NRFA_BACFR	Cytochrome c-552				G
LC	1A	316989869	323989869	QTL_1A	+	1	--*	AT5G37380.9	Chaperone DnaJ-domain superfamily protein				G
HC	1A	316989869	323989869	QTL_1A	-	1	--*	AT4G32070.2	Octicosapeptide/Phox/Bem1p (PB1) domain-containing protein / tetratricopeptide repeat (TPR)-containing protein				G
LC	1A	316989869	323989869	QTL_1A	+	1	--*	sp|Q9BXS6|NUSAP_HUMAN	Nucleolar and spindle-associated protein 1				G
HC	1A	316989869	323989869	QTL_1A	-	1	***	tr|Q9FW91|Q9FW91_ORYSJ	Cytochrome P450 family protein	PF00067: Cytochrome P450	IPR001128: Cytochrome P450; IPR002401: Cytochrome P450, E-class, group I; IPR017972: Cytochrome P450, conserved site	GO:0005506 MF: iron ion binding;GO:0016705 MF: oxidoreductase activity, acting on paired donors, with incorporation or reduction of molecular oxygen;GO:0020037 MF: heme binding;GO:0055114 BP: oxidation-reduction process	G
HC	1A	316989869	323989869	QTL_1A	-	1	***	tr|Q9FW91|Q9FW91_ORYSJ	Cytochrome P450 family protein	PF00067: Cytochrome P450	IPR001128: Cytochrome P450; IPR002401: Cytochrome P450, E-class, group I; IPR017972: Cytochrome P450, conserved site	GO:0005506 MF: iron ion binding;GO:0016705 MF: oxidoreductase activity, acting on paired donors, with incorporation or reduction of molecular oxygen;GO:0020037 MF: heme binding;GO:0055114 BP: oxidation-reduction process	G
HC	1A	316989869	323989869	QTL_1A	-	1	***	tr|Q9FW91|Q9FW91_ORYSJ	Cytochrome P450 family protein	PF00067: Cytochrome P450	IPR001128: Cytochrome P450; IPR002401: Cytochrome P450, E-class, group I; IPR017972: Cytochrome P450, conserved site	GO:0005506 MF: iron ion binding;GO:0016705 MF: oxidoreductase activity, acting on paired donors, with incorporation or reduction of molecular oxygen;GO:0020037 MF: heme binding;GO:0055114 BP: oxidation-reduction process	G
HC	1A	316989869	323989869	QTL_1A	-	1	***	tr|Q9FW91|Q9FW91_ORYSJ	Cytochrome P450 family protein	PF00067: Cytochrome P450	IPR001128: Cytochrome P450; IPR002401: Cytochrome P450, E-class, group I; IPR017972: Cytochrome P450, conserved site	GO:0005506 MF: iron ion binding;GO:0016705 MF: oxidoreductase activity, acting on paired donors, with incorporation or reduction of molecular oxygen;GO:0020037 MF: heme binding;GO:0055114 BP: oxidation-reduction process	G
LC	1A	316989869	323989869	QTL_1A	-	1	***	tr|Q9FW91|Q9FW91_ORYSJ	Cytochrome P450 family protein	PF00067: Cytochrome P450	IPR001128: Cytochrome P450; IPR002401: Cytochrome P450, E-class, group I; IPR017972: Cytochrome P450, conserved site	GO:0005506 MF: iron ion binding;GO:0016705 MF: oxidoreductase activity, acting on paired donors, with incorporation or reduction of molecular oxygen;GO:0020037 MF: heme binding;GO:0055114 BP: oxidation-reduction process	G
LC	1A	316989869	323989869	QTL_1A	-	1	***	tr|Q9FW91|Q9FW91_ORYSJ	Cytochrome P450 family protein	PF00067: Cytochrome P450	IPR001128: Cytochrome P450; IPR002401: Cytochrome P450, E-class, group I; IPR017972: Cytochrome P450, conserved site	GO:0005506 MF: iron ion binding;GO:0016705 MF: oxidoreductase activity, acting on paired donors, with incorporation or reduction of molecular oxygen;GO:0020037 MF: heme binding;GO:0055114 BP: oxidation-reduction process	G
LC	1A	316989869	323989869	QTL_1A	-	1	***	tr|Q9FW91|Q9FW91_ORYSJ	Cytochrome P450 family protein	PF00067: Cytochrome P450	IPR001128: Cytochrome P450; IPR002401: Cytochrome P450, E-class, group I; IPR017972: Cytochrome P450, conserved site	GO:0005506 MF: iron ion binding;GO:0016705 MF: oxidoreductase activity, acting on paired donors, with incorporation or reduction of molecular oxygen;GO:0020037 MF: heme binding;GO:0055114 BP: oxidation-reduction process	G
LC	1A	316989869	323989869	QTL_1A	-	1	***	tr|Q9FW91|Q9FW91_ORYSJ	Cytochrome P450 family protein	PF00067: Cytochrome P450	IPR001128: Cytochrome P450; IPR002401: Cytochrome P450, E-class, group I; IPR017972: Cytochrome P450, conserved site	GO:0005506 MF: iron ion binding;GO:0016705 MF: oxidoreductase activity, acting on paired donors, with incorporation or reduction of molecular oxygen;GO:0020037 MF: heme binding;GO:0055114 BP: oxidation-reduction process	G
HC	1A	316989869	323989869	QTL_1A	-	1	***	tr|A0A1D1XW98|A0A1D1XW98_9ARAE	Protein BPS1, chloroplastic	PF05633: Protein of unknown function (DUF793)	IPR008511: Protein BYPASS-related		G
LC	1A	316989869	323989869	QTL_1A	-	1	*-*	tr|A0A072VJB5|A0A072VJB5_MEDTR	Myb/SANT-like DNA-binding domain protein	PF12776: Myb/SANT-like DNA-binding domain	IPR024752: Myb/SANT-like domain		TE?
LC	1A	316989869	323989869	QTL_1A	+	1	*-*	tr|Q10JY0|Q10JY0_ORYSJ	Retrotransposon protein, putative, unclassified		IPR012337: Ribonuclease H-like domain	GO:0003676 MF: nucleic acid binding	TE
HC	1A	316989869	323989869	QTL_1A	+	1	***	sp|P47865|AQP1_BOVIN	Aquaporin-1	PF00230: Major intrinsic protein	IPR000425: Major intrinsic protein; IPR022357: Major intrinsic protein, conserved site; IPR023271: Aquaporin-like	GO:0005215 MF: transporter activity;GO:0006810 BP: transport;GO:0016020 CC: membrane	G
HC	1A	316989869	323989869	QTL_1A	+	1	***	sp|P47865|AQP1_BOVIN	Aquaporin-1	PF00230: Major intrinsic protein	IPR000425: Major intrinsic protein; IPR022357: Major intrinsic protein, conserved site; IPR023271: Aquaporin-like	GO:0005215 MF: transporter activity;GO:0006810 BP: transport;GO:0016020 CC: membrane	G
HC	1A	316989869	323989869	QTL_1A	+	1	***	sp|P47865|AQP1_BOVIN	Aquaporin-1	PF00230: Major intrinsic protein	IPR000425: Major intrinsic protein; IPR022357: Major intrinsic protein, conserved site; IPR023271: Aquaporin-like	GO:0005215 MF: transporter activity;GO:0006810 BP: transport;GO:0016020 CC: membrane	G
LC	1A	316989869	323989869	QTL_1A	-	1	***	tr|A0A1J3HNP1|A0A1J3HNP1_NOCCA	Glutathione S-transferase T3				G
LC	1A	316989869	323989869	QTL_1A	+	1	*-*	tr|Q60DJ3|Q60DJ3_ORYSJ	Transposon protein, putative, mutator sub-class	PF03108: MuDR family transposase; PF04434: SWIM zinc finger	IPR004332: Transposase, MuDR, plant; IPR006564: Zinc finger, PMZ-type; IPR007527: Zinc finger, SWIM-type	GO:0008270 MF: zinc ion binding	TE
HC	1A	316989869	323989869	QTL_1A	+	1	***	tr|A0A1D5RR26|A0A1D5RR26_WHEAT	Kinesin-like protein	PF00225: Kinesin motor domain; PF13920: Zinc finger, C3HC4 type (RING finger)	IPR001752: Kinesin motor domain; IPR001841: Zinc finger, RING-type; IPR019821: Kinesin motor domain, conserved site; IPR027417: P-loop containing nucleoside triphosphate hydrolase	GO:0003777 MF: microtubule motor activity;GO:0005515 MF: protein binding;GO:0005524 MF: ATP binding;GO:0007018 BP: microtubule-based movement;GO:0008017 MF: microtubule binding;GO:0008270 MF: zinc ion binding	G
HC	1A	316989869	323989869	QTL_1A	+	1	***	tr|A0A1D5RR26|A0A1D5RR26_WHEAT	Kinesin-like protein	PF00225: Kinesin motor domain; PF13920: Zinc finger, C3HC4 type (RING finger)	IPR001752: Kinesin motor domain; IPR001841: Zinc finger, RING-type; IPR019821: Kinesin motor domain, conserved site; IPR027417: P-loop containing nucleoside triphosphate hydrolase	GO:0003777 MF: microtubule motor activity;GO:0005515 MF: protein binding;GO:0005524 MF: ATP binding;GO:0007018 BP: microtubule-based movement;GO:0008017 MF: microtubule binding;GO:0008270 MF: zinc ion binding	G
HC	1A	316989869	323989869	QTL_1A	+	1	***	tr|A0A1D5RR26|A0A1D5RR26_WHEAT	Kinesin-like protein	PF00225: Kinesin motor domain; PF13920: Zinc finger, C3HC4 type (RING finger)	IPR001752: Kinesin motor domain; IPR001841: Zinc finger, RING-type; IPR019821: Kinesin motor domain, conserved site; IPR027417: P-loop containing nucleoside triphosphate hydrolase	GO:0003777 MF: microtubule motor activity;GO:0005515 MF: protein binding;GO:0005524 MF: ATP binding;GO:0007018 BP: microtubule-based movement;GO:0008017 MF: microtubule binding;GO:0008270 MF: zinc ion binding	G
HC	1A	316989869	323989869	QTL_1A	+	1	***	tr|A0A1D5RR26|A0A1D5RR26_WHEAT	Kinesin-like protein	PF00225: Kinesin motor domain; PF13920: Zinc finger, C3HC4 type (RING finger)	IPR001752: Kinesin motor domain; IPR001841: Zinc finger, RING-type; IPR019821: Kinesin motor domain, conserved site; IPR027417: P-loop containing nucleoside triphosphate hydrolase	GO:0003777 MF: microtubule motor activity;GO:0005515 MF: protein binding;GO:0005524 MF: ATP binding;GO:0007018 BP: microtubule-based movement;GO:0008017 MF: microtubule binding;GO:0008270 MF: zinc ion binding	G
HC	1A	316989869	323989869	QTL_1A	+	1	***	tr|A0A1D5RR26|A0A1D5RR26_WHEAT	Kinesin-like protein	PF00225: Kinesin motor domain; PF13920: Zinc finger, C3HC4 type (RING finger)	IPR001752: Kinesin motor domain; IPR001841: Zinc finger, RING-type; IPR019821: Kinesin motor domain, conserved site; IPR027417: P-loop containing nucleoside triphosphate hydrolase	GO:0003777 MF: microtubule motor activity;GO:0005515 MF: protein binding;GO:0005524 MF: ATP binding;GO:0007018 BP: microtubule-based movement;GO:0008017 MF: microtubule binding;GO:0008270 MF: zinc ion binding	G
HC	1A	316989869	323989869	QTL_1A	+	1	***	tr|A0A1D5RR26|A0A1D5RR26_WHEAT	Kinesin-like protein	PF00225: Kinesin motor domain; PF13920: Zinc finger, C3HC4 type (RING finger)	IPR001752: Kinesin motor domain; IPR001841: Zinc finger, RING-type; IPR019821: Kinesin motor domain, conserved site; IPR027417: P-loop containing nucleoside triphosphate hydrolase	GO:0003777 MF: microtubule motor activity;GO:0005515 MF: protein binding;GO:0005524 MF: ATP binding;GO:0007018 BP: microtubule-based movement;GO:0008017 MF: microtubule binding;GO:0008270 MF: zinc ion binding	G
HC	1A	316989869	323989869	QTL_1A	+	0	***	tr|A0A1D5RR25|A0A1D5RR25_WHEAT	Kinesin-like protein	PF00225: Kinesin motor domain	IPR001752: Kinesin motor domain; IPR019821: Kinesin motor domain, conserved site; IPR027417: P-loop containing nucleoside triphosphate hydrolase	GO:0003777 MF: microtubule motor activity;GO:0005524 MF: ATP binding;GO:0007018 BP: microtubule-based movement;GO:0008017 MF: microtubule binding	G
HC	1A	316989869	323989869	QTL_1A	+	0	***	tr|A0A1D5RR25|A0A1D5RR25_WHEAT	Kinesin-like protein	PF00225: Kinesin motor domain	IPR001752: Kinesin motor domain; IPR019821: Kinesin motor domain, conserved site; IPR027417: P-loop containing nucleoside triphosphate hydrolase	GO:0003777 MF: microtubule motor activity;GO:0005524 MF: ATP binding;GO:0007018 BP: microtubule-based movement;GO:0008017 MF: microtubule binding	G
HC	1A	316989869	323989869	QTL_1A	+	0	***	tr|A0A1D5RR25|A0A1D5RR25_WHEAT	Kinesin-like protein	PF00225: Kinesin motor domain	IPR001752: Kinesin motor domain; IPR019821: Kinesin motor domain, conserved site; IPR027417: P-loop containing nucleoside triphosphate hydrolase	GO:0003777 MF: microtubule motor activity;GO:0005524 MF: ATP binding;GO:0007018 BP: microtubule-based movement;GO:0008017 MF: microtubule binding	G
HC	1A	316989869	323989869	QTL_1A	+	0	***	tr|A0A1D5RR25|A0A1D5RR25_WHEAT	Kinesin-like protein	PF00225: Kinesin motor domain	IPR001752: Kinesin motor domain; IPR019821: Kinesin motor domain, conserved site; IPR027417: P-loop containing nucleoside triphosphate hydrolase	GO:0003777 MF: microtubule motor activity;GO:0005524 MF: ATP binding;GO:0007018 BP: microtubule-based movement;GO:0008017 MF: microtubule binding	G
HC	1A	316989869	323989869	QTL_1A	+	0	***	tr|A0A1D5RR26|A0A1D5RR26_WHEAT	Kinesin-like protein	PF00225: Kinesin motor domain; PF13920: Zinc finger, C3HC4 type (RING finger)	IPR001752: Kinesin motor domain; IPR001841: Zinc finger, RING-type; IPR013083: Zinc finger, RING/FYVE/PHD-type; IPR019821: Kinesin motor domain, conserved site; IPR027417: P-loop containing nucleoside triphosphate hydrolase	GO:0003777 MF: microtubule motor activity;GO:0005515 MF: protein binding;GO:0005524 MF: ATP binding;GO:0007018 BP: microtubule-based movement;GO:0008017 MF: microtubule binding;GO:0008270 MF: zinc ion binding	G
HC	1A	316989869	323989869	QTL_1A	+	0	***	tr|A0A1D5RR26|A0A1D5RR26_WHEAT	Kinesin-like protein	PF00225: Kinesin motor domain; PF13920: Zinc finger, C3HC4 type (RING finger)	IPR001752: Kinesin motor domain; IPR001841: Zinc finger, RING-type; IPR013083: Zinc finger, RING/FYVE/PHD-type; IPR019821: Kinesin motor domain, conserved site; IPR027417: P-loop containing nucleoside triphosphate hydrolase	GO:0003777 MF: microtubule motor activity;GO:0005515 MF: protein binding;GO:0005524 MF: ATP binding;GO:0007018 BP: microtubule-based movement;GO:0008017 MF: microtubule binding;GO:0008270 MF: zinc ion binding	G
HC	1A	316989869	323989869	QTL_1A	+	0	***	tr|A0A1D5RR26|A0A1D5RR26_WHEAT	Kinesin-like protein	PF00225: Kinesin motor domain; PF13920: Zinc finger, C3HC4 type (RING finger)	IPR001752: Kinesin motor domain; IPR001841: Zinc finger, RING-type; IPR013083: Zinc finger, RING/FYVE/PHD-type; IPR019821: Kinesin motor domain, conserved site; IPR027417: P-loop containing nucleoside triphosphate hydrolase	GO:0003777 MF: microtubule motor activity;GO:0005515 MF: protein binding;GO:0005524 MF: ATP binding;GO:0007018 BP: microtubule-based movement;GO:0008017 MF: microtubule binding;GO:0008270 MF: zinc ion binding	G
HC	1A	316989869	323989869	QTL_1A	+	0	***	tr|A0A1D5RR26|A0A1D5RR26_WHEAT	Kinesin-like protein	PF00225: Kinesin motor domain; PF13920: Zinc finger, C3HC4 type (RING finger)	IPR001752: Kinesin motor domain; IPR001841: Zinc finger, RING-type; IPR013083: Zinc finger, RING/FYVE/PHD-type; IPR019821: Kinesin motor domain, conserved site; IPR027417: P-loop containing nucleoside triphosphate hydrolase	GO:0003777 MF: microtubule motor activity;GO:0005515 MF: protein binding;GO:0005524 MF: ATP binding;GO:0007018 BP: microtubule-based movement;GO:0008017 MF: microtubule binding;GO:0008270 MF: zinc ion binding	G
HC	1A	316989869	323989869	QTL_1A	+	0	***	tr|A0A1D5RR26|A0A1D5RR26_WHEAT	Kinesin-like protein	PF00225: Kinesin motor domain; PF13920: Zinc finger, C3HC4 type (RING finger)	IPR001752: Kinesin motor domain; IPR001841: Zinc finger, RING-type; IPR013083: Zinc finger, RING/FYVE/PHD-type; IPR019821: Kinesin motor domain, conserved site; IPR027417: P-loop containing nucleoside triphosphate hydrolase	GO:0003777 MF: microtubule motor activity;GO:0005515 MF: protein binding;GO:0005524 MF: ATP binding;GO:0007018 BP: microtubule-based movement;GO:0008017 MF: microtubule binding;GO:0008270 MF: zinc ion binding	G
HC	1A	316989869	323989869	QTL_1A	+	0	***	tr|A0A1D5RR26|A0A1D5RR26_WHEAT	Kinesin-like protein	PF00225: Kinesin motor domain; PF13920: Zinc finger, C3HC4 type (RING finger)	IPR001752: Kinesin motor domain; IPR001841: Zinc finger, RING-type; IPR013083: Zinc finger, RING/FYVE/PHD-type; IPR019821: Kinesin motor domain, conserved site; IPR027417: P-loop containing nucleoside triphosphate hydrolase	GO:0003777 MF: microtubule motor activity;GO:0005515 MF: protein binding;GO:0005524 MF: ATP binding;GO:0007018 BP: microtubule-based movement;GO:0008017 MF: microtubule binding;GO:0008270 MF: zinc ion binding	G
HC	1A	316989869	323989869	QTL_1A	+	0	***	tr|A0A1D5RR26|A0A1D5RR26_WHEAT	Kinesin-like protein	PF00225: Kinesin motor domain; PF13920: Zinc finger, C3HC4 type (RING finger)	IPR001752: Kinesin motor domain; IPR001841: Zinc finger, RING-type; IPR019821: Kinesin motor domain, conserved site; IPR027417: P-loop containing nucleoside triphosphate hydrolase	GO:0003777 MF: microtubule motor activity;GO:0005515 MF: protein binding;GO:0005524 MF: ATP binding;GO:0007018 BP: microtubule-based movement;GO:0008017 MF: microtubule binding;GO:0008270 MF: zinc ion binding	G
HC	1A	316989869	323989869	QTL_1A	+	0	***	tr|A0A1D5RR26|A0A1D5RR26_WHEAT	Kinesin-like protein	PF00225: Kinesin motor domain; PF13920: Zinc finger, C3HC4 type (RING finger)	IPR001752: Kinesin motor domain; IPR001841: Zinc finger, RING-type; IPR019821: Kinesin motor domain, conserved site; IPR027417: P-loop containing nucleoside triphosphate hydrolase	GO:0003777 MF: microtubule motor activity;GO:0005515 MF: protein binding;GO:0005524 MF: ATP binding;GO:0007018 BP: microtubule-based movement;GO:0008017 MF: microtubule binding;GO:0008270 MF: zinc ion binding	G
HC	1A	316989869	323989869	QTL_1A	+	0	***	tr|A0A1D5RR26|A0A1D5RR26_WHEAT	Kinesin-like protein	PF00225: Kinesin motor domain; PF13920: Zinc finger, C3HC4 type (RING finger)	IPR001752: Kinesin motor domain; IPR001841: Zinc finger, RING-type; IPR019821: Kinesin motor domain, conserved site; IPR027417: P-loop containing nucleoside triphosphate hydrolase	GO:0003777 MF: microtubule motor activity;GO:0005515 MF: protein binding;GO:0005524 MF: ATP binding;GO:0007018 BP: microtubule-based movement;GO:0008017 MF: microtubule binding;GO:0008270 MF: zinc ion binding	G
HC	1A	316989869	323989869	QTL_1A	+	0	***	tr|A0A1D5RR26|A0A1D5RR26_WHEAT	Kinesin-like protein	PF00225: Kinesin motor domain; PF13920: Zinc finger, C3HC4 type (RING finger)	IPR001752: Kinesin motor domain; IPR001841: Zinc finger, RING-type; IPR019821: Kinesin motor domain, conserved site; IPR027417: P-loop containing nucleoside triphosphate hydrolase	GO:0003777 MF: microtubule motor activity;GO:0005515 MF: protein binding;GO:0005524 MF: ATP binding;GO:0007018 BP: microtubule-based movement;GO:0008017 MF: microtubule binding;GO:0008270 MF: zinc ion binding	G
HC	1A	316989869	323989869	QTL_1A	+	0	***	tr|A0A1D5RR26|A0A1D5RR26_WHEAT	Kinesin-like protein	PF00225: Kinesin motor domain; PF13920: Zinc finger, C3HC4 type (RING finger)	IPR001752: Kinesin motor domain; IPR001841: Zinc finger, RING-type; IPR019821: Kinesin motor domain, conserved site; IPR027417: P-loop containing nucleoside triphosphate hydrolase	GO:0003777 MF: microtubule motor activity;GO:0005515 MF: protein binding;GO:0005524 MF: ATP binding;GO:0007018 BP: microtubule-based movement;GO:0008017 MF: microtubule binding;GO:0008270 MF: zinc ion binding	G
HC	1A	316989869	323989869	QTL_1A	+	0	***	tr|A0A1D5RR26|A0A1D5RR26_WHEAT	Kinesin-like protein	PF00225: Kinesin motor domain; PF13920: Zinc finger, C3HC4 type (RING finger)	IPR001752: Kinesin motor domain; IPR001841: Zinc finger, RING-type; IPR019821: Kinesin motor domain, conserved site; IPR027417: P-loop containing nucleoside triphosphate hydrolase	GO:0003777 MF: microtubule motor activity;GO:0005515 MF: protein binding;GO:0005524 MF: ATP binding;GO:0007018 BP: microtubule-based movement;GO:0008017 MF: microtubule binding;GO:0008270 MF: zinc ion binding	G
LC	1A	316989869	323989869	QTL_1A	+	1	***	tr|A0A072VES6|A0A072VES6_MEDTR	Endonuclease/exonuclease/phosphatase family protein		IPR005135: Endonuclease/exonuclease/phosphatase		TE?
LC	1A	316989869	323989869	QTL_1A	-	1	*-*	tr|Q2VEY8|Q2VEY8_PENAM	Transposase	PF13359: DDE superfamily endonuclease	IPR027806: Harbinger transposase-derived nuclease domain		TE
LC	1A	316989869	323989869	QTL_1A	-	1	--*	AT4G18360.4	Aldolase-type TIM barrel family protein				G
LC	1A	316989869	323989869	QTL_1A	+	1	-**	AT2G13980.1	Polynucleotidyl transferase, ribonuclease H-like superfamily protein	PF13456: Reverse transcriptase-like	IPR012337: Ribonuclease H-like domain	GO:0003676 MF: nucleic acid binding	TE
HC	1A	316989869	323989869	QTL_1A	+	1	***	tr|B9MUF1|B9MUF1_POPTR	SH3 domain-containing protein 1	PF14604: Variant SH3 domain	IPR001452: SH3 domain; IPR027267: Arfaptin homology (AH) domain/BAR domain	GO:0005515 MF: protein binding	G
LC	1A	316989869	323989869	QTL_1A	+	1	--*	tr|F4JNR2|F4JNR2_ARATH	CRS1 / YhbY (CRM) domain-containing protein	PF01985: CRS1 / YhbY (CRM) domain	IPR001890: RNA-binding, CRM domain	GO:0003723 MF: RNA binding	G
LC	1A	316989869	323989869	QTL_1A	+	1	***	AT2G02520.1	RNA-directed DNA polymerase (reverse transcriptase)-related family protein	PF13966: zinc-binding in reverse transcriptase	IPR026960: Reverse transcriptase zinc-binding domain		TE
LC	1A	316989869	323989869	QTL_1A	-	1	--*	tr|A2Q137|A2Q137_MEDTR	RNA-directed DNA polymerase (Reverse transcriptase)	PF13966: zinc-binding in reverse transcriptase	IPR026960: Reverse transcriptase zinc-binding domain		TE
LC	1A	316989869	323989869	QTL_1A	+	1	--*	sp|P33056|ETF1_VAR67	Early transcription factor 70 kDa subunit				G
HC	1A	316989869	323989869	QTL_1A	+	1	***	tr|B9MXJ3|B9MXJ3_POPTR	Cytochrome P450 family protein	PF00067: Cytochrome P450	IPR001128: Cytochrome P450; IPR002401: Cytochrome P450, E-class, group I; IPR017972: Cytochrome P450, conserved site	GO:0005506 MF: iron ion binding;GO:0016705 MF: oxidoreductase activity, acting on paired donors, with incorporation or reduction of molecular oxygen;GO:0020037 MF: heme binding;GO:0055114 BP: oxidation-reduction process	G
HC	1A	316989869	323989869	QTL_1A	+	1	***	tr|B9MXJ3|B9MXJ3_POPTR	Cytochrome P450 family protein	PF00067: Cytochrome P450	IPR001128: Cytochrome P450; IPR002401: Cytochrome P450, E-class, group I; IPR017972: Cytochrome P450, conserved site	GO:0005506 MF: iron ion binding;GO:0016705 MF: oxidoreductase activity, acting on paired donors, with incorporation or reduction of molecular oxygen;GO:0020037 MF: heme binding;GO:0055114 BP: oxidation-reduction process	G
HC	1A	316989869	323989869	QTL_1A	+	1	***	tr|B9MXJ3|B9MXJ3_POPTR	Cytochrome P450 family protein	PF00067: Cytochrome P450	IPR001128: Cytochrome P450; IPR002401: Cytochrome P450, E-class, group I; IPR017972: Cytochrome P450, conserved site	GO:0005506 MF: iron ion binding;GO:0016705 MF: oxidoreductase activity, acting on paired donors, with incorporation or reduction of molecular oxygen;GO:0020037 MF: heme binding;GO:0055114 BP: oxidation-reduction process	G
HC	1A	316989869	323989869	QTL_1A	+	1	***	tr|B9MXJ3|B9MXJ3_POPTR	Cytochrome P450 family protein	PF00067: Cytochrome P450	IPR001128: Cytochrome P450; IPR002401: Cytochrome P450, E-class, group I; IPR017972: Cytochrome P450, conserved site	GO:0005506 MF: iron ion binding;GO:0016705 MF: oxidoreductase activity, acting on paired donors, with incorporation or reduction of molecular oxygen;GO:0020037 MF: heme binding;GO:0055114 BP: oxidation-reduction process	G
LC	1A	316989869	323989869	QTL_1A	+	1	--*	tr|A0A1J3D5S2|A0A1J3D5S2_NOCCA	E3 ubiquitin-protein ligase RING1-like	PF13456: Reverse transcriptase-like	IPR012337: Ribonuclease H-like domain	GO:0003676 MF: nucleic acid binding	TE?
LC	1A	316989869	323989869	QTL_1A	-	1	*-*	tr|Q2QVI6|Q2QVI6_ORYSJ	Transposon protein, putative, Pong sub-class	PF04827: Plant transposon protein	IPR006912: Harbinger transposase-derived protein	GO:0016788 MF: hydrolase activity, acting on ester bonds	TE
HC	1A	316989869	323989869	QTL_1A	+	1	--*	tr|A0A0G4AP14|A0A0G4AP14_9ROSI	AT1G17665-like protein				G
LC	1A	316989869	323989869	QTL_1A	-	1	*-*	tr|Q10IA6|Q10IA6_ORYSJ	Retrotransposon protein, putative, unclassified	PF13966: zinc-binding in reverse transcriptase	IPR026960: Reverse transcriptase zinc-binding domain		TE
LC	1A	316989869	323989869	QTL_1A	-	1	*-*	tr|A0A0B2R0Q2|A0A0B2R0Q2_GLYSO	LINE-1 reverse transcriptase like		IPR005135: Endonuclease/exonuclease/phosphatase		TE
LC	1A	316989869	323989869	QTL_1A	-	1	***	AT4G09660.1	zinc finger MYM-type-like protein	PF14291: Domain of unknown function (DUF4371); PF05699: hAT family C-terminal dimerisation region	IPR006580: Zinc finger, TTF-type; IPR008906: HAT, C-terminal dimerisation domain; IPR012337: Ribonuclease H-like domain; IPR025398: Domain of unknown function DUF4371	GO:0003676 MF: nucleic acid binding;GO:0046983 MF: protein dimerization activity	TE
LC	1A	316989869	323989869	QTL_1A	-	1	***	AT4G09660.1	zinc finger MYM-type-like protein	PF14291: Domain of unknown function (DUF4371); PF05699: hAT family C-terminal dimerisation region	IPR006580: Zinc finger, TTF-type; IPR008906: HAT, C-terminal dimerisation domain; IPR012337: Ribonuclease H-like domain; IPR025398: Domain of unknown function DUF4371	GO:0003676 MF: nucleic acid binding;GO:0046983 MF: protein dimerization activity	TE
HC	1A	316989869	323989869	QTL_1A	+	1	***	tr|A0A1E5UTG5|A0A1E5UTG5_9POAL	Transmembrane and coiled-coil domain-containing protein 4	PF05277: Protein of unknown function (DUF726)	IPR007941: Protein of unknown function DUF726; IPR029058: Alpha/Beta hydrolase fold		G
HC	1A	316989869	323989869	QTL_1A	-	1	*-*	tr|G7J7T1|G7J7T1_MEDTR	Zinc finger CCCH domain protein	PF02201: SWIB/MDM2 domain; PF03126: Plus-3 domain; PF02213: GYF domain	IPR000571: Zinc finger, CCCH-type; IPR001965: Zinc finger, PHD-type; IPR003121: SWIB/MDM2 domain; IPR003169: GYF domain; IPR004343: Plus-3 domain; IPR011011: Zinc finger, FYVE/PHD-type; IPR013083: Zinc finger, RING/FYVE/PHD-type; IPR019786: Zinc finger, PHD-type, conserved site; IPR019787: Zinc finger, PHD-finger; IPR019835: SWIB domain	GO:0003677 MF: DNA binding;GO:0005515 MF: protein binding;GO:0008270 MF: zinc ion binding;GO:0046872 MF: metal ion binding	TE?
HC	1A	316989869	323989869	QTL_1A	-	1	*-*	tr|G7J7T1|G7J7T1_MEDTR	Zinc finger CCCH domain protein	PF02201: SWIB/MDM2 domain; PF03126: Plus-3 domain; PF02213: GYF domain	IPR000571: Zinc finger, CCCH-type; IPR001965: Zinc finger, PHD-type; IPR003121: SWIB/MDM2 domain; IPR003169: GYF domain; IPR004343: Plus-3 domain; IPR011011: Zinc finger, FYVE/PHD-type; IPR013083: Zinc finger, RING/FYVE/PHD-type; IPR019786: Zinc finger, PHD-type, conserved site; IPR019787: Zinc finger, PHD-finger; IPR019835: SWIB domain	GO:0003677 MF: DNA binding;GO:0005515 MF: protein binding;GO:0008270 MF: zinc ion binding;GO:0046872 MF: metal ion binding	TE?
HC	1A	316989869	323989869	QTL_1A	-	1	*-*	tr|G7J7T1|G7J7T1_MEDTR	Zinc finger CCCH domain protein	PF02201: SWIB/MDM2 domain; PF03126: Plus-3 domain; PF02213: GYF domain	IPR000571: Zinc finger, CCCH-type; IPR001965: Zinc finger, PHD-type; IPR003121: SWIB/MDM2 domain; IPR003169: GYF domain; IPR004343: Plus-3 domain; IPR011011: Zinc finger, FYVE/PHD-type; IPR013083: Zinc finger, RING/FYVE/PHD-type; IPR019786: Zinc finger, PHD-type, conserved site; IPR019787: Zinc finger, PHD-finger; IPR019835: SWIB domain	GO:0003677 MF: DNA binding;GO:0005515 MF: protein binding;GO:0008270 MF: zinc ion binding;GO:0046872 MF: metal ion binding	TE?
HC	1A	316989869	323989869	QTL_1A	-	1	*-*	tr|G7J7T1|G7J7T1_MEDTR	Zinc finger CCCH domain protein	PF02201: SWIB/MDM2 domain; PF03126: Plus-3 domain; PF02213: GYF domain	IPR000571: Zinc finger, CCCH-type; IPR001965: Zinc finger, PHD-type; IPR003121: SWIB/MDM2 domain; IPR003169: GYF domain; IPR004343: Plus-3 domain; IPR011011: Zinc finger, FYVE/PHD-type; IPR013083: Zinc finger, RING/FYVE/PHD-type; IPR019786: Zinc finger, PHD-type, conserved site; IPR019787: Zinc finger, PHD-finger; IPR019835: SWIB domain	GO:0003677 MF: DNA binding;GO:0005515 MF: protein binding;GO:0008270 MF: zinc ion binding;GO:0046872 MF: metal ion binding	TE?
LC	1A	316989869	323989869	QTL_1A	+	1	*-*	tr|A0A151RSW7|A0A151RSW7_CAJCA	Transposon Ty3-G Gag-Pol polyprotein	PF00385: Chromo (CHRromatin Organisation MOdifier) domain	IPR016197: Chromo domain-like; IPR023780: Chromo domain		TE
LC	1A	316989869	323989869	QTL_1A	+	1	--*	AT4G33910.1	2-oxoglutarate (2OG) and Fe(II)-dependent oxygenase superfamily protein				G
LC	1A	316989869	323989869	QTL_1A	+	1	*-*	tr|Q8H0A5|Q8H0A5_ORYSJ	Retrotransposon protein, putative, unclassified				TE
LC	1A	316989869	323989869	QTL_1A	+	1	*-*	tr|A0A151T956|A0A151T956_CAJCA	Transposon TX1 uncharacterized	PF00078: Reverse transcriptase (RNA-dependent DNA polymerase)	IPR000477: Reverse transcriptase domain		TE
LC	1A	316989869	323989869	QTL_1A	+	1	*-*	tr|Q2HS45|Q2HS45_MEDTR	RNA-directed DNA polymerase (Reverse transcriptase)				TE
HC	1A	316989869	323989869	QTL_1A	-	0	***	tr|A0A0K9PIU0|A0A0K9PIU0_ZOSMR	Serine carboxypeptidase S28 family protein	PF05577: Serine carboxypeptidase S28	IPR008758: Peptidase S28; IPR029058: Alpha/Beta hydrolase fold	GO:0006508 BP: proteolysis;GO:0008236 MF: serine-type peptidase activity	G
HC	1A	316989869	323989869	QTL_1A	-	0	***	tr|A0A0K9PIU0|A0A0K9PIU0_ZOSMR	Serine carboxypeptidase S28 family protein	PF05577: Serine carboxypeptidase S28	IPR008758: Peptidase S28; IPR029058: Alpha/Beta hydrolase fold	GO:0006508 BP: proteolysis;GO:0008236 MF: serine-type peptidase activity	G
HC	1A	316989869	323989869	QTL_1A	-	1	***	tr|A0A0K9PIU0|A0A0K9PIU0_ZOSMR	Serine carboxypeptidase S28 family protein	PF05577: Serine carboxypeptidase S28	IPR008758: Peptidase S28; IPR029058: Alpha/Beta hydrolase fold	GO:0006508 BP: proteolysis;GO:0008236 MF: serine-type peptidase activity	G
HC	1A	316989869	323989869	QTL_1A	-	1	***	tr|A0A0K9PIU0|A0A0K9PIU0_ZOSMR	Serine carboxypeptidase S28 family protein	PF05577: Serine carboxypeptidase S28	IPR008758: Peptidase S28; IPR029058: Alpha/Beta hydrolase fold	GO:0006508 BP: proteolysis;GO:0008236 MF: serine-type peptidase activity	G
HC	1A	316989869	323989869	QTL_1A	-	0	*-*	tr|A0A0B2NX53|A0A0B2NX53_GLYSO	Lysosomal Pro-X carboxypeptidase	PF05577: Serine carboxypeptidase S28	IPR008758: Peptidase S28; IPR029058: Alpha/Beta hydrolase fold	GO:0006508 BP: proteolysis;GO:0008236 MF: serine-type peptidase activity	G
HC	1A	316989869	323989869	QTL_1A	-	0	*-*	tr|A0A0B2NX53|A0A0B2NX53_GLYSO	Lysosomal Pro-X carboxypeptidase	PF05577: Serine carboxypeptidase S28	IPR008758: Peptidase S28; IPR029058: Alpha/Beta hydrolase fold	GO:0006508 BP: proteolysis;GO:0008236 MF: serine-type peptidase activity	G
HC	1A	316989869	323989869	QTL_1A	-	1	***	tr|A0A0K9PIU0|A0A0K9PIU0_ZOSMR	Serine carboxypeptidase S28 family protein	PF05577: Serine carboxypeptidase S28	IPR008758: Peptidase S28; IPR029058: Alpha/Beta hydrolase fold	GO:0006508 BP: proteolysis;GO:0008236 MF: serine-type peptidase activity	G
HC	1A	316989869	323989869	QTL_1A	-	1	***	tr|A0A0K9PIU0|A0A0K9PIU0_ZOSMR	Serine carboxypeptidase S28 family protein	PF05577: Serine carboxypeptidase S28	IPR008758: Peptidase S28; IPR029058: Alpha/Beta hydrolase fold	GO:0006508 BP: proteolysis;GO:0008236 MF: serine-type peptidase activity	G
LC	1A	316989869	323989869	QTL_1A	+	1	--*	AT4G27860.4	vacuolar iron transporter (VIT) family protein				G
HC	1A	316989869	323989869	QTL_1A	+	1	*-*	AT5G21222.4	protein kinase family protein	PF00069: Protein kinase domain	IPR000719: Protein kinase domain; IPR008271: Serine/threonine-protein kinase, active site; IPR011009: Protein kinase-like domain; IPR011992: EF-hand domain pair; IPR017441: Protein kinase, ATP binding site	GO:0004672 MF: protein kinase activity;GO:0005524 MF: ATP binding;GO:0006468 BP: protein phosphorylation	G
HC	1A	316989869	323989869	QTL_1A	+	1	*-*	AT5G21222.4	protein kinase family protein	PF00069: Protein kinase domain	IPR000719: Protein kinase domain; IPR008271: Serine/threonine-protein kinase, active site; IPR011009: Protein kinase-like domain; IPR011992: EF-hand domain pair; IPR017441: Protein kinase, ATP binding site	GO:0004672 MF: protein kinase activity;GO:0005524 MF: ATP binding;GO:0006468 BP: protein phosphorylation	G
HC	1A	316989869	323989869	QTL_1A	+	1	*-*	AT5G21222.4	protein kinase family protein	PF00069: Protein kinase domain	IPR000719: Protein kinase domain; IPR008271: Serine/threonine-protein kinase, active site; IPR011009: Protein kinase-like domain; IPR011992: EF-hand domain pair; IPR017441: Protein kinase, ATP binding site	GO:0004672 MF: protein kinase activity;GO:0005524 MF: ATP binding;GO:0006468 BP: protein phosphorylation	G
LC	1A	316989869	323989869	QTL_1A	-	1	*-*	tr|Q2QV25|Q2QV25_ORYSJ	Retrotransposon protein, putative, unclassified	PF04195: Putative gypsy type transposon	IPR007321: Transposase (putative), gypsy type		TE
LC	1A	316989869	323989869	QTL_1A	+	1	*-*	tr|Q10IA6|Q10IA6_ORYSJ	Retrotransposon protein, putative, unclassified	PF14111: Domain of unknown function (DUF4283); PF14392: Zinc knuckle	IPR001878: Zinc finger, CCHC-type; IPR025558: Domain of unknown function DUF4283; IPR025836: Zinc knuckle CX2CX4HX4C	GO:0003676 MF: nucleic acid binding;GO:0008270 MF: zinc ion binding	TE
LC	1A	316989869	323989869	QTL_1A	+	1	*-*	tr|Q10IA6|Q10IA6_ORYSJ	Retrotransposon protein, putative, unclassified	PF14111: Domain of unknown function (DUF4283); PF14392: Zinc knuckle	IPR001878: Zinc finger, CCHC-type; IPR025558: Domain of unknown function DUF4283; IPR025836: Zinc knuckle CX2CX4HX4C	GO:0003676 MF: nucleic acid binding;GO:0008270 MF: zinc ion binding	TE
LC	1A	316989869	323989869	QTL_1A	+	1	*-*	tr|A0A151TBK2|A0A151TBK2_CAJCA	Retrovirus-related Pol polyprotein LINE-1	PF00078: Reverse transcriptase (RNA-dependent DNA polymerase)	IPR000477: Reverse transcriptase domain		TE
LC	1A	316989869	323989869	QTL_1A	+	1	*-*	tr|A2Q338|A2Q338_MEDTR	RNA-directed DNA polymerase (Reverse transcriptase)				TE
HC	1A	316989869	323989869	QTL_1A	+	1	***	tr|A0A072VDQ3|A0A072VDQ3_MEDTR	DUF241 domain protein	PF03087: Arabidopsis protein of unknown function	IPR004320: Protein of unknown function DUF241, plant		G
HC	1A	316989869	323989869	QTL_1A	-	1	***	tr|A0A1E5UW92|A0A1E5UW92_9POAL	Protein ROOT PRIMORDIUM DEFECTIVE 1	PF11955: Plant organelle RNA recognition domain	IPR021099: Plant organelle RNA recognition domain		G
HC	1A	316989869	323989869	QTL_1A	-	1	***	tr|A0A0K9PGR6|A0A0K9PGR6_ZOSMR	SAUR-like auxin-responsive protein family	PF02519: Auxin responsive protein	IPR003676: Small auxin-up RNA	GO:0009733 BP: response to auxin	G
LC	1A	316989869	323989869	QTL_1A	-	1	-**	tr|B3H5G2|B3H5G2_ARATH	Conserved peptide upstream open reading frame 50				G
HC	1A	316989869	323989869	QTL_1A	-	1	***	AT1G76240.1	DUF241 domain protein (DUF241)	PF03087: Arabidopsis protein of unknown function	IPR004320: Protein of unknown function DUF241, plant		G
HC	1A	316989869	323989869	QTL_1A	-	1	--*	AT4G36470.1	S-adenosyl-L-methionine-dependent methyltransferases superfamily protein				G
LC	1A	316989869	323989869	QTL_1A	-	1	*-*	tr|A0A1J3DW54|A0A1J3DW54_NOCCA	ATP-dependent DNA helicase pif1	PF14214: Helitron helicase-like domain at N-terminus; PF05970: PIF1-like helicase	IPR010285: DNA helicase Pif1-like; IPR025476: Helitron helicase-like domain; IPR027417: P-loop containing nucleoside triphosphate hydrolase	GO:0000723 BP: telomere maintenance;GO:0003678 MF: DNA helicase activity;GO:0006281 BP: DNA repair	TE
LC	1A	316989869	323989869	QTL_1A	-	1	*-*	tr|A0A1J3DW54|A0A1J3DW54_NOCCA	ATP-dependent DNA helicase pif1	PF14214: Helitron helicase-like domain at N-terminus; PF05970: PIF1-like helicase	IPR010285: DNA helicase Pif1-like; IPR025476: Helitron helicase-like domain; IPR027417: P-loop containing nucleoside triphosphate hydrolase	GO:0000723 BP: telomere maintenance;GO:0003678 MF: DNA helicase activity;GO:0006281 BP: DNA repair	TE
LC	1A	316989869	323989869	QTL_1A	-	1	*-*	tr|A0A1J3DW54|A0A1J3DW54_NOCCA	ATP-dependent DNA helicase pif1	PF14214: Helitron helicase-like domain at N-terminus; PF05970: PIF1-like helicase	IPR010285: DNA helicase Pif1-like; IPR025476: Helitron helicase-like domain; IPR027417: P-loop containing nucleoside triphosphate hydrolase	GO:0000723 BP: telomere maintenance;GO:0003678 MF: DNA helicase activity;GO:0006281 BP: DNA repair	TE
HC	1A	316989869	323989869	QTL_1A	-	0	***	tr|A0A067YNJ5|A0A067YNJ5_WHEAT	Actin	PF00022: Actin	IPR004000: Actin family; IPR004001: Actin, conserved site; IPR020902: Actin/actin-like conserved site		G
HC	1A	316989869	323989869	QTL_1A	-	1	***	tr|A0A1B3IJS2|A0A1B3IJS2_ELEIN	Actin	PF00022: Actin	IPR004000: Actin family; IPR004001: Actin, conserved site; IPR020902: Actin/actin-like conserved site		G
LC	1A	316989869	323989869	QTL_1A	+	1	--*	AT1G12700.3	RNA processing FACTOR				G
HC	1A	316989869	323989869	QTL_1A	-	1	--*	sp|O51291|NADK_BORBU	NAD kinase				G
HC	1A	316989869	323989869	QTL_1A	+	1			Unknown protein				U
HC	1A	316989869	323989869	QTL_1A	+	1	--*	sp|B1WAS2|HUNK_XENTR	Hormonally up-regulated neu tumor-associated kinase homolog				G
LC	1A	316989869	323989869	QTL_1A	-	1	--*	sp|Q4ZMN7|RPOB_PSEU2	DNA-directed RNA polymerase subunit beta				G
LC	1A	316989869	323989869	QTL_1A	-	1	-**	AT3G24255.3	RNA-directed DNA polymerase (reverse transcriptase)-related family protein	PF13966: zinc-binding in reverse transcriptase	IPR026960: Reverse transcriptase zinc-binding domain		TE
HC	1B	333147904	340147904	QTL_1B_1	-	1	***	tr|W9RXN6|W9RXN6_9ROSA	Protochlorophyllide reductase	PF00106: short chain dehydrogenase	IPR002347: Short-chain dehydrogenase/reductase SDR; IPR005979: Light-dependent protochlorophyllide reductase; IPR016040: NAD(P)-binding domain	GO:0016630 MF: protochlorophyllide reductase activity;GO:0055114 BP: oxidation-reduction process	G
HC	1B	333147904	340147904	QTL_1B_1	-	1	***	tr|W9RXN6|W9RXN6_9ROSA	Protochlorophyllide reductase	PF00106: short chain dehydrogenase	IPR002347: Short-chain dehydrogenase/reductase SDR; IPR005979: Light-dependent protochlorophyllide reductase; IPR016040: NAD(P)-binding domain	GO:0016630 MF: protochlorophyllide reductase activity;GO:0055114 BP: oxidation-reduction process	G
HC	1B	333147904	340147904	QTL_1B_1	+	1	***	tr|B9SXB7|B9SXB7_RICCO	Prolyl 4-hydroxylase alpha subunit, putative	PF13640: 2OG-Fe(II) oxygenase superfamily	IPR005123: Oxoglutarate/iron-dependent dioxygenase; IPR006620: Prolyl 4-hydroxylase, alpha subunit	GO:0005506 MF: iron ion binding;GO:0016491 MF: oxidoreductase activity;GO:0016705 MF: oxidoreductase activity, acting on paired donors, with incorporation or reduction of molecular oxygen;GO:0031418 MF: L-ascorbic acid binding;GO:0055114 BP: oxidation-reduction process	G
HC	1B	333147904	340147904	QTL_1B_1	+	1	***	tr|B9SXB7|B9SXB7_RICCO	Prolyl 4-hydroxylase alpha subunit, putative	PF13640: 2OG-Fe(II) oxygenase superfamily	IPR005123: Oxoglutarate/iron-dependent dioxygenase; IPR006620: Prolyl 4-hydroxylase, alpha subunit	GO:0005506 MF: iron ion binding;GO:0016491 MF: oxidoreductase activity;GO:0016705 MF: oxidoreductase activity, acting on paired donors, with incorporation or reduction of molecular oxygen;GO:0031418 MF: L-ascorbic acid binding;GO:0055114 BP: oxidation-reduction process	G
HC	1B	333147904	340147904	QTL_1B_1	+	1	***	tr|B9SXB7|B9SXB7_RICCO	Prolyl 4-hydroxylase alpha subunit, putative	PF13640: 2OG-Fe(II) oxygenase superfamily	IPR005123: Oxoglutarate/iron-dependent dioxygenase; IPR006620: Prolyl 4-hydroxylase, alpha subunit	GO:0005506 MF: iron ion binding;GO:0016491 MF: oxidoreductase activity;GO:0016705 MF: oxidoreductase activity, acting on paired donors, with incorporation or reduction of molecular oxygen;GO:0031418 MF: L-ascorbic acid binding;GO:0055114 BP: oxidation-reduction process	G
HC	1B	333147904	340147904	QTL_1B_1	+	1	***	tr|B9SXB7|B9SXB7_RICCO	Prolyl 4-hydroxylase alpha subunit, putative	PF13640: 2OG-Fe(II) oxygenase superfamily	IPR005123: Oxoglutarate/iron-dependent dioxygenase; IPR006620: Prolyl 4-hydroxylase, alpha subunit	GO:0005506 MF: iron ion binding;GO:0016491 MF: oxidoreductase activity;GO:0016705 MF: oxidoreductase activity, acting on paired donors, with incorporation or reduction of molecular oxygen;GO:0031418 MF: L-ascorbic acid binding;GO:0055114 BP: oxidation-reduction process	G
HC	1B	333147904	340147904	QTL_1B_1	+	1	***	tr|B9SXB7|B9SXB7_RICCO	Prolyl 4-hydroxylase alpha subunit, putative	PF13640: 2OG-Fe(II) oxygenase superfamily	IPR005123: Oxoglutarate/iron-dependent dioxygenase; IPR006620: Prolyl 4-hydroxylase, alpha subunit	GO:0005506 MF: iron ion binding;GO:0016491 MF: oxidoreductase activity;GO:0016705 MF: oxidoreductase activity, acting on paired donors, with incorporation or reduction of molecular oxygen;GO:0031418 MF: L-ascorbic acid binding;GO:0055114 BP: oxidation-reduction process	G
HC	1B	333147904	340147904	QTL_1B_1	+	1	***	tr|T2DMT5|T2DMT5_PHAVU	LanC-like protein	PF05147: Lanthionine synthetase C-like protein	IPR007822: Lanthionine synthetase C-like; IPR020464: LanC-like protein, eukaryotic		G
LC	1B	333147904	340147904	QTL_1B_1	+	1	--*	tr|A0A061ESG5|A0A061ESG5_THECC	High cyclic electron flow 1, putative				G
HC	1B	333147904	340147904	QTL_1B_1	+	1	***	tr|M8B3U0|M8B3U0_TRIUA	Epoxide hydrolase 2	PF00561: alpha/beta hydrolase fold	IPR000073: Alpha/beta hydrolase fold-1; IPR000639: Epoxide hydrolase-like; IPR029058: Alpha/Beta hydrolase fold	GO:0003824 MF: catalytic activity	G
LC	1B	333147904	340147904	QTL_1B_1	+	1	--*	sp|Q318P8|IF2_PROM9	Translation initiation factor IF-2				G
HC	1B	333147904	340147904	QTL_1B_1	+	1	***	tr|M8B3U0|M8B3U0_TRIUA	Epoxide hydrolase 2	PF00561: alpha/beta hydrolase fold	IPR000073: Alpha/beta hydrolase fold-1; IPR000639: Epoxide hydrolase-like; IPR029058: Alpha/Beta hydrolase fold	GO:0003824 MF: catalytic activity	G
LC	1B	333147904	340147904	QTL_1B_1	-	1	***	tr|A0A061E2W4|A0A061E2W4_THECC	Pre-mRNA splicing factor-related	PF06424: PRP1 splicing factor, N-terminal	IPR003107: HAT (Half-A-TPR) repeat; IPR010491: PRP1 splicing factor, N-terminal; IPR011990: Tetratricopeptide-like helical domain; IPR013026: Tetratricopeptide repeat-containing domain; IPR019734: Tetratricopeptide repeat	GO:0000398 BP: mRNA splicing, via spliceosome;GO:0005515 MF: protein binding;GO:0005634 CC: nucleus;GO:0006396 BP: RNA processing	G
LC	1B	333147904	340147904	QTL_1B_1	-	1	***	tr|A0A061E2W4|A0A061E2W4_THECC	Pre-mRNA splicing factor-related	PF06424: PRP1 splicing factor, N-terminal	IPR003107: HAT (Half-A-TPR) repeat; IPR010491: PRP1 splicing factor, N-terminal; IPR011990: Tetratricopeptide-like helical domain; IPR013026: Tetratricopeptide repeat-containing domain; IPR019734: Tetratricopeptide repeat	GO:0000398 BP: mRNA splicing, via spliceosome;GO:0005515 MF: protein binding;GO:0005634 CC: nucleus;GO:0006396 BP: RNA processing	G
LC	1B	333147904	340147904	QTL_1B_1	-	1	***	tr|A0A061E2W4|A0A061E2W4_THECC	Pre-mRNA splicing factor-related	PF06424: PRP1 splicing factor, N-terminal	IPR003107: HAT (Half-A-TPR) repeat; IPR010491: PRP1 splicing factor, N-terminal; IPR011990: Tetratricopeptide-like helical domain; IPR013026: Tetratricopeptide repeat-containing domain; IPR019734: Tetratricopeptide repeat	GO:0000398 BP: mRNA splicing, via spliceosome;GO:0005515 MF: protein binding;GO:0005634 CC: nucleus;GO:0006396 BP: RNA processing	G
LC	1B	333147904	340147904	QTL_1B_1	-	1	***	tr|A0A061E2W4|A0A061E2W4_THECC	Pre-mRNA splicing factor-related	PF06424: PRP1 splicing factor, N-terminal	IPR003107: HAT (Half-A-TPR) repeat; IPR010491: PRP1 splicing factor, N-terminal; IPR011990: Tetratricopeptide-like helical domain; IPR013026: Tetratricopeptide repeat-containing domain; IPR019734: Tetratricopeptide repeat	GO:0000398 BP: mRNA splicing, via spliceosome;GO:0005515 MF: protein binding;GO:0005634 CC: nucleus;GO:0006396 BP: RNA processing	G
LC	1B	333147904	340147904	QTL_1B_1	-	1	*-*	tr|A0A1J3JP11|A0A1J3JP11_NOCCA	Transposon Ty3-I Gag-Pol polyprotein	PF13975: gag-polyprotein putative aspartyl protease	IPR021109: Aspartic peptidase domain		TE
LC	1B	333147904	340147904	QTL_1B_1	+	1	*-*	tr|Q2QPR5|Q2QPR5_ORYSJ	Retrotransposon protein, putative, unclassified	PF04195: Putative gypsy type transposon	IPR007321: Transposase (putative), gypsy type		TE
LC	1B	333147904	340147904	QTL_1B_1	+	1	***	tr|Q7XEE7|Q7XEE7_ORYSJ	BTB/POZ domain containing protein, expressed	PF00651: BTB/POZ domain	IPR000210: BTB/POZ domain; IPR011333: SKP1/BTB/POZ domain	GO:0005515 MF: protein binding	G
HC	1B	333147904	340147904	QTL_1B_1	+	1	***	tr|G7K588|G7K588_MEDTR	RP/EB family microtubule-associated protein	PF00307: Calponin homology (CH) domain; PF03271: EB1-like C-terminal motif	IPR001715: Calponin homology domain; IPR004953: EB1, C-terminal	GO:0005515 MF: protein binding;GO:0008017 MF: microtubule binding	G
HC	1B	333147904	340147904	QTL_1B_1	+	1	***	tr|G7K588|G7K588_MEDTR	RP/EB family microtubule-associated protein	PF00307: Calponin homology (CH) domain; PF03271: EB1-like C-terminal motif	IPR001715: Calponin homology domain; IPR004953: EB1, C-terminal	GO:0005515 MF: protein binding;GO:0008017 MF: microtubule binding	G
LC	1B	333147904	340147904	QTL_1B_1	+	1	--*	AT1G30300.4	Metallo-hydrolase/oxidoreductase superfamily protein				G
HC	1B	333147904	340147904	QTL_1B_1	-	1	***	tr|A0A0K9PQR0|A0A0K9PQR0_ZOSMR	Major facilitator superfamily transporter	PF07690: Major Facilitator Superfamily	IPR011701: Major facilitator superfamily; IPR020846: Major facilitator superfamily domain	GO:0016021 CC: integral component of membrane;GO:0055085 BP: transmembrane transport	G
HC	1B	333147904	340147904	QTL_1B_1	-	1	***	tr|A0A0K9PQR0|A0A0K9PQR0_ZOSMR	Major facilitator superfamily transporter	PF07690: Major Facilitator Superfamily	IPR011701: Major facilitator superfamily; IPR020846: Major facilitator superfamily domain	GO:0016021 CC: integral component of membrane;GO:0055085 BP: transmembrane transport	G
HC	1B	333147904	340147904	QTL_1B_1	-	1	***	tr|A0A1J3IPC4|A0A1J3IPC4_NOCCA	Trafficking protein particle complex subunit 13	PF06159: Protein of unknown function (DUF974)	IPR010378: Protein of unknown function DUF974		G
HC	1B	333147904	340147904	QTL_1B_1	-	0	***	tr|A0A1J3IPC4|A0A1J3IPC4_NOCCA	Trafficking protein particle complex subunit 13	PF06159: Protein of unknown function (DUF974)	IPR010378: Protein of unknown function DUF974		G
HC	1B	333147904	340147904	QTL_1B_1	-	0	***	tr|A0A1J3IPC4|A0A1J3IPC4_NOCCA	Trafficking protein particle complex subunit 13	PF06159: Protein of unknown function (DUF974)	IPR010378: Protein of unknown function DUF974		G
HC	1B	333147904	340147904	QTL_1B_1	-	0	***	tr|A0A199V6P1|A0A199V6P1_ANACO	Mediator of RNA polymerase II transcription subunit 16				G
HC	1B	333147904	340147904	QTL_1B_1	-	1	***	tr|A0A199V6P1|A0A199V6P1_ANACO	Mediator of RNA polymerase II transcription subunit 16		IPR011042: Six-bladed beta-propeller, TolB-like		G
HC	1B	333147904	340147904	QTL_1B_1	-	0	***	tr|A0A199V6P1|A0A199V6P1_ANACO	Mediator of RNA polymerase II transcription subunit 16		IPR015943: WD40/YVTN repeat-like-containing domain	GO:0005515 MF: protein binding	G
HC	1B	333147904	340147904	QTL_1B_1	+	1	***	tr|A0A1E5VLS1|A0A1E5VLS1_9POAL	CBS domain-containing protein CBSX5	PF00571: CBS domain	IPR000644: CBS domain		G
LC	1B	333147904	340147904	QTL_1B_1	-	1	*-*	tr|A0A1D1Z793|A0A1D1Z793_9ARAE	Retrovirus-related Pol polyprotein from transposon TNT 1-94				TE
LC	1B	333147904	340147904	QTL_1B_1	-	1	--*	tr|A0A0K2G5T3|A0A0K2G5T3_9ORYZ	Reverse transcriptase	PF13966: zinc-binding in reverse transcriptase	IPR026960: Reverse transcriptase zinc-binding domain		TE
LC	1B	333147904	340147904	QTL_1B_1	-	1	*-*	tr|Q7XEL6|Q7XEL6_ORYSJ	Zinc knuckle family protein				TE?
LC	1B	333147904	340147904	QTL_1B_1	-	1	--*	sp|P0AC75|KDTA_ECOLI	3-deoxy-D-manno-octulosonic acid transferase				G
LC	1B	333147904	340147904	QTL_1B_1	+	1	--*	sp|Q2JQ31|CCSA_SYNJB	Cytochrome c biogenesis protein CcsA				G
HC	1B	333147904	340147904	QTL_1B_1	+	1	***	tr|B9SZK5|B9SZK5_RICCO	Receptor-kinase, putative	PF08263: Leucine rich repeat N-terminal domain; PF13855: Leucine rich repeat; PF00069: Protein kinase domain	IPR000719: Protein kinase domain; IPR001611: Leucine-rich repeat; IPR003591: Leucine-rich repeat, typical subtype; IPR008271: Serine/threonine-protein kinase, active site; IPR011009: Protein kinase-like domain; IPR013210: Leucine-rich repeat-containing N-terminal, plant-type; IPR017441: Protein kinase, ATP binding site; IPR032675: Leucine-rich repeat domain, L domain-like	GO:0004672 MF: protein kinase activity;GO:0005515 MF: protein binding;GO:0005524 MF: ATP binding;GO:0006468 BP: protein phosphorylation	G
HC	1B	333147904	340147904	QTL_1B_1	+	1	***	tr|B9SZK5|B9SZK5_RICCO	Receptor-kinase, putative	PF08263: Leucine rich repeat N-terminal domain; PF13855: Leucine rich repeat; PF00069: Protein kinase domain	IPR000719: Protein kinase domain; IPR001611: Leucine-rich repeat; IPR003591: Leucine-rich repeat, typical subtype; IPR008271: Serine/threonine-protein kinase, active site; IPR011009: Protein kinase-like domain; IPR013210: Leucine-rich repeat-containing N-terminal, plant-type; IPR017441: Protein kinase, ATP binding site; IPR032675: Leucine-rich repeat domain, L domain-like	GO:0004672 MF: protein kinase activity;GO:0005515 MF: protein binding;GO:0005524 MF: ATP binding;GO:0006468 BP: protein phosphorylation	G
HC	1B	333147904	340147904	QTL_1B_1	+	1	***	tr|B9SZK5|B9SZK5_RICCO	Receptor-kinase, putative	PF08263: Leucine rich repeat N-terminal domain; PF13855: Leucine rich repeat; PF00069: Protein kinase domain	IPR000719: Protein kinase domain; IPR001611: Leucine-rich repeat; IPR003591: Leucine-rich repeat, typical subtype; IPR008271: Serine/threonine-protein kinase, active site; IPR011009: Protein kinase-like domain; IPR013210: Leucine-rich repeat-containing N-terminal, plant-type; IPR017441: Protein kinase, ATP binding site; IPR032675: Leucine-rich repeat domain, L domain-like	GO:0004672 MF: protein kinase activity;GO:0005515 MF: protein binding;GO:0005524 MF: ATP binding;GO:0006468 BP: protein phosphorylation	G
HC	1B	333147904	340147904	QTL_1B_1	+	1	***	tr|B9SZK5|B9SZK5_RICCO	Receptor-kinase, putative	PF08263: Leucine rich repeat N-terminal domain; PF13855: Leucine rich repeat; PF00069: Protein kinase domain	IPR000719: Protein kinase domain; IPR001611: Leucine-rich repeat; IPR003591: Leucine-rich repeat, typical subtype; IPR008271: Serine/threonine-protein kinase, active site; IPR011009: Protein kinase-like domain; IPR013210: Leucine-rich repeat-containing N-terminal, plant-type; IPR017441: Protein kinase, ATP binding site; IPR032675: Leucine-rich repeat domain, L domain-like	GO:0004672 MF: protein kinase activity;GO:0005515 MF: protein binding;GO:0005524 MF: ATP binding;GO:0006468 BP: protein phosphorylation	G
HC	1B	333147904	340147904	QTL_1B_1	+	1	***	tr|Q2R2T0|Q2R2T0_ORYSJ	Maf-like protein, expressed	PF02545: Maf-like protein	IPR003697: Maf-like protein; IPR029001: Inosine triphosphate pyrophosphatase-like	GO:0047429 MF: nucleoside-triphosphate diphosphatase activity	G
LC	1B	333147904	340147904	QTL_1B_1	+	1	--*	AT1G15890.2	Disease resistance protein (CC-NBS-LRR class) family				G
LC	1B	333147904	340147904	QTL_1B_1	+	1	***	AT4G09660.1	zinc finger MYM-type-like protein	PF14291: Domain of unknown function (DUF4371); PF05699: hAT family C-terminal dimerisation region	IPR006580: Zinc finger, TTF-type; IPR008906: HAT, C-terminal dimerisation domain; IPR012337: Ribonuclease H-like domain; IPR025398: Domain of unknown function DUF4371	GO:0003676 MF: nucleic acid binding;GO:0046983 MF: protein dimerization activity	TE
LC	1B	333147904	340147904	QTL_1B_1	+	1	***	AT4G09660.1	zinc finger MYM-type-like protein	PF14291: Domain of unknown function (DUF4371); PF05699: hAT family C-terminal dimerisation region	IPR006580: Zinc finger, TTF-type; IPR008906: HAT, C-terminal dimerisation domain; IPR012337: Ribonuclease H-like domain; IPR025398: Domain of unknown function DUF4371	GO:0003676 MF: nucleic acid binding;GO:0046983 MF: protein dimerization activity	TE
HC	1B	333147904	340147904	QTL_1B_1	+	1	***	sp|Q0IWM5|NDX1_ORYSJ	Protein NEOXANTHIN-DEFICIENT 1		IPR023375: Acetoacetate decarboxylase beta barrel domain		G
LC	1B	333147904	340147904	QTL_1B_1	+	1	*-*	tr|Q2QWY8|Q2QWY8_ORYSJ	Transposon protein, putative, CACTA, En/Spm sub-class				TE
LC	1B	333147904	340147904	QTL_1B_1	+	1	*-*	tr|Q2VEY8|Q2VEY8_PENAM	Transposase	PF13359: DDE superfamily endonuclease	IPR027806: Harbinger transposase-derived nuclease domain		TE
HC	1B	333147904	340147904	QTL_1B_1	+	1	***	tr|A0A0B0PIZ1|A0A0B0PIZ1_GOSAR	RING finger protein	PF14447: Prokaryotic RING finger family 4	IPR001841: Zinc finger, RING-type; IPR013083: Zinc finger, RING/FYVE/PHD-type; IPR017907: Zinc finger, RING-type, conserved site	GO:0005515 MF: protein binding;GO:0008270 MF: zinc ion binding	G
HC	1B	333147904	340147904	QTL_1B_1	+	1	***	tr|A0A0B0PIZ1|A0A0B0PIZ1_GOSAR	RING finger protein	PF14447: Prokaryotic RING finger family 4	IPR001841: Zinc finger, RING-type; IPR013083: Zinc finger, RING/FYVE/PHD-type; IPR017907: Zinc finger, RING-type, conserved site	GO:0005515 MF: protein binding;GO:0008270 MF: zinc ion binding	G
HC	1B	333147904	340147904	QTL_1B_1	-	1	--*	tr|B6U5J1|B6U5J1_MAIZE	N-acetyltransferase	PF00583: Acetyltransferase (GNAT) family	IPR000182: GNAT domain; IPR016181: Acyl-CoA N-acyltransferase	GO:0008080 MF: N-acetyltransferase activity	G
HC	1B	333147904	340147904	QTL_1B_1	+	1	***	tr|M8C536|M8C536_AEGTA	30S ribosomal protein S18	PF01084: Ribosomal protein S18	IPR001648: Ribosomal protein S18	GO:0003735 MF: structural constituent of ribosome;GO:0005622 CC: intracellular;GO:0005840 CC: ribosome;GO:0006412 BP: translation	G
HC	1B	333147904	340147904	QTL_1B_1	+	1	***	tr|M8C536|M8C536_AEGTA	30S ribosomal protein S18	PF01084: Ribosomal protein S18	IPR001648: Ribosomal protein S18	GO:0003735 MF: structural constituent of ribosome;GO:0005622 CC: intracellular;GO:0005840 CC: ribosome;GO:0006412 BP: translation	G
HC	1B	333147904	340147904	QTL_1B_1	+	1	***	tr|M8C536|M8C536_AEGTA	30S ribosomal protein S18	PF01084: Ribosomal protein S18	IPR001648: Ribosomal protein S18	GO:0003735 MF: structural constituent of ribosome;GO:0005622 CC: intracellular;GO:0005840 CC: ribosome;GO:0006412 BP: translation	G
HC	1B	333147904	340147904	QTL_1B_1	+	1	***	tr|M8C536|M8C536_AEGTA	30S ribosomal protein S18	PF01084: Ribosomal protein S18	IPR001648: Ribosomal protein S18	GO:0003735 MF: structural constituent of ribosome;GO:0005622 CC: intracellular;GO:0005840 CC: ribosome;GO:0006412 BP: translation	G
HC	1B	333147904	340147904	QTL_1B_1	+	1	***	AT4G28260.2	acyl-UDP-N-acetylglucosamine O-acyltransferase		IPR013083: Zinc finger, RING/FYVE/PHD-type; IPR013087: Zinc finger C2H2-type	GO:0003676 MF: nucleic acid binding	G
HC	1B	333147904	340147904	QTL_1B_1	+	1	*-*	tr|A0A0N7IZQ6|A0A0N7IZQ6_ZOSMR	Monothiol glutaredoxin	PF00085: Thioredoxin; PF00462: Glutaredoxin	IPR002109: Glutaredoxin; IPR004480: Monothiol glutaredoxin-related; IPR012336: Thioredoxin-like fold; IPR013766: Thioredoxin domain	GO:0009055 MF: electron carrier activity;GO:0015035 MF: protein disulfide oxidoreductase activity;GO:0045454 BP: cell redox homeostasis	G
HC	1B	333147904	340147904	QTL_1B_1	+	1	*-*	tr|A0A0N7IZQ6|A0A0N7IZQ6_ZOSMR	Monothiol glutaredoxin	PF00085: Thioredoxin; PF00462: Glutaredoxin	IPR002109: Glutaredoxin; IPR004480: Monothiol glutaredoxin-related; IPR012336: Thioredoxin-like fold; IPR013766: Thioredoxin domain	GO:0009055 MF: electron carrier activity;GO:0015035 MF: protein disulfide oxidoreductase activity;GO:0045454 BP: cell redox homeostasis	G
HC	1B	333147904	340147904	QTL_1B_1	+	1	*-*	tr|A0A0N7IZQ6|A0A0N7IZQ6_ZOSMR	Monothiol glutaredoxin	PF00085: Thioredoxin; PF00462: Glutaredoxin	IPR002109: Glutaredoxin; IPR004480: Monothiol glutaredoxin-related; IPR012336: Thioredoxin-like fold; IPR013766: Thioredoxin domain	GO:0009055 MF: electron carrier activity;GO:0015035 MF: protein disulfide oxidoreductase activity;GO:0045454 BP: cell redox homeostasis	G
HC	1B	333147904	340147904	QTL_1B_1	+	0	*-*	tr|A0A0N7IZQ6|A0A0N7IZQ6_ZOSMR	Monothiol glutaredoxin	PF00085: Thioredoxin; PF00462: Glutaredoxin	IPR002109: Glutaredoxin; IPR004480: Monothiol glutaredoxin-related; IPR012336: Thioredoxin-like fold; IPR013766: Thioredoxin domain	GO:0009055 MF: electron carrier activity;GO:0015035 MF: protein disulfide oxidoreductase activity;GO:0045454 BP: cell redox homeostasis	G
HC	1B	333147904	340147904	QTL_1B_1	+	0	*-*	tr|A0A0N7IZQ6|A0A0N7IZQ6_ZOSMR	Monothiol glutaredoxin	PF00085: Thioredoxin; PF00462: Glutaredoxin	IPR002109: Glutaredoxin; IPR004480: Monothiol glutaredoxin-related; IPR012336: Thioredoxin-like fold; IPR013766: Thioredoxin domain	GO:0009055 MF: electron carrier activity;GO:0015035 MF: protein disulfide oxidoreductase activity;GO:0045454 BP: cell redox homeostasis	G
HC	1B	333147904	340147904	QTL_1B_1	+	0	*-*	tr|A0A0N7IZQ6|A0A0N7IZQ6_ZOSMR	Monothiol glutaredoxin	PF00085: Thioredoxin; PF00462: Glutaredoxin	IPR002109: Glutaredoxin; IPR004480: Monothiol glutaredoxin-related; IPR012336: Thioredoxin-like fold; IPR013766: Thioredoxin domain	GO:0009055 MF: electron carrier activity;GO:0015035 MF: protein disulfide oxidoreductase activity;GO:0045454 BP: cell redox homeostasis	G
LC	1B	333147904	340147904	QTL_1B_1	-	1	--*	AT3G24255.5	RNA-directed DNA polymerase (reverse transcriptase)-related family protein	PF13966: zinc-binding in reverse transcriptase	IPR026960: Reverse transcriptase zinc-binding domain		TE
HC	1B	333147904	340147904	QTL_1B_1	-	1	*-*	tr|A0A1E5WB67|A0A1E5WB67_9POAL	Pentatricopeptide repeat-containing protein	PF01535: PPR repeat; PF13041: PPR repeat family	IPR002885: Pentatricopeptide repeat; IPR011990: Tetratricopeptide-like helical domain	GO:0005515 MF: protein binding	G
HC	1B	333147904	340147904	QTL_1B_1	+	1	***	tr|B9RW08|B9RW08_RICCO	Pentatricopeptide repeat-containing protein, putative	PF01535: PPR repeat; PF13041: PPR repeat family	IPR002885: Pentatricopeptide repeat; IPR011990: Tetratricopeptide-like helical domain	GO:0005515 MF: protein binding	G
LC	1B	333147904	340147904	QTL_1B_1	-	1	***	tr|A0A151RQY5|A0A151RQY5_CAJCA	Retrovirus-related Pol polyprotein from transposon TNT 1-94	PF14223: gag-polypeptide of LTR copia-type			TE
LC	1B	333147904	340147904	QTL_1B_1	-	1	--*	tr|A0A0D9V6T5|A0A0D9V6T5_9ORYZ	DNA-(apurinic or apyrimidinic site) lyase		IPR005135: Endonuclease/exonuclease/phosphatase		TE?
LC	1B	333147904	340147904	QTL_1B_1	-	1	--*	sp|B4NW98|EIF3I_DROYA	Eukaryotic translation initiation factor 3 subunit I	PF13966: zinc-binding in reverse transcriptase	IPR026960: Reverse transcriptase zinc-binding domain		TE?
LC	1B	333147904	340147904	QTL_1B_1	-	1	*-*	tr|Q10IA6|Q10IA6_ORYSJ	Retrotransposon protein, putative, unclassified				TE
HC	1B	333147904	340147904	QTL_1B_1	+	1	***	tr|A0A1D1XS02|A0A1D1XS02_9ARAE	Calcium uniporter protein, mitochondrial	PF04678: Mitochondrial calcium uniporter	IPR006769: Coiled-coil domain containing protein 109, C-terminal		G
LC	1B	333147904	340147904	QTL_1B_1	-	1	--*	AT1G04625.1	Polynucleotidyl transferase, ribonuclease H-like superfamily protein	PF13456: Reverse transcriptase-like	IPR012337: Ribonuclease H-like domain	GO:0003676 MF: nucleic acid binding	TE
LC	1B	333147904	340147904	QTL_1B_1	-	1	*-*	tr|Q10IA6|Q10IA6_ORYSJ	Retrotransposon protein, putative, unclassified	PF14111: Domain of unknown function (DUF4283)	IPR025558: Domain of unknown function DUF4283		TE
HC	1B	333147904	340147904	QTL_1B_1	-	1	***	tr|B9HTE8|B9HTE8_POPTR	Short-chain dehydrogenase/reductase family protein	PF00106: short chain dehydrogenase	IPR002347: Short-chain dehydrogenase/reductase SDR; IPR016040: NAD(P)-binding domain; IPR020904: Short-chain dehydrogenase/reductase, conserved site	GO:0016491 MF: oxidoreductase activity	G
LC	1B	333147904	340147904	QTL_1B_1	-	1	--*	tr|A0A061GDQ9|A0A061GDQ9_THECC	Maternal effect embryo arrest 18				G
LC	1B	333147904	340147904	QTL_1B_1	-	1	*-*	tr|Q10D55|Q10D55_ORYSJ	Retrotransposon protein, putative, unclassified				TE
LC	1B	333147904	340147904	QTL_1B_1	-	1	*-*	tr|Q10D55|Q10D55_ORYSJ	Retrotransposon protein, putative, unclassified	PF03372: Endonuclease/Exonuclease/phosphatase family	IPR005135: Endonuclease/exonuclease/phosphatase		TE
LC	1B	333147904	340147904	QTL_1B_1	-	1	*-*	tr|R7WC57|R7WC57_AEGTA	D-3-phosphoglycerate dehydrogenase				G
HC	1B	333147904	340147904	QTL_1B_1	-	1	***	tr|A0A0B0NBZ2|A0A0B0NBZ2_GOSAR	Laminin subunit alpha-1				G
HC	1B	333147904	340147904	QTL_1B_1	-	0	***	tr|A0A0B0NBZ2|A0A0B0NBZ2_GOSAR	Laminin subunit alpha-1				G
HC	1B	333147904	340147904	QTL_1B_1	-	0	***	tr|A0A1D1YYW0|A0A1D1YYW0_9ARAE	DNA-directed RNA polymerase subunit beta				G
LC	1B	333147904	340147904	QTL_1B_1	+	1	--*	AT4G13800.9	magnesium transporter NIPA (DUF803)				G
LC	1B	333147904	340147904	QTL_1B_1	-	1	*-*	tr|Q2QNF1|Q2QNF1_ORYSJ	Retrotransposon protein, putative, unclassified	PF03372: Endonuclease/Exonuclease/phosphatase family	IPR005135: Endonuclease/exonuclease/phosphatase		TE
LC	1B	333147904	340147904	QTL_1B_1	-	1	--*	sp|Q9TTK6|AOC3_BOVIN	Membrane primary amine oxidase				G
LC	1B	333147904	340147904	QTL_1B_1	+	1	--*	sp|Q62414|NDF2_MOUSE	Neurogenic differentiation factor 2				G
HC	1B	333147904	340147904	QTL_1B_1	-	1	***	tr|Q9FEK9|Q9FEK9_TRITD	Lipid transfer protein	PF14368: Probable lipid transfer	IPR016140: Bifunctional inhibitor/plant lipid transfer protein/seed storage helical domain		G
LC	1B	333147904	340147904	QTL_1B_1	+	1	--*	tr|D0UQA7|D0UQA7_9MYRI	Serine/threonine-protein phosphatase 2A 55 kDa regulatory subunit B		IPR012337: Ribonuclease H-like domain	GO:0003676 MF: nucleic acid binding	TE?
LC	1B	333147904	340147904	QTL_1B_1	+	1	--*	sp|A8C8K0|NS1_I07A0	Non-structural protein 1				G
LC	1B	333147904	340147904	QTL_1B_1	-	1	--*	sp|P0C6X7|R1AB_CVHSA	Replicase polyprotein 1ab				TE
LC	1B	333147904	340147904	QTL_1B_1	-	1	--*	sp|Q7W749|LEUD2_BORPA	3-isopropylmalate dehydratase small subunit 2				G
LC	1B	333147904	340147904	QTL_1B_1	-	1	*--	tr|M7YJA2|M7YJA2_TRIUA	Phosphatidylserine decarboxylase proenzyme 1, mitochondrial				G
LC	1B	333147904	340147904	QTL_1B_1	-	1	*-*	tr|Q53MK7|Q53MK7_ORYSJ	Ulp1 protease family, C-terminal catalytic domain containing protein, expressed				G
LC	1B	333147904	340147904	QTL_1B_1	-	1	*-*	tr|A0A151RMX2|A0A151RMX2_CAJCA	Vacuolar protein sorting-associated protein 4		IPR007330: MIT		G
LC	1B	333147904	340147904	QTL_1B_1	+	1	--*	sp|B4F280|RL31B_PROMH	50S ribosomal protein L31 type B		IPR012337: Ribonuclease H-like domain	GO:0003676 MF: nucleic acid binding	TE?
LC	1B	333147904	340147904	QTL_1B_1	+	1	--*	tr|A0A067LDP4|A0A067LDP4_JATCU	L-aspartate oxidase				G
LC	1B	333147904	340147904	QTL_1B_1	-	1	*-*	tr|Q10LP8|Q10LP8_ORYSJ	Retrotransposon protein, putative, unclassified	PF13966: zinc-binding in reverse transcriptase	IPR026960: Reverse transcriptase zinc-binding domain		TE
LC	1B	333147904	340147904	QTL_1B_1	-	1	*-*	tr|Q53LN6|Q53LN6_ORYSJ	Retrotransposon protein, putative, unclassified	PF04195: Putative gypsy type transposon	IPR007321: Transposase (putative), gypsy type		TE
LC	1B	333147904	340147904	QTL_1B_1	-	1	--*	AT1G67890.4	PAS domain-containing protein tyrosine kinase family protein				G
HC	1B	333147904	340147904	QTL_1B_1	-	1	--*	AT1G63640.4	P-loop nucleoside triphosphate hydrolases superfamily protein with CH (Calponin Homology) domain-containing protein	PF07762: Protein of unknown function (DUF1618)	IPR011676: Domain of unknown function DUF1618		G
LC	1B	333147904	340147904	QTL_1B_1	+	1	--*	sp|D3ZAR1|ARH_RAT	Low density lipoprotein receptor adapter protein 1				G
LC	1B	333147904	340147904	QTL_1B_1	+	1	***	tr|A0A1I9KXH2|A0A1I9KXH2_9ASPA	50S ribosomal protein L14	PF00238: Ribosomal protein L14p/L23e	IPR000218: Ribosomal protein L14P	GO:0003735 MF: structural constituent of ribosome;GO:0005840 CC: ribosome;GO:0006412 BP: translation	G
LC	1B	333147904	340147904	QTL_1B_1	+	1	***	tr|A0A1I9KXH2|A0A1I9KXH2_9ASPA	50S ribosomal protein L14	PF00238: Ribosomal protein L14p/L23e	IPR000218: Ribosomal protein L14P	GO:0003735 MF: structural constituent of ribosome;GO:0005840 CC: ribosome;GO:0006412 BP: translation	G
LC	1B	333147904	340147904	QTL_1B_1	+	1	***	tr|A0A1I9KXH2|A0A1I9KXH2_9ASPA	50S ribosomal protein L14	PF00238: Ribosomal protein L14p/L23e	IPR000218: Ribosomal protein L14P	GO:0003735 MF: structural constituent of ribosome;GO:0005840 CC: ribosome;GO:0006412 BP: translation	G
HC	1B	333147904	340147904	QTL_1B_1	+	1	***	tr|A0A191TDJ1|A0A191TDJ1_HORVV	Cytochrome c biogenesis FC				G
LC	1B	333147904	340147904	QTL_1B_1	+	1	*-*	tr|A0A191TDJ1|A0A191TDJ1_HORVV	Cytochrome c biogenesis FC				G
HC	1B	333147904	340147904	QTL_1B_1	+	1	***	tr|Q9MJC2|Q9MJC2_MAIZE	URF 2				G
LC	1B	333147904	340147904	QTL_1B_1	+	1	*-*	tr|M4YQN8|M4YQN8_LOLPR	NADH-ubiquinone oxidoreductase chain 5	PF06455: NADH dehydrogenase subunit 5 C-terminus	IPR010934: NADH dehydrogenase subunit 5, C-terminal	GO:0008137 MF: NADH dehydrogenase (ubiquinone) activity;GO:0042773 BP: ATP synthesis coupled electron transport;GO:0055114 BP: oxidation-reduction process	G
LC	1B	333147904	340147904	QTL_1B_1	+	1	*-*	tr|M4YQN8|M4YQN8_LOLPR	NADH-ubiquinone oxidoreductase chain 5	PF06455: NADH dehydrogenase subunit 5 C-terminus	IPR010934: NADH dehydrogenase subunit 5, C-terminal	GO:0008137 MF: NADH dehydrogenase (ubiquinone) activity;GO:0042773 BP: ATP synthesis coupled electron transport;GO:0055114 BP: oxidation-reduction process	G
LC	1B	333147904	340147904	QTL_1B_1	+	1	*-*	tr|M4YQN8|M4YQN8_LOLPR	NADH-ubiquinone oxidoreductase chain 5	PF06455: NADH dehydrogenase subunit 5 C-terminus	IPR010934: NADH dehydrogenase subunit 5, C-terminal	GO:0008137 MF: NADH dehydrogenase (ubiquinone) activity;GO:0042773 BP: ATP synthesis coupled electron transport;GO:0055114 BP: oxidation-reduction process	G
LC	1B	333147904	340147904	QTL_1B_1	-	1	--*	AT1G21680.1	DPP6 N-terminal domain-like protein				G
LC	1B	333147904	340147904	QTL_1B_1	-	1	--*	sp|Q9ZKY6|COAX_HELPJ	Type III pantothenate kinase				G
HC	1B	333147904	340147904	QTL_1B_1	+	1	***	tr|B8Q6P1|B8Q6P1_BAMOL	NADH-ubiquinone oxidoreductase chain 4	PF00361: Proton-conducting membrane transporter	IPR001750: NADH:quinone oxidoreductase/Mrp antiporter, membrane subunit; IPR003918: NADH:ubiquinone oxidoreductase; IPR010227: NADH-quinone oxidoreductase, chain M/4	GO:0008137 MF: NADH dehydrogenase (ubiquinone) activity;GO:0042773 BP: ATP synthesis coupled electron transport;GO:0055114 BP: oxidation-reduction process	G
HC	1B	333147904	340147904	QTL_1B_1	+	1	***	tr|B8Q6P1|B8Q6P1_BAMOL	NADH-ubiquinone oxidoreductase chain 4	PF00361: Proton-conducting membrane transporter	IPR001750: NADH:quinone oxidoreductase/Mrp antiporter, membrane subunit; IPR003918: NADH:ubiquinone oxidoreductase; IPR010227: NADH-quinone oxidoreductase, chain M/4	GO:0008137 MF: NADH dehydrogenase (ubiquinone) activity;GO:0042773 BP: ATP synthesis coupled electron transport;GO:0055114 BP: oxidation-reduction process	G
HC	1B	333147904	340147904	QTL_1B_1	+	1	***	tr|B8Q6P1|B8Q6P1_BAMOL	NADH-ubiquinone oxidoreductase chain 4	PF00361: Proton-conducting membrane transporter	IPR001750: NADH:quinone oxidoreductase/Mrp antiporter, membrane subunit; IPR003918: NADH:ubiquinone oxidoreductase; IPR010227: NADH-quinone oxidoreductase, chain M/4	GO:0008137 MF: NADH dehydrogenase (ubiquinone) activity;GO:0042773 BP: ATP synthesis coupled electron transport;GO:0055114 BP: oxidation-reduction process	G
HC	1B	333147904	340147904	QTL_1B_1	+	1	*-*	tr|S4Z1X0|S4Z1X0_HORVV	Photosystem I P700 chlorophyll a apoprotein A1	PF00223: Photosystem I psaA/psaB protein	IPR001280: Photosystem I PsaA/PsaB; IPR020586: Photosystem I PsaA/PsaB, conserved site	GO:0009522 CC: photosystem I;GO:0009579 CC: thylakoid;GO:0015979 BP: photosynthesis;GO:0016021 CC: integral component of membrane	G
HC	1B	333147904	340147904	QTL_1B_1	+	1	*-*	tr|S4Z1X0|S4Z1X0_HORVV	Photosystem I P700 chlorophyll a apoprotein A1	PF00223: Photosystem I psaA/psaB protein	IPR001280: Photosystem I PsaA/PsaB; IPR020586: Photosystem I PsaA/PsaB, conserved site	GO:0009522 CC: photosystem I;GO:0009579 CC: thylakoid;GO:0015979 BP: photosynthesis;GO:0016021 CC: integral component of membrane	G
HC	1B	333147904	340147904	QTL_1B_1	+	1	*-*	tr|S4Z1X0|S4Z1X0_HORVV	Photosystem I P700 chlorophyll a apoprotein A1	PF00223: Photosystem I psaA/psaB protein	IPR001280: Photosystem I PsaA/PsaB; IPR020586: Photosystem I PsaA/PsaB, conserved site	GO:0009522 CC: photosystem I;GO:0009579 CC: thylakoid;GO:0015979 BP: photosynthesis;GO:0016021 CC: integral component of membrane	G
HC	1B	333147904	340147904	QTL_1B_1	+	1	*-*	tr|S4Z1X0|S4Z1X0_HORVV	Photosystem I P700 chlorophyll a apoprotein A1	PF00223: Photosystem I psaA/psaB protein	IPR001280: Photosystem I PsaA/PsaB; IPR020586: Photosystem I PsaA/PsaB, conserved site	GO:0009522 CC: photosystem I;GO:0009579 CC: thylakoid;GO:0015979 BP: photosynthesis;GO:0016021 CC: integral component of membrane	G
LC	1B	333147904	340147904	QTL_1B_1	+	1	*-*	tr|A0A140G1R3|A0A140G1R3_TOBAC	Photosystem I P700 chlorophyll a apoprotein A1	PF00223: Photosystem I psaA/psaB protein	IPR001280: Photosystem I PsaA/PsaB	GO:0009522 CC: photosystem I;GO:0009579 CC: thylakoid;GO:0015979 BP: photosynthesis;GO:0016021 CC: integral component of membrane	G
LC	1B	333147904	340147904	QTL_1B_1	+	1	*-*	tr|A0A140G1R3|A0A140G1R3_TOBAC	Photosystem I P700 chlorophyll a apoprotein A1	PF00223: Photosystem I psaA/psaB protein	IPR001280: Photosystem I PsaA/PsaB	GO:0009522 CC: photosystem I;GO:0009579 CC: thylakoid;GO:0015979 BP: photosynthesis;GO:0016021 CC: integral component of membrane	G
LC	1B	333147904	340147904	QTL_1B_1	+	1	*-*	tr|A0A140G1R3|A0A140G1R3_TOBAC	Photosystem I P700 chlorophyll a apoprotein A1	PF00223: Photosystem I psaA/psaB protein	IPR001280: Photosystem I PsaA/PsaB	GO:0009522 CC: photosystem I;GO:0009579 CC: thylakoid;GO:0015979 BP: photosynthesis;GO:0016021 CC: integral component of membrane	G
LC	1B	333147904	340147904	QTL_1B_1	+	1	*-*	tr|A0A140G1R3|A0A140G1R3_TOBAC	Photosystem I P700 chlorophyll a apoprotein A1	PF00223: Photosystem I psaA/psaB protein	IPR001280: Photosystem I PsaA/PsaB	GO:0009522 CC: photosystem I;GO:0009579 CC: thylakoid;GO:0015979 BP: photosynthesis;GO:0016021 CC: integral component of membrane	G
LC	1B	333147904	340147904	QTL_1B_1	+	1	*-*	tr|A0A142D7X5|A0A142D7X5_ORYMI	Cytochrome c biogenesis Fc				G
LC	1B	333147904	340147904	QTL_1B_1	-	1	--*	sp|Q9I8D0|VPP1_CHICK	V-type proton ATPase 116 kDa subunit a isoform 1				G
HC	1B	333147904	340147904	QTL_1B_1	+	1	*-*	tr|A0A191TDJ1|A0A191TDJ1_HORVV	Cytochrome c biogenesis FC				G
LC	1B	333147904	340147904	QTL_1B_1	-	1	--*	AT5G18820.3	TCP-1/cpn60 chaperonin family protein				G
LC	1B	333147904	340147904	QTL_1B_1	-	1	--*	sp|A7GXQ8|ILVC_CAMC5	Ketol-acid reductoisomerase (NADP(+))				G
LC	1B	333147904	340147904	QTL_1B_1	+	1	*-*	tr|A0A199UEQ5|A0A199UEQ5_ANACO	NADH-ubiquinone oxidoreductase chain 4				G
LC	1B	333147904	340147904	QTL_1B_1	+	1	*-*	tr|A0A142D7X0|A0A142D7X0_ORYMI	NADH dehydrogenase subunit 4				G
LC	1B	333147904	340147904	QTL_1B_1	+	1	*-*	tr|A0A191TDL0|A0A191TDL0_HORVV	NADH-ubiquinone oxidoreductase chain 4	PF00361: Proton-conducting membrane transporter	IPR001750: NADH:quinone oxidoreductase/Mrp antiporter, membrane subunit		G
LC	1B	333147904	340147904	QTL_1B_1	+	1	*-*	tr|V9MFY4|V9MFY4_9POAL	ATP-dependent Clp protease proteolytic subunit				G
LC	1B	333147904	340147904	QTL_1B_1	+	1	***	tr|B6RZY9|B6RZY9_WHEAT	Ribosomal protein S3	PF00189: Ribosomal protein S3, C-terminal domain	IPR001351: Ribosomal protein S3, C-terminal; IPR009019: K homology domain, prokaryotic type	GO:0003723 MF: RNA binding;GO:0003735 MF: structural constituent of ribosome;GO:0005840 CC: ribosome;GO:0006412 BP: translation	G
LC	1B	333147904	340147904	QTL_1B_1	+	1	***	tr|B6RZY9|B6RZY9_WHEAT	Ribosomal protein S3	PF00189: Ribosomal protein S3, C-terminal domain	IPR001351: Ribosomal protein S3, C-terminal; IPR009019: K homology domain, prokaryotic type	GO:0003723 MF: RNA binding;GO:0003735 MF: structural constituent of ribosome;GO:0005840 CC: ribosome;GO:0006412 BP: translation	G
LC	1B	333147904	340147904	QTL_1B_1	+	1	***	tr|B6RZY9|B6RZY9_WHEAT	Ribosomal protein S3	PF00189: Ribosomal protein S3, C-terminal domain	IPR001351: Ribosomal protein S3, C-terminal; IPR009019: K homology domain, prokaryotic type	GO:0003723 MF: RNA binding;GO:0003735 MF: structural constituent of ribosome;GO:0005840 CC: ribosome;GO:0006412 BP: translation	G
LC	1B	333147904	340147904	QTL_1B_1	+	1	***	tr|B6RZY9|B6RZY9_WHEAT	Ribosomal protein S3	PF00189: Ribosomal protein S3, C-terminal domain	IPR001351: Ribosomal protein S3, C-terminal; IPR009019: K homology domain, prokaryotic type	GO:0003723 MF: RNA binding;GO:0003735 MF: structural constituent of ribosome;GO:0005840 CC: ribosome;GO:0006412 BP: translation	G
LC	1B	333147904	340147904	QTL_1B_1	-	1	--*	sp|P16123|URE2_PROHU	Urease subunit beta				G
LC	1B	333147904	340147904	QTL_1B_1	+	1	*-*	tr|U5U5P7|U5U5P7_9CHLO	50S ribosomal protein L16	PF00252: Ribosomal protein L16p/L10e	IPR016180: Ribosomal protein L10e/L16	GO:0003735 MF: structural constituent of ribosome;GO:0005840 CC: ribosome;GO:0006412 BP: translation	G
LC	1B	333147904	340147904	QTL_1B_1	+	1	*-*	tr|U5U5P7|U5U5P7_9CHLO	50S ribosomal protein L16	PF00252: Ribosomal protein L16p/L10e	IPR016180: Ribosomal protein L10e/L16	GO:0003735 MF: structural constituent of ribosome;GO:0005840 CC: ribosome;GO:0006412 BP: translation	G
LC	1B	333147904	340147904	QTL_1B_1	+	1	*-*	tr|U5U5P7|U5U5P7_9CHLO	50S ribosomal protein L16	PF00252: Ribosomal protein L16p/L10e	IPR016180: Ribosomal protein L10e/L16	GO:0003735 MF: structural constituent of ribosome;GO:0005840 CC: ribosome;GO:0006412 BP: translation	G
LC	1B	333147904	340147904	QTL_1B_1	-	1	--*	sp|Q5WF43|EFP_BACSK	Elongation factor P				G
LC	1B	333147904	340147904	QTL_1B_1	+	1	*-*	tr|A0A0B2R0V5|A0A0B2R0V5_GLYSO	LINE-1 reverse transcriptase like	PF00078: Reverse transcriptase (RNA-dependent DNA polymerase)	IPR000477: Reverse transcriptase domain		TE
LC	1B	333147904	340147904	QTL_1B_1	+	1	--*	AT3G48150.1	anaphase-promoting complex subunit 8				G
LC	1B	333147904	340147904	QTL_1B_1	-	1	--*	AT3G06290.4	SAC3/GANP/Nin1/mts3/eIF-3 p25 family				G
LC	1B	333147904	340147904	QTL_1B_1	-	1	--*	sp|Q8E0U0|AROA_STRA5	3-phosphoshikimate 1-carboxyvinyltransferase				G
LC	1B	333147904	340147904	QTL_1B_1	+	1	--*	sp|Q47VQ6|MRAY_COLP3	Phospho-N-acetylmuramoyl-pentapeptide-transferase				G
LC	1B	333147904	340147904	QTL_1B_1	-	1	--*	sp|Q38VD0|GATB_LACSS	Aspartyl/glutamyl-tRNA(Asn/Gln) amidotransferase subunit B				G
LC	1B	333147904	340147904	QTL_1B_1	-	1	--*	sp|P80900|PORA_METTM	Pyruvate synthase subunit PorA				G
LC	1B	333147904	340147904	QTL_1B_1	-	1	--*	AT1G63640.5	P-loop nucleoside triphosphate hydrolases superfamily protein with CH (Calponin Homology) domain-containing protein				G
LC	1B	333147904	340147904	QTL_1B_1	-	1	--*	tr|A0A061GZP2|A0A061GZP2_THECC	Nicalin				G
LC	1B	333147904	340147904	QTL_1B_1	-	1	--*	AT4G27420.1	ABC-2 type transporter family protein				G
HC	1B	333147904	340147904	QTL_1B_1	-	1	--*	sp|Q2U4X9|LCPS_ASPOR	Bifunctional lycopene cyclase/phytoene synthase				G
LC	1B	333147904	340147904	QTL_1B_1	+	1	--*	AT1G28060.3	Pre-mRNA-splicing factor 3				G
HC	1B	333147904	340147904	QTL_1B_1	-	1	***	tr|Q9FEK9|Q9FEK9_TRITD	Lipid transfer protein	PF14368: Probable lipid transfer	IPR016140: Bifunctional inhibitor/plant lipid transfer protein/seed storage helical domain		G
HC	1B	333147904	340147904	QTL_1B_1	+	1	--*	sp|Q4ULS4|SYFB_RICFE	Phenylalanine--tRNA ligase beta subunit	PF07762: Protein of unknown function (DUF1618)	IPR011676: Domain of unknown function DUF1618		G
LC	1B	333147904	340147904	QTL_1B_1	+	1	--*	sp|Q5RDG7|MYLK3_PONAB	Myosin light chain kinase 3				G
HC	1B	369643402	376643402	QTL_1B_2	+	1	***	tr|A0A1D5RQI5|A0A1D5RQI5_WHEAT	Non-lysosomal glucosylceramidase	PF12215: beta-glucosidase 2, glycosyl-hydrolase family 116 N-term; PF04685: Glycosyl-hydrolase family 116, catalytic region	IPR006775: Glycosyl-hydrolase family 116, catalytic region; IPR008928: Six-hairpin glycosidase-like; IPR014551: Beta-glucosidase GBA2-type; IPR024462: Glycosyl-hydrolase family 116, N-terminal	GO:0003824 MF: catalytic activity;GO:0004348 MF: glucosylceramidase activity;GO:0004553 MF: hydrolase activity, hydrolyzing O-glycosyl compounds;GO:0006680 BP: glucosylceramide catabolic process;GO:0016020 CC: membrane	G
HC	1B	369643402	376643402	QTL_1B_2	+	1	***	tr|A0A1D5RQI5|A0A1D5RQI5_WHEAT	Non-lysosomal glucosylceramidase	PF12215: beta-glucosidase 2, glycosyl-hydrolase family 116 N-term; PF04685: Glycosyl-hydrolase family 116, catalytic region	IPR006775: Glycosyl-hydrolase family 116, catalytic region; IPR008928: Six-hairpin glycosidase-like; IPR014551: Beta-glucosidase GBA2-type; IPR024462: Glycosyl-hydrolase family 116, N-terminal	GO:0003824 MF: catalytic activity;GO:0004348 MF: glucosylceramidase activity;GO:0004553 MF: hydrolase activity, hydrolyzing O-glycosyl compounds;GO:0006680 BP: glucosylceramide catabolic process;GO:0016020 CC: membrane	G
HC	1B	369643402	376643402	QTL_1B_2	+	1	***	tr|A0A1D5RQI5|A0A1D5RQI5_WHEAT	Non-lysosomal glucosylceramidase	PF12215: beta-glucosidase 2, glycosyl-hydrolase family 116 N-term; PF04685: Glycosyl-hydrolase family 116, catalytic region	IPR006775: Glycosyl-hydrolase family 116, catalytic region; IPR008928: Six-hairpin glycosidase-like; IPR014551: Beta-glucosidase GBA2-type; IPR024462: Glycosyl-hydrolase family 116, N-terminal	GO:0003824 MF: catalytic activity;GO:0004348 MF: glucosylceramidase activity;GO:0004553 MF: hydrolase activity, hydrolyzing O-glycosyl compounds;GO:0006680 BP: glucosylceramide catabolic process;GO:0016020 CC: membrane	G
HC	1B	369643402	376643402	QTL_1B_2	+	1	***	tr|A0A1D5RQI5|A0A1D5RQI5_WHEAT	Non-lysosomal glucosylceramidase	PF12215: beta-glucosidase 2, glycosyl-hydrolase family 116 N-term; PF04685: Glycosyl-hydrolase family 116, catalytic region	IPR006775: Glycosyl-hydrolase family 116, catalytic region; IPR008928: Six-hairpin glycosidase-like; IPR014551: Beta-glucosidase GBA2-type; IPR024462: Glycosyl-hydrolase family 116, N-terminal	GO:0003824 MF: catalytic activity;GO:0004348 MF: glucosylceramidase activity;GO:0004553 MF: hydrolase activity, hydrolyzing O-glycosyl compounds;GO:0006680 BP: glucosylceramide catabolic process;GO:0016020 CC: membrane	G
HC	1B	369643402	376643402	QTL_1B_2	+	1	***	tr|A0A1D5RQI5|A0A1D5RQI5_WHEAT	Non-lysosomal glucosylceramidase	PF12215: beta-glucosidase 2, glycosyl-hydrolase family 116 N-term; PF04685: Glycosyl-hydrolase family 116, catalytic region	IPR006775: Glycosyl-hydrolase family 116, catalytic region; IPR008928: Six-hairpin glycosidase-like; IPR014551: Beta-glucosidase GBA2-type; IPR024462: Glycosyl-hydrolase family 116, N-terminal	GO:0003824 MF: catalytic activity;GO:0004348 MF: glucosylceramidase activity;GO:0004553 MF: hydrolase activity, hydrolyzing O-glycosyl compounds;GO:0006680 BP: glucosylceramide catabolic process;GO:0016020 CC: membrane	G
LC	1B	369643402	376643402	QTL_1B_2	+	1	*-*	tr|B6U487|B6U487_MAIZE	RNA binding protein	PF00076: RNA recognition motif. (a.k.a. RRM, RBD, or RNP domain)	IPR000504: RNA recognition motif domain	GO:0003676 MF: nucleic acid binding	G
HC	1B	369643402	376643402	QTL_1B_2	+	1	-**	tr|G7IDW5|G7IDW5_MEDTR	Membrane-associated kinase regulator-like protein, putative				G
LC	1B	369643402	376643402	QTL_1B_2	-	1	*-*	tr|A0A1J3CSW7|A0A1J3CSW7_NOCCA	Transposon Ty3-I Gag-Pol polyprotein	PF00078: Reverse transcriptase (RNA-dependent DNA polymerase)	IPR000477: Reverse transcriptase domain		TE
LC	1B	369643402	376643402	QTL_1B_2	+	1	*-*	tr|M7ZQ19|M7ZQ19_TRIUA	Retrovirus-related Pol polyprotein from transposon TNT 1-94				TE
HC	1B	369643402	376643402	QTL_1B_2	+	0	***	AT2G30700.2	GPI-anchored protein				G
HC	1B	369643402	376643402	QTL_1B_2	+	1	***	AT2G30700.2	GPI-anchored protein				G
HC	1B	369643402	376643402	QTL_1B_2	+	0	***	AT2G30700.1	GPI-anchored protein				G
LC	1B	369643402	376643402	QTL_1B_2	+	1	*-*	tr|Q53P52|Q53P52_ORYSJ	Retrotransposon protein, putative, LINE subclass				TE
HC	1B	369643402	376643402	QTL_1B_2	-	1	***	AT4G25660.1	PPPDE putative thiol peptidase family protein	PF05903: PPPDE putative peptidase domain	IPR008580: PPPDE putative peptidase domain		G
LC	1B	369643402	376643402	QTL_1B_2	-	1	--*	sp|Q8FH95|RSXC_ECOL6	Electron transport complex subunit RsxC	PF01612: 3'-5' exonuclease	IPR002562: 3'-5' exonuclease domain; IPR003340: B3 DNA binding domain; IPR012337: Ribonuclease H-like domain; IPR015300: DNA-binding pseudobarrel domain	GO:0003676 MF: nucleic acid binding;GO:0003677 MF: DNA binding;GO:0006139 BP: nucleobase-containing compound metabolic process;GO:0008408 MF: 3'-5' exonuclease activity	G
LC	1B	369643402	376643402	QTL_1B_2	-	1	--*	sp|Q8FH95|RSXC_ECOL6	Electron transport complex subunit RsxC	PF01612: 3'-5' exonuclease	IPR002562: 3'-5' exonuclease domain; IPR003340: B3 DNA binding domain; IPR012337: Ribonuclease H-like domain; IPR015300: DNA-binding pseudobarrel domain	GO:0003676 MF: nucleic acid binding;GO:0003677 MF: DNA binding;GO:0006139 BP: nucleobase-containing compound metabolic process;GO:0008408 MF: 3'-5' exonuclease activity	G
LC	1B	369643402	376643402	QTL_1B_2	-	1	--*	sp|Q8FH95|RSXC_ECOL6	Electron transport complex subunit RsxC	PF01612: 3'-5' exonuclease	IPR002562: 3'-5' exonuclease domain; IPR003340: B3 DNA binding domain; IPR012337: Ribonuclease H-like domain; IPR015300: DNA-binding pseudobarrel domain	GO:0003676 MF: nucleic acid binding;GO:0003677 MF: DNA binding;GO:0006139 BP: nucleobase-containing compound metabolic process;GO:0008408 MF: 3'-5' exonuclease activity	G
LC	1B	369643402	376643402	QTL_1B_2	-	1	--*	sp|Q8FH95|RSXC_ECOL6	Electron transport complex subunit RsxC	PF01612: 3'-5' exonuclease	IPR002562: 3'-5' exonuclease domain; IPR003340: B3 DNA binding domain; IPR012337: Ribonuclease H-like domain; IPR015300: DNA-binding pseudobarrel domain	GO:0003676 MF: nucleic acid binding;GO:0003677 MF: DNA binding;GO:0006139 BP: nucleobase-containing compound metabolic process;GO:0008408 MF: 3'-5' exonuclease activity	G
LC	1B	369643402	376643402	QTL_1B_2	+	1	--*	sp|A5GVW6|RS3_SYNR3	30S ribosomal protein S3				G
LC	1B	369643402	376643402	QTL_1B_2	-	1	*-*	tr|W9SHU8|W9SHU8_9ROSA	Werner Syndrome-like exonuclease		IPR012337: Ribonuclease H-like domain	GO:0003676 MF: nucleic acid binding	TE?
LC	1B	369643402	376643402	QTL_1B_2	-	1	*-*	tr|M8BU25|M8BU25_AEGTA	Protein FAR1-RELATED SEQUENCE 5		IPR007527: Zinc finger, SWIM-type	GO:0008270 MF: zinc ion binding	TE
LC	1B	369643402	376643402	QTL_1B_2	-	1	*-*	tr|Q10LB0|Q10LB0_ORYSJ	Retrotransposon protein, putative, Ty3-gypsy subclass	PF00385: Chromo (CHRromatin Organisation MOdifier) domain	IPR016197: Chromo domain-like; IPR023780: Chromo domain		TE
HC	1B	369643402	376643402	QTL_1B_2	+	0	*-*	AT3G15410.2	Leucine-rich repeat (LRR) family protein	PF13855: Leucine rich repeat; PF00560: Leucine Rich Repeat	IPR001611: Leucine-rich repeat; IPR003591: Leucine-rich repeat, typical subtype; IPR032675: Leucine-rich repeat domain, L domain-like	GO:0005515 MF: protein binding	G
HC	1B	369643402	376643402	QTL_1B_2	+	1	*-*	AT3G15410.1	Leucine-rich repeat (LRR) family protein	PF13855: Leucine rich repeat; PF00560: Leucine Rich Repeat	IPR001611: Leucine-rich repeat; IPR003591: Leucine-rich repeat, typical subtype; IPR032675: Leucine-rich repeat domain, L domain-like	GO:0005515 MF: protein binding	G
LC	1B	369643402	376643402	QTL_1B_2	+	1	*-*	tr|M8BU25|M8BU25_AEGTA	Protein FAR1-RELATED SEQUENCE 5	PF03101: FAR1 DNA-binding domain; PF10551: MULE transposase domain	IPR004330: FAR1 DNA binding domain; IPR018289: MULE transposase domain		TE
LC	1B	369643402	376643402	QTL_1B_2	+	1	***	tr|W9SHU8|W9SHU8_9ROSA	Werner Syndrome-like exonuclease	PF01612: 3'-5' exonuclease	IPR002562: 3'-5' exonuclease domain; IPR012337: Ribonuclease H-like domain	GO:0003676 MF: nucleic acid binding;GO:0006139 BP: nucleobase-containing compound metabolic process;GO:0008408 MF: 3'-5' exonuclease activity	G
LC	1B	369643402	376643402	QTL_1B_2	+	1	***	tr|W9SHU8|W9SHU8_9ROSA	Werner Syndrome-like exonuclease	PF01612: 3'-5' exonuclease	IPR002562: 3'-5' exonuclease domain; IPR012337: Ribonuclease H-like domain	GO:0003676 MF: nucleic acid binding;GO:0006139 BP: nucleobase-containing compound metabolic process;GO:0008408 MF: 3'-5' exonuclease activity	G
LC	1B	369643402	376643402	QTL_1B_2	+	1	***	tr|W9SHU8|W9SHU8_9ROSA	Werner Syndrome-like exonuclease	PF01612: 3'-5' exonuclease	IPR002562: 3'-5' exonuclease domain; IPR012337: Ribonuclease H-like domain	GO:0003676 MF: nucleic acid binding;GO:0006139 BP: nucleobase-containing compound metabolic process;GO:0008408 MF: 3'-5' exonuclease activity	G
LC	1B	369643402	376643402	QTL_1B_2	-	1	--*	sp|A2BTD1|RS3_PROMS	30S ribosomal protein S3				G
LC	1B	369643402	376643402	QTL_1B_2	-	1	--*	tr|A0A1D5TGX7|A0A1D5TGX7_WHEAT	Serine/threonine-protein kinase				G
LC	1B	369643402	376643402	QTL_1B_2	-	1	--*	AT1G09060.4	JmjC domain protein JMJ24				G
HC	1B	369643402	376643402	QTL_1B_2	-	1	*-*	tr|B9IPW6|B9IPW6_POPTR	PHD finger family protein		IPR011011: Zinc finger, FYVE/PHD-type; IPR013083: Zinc finger, RING/FYVE/PHD-type		G
LC	1B	369643402	376643402	QTL_1B_2	+	1	--*	tr|Q8LNK9|Q8LNK9_ORYSJ	HAT family dimerisation domain containing protein				TE
LC	1B	369643402	376643402	QTL_1B_2	+	1	*-*	tr|A0A103XD00|A0A103XD00_CYNCS	Calcium-transporting ATPase		IPR018303: P-type ATPase, phosphorylation site; IPR023214: HAD-like domain; IPR023298: P-type ATPase, transmembrane domain; IPR023299: P-type ATPase, cytoplasmic domain N	GO:0000166 MF: nucleotide binding	G
LC	1B	369643402	376643402	QTL_1B_2	-	1	*-*	tr|A0A059LCW1|A0A059LCW1_9CHLO	Protein kinase	PF00069: Protein kinase domain	IPR000719: Protein kinase domain; IPR008271: Serine/threonine-protein kinase, active site; IPR011009: Protein kinase-like domain; IPR017441: Protein kinase, ATP binding site	GO:0004672 MF: protein kinase activity;GO:0005524 MF: ATP binding;GO:0006468 BP: protein phosphorylation	G
LC	1B	369643402	376643402	QTL_1B_2	-	1	*-*	tr|A0A059LCW1|A0A059LCW1_9CHLO	Protein kinase	PF00069: Protein kinase domain	IPR000719: Protein kinase domain; IPR008271: Serine/threonine-protein kinase, active site; IPR011009: Protein kinase-like domain; IPR017441: Protein kinase, ATP binding site	GO:0004672 MF: protein kinase activity;GO:0005524 MF: ATP binding;GO:0006468 BP: protein phosphorylation	G
LC	1B	369643402	376643402	QTL_1B_2	-	1	*-*	tr|A0A059LCW1|A0A059LCW1_9CHLO	Protein kinase	PF00069: Protein kinase domain	IPR000719: Protein kinase domain; IPR008271: Serine/threonine-protein kinase, active site; IPR011009: Protein kinase-like domain; IPR017441: Protein kinase, ATP binding site	GO:0004672 MF: protein kinase activity;GO:0005524 MF: ATP binding;GO:0006468 BP: protein phosphorylation	G
LC	1B	369643402	376643402	QTL_1B_2	+	1	--*	tr|F4JT82|F4JT82_ARATH	TIR-NBS-LRR class disease resistance protein				G
LC	1B	369643402	376643402	QTL_1B_2	+	1	*-*	tr|A0A1J3JP11|A0A1J3JP11_NOCCA	Transposon Ty3-I Gag-Pol polyprotein	PF13650: Aspartyl protease	IPR021109: Aspartic peptidase domain		TE
HC	1B	369643402	376643402	QTL_1B_2	-	1	*-*	sp|Q7MZ92|FADB_PHOLL	Fatty acid oxidation complex subunit alpha	PF16113: Enoyl-CoA hydratase/isomerase	IPR029045: ClpP/crotonase-like domain; IPR032259: Enoyl-CoA hydratase/isomerase, HIBYL-CoA-H type	GO:0003860 MF: 3-hydroxyisobutyryl-CoA hydrolase activity	G
LC	1B	369643402	376643402	QTL_1B_2	-	1	--*	sp|B4ETL6|ARNC_PROMH	Undecaprenyl-phosphate 4-deoxy-4-formamido-L-arabinose transferase				G
LC	1B	369643402	376643402	QTL_1B_2	-	1	--*	sp|P09592|POLS_EEVVT	Structural polyprotein				TE
HC	1B	369643402	376643402	QTL_1B_2	-	0	***	tr|A0A0K9NYX7|A0A0K9NYX7_ZOSMR	AT hook motif DNA-binding family protein	PF03479: Domain of unknown function (DUF296)	IPR005175: PPC domain		G
HC	1B	369643402	376643402	QTL_1B_2	-	1	***	tr|A0A0K9NYX7|A0A0K9NYX7_ZOSMR	AT hook motif DNA-binding family protein	PF03479: Domain of unknown function (DUF296)	IPR005175: PPC domain		G
LC	1B	369643402	376643402	QTL_1B_2	-	1	--*	AT3G54780.5	Zinc finger (C3HC4-type RING finger) family protein				TE?
LC	1B	369643402	376643402	QTL_1B_2	+	1	*-*	AT1G04910.1	O-fucosyltransferase family protein				G
LC	1B	369643402	376643402	QTL_1B_2	+	1	--*	sp|P0C6U4|R1A_CVHN2	Replicase polyprotein 1a				TE
LC	1B	369643402	376643402	QTL_1B_2	-	1	--*	tr|A0A0J8B8I8|A0A0J8B8I8_BETVU	DNA topoisomerase				G
LC	1B	369643402	376643402	QTL_1B_2	-	1	*-*	tr|A9U2F4|A9U2F4_PHYPA	Histone chaperone	PF04729: ASF1 like histone chaperone	IPR006818: Histone chaperone ASF1-like	GO:0005634 CC: nucleus;GO:0006333 BP: chromatin assembly or disassembly	G
LC	1B	369643402	376643402	QTL_1B_2	-	1	*-*	tr|A9U2F4|A9U2F4_PHYPA	Histone chaperone	PF04729: ASF1 like histone chaperone	IPR006818: Histone chaperone ASF1-like	GO:0005634 CC: nucleus;GO:0006333 BP: chromatin assembly or disassembly	G
HC	1B	369643402	376643402	QTL_1B_2	+	1	***	tr|Q7XBZ0|Q7XBZ0_ORYSJ	Carbohydrate kinase, putative, expressed	PF00294: pfkB family carbohydrate kinase	IPR002139: Ribokinase/fructokinase; IPR002173: Carbohydrate/puine kinase, PfkB, conserved site; IPR011611: Carbohydrate kinase PfkB; IPR029056: Ribokinase-like	GO:0004747 MF: ribokinase activity;GO:0006014 BP: D-ribose metabolic process;GO:0016773 MF: phosphotransferase activity, alcohol group as acceptor	G
HC	1B	369643402	376643402	QTL_1B_2	+	1	***	tr|Q7XBZ0|Q7XBZ0_ORYSJ	Carbohydrate kinase, putative, expressed	PF00294: pfkB family carbohydrate kinase	IPR002139: Ribokinase/fructokinase; IPR002173: Carbohydrate/puine kinase, PfkB, conserved site; IPR011611: Carbohydrate kinase PfkB; IPR029056: Ribokinase-like	GO:0004747 MF: ribokinase activity;GO:0006014 BP: D-ribose metabolic process;GO:0016773 MF: phosphotransferase activity, alcohol group as acceptor	G
HC	1B	369643402	376643402	QTL_1B_2	+	1	***	tr|Q7XBZ0|Q7XBZ0_ORYSJ	Carbohydrate kinase, putative, expressed	PF00294: pfkB family carbohydrate kinase	IPR002139: Ribokinase/fructokinase; IPR002173: Carbohydrate/puine kinase, PfkB, conserved site; IPR011611: Carbohydrate kinase PfkB; IPR029056: Ribokinase-like	GO:0004747 MF: ribokinase activity;GO:0006014 BP: D-ribose metabolic process;GO:0016773 MF: phosphotransferase activity, alcohol group as acceptor	G
HC	1B	369643402	376643402	QTL_1B_2	+	1	***	tr|A0A103YIC7|A0A103YIC7_CYNCS	AMMECR1-like protein	PF01871: AMMECR1	IPR002733: AMMECR1 domain; IPR023473: AMMECR1; IPR027485: AMMECR1, N-terminal		G
LC	1B	369643402	376643402	QTL_1B_2	+	1	--*	tr|A0A0G2T398|A0A0G2T398_9ROSI	Pentatricopeptide repeat superfamily protein				G
HC	1B	369643402	376643402	QTL_1B_2	-	1	--*	tr|A0A0B2QNY7|A0A0B2QNY7_GLYSO	6-phosphofructo-2-kinase/fructose-2, 6-bisphosphatase				G
LC	1B	369643402	376643402	QTL_1B_2	+	1	--*	AT5G22460.3	alpha/beta-Hydrolases superfamily protein				G
LC	1B	369643402	376643402	QTL_1B_2	+	1	--*	AT4G12790.6	P-loop containing nucleoside triphosphate hydrolases superfamily protein				G
LC	1B	369643402	376643402	QTL_1B_2	-	1	***	AT1G33710.1	RNA-directed DNA polymerase (reverse transcriptase)-related family protein	PF13966: zinc-binding in reverse transcriptase	IPR026960: Reverse transcriptase zinc-binding domain		TE
LC	1B	369643402	376643402	QTL_1B_2	-	1	*-*	tr|Q75J38|Q75J38_ORYSJ	Retrotransposon protein, putative, LINE subclass				TE
LC	1B	369643402	376643402	QTL_1B_2	-	1	*-*	tr|A0A1J3EJP2|A0A1J3EJP2_NOCCA	LINE-1 retrotransposable element ORF2 protein	PF00078: Reverse transcriptase (RNA-dependent DNA polymerase)	IPR000477: Reverse transcriptase domain		TE
LC	1B	369643402	376643402	QTL_1B_2	-	1	*-*	tr|Q10D55|Q10D55_ORYSJ	Retrotransposon protein, putative, unclassified		IPR005135: Endonuclease/exonuclease/phosphatase		TE
HC	1B	369643402	376643402	QTL_1B_2	-	1	*-*	tr|M8BLX2|M8BLX2_AEGTA	28 kDa ribonucleoprotein, chloroplastic				G
LC	1B	369643402	376643402	QTL_1B_2	-	1	*-*	tr|M7ZMS7|M7ZMS7_TRIUA	Retrovirus-related Pol polyprotein LINE-1	PF00078: Reverse transcriptase (RNA-dependent DNA polymerase)	IPR000477: Reverse transcriptase domain		TE
LC	1B	369643402	376643402	QTL_1B_2	-	1	*-*	tr|M7ZQ80|M7ZQ80_TRIUA	Fidgetin-like protein 1				G
HC	1B	369643402	376643402	QTL_1B_2	+	1	***	tr|G7IB92|G7IB92_MEDTR	Abscisic acid receptor	PF10604: Polyketide cyclase / dehydrase and lipid transport	IPR019587: Polyketide cyclase/dehydrase; IPR023393: START-like domain		G
LC	1B	369643402	376643402	QTL_1B_2	+	1	***	tr|Q49KC7|Q49KC7_PEA	Transposase				TE
LC	1B	369643402	376643402	QTL_1B_2	+	1	*-*	tr|Q2QYB5|Q2QYB5_ORYSJ	Transposon protein, putative, Mariner sub-class				TE
LC	1B	369643402	376643402	QTL_1B_2	-	1	*-*	tr|A0A072VGJ8|A0A072VGJ8_MEDTR	Endonuclease/exonuclease/phosphatase family protein		IPR005135: Endonuclease/exonuclease/phosphatase		TE?
LC	1B	369643402	376643402	QTL_1B_2	-	1	***	tr|Q2R0R0|Q2R0R0_ORYSJ	Transposon protein, putative, CACTA, En/Spm sub-class	PF13963: Transposase-associated domain; PF02992: Transposase family tnp2; PF13960: Domain of unknown function (DUF4218); PF13952: Domain of unknown function (DUF4216)	IPR004242: Transposon, En/Spm-like; IPR025312: Domain of unknown function DUF4216; IPR025452: Domain of unknown function DUF4218; IPR029480: Transposase-associated domain		TE
LC	1B	369643402	376643402	QTL_1B_2	-	1	*-*	tr|A0A151SRU5|A0A151SRU5_CAJCA	Retrovirus-related Pol polyprotein LINE-1				TE
LC	1B	369643402	376643402	QTL_1B_2	-	0	--*	sp|B0BTH4|LGT_ACTPJ	Prolipoprotein diacylglyceryl transferase				G
LC	1B	369643402	376643402	QTL_1B_2	-	1	--*	sp|B0BTH4|LGT_ACTPJ	Prolipoprotein diacylglyceryl transferase				G
HC	1B	369643402	376643402	QTL_1B_2	-	1	*-*	tr|B9S3M9|B9S3M9_RICCO	Heat shock 70 kDa protein, putative	PF00012: Hsp70 protein	IPR013126: Heat shock protein 70 family; IPR018181: Heat shock protein 70, conserved site		G
HC	1B	369643402	376643402	QTL_1B_2	-	1	***	tr|B1N662|B1N662_SOLLC	Mitochondrial carrier protein	PF00153: Mitochondrial carrier protein	IPR018108: Mitochondrial substrate/solute carrier; IPR023395: Mitochondrial carrier domain		G
HC	1B	369643402	376643402	QTL_1B_2	-	1	***	tr|B1N662|B1N662_SOLLC	Mitochondrial carrier protein	PF00153: Mitochondrial carrier protein	IPR002030: Mitochondrial brown fat uncoupling protein; IPR018108: Mitochondrial substrate/solute carrier; IPR023395: Mitochondrial carrier domain	GO:0006839 BP: mitochondrial transport;GO:0031966 CC: mitochondrial membrane	G
HC	1B	369643402	376643402	QTL_1B_2	-	1	***	tr|B1N662|B1N662_SOLLC	Mitochondrial carrier protein	PF00153: Mitochondrial carrier protein	IPR002030: Mitochondrial brown fat uncoupling protein; IPR018108: Mitochondrial substrate/solute carrier; IPR023395: Mitochondrial carrier domain	GO:0006839 BP: mitochondrial transport;GO:0031966 CC: mitochondrial membrane	G
LC	1B	369643402	376643402	QTL_1B_2	+	1	*-*	tr|Q338Z2|Q338Z2_ORYSJ	Retrotransposon protein, putative, unclassified	PF03372: Endonuclease/Exonuclease/phosphatase family	IPR005135: Endonuclease/exonuclease/phosphatase		TE
LC	1B	369643402	376643402	QTL_1B_2	+	1	--*	AT3G51150.5	ATP binding microtubule motor family protein	PF06839: GRF zinc finger	IPR010666: Zinc finger, GRF-type	GO:0008270 MF: zinc ion binding	G
LC	1B	369643402	376643402	QTL_1B_2	+	1	*-*	tr|Q2HS45|Q2HS45_MEDTR	RNA-directed DNA polymerase (Reverse transcriptase)				TE
LC	1B	369643402	376643402	QTL_1B_2	+	1	*-*	AT2G04420.1	Polynucleotidyl transferase, ribonuclease H-like superfamily protein	PF13456: Reverse transcriptase-like	IPR012337: Ribonuclease H-like domain	GO:0003676 MF: nucleic acid binding	TE
HC	1B	369643402	376643402	QTL_1B_2	+	1	***	AT1G22140.3	zinc finger CCCH domain protein	PF16543: DRG Family Regulatory Proteins, Tma46	IPR032378: ZC3H15/TMA46 family, C-terminal		G
HC	1B	369643402	376643402	QTL_1B_2	-	1	***	tr|A0A1E5VNP6|A0A1E5VNP6_9POAL	60S ribosomal export protein NMD3	PF04981: NMD3 family	IPR007064: NMD3		G
HC	1B	369643402	376643402	QTL_1B_2	+	1	***	tr|A0A1I9LT82|A0A1I9LT82_ARATH	Zinc finger MYM-type-like protein	PF14291: Domain of unknown function (DUF4371)	IPR006580: Zinc finger, TTF-type; IPR012337: Ribonuclease H-like domain; IPR025398: Domain of unknown function DUF4371	GO:0003676 MF: nucleic acid binding	TE
LC	1B	369643402	376643402	QTL_1B_2	+	1	--*	tr|A0A1J3E6F5|A0A1J3E6F5_NOCCA	Disease resistance protein RPS5				G
HC	1B	369643402	376643402	QTL_1B_2	-	1	***	tr|A0A1D1Y6B1|A0A1D1Y6B1_9ARAE	Nuclear control of ATPase protein 2	PF08637: ATP synthase regulation protein NCA2	IPR013946: Nuclear control of ATP synthase 2		G
LC	1B	369643402	376643402	QTL_1B_2	+	1	*-*	tr|A0A151SK87|A0A151SK87_CAJCA	Retrovirus-related Pol polyprotein from transposon TNT 1-94	PF00665: Integrase core domain	IPR001584: Integrase, catalytic core; IPR012337: Ribonuclease H-like domain	GO:0003676 MF: nucleic acid binding;GO:0015074 BP: DNA integration	TE
LC	1B	369643402	376643402	QTL_1B_2	+	1	*-*	tr|A0A151SK87|A0A151SK87_CAJCA	Retrovirus-related Pol polyprotein from transposon TNT 1-94	PF00665: Integrase core domain	IPR001584: Integrase, catalytic core; IPR012337: Ribonuclease H-like domain	GO:0003676 MF: nucleic acid binding;GO:0015074 BP: DNA integration	TE
LC	1B	369643402	376643402	QTL_1B_2	+	1	--*	tr|A0A0J8B8I8|A0A0J8B8I8_BETVU	DNA topoisomerase				G
LC	1B	369643402	376643402	QTL_1B_2	-	1	*-*	tr|Q10LP8|Q10LP8_ORYSJ	Retrotransposon protein, putative, unclassified				TE
LC	1B	369643402	376643402	QTL_1B_2	-	1	*-*	tr|A0A072U7W0|A0A072U7W0_MEDTR	Endonuclease/exonuclease/phosphatase family protein		IPR005135: Endonuclease/exonuclease/phosphatase		TE?
HC	1B	369643402	376643402	QTL_1B_2	+	1	*-*	tr|Q2QZV1|Q2QZV1_ORYSJ	Retrotransposon protein, putative, unclassified	PF00078: Reverse transcriptase (RNA-dependent DNA polymerase); PF13966: zinc-binding in reverse transcriptase	IPR000477: Reverse transcriptase domain; IPR026960: Reverse transcriptase zinc-binding domain		TE
HC	1B	369643402	376643402	QTL_1B_2	-	1	***	tr|A0A0K9Q3Y0|A0A0K9Q3Y0_ZOSMR	Armadillo repeat-containing protein	PF00514: Armadillo/beta-catenin-like repeat	IPR000225: Armadillo; IPR011989: Armadillo-like helical; IPR016024: Armadillo-type fold	GO:0005488 MF: binding;GO:0005515 MF: protein binding	G
HC	1B	369643402	376643402	QTL_1B_2	-	1	***	tr|A0A0K9Q3Y0|A0A0K9Q3Y0_ZOSMR	Armadillo repeat-containing protein	PF00514: Armadillo/beta-catenin-like repeat	IPR000225: Armadillo; IPR011989: Armadillo-like helical; IPR016024: Armadillo-type fold	GO:0005488 MF: binding;GO:0005515 MF: protein binding	G
LC	1B	369643402	376643402	QTL_1B_2	+	1	*-*	AT2G35420.1	RING/U-box superfamily protein	PF13639: Ring finger domain	IPR001841: Zinc finger, RING-type; IPR013083: Zinc finger, RING/FYVE/PHD-type	GO:0005515 MF: protein binding;GO:0008270 MF: zinc ion binding	G
LC	1B	369643402	376643402	QTL_1B_2	+	1	*-*	AT2G35420.1	RING/U-box superfamily protein	PF13639: Ring finger domain	IPR001841: Zinc finger, RING-type; IPR013083: Zinc finger, RING/FYVE/PHD-type	GO:0005515 MF: protein binding;GO:0008270 MF: zinc ion binding	G
HC	1B	369643402	376643402	QTL_1B_2	-	1	*-*	tr|B9T608|B9T608_RICCO	Replication factor C subunit, putative		IPR008921: DNA polymerase III, clamp loader complex, gamma/delta/delta subunit, C-terminal; IPR027417: P-loop containing nucleoside triphosphate hydrolase	GO:0003677 MF: DNA binding;GO:0006260 BP: DNA replication	G
HC	1B	369643402	376643402	QTL_1B_2	-	1	*-*	tr|B9T608|B9T608_RICCO	Replication factor C subunit, putative		IPR008921: DNA polymerase III, clamp loader complex, gamma/delta/delta subunit, C-terminal; IPR027417: P-loop containing nucleoside triphosphate hydrolase	GO:0003677 MF: DNA binding;GO:0006260 BP: DNA replication	G
LC	1B	369643402	376643402	QTL_1B_2	-	1	*-*	tr|Q7Y0B2|Q7Y0B2_ORYSJ	K-exchanger, putative, expressed				G
HC	1B	369643402	376643402	QTL_1B_2	-	1	***	tr|B4FJ79|B4FJ79_MAIZE	PLATZ transcription factor	PF04640: PLATZ transcription factor	IPR006734: Protein of unknown function DUF597		G
LC	1B	369643402	376643402	QTL_1B_2	+	1	*-*	tr|Q2QLW7|Q2QLW7_ORYSJ	Retrotransposon protein, putative, unclassified				TE
LC	1B	369643402	376643402	QTL_1B_2	-	1	*-*	tr|A0A0E0D8F6|A0A0E0D8F6_9ORYZ	RNA helicase	PF00271: Helicase conserved C-terminal domain	IPR001650: Helicase, C-terminal; IPR027417: P-loop containing nucleoside triphosphate hydrolase		TE?
LC	1B	369643402	376643402	QTL_1B_2	+	1	*-*	tr|A0A072TRK8|A0A072TRK8_MEDTR	Ubiquitin carboxyl-terminal hydrolase	PF00443: Ubiquitin carboxyl-terminal hydrolase	IPR001394: Peptidase C19, ubiquitin carboxyl-terminal hydrolase; IPR018200: Ubiquitin specific protease, conserved site; IPR028889: Ubiquitin specific protease domain	GO:0006511 BP: ubiquitin-dependent protein catabolic process;GO:0016579 BP: protein deubiquitination;GO:0036459 MF: thiol-dependent ubiquitinyl hydrolase activity	G
LC	1B	369643402	376643402	QTL_1B_2	+	1	*-*	tr|A0A072TRK8|A0A072TRK8_MEDTR	Ubiquitin carboxyl-terminal hydrolase	PF00443: Ubiquitin carboxyl-terminal hydrolase	IPR001394: Peptidase C19, ubiquitin carboxyl-terminal hydrolase; IPR018200: Ubiquitin specific protease, conserved site; IPR028889: Ubiquitin specific protease domain	GO:0006511 BP: ubiquitin-dependent protein catabolic process;GO:0016579 BP: protein deubiquitination;GO:0036459 MF: thiol-dependent ubiquitinyl hydrolase activity	G
LC	1B	369643402	376643402	QTL_1B_2	+	1	*-*	tr|A0A072TRK8|A0A072TRK8_MEDTR	Ubiquitin carboxyl-terminal hydrolase	PF00443: Ubiquitin carboxyl-terminal hydrolase	IPR001394: Peptidase C19, ubiquitin carboxyl-terminal hydrolase; IPR018200: Ubiquitin specific protease, conserved site; IPR028889: Ubiquitin specific protease domain	GO:0006511 BP: ubiquitin-dependent protein catabolic process;GO:0016579 BP: protein deubiquitination;GO:0036459 MF: thiol-dependent ubiquitinyl hydrolase activity	G
HC	1B	369643402	376643402	QTL_1B_2	+	0	*-*	tr|A0A072UHZ2|A0A072UHZ2_MEDTR	Ubiquitin carboxyl-terminal hydrolase-like protein	PF00443: Ubiquitin carboxyl-terminal hydrolase	IPR001394: Peptidase C19, ubiquitin carboxyl-terminal hydrolase; IPR018200: Ubiquitin specific protease, conserved site; IPR028889: Ubiquitin specific protease domain	GO:0006511 BP: ubiquitin-dependent protein catabolic process;GO:0016579 BP: protein deubiquitination;GO:0036459 MF: thiol-dependent ubiquitinyl hydrolase activity	G
HC	1B	369643402	376643402	QTL_1B_2	+	0	*-*	tr|A0A072UHZ2|A0A072UHZ2_MEDTR	Ubiquitin carboxyl-terminal hydrolase-like protein	PF00443: Ubiquitin carboxyl-terminal hydrolase	IPR001394: Peptidase C19, ubiquitin carboxyl-terminal hydrolase; IPR018200: Ubiquitin specific protease, conserved site; IPR028889: Ubiquitin specific protease domain	GO:0006511 BP: ubiquitin-dependent protein catabolic process;GO:0016579 BP: protein deubiquitination;GO:0036459 MF: thiol-dependent ubiquitinyl hydrolase activity	G
HC	1B	369643402	376643402	QTL_1B_2	+	0	*-*	tr|A0A072UHZ2|A0A072UHZ2_MEDTR	Ubiquitin carboxyl-terminal hydrolase-like protein	PF00443: Ubiquitin carboxyl-terminal hydrolase	IPR001394: Peptidase C19, ubiquitin carboxyl-terminal hydrolase; IPR018200: Ubiquitin specific protease, conserved site; IPR028889: Ubiquitin specific protease domain	GO:0006511 BP: ubiquitin-dependent protein catabolic process;GO:0016579 BP: protein deubiquitination;GO:0036459 MF: thiol-dependent ubiquitinyl hydrolase activity	G
HC	1B	369643402	376643402	QTL_1B_2	+	1	*-*	tr|A0A072UHZ2|A0A072UHZ2_MEDTR	Ubiquitin carboxyl-terminal hydrolase-like protein	PF00443: Ubiquitin carboxyl-terminal hydrolase	IPR001394: Peptidase C19, ubiquitin carboxyl-terminal hydrolase; IPR018200: Ubiquitin specific protease, conserved site; IPR028889: Ubiquitin specific protease domain	GO:0006511 BP: ubiquitin-dependent protein catabolic process;GO:0016579 BP: protein deubiquitination;GO:0036459 MF: thiol-dependent ubiquitinyl hydrolase activity	G
HC	1B	369643402	376643402	QTL_1B_2	+	1	*-*	tr|A0A072UHZ2|A0A072UHZ2_MEDTR	Ubiquitin carboxyl-terminal hydrolase-like protein	PF00443: Ubiquitin carboxyl-terminal hydrolase	IPR001394: Peptidase C19, ubiquitin carboxyl-terminal hydrolase; IPR018200: Ubiquitin specific protease, conserved site; IPR028889: Ubiquitin specific protease domain	GO:0006511 BP: ubiquitin-dependent protein catabolic process;GO:0016579 BP: protein deubiquitination;GO:0036459 MF: thiol-dependent ubiquitinyl hydrolase activity	G
HC	1B	369643402	376643402	QTL_1B_2	+	1	*-*	tr|A0A072UHZ2|A0A072UHZ2_MEDTR	Ubiquitin carboxyl-terminal hydrolase-like protein	PF00443: Ubiquitin carboxyl-terminal hydrolase	IPR001394: Peptidase C19, ubiquitin carboxyl-terminal hydrolase; IPR018200: Ubiquitin specific protease, conserved site; IPR028889: Ubiquitin specific protease domain	GO:0006511 BP: ubiquitin-dependent protein catabolic process;GO:0016579 BP: protein deubiquitination;GO:0036459 MF: thiol-dependent ubiquitinyl hydrolase activity	G
HC	1B	369643402	376643402	QTL_1B_2	-	1	*-*	tr|A0A0K9Q1P3|A0A0K9Q1P3_ZOSMR	ADP-ribosylation factor GTPase-activating protein	PF01412: Putative GTPase activating protein for Arf	IPR001164: Arf GTPase activating protein	GO:0005096 MF: GTPase activator activity	G
LC	1B	369643402	376643402	QTL_1B_2	+	1	*-*	AT3G60710.1	F-box family protein		IPR001810: F-box domain; IPR032675: Leucine-rich repeat domain, L domain-like	GO:0005515 MF: protein binding	TE?
LC	1B	369643402	376643402	QTL_1B_2	-	1	*-*	tr|W6FHL7|W6FHL7_9ROSA	Dehydration responsive element binding transcription factor	PF00847: AP2 domain	IPR001471: AP2/ERF domain; IPR016177: DNA-binding domain; IPR017392: AP2/ERF transcription factor ERF/PTI6	GO:0003677 MF: DNA binding;GO:0003700 MF: transcription factor activity, sequence-specific DNA binding;GO:0006355 BP: regulation of transcription, DNA-templated	G
LC	1B	369643402	376643402	QTL_1B_2	-	1	*-*	tr|W6FHL7|W6FHL7_9ROSA	Dehydration responsive element binding transcription factor	PF00847: AP2 domain	IPR001471: AP2/ERF domain; IPR016177: DNA-binding domain; IPR017392: AP2/ERF transcription factor ERF/PTI6	GO:0003677 MF: DNA binding;GO:0003700 MF: transcription factor activity, sequence-specific DNA binding;GO:0006355 BP: regulation of transcription, DNA-templated	G
LC	1B	369643402	376643402	QTL_1B_2	-	1	*-*	tr|W6FHL7|W6FHL7_9ROSA	Dehydration responsive element binding transcription factor	PF00847: AP2 domain	IPR001471: AP2/ERF domain; IPR016177: DNA-binding domain; IPR017392: AP2/ERF transcription factor ERF/PTI6	GO:0003677 MF: DNA binding;GO:0003700 MF: transcription factor activity, sequence-specific DNA binding;GO:0006355 BP: regulation of transcription, DNA-templated	G
LC	1B	369643402	376643402	QTL_1B_2	-	1	--*	tr|K8EZ83|K8EZ83_9CHLO	Cleft lip and palate transmembrane protein 1-like protein				G
LC	1B	369643402	376643402	QTL_1B_2	-	1	--*	sp|Q7S724|CPD1_NEUCR	2',3'-cyclic-nucleotide 3'-phosphodiesterase				G
LC	1B	369643402	376643402	QTL_1B_2	-	1	*-*	tr|S5R947|S5R947_9ROSA	NAC domain protein	PF02365: No apical meristem (NAM) protein	IPR003441: NAC domain	GO:0003677 MF: DNA binding;GO:0006355 BP: regulation of transcription, DNA-templated	G
LC	1B	369643402	376643402	QTL_1B_2	-	1	*-*	tr|S5R947|S5R947_9ROSA	NAC domain protein	PF02365: No apical meristem (NAM) protein	IPR003441: NAC domain	GO:0003677 MF: DNA binding;GO:0006355 BP: regulation of transcription, DNA-templated	G
LC	1B	369643402	376643402	QTL_1B_2	-	1	*-*	tr|A0A103XKK0|A0A103XKK0_CYNCS	Aminotransferase-like, plant mobile domain-containing protein				TE
LC	1B	369643402	376643402	QTL_1B_2	-	1	--*	tr|A0A160DE96|A0A160DE96_9CAUD	Minor tail protein	PF16594: Putative AtpZ or ATP-synthase-associated	IPR032238: Putative ATP-synthase-associated protein		G
HC	1B	369643402	376643402	QTL_1B_2	+	1	***	tr|G7KF32|G7KF32_MEDTR	Basic helix loop helix (BHLH) family transcription factor	PF14215: bHLH-MYC and R2R3-MYB transcription factors N-terminal; PF00010: Helix-loop-helix DNA-binding domain	IPR011598: Myc-type, basic helix-loop-helix (bHLH) domain; IPR025610: Transcription factor MYC/MYB N-terminal	GO:0046983 MF: protein dimerization activity	G
LC	1B	369643402	376643402	QTL_1B_2	-	1	--*	sp|Q8NCA9|ZN784_HUMAN	Zinc finger protein 784				TE?
HC	1B	369643402	376643402	QTL_1B_2	-	1	*-*	tr|A8JGS9|A8JGS9_CHLRE	DnaJ-like protein	PF14237: Domain of unknown function (DUF4339); PF00226: DnaJ domain	IPR001623: DnaJ domain; IPR011989: Armadillo-like helical; IPR016024: Armadillo-type fold; IPR025640: Domain of unknown function DUF4339	GO:0005488 MF: binding	G
LC	2A	375613997	382613997	QTL_2A_1	+	1	***	tr|A0A060A5N8|A0A060A5N8_BOENI	NAC domain-containing protein	PF02365: No apical meristem (NAM) protein	IPR003441: NAC domain	GO:0003677 MF: DNA binding;GO:0006355 BP: regulation of transcription, DNA-templated	G
LC	2A	375613997	382613997	QTL_2A_1	+	1	***	tr|A0A060A5N8|A0A060A5N8_BOENI	NAC domain-containing protein	PF02365: No apical meristem (NAM) protein	IPR003441: NAC domain	GO:0003677 MF: DNA binding;GO:0006355 BP: regulation of transcription, DNA-templated	G
LC	2A	375613997	382613997	QTL_2A_1	-	1	--*	sp|Q9VAZ3|OR98A_DROME	Odorant receptor 98a				G
HC	2A	375613997	382613997	QTL_2A_1	-	1	*-*	tr|A0A061EA75|A0A061EA75_THECC	GCK domain-containing protein	PF07802: GCK domain	IPR012891: GCK		G
LC	2A	375613997	382613997	QTL_2A_1	+	1	--*	sp|P19771|YIA1_MYCTX	Insertion element IS986 uncharacterized 8.2 kDa protein				G
HC	2A	375613997	382613997	QTL_2A_1	+	1	*-*	tr|A0A0K9PMQ3|A0A0K9PMQ3_ZOSMR	RNA-binding protein	PF00076: RNA recognition motif. (a.k.a. RRM, RBD, or RNP domain)	IPR000504: RNA recognition motif domain	GO:0003676 MF: nucleic acid binding	G
HC	2A	375613997	382613997	QTL_2A_1	-	1	***	tr|A0A103XH13|A0A103XH13_CYNCS	TatD family	PF01026: TatD related DNase	IPR001130: TatD family; IPR032466: Metal-dependent hydrolase	GO:0016788 MF: hydrolase activity, acting on ester bonds	G
LC	2A	375613997	382613997	QTL_2A_1	-	1	--*	AT1G67530.4	ARM repeat superfamily protein				G
LC	2A	375613997	382613997	QTL_2A_1	-	1	--*	AT1G28090.5	Polynucleotide adenylyltransferase family protein				G
HC	2A	375613997	382613997	QTL_2A_1	+	1	***	tr|A0A199V864|A0A199V864_ANACO	Ribosome maturation factor RimP	PF02576: Putative ribosome maturation factor RimP	IPR003728: Ribosome maturation factor RimP	GO:0042274 BP: ribosomal small subunit biogenesis	G
HC	2A	375613997	382613997	QTL_2A_1	-	1	-**	tr|A0A1J3CZD8|A0A1J3CZD8_NOCCA	D-amino acid dehydrogenase	PF01266: FAD dependent oxidoreductase	IPR006076: FAD dependent oxidoreductase; IPR023753: FAD/NAD(P)-binding domain	GO:0016491 MF: oxidoreductase activity;GO:0055114 BP: oxidation-reduction process	G
HC	2A	375613997	382613997	QTL_2A_1	-	1	-**	tr|A0A1J3CZD8|A0A1J3CZD8_NOCCA	D-amino acid dehydrogenase	PF01266: FAD dependent oxidoreductase	IPR006076: FAD dependent oxidoreductase; IPR023753: FAD/NAD(P)-binding domain	GO:0016491 MF: oxidoreductase activity;GO:0055114 BP: oxidation-reduction process	G
HC	2A	375613997	382613997	QTL_2A_1	-	1	--*	sp|Q5HBL2|EFP_EHRRW	Elongation factor P				G
LC	2A	375613997	382613997	QTL_2A_1	+	1	--*	AT1G68940.3	Armadillo/beta-catenin-like repeat family protein	PF13456: Reverse transcriptase-like			TE?
LC	2A	375613997	382613997	QTL_2A_1	+	1	--*	AT4G29090.1	Ribonuclease H-like superfamily protein				TE
LC	2A	375613997	382613997	QTL_2A_1	-	1	--*	AT4G12610.2	transcription initiation factor IIF subunit alpha RAP74				G
LC	2A	375613997	382613997	QTL_2A_1	-	1	--*	tr|A0A0B2QE18|A0A0B2QE18_GLYSO	Serine/threonine-protein phosphatase 7 long form like	PF10536: Plant mobile domain	IPR019557: Aminotransferase-like, plant mobile domain		TE?
LC	2A	375613997	382613997	QTL_2A_1	-	1	*-*	tr|A2Q338|A2Q338_MEDTR	RNA-directed DNA polymerase (Reverse transcriptase)				TE
LC	2A	375613997	382613997	QTL_2A_1	-	1	***	AT3G24255.5	RNA-directed DNA polymerase (reverse transcriptase)-related family protein	PF13966: zinc-binding in reverse transcriptase	IPR026960: Reverse transcriptase zinc-binding domain		TE
LC	2A	375613997	382613997	QTL_2A_1	+	1	*-*	tr|A0A1I9LT82|A0A1I9LT82_ARATH	Zinc finger MYM-type-like protein	PF14291: Domain of unknown function (DUF4371)	IPR025398: Domain of unknown function DUF4371		TE?
HC	2A	375613997	382613997	QTL_2A_1	+	1	*-*	AT4G10200.2	TTF-type zinc finger protein with HAT dimerization domain-containing protein	PF05699: hAT family C-terminal dimerisation region	IPR008906: HAT, C-terminal dimerisation domain	GO:0046983 MF: protein dimerization activity	TE
HC	2A	375613997	382613997	QTL_2A_1	+	0	***	AT4G14970.3	fanconi anemia group D2 protein	PF14631: Fanconi anaemia protein FancD2 nuclease	IPR011989: Armadillo-like helical; IPR016024: Armadillo-type fold; IPR029448: Fanconi anaemia protein FANCD2	GO:0005488 MF: binding;GO:0006281 BP: DNA repair	G
HC	2A	375613997	382613997	QTL_2A_1	+	0	***	AT4G14970.3	fanconi anemia group D2 protein	PF14631: Fanconi anaemia protein FancD2 nuclease	IPR011989: Armadillo-like helical; IPR016024: Armadillo-type fold; IPR029448: Fanconi anaemia protein FANCD2	GO:0005488 MF: binding;GO:0006281 BP: DNA repair	G
HC	2A	375613997	382613997	QTL_2A_1	+	0	***	AT4G14970.3	fanconi anemia group D2 protein	PF14631: Fanconi anaemia protein FancD2 nuclease	IPR016024: Armadillo-type fold; IPR029448: Fanconi anaemia protein FANCD2	GO:0005488 MF: binding;GO:0006281 BP: DNA repair	G
HC	2A	375613997	382613997	QTL_2A_1	+	0	***	AT4G14970.3	fanconi anemia group D2 protein	PF14631: Fanconi anaemia protein FancD2 nuclease	IPR016024: Armadillo-type fold; IPR029448: Fanconi anaemia protein FANCD2	GO:0005488 MF: binding;GO:0006281 BP: DNA repair	G
HC	2A	375613997	382613997	QTL_2A_1	+	0	***	AT4G14970.3	fanconi anemia group D2 protein	PF14631: Fanconi anaemia protein FancD2 nuclease	IPR016024: Armadillo-type fold; IPR029448: Fanconi anaemia protein FANCD2	GO:0005488 MF: binding;GO:0006281 BP: DNA repair	G
HC	2A	375613997	382613997	QTL_2A_1	+	0	***	AT4G14970.3	fanconi anemia group D2 protein	PF14631: Fanconi anaemia protein FancD2 nuclease	IPR016024: Armadillo-type fold; IPR029448: Fanconi anaemia protein FANCD2	GO:0005488 MF: binding;GO:0006281 BP: DNA repair	G
HC	2A	375613997	382613997	QTL_2A_1	+	1	***	AT4G14970.3	fanconi anemia group D2 protein	PF14631: Fanconi anaemia protein FancD2 nuclease	IPR016024: Armadillo-type fold; IPR029448: Fanconi anaemia protein FANCD2	GO:0005488 MF: binding;GO:0006281 BP: DNA repair	G
HC	2A	375613997	382613997	QTL_2A_1	+	1	***	AT4G14970.3	fanconi anemia group D2 protein	PF14631: Fanconi anaemia protein FancD2 nuclease	IPR016024: Armadillo-type fold; IPR029448: Fanconi anaemia protein FANCD2	GO:0005488 MF: binding;GO:0006281 BP: DNA repair	G
HC	2A	375613997	382613997	QTL_2A_1	-	1	-**	AT3G52420.1	outer envelope membrane protein 7				G
LC	2A	375613997	382613997	QTL_2A_1	-	1	***	tr|Q2RB42|Q2RB42_ORYSJ	Transposon protein, putative, Mutator sub-class	PF10551: MULE transposase domain; PF04434: SWIM zinc finger	IPR006564: Zinc finger, PMZ-type; IPR007527: Zinc finger, SWIM-type; IPR018289: MULE transposase domain	GO:0008270 MF: zinc ion binding	TE
HC	2A	375613997	382613997	QTL_2A_1	+	1	***	tr|A0A0B2ST43|A0A0B2ST43_GLYSO	Werner Syndrome-like exonuclease	PF01612: 3'-5' exonuclease	IPR002562: 3'-5' exonuclease domain; IPR012337: Ribonuclease H-like domain	GO:0003676 MF: nucleic acid binding;GO:0006139 BP: nucleobase-containing compound metabolic process;GO:0008408 MF: 3'-5' exonuclease activity	G
HC	2A	375613997	382613997	QTL_2A_1	+	1	***	tr|A0A0B2ST43|A0A0B2ST43_GLYSO	Werner Syndrome-like exonuclease	PF01612: 3'-5' exonuclease	IPR002562: 3'-5' exonuclease domain; IPR012337: Ribonuclease H-like domain	GO:0003676 MF: nucleic acid binding;GO:0006139 BP: nucleobase-containing compound metabolic process;GO:0008408 MF: 3'-5' exonuclease activity	G
HC	2A	375613997	382613997	QTL_2A_1	+	1	***	tr|A0A0B2ST43|A0A0B2ST43_GLYSO	Werner Syndrome-like exonuclease	PF01612: 3'-5' exonuclease	IPR002562: 3'-5' exonuclease domain; IPR012337: Ribonuclease H-like domain	GO:0003676 MF: nucleic acid binding;GO:0006139 BP: nucleobase-containing compound metabolic process;GO:0008408 MF: 3'-5' exonuclease activity	G
LC	2A	375613997	382613997	QTL_2A_1	-	1	*-*	tr|A0A061FM96|A0A061FM96_THECC	Alpha/beta-Hydrolases superfamily protein, putative				G
HC	2A	375613997	382613997	QTL_2A_1	+	1	--*	tr|A0A103YKA8|A0A103YKA8_CYNCS	Thymidine kinase	PF00265: Thymidine kinase	IPR001267: Thymidine kinase	GO:0004797 MF: thymidine kinase activity;GO:0005524 MF: ATP binding	G
HC	2A	375613997	382613997	QTL_2A_1	+	1	--*	tr|A0A103YKA8|A0A103YKA8_CYNCS	Thymidine kinase	PF00265: Thymidine kinase	IPR001267: Thymidine kinase	GO:0004797 MF: thymidine kinase activity;GO:0005524 MF: ATP binding	G
LC	2A	375613997	382613997	QTL_2A_1	-	1	--*	AT4G29090.1	Ribonuclease H-like superfamily protein				TE
LC	2A	375613997	382613997	QTL_2A_1	+	1	*-*	tr|M7ZMS7|M7ZMS7_TRIUA	Retrovirus-related Pol polyprotein LINE-1	PF00078: Reverse transcriptase (RNA-dependent DNA polymerase)	IPR000477: Reverse transcriptase domain		TE
LC	2A	375613997	382613997	QTL_2A_1	+	1	*-*	sp|P0C6U3|R1A_CVHN1	Replicase polyprotein 1a		IPR015943: WD40/YVTN repeat-like-containing domain	GO:0005515 MF: protein binding	TE
LC	2A	375613997	382613997	QTL_2A_1	-	1	*-*	tr|M8CJZ3|M8CJZ3_AEGTA	Protein FAR1-RELATED SEQUENCE 5	PF03101: FAR1 DNA-binding domain	IPR004330: FAR1 DNA binding domain		TE
HC	2A	375613997	382613997	QTL_2A_1	-	1	***	tr|S5YYY6|S5YYY6_NARTA	9-cis-epoxycarotenoid dioxygenase	PF03055: Retinal pigment epithelial membrane protein	IPR004294: Carotenoid oxygenase	GO:0016702 MF: oxidoreductase activity, acting on single donors with incorporation of molecular oxygen, incorporation of two atoms of oxygen;GO:0055114 BP: oxidation-reduction process	G
HC	2A	375613997	382613997	QTL_2A_1	-	1	***	tr|S5YYY6|S5YYY6_NARTA	9-cis-epoxycarotenoid dioxygenase	PF03055: Retinal pigment epithelial membrane protein	IPR004294: Carotenoid oxygenase	GO:0016702 MF: oxidoreductase activity, acting on single donors with incorporation of molecular oxygen, incorporation of two atoms of oxygen;GO:0055114 BP: oxidation-reduction process	G
LC	2A	375613997	382613997	QTL_2A_1	-	1	--*	sp|Q749L1|CYCC_GEOSL	C-type polyheme cytochrome OmcC				G
LC	2A	375613997	382613997	QTL_2A_1	-	1	*-*	tr|Q2QUC2|Q2QUC2_ORYSJ	Retrotransposon protein, putative, unclassified				TE
HC	2A	375613997	382613997	QTL_2A_1	+	1	--*	sp|Q47M80|ATPA_THEFY	ATP synthase subunit alpha				G
LC	2A	375613997	382613997	QTL_2A_1	-	1	--*	tr|A0A1I9LLV6|A0A1I9LLV6_ARATH	Villin 3				G
LC	2A	375613997	382613997	QTL_2A_1	+	1	*-*	AT1G49180.1	protein kinase family protein	PF00069: Protein kinase domain; PF09425: Divergent CCT motif	IPR000719: Protein kinase domain; IPR011009: Protein kinase-like domain; IPR018467: CO/COL/TOC1, conserved site	GO:0004672 MF: protein kinase activity;GO:0005524 MF: ATP binding;GO:0006468 BP: protein phosphorylation	G
LC	2A	375613997	382613997	QTL_2A_1	+	1	*-*	AT1G49180.1	protein kinase family protein	PF00069: Protein kinase domain; PF09425: Divergent CCT motif	IPR000719: Protein kinase domain; IPR011009: Protein kinase-like domain; IPR018467: CO/COL/TOC1, conserved site	GO:0004672 MF: protein kinase activity;GO:0005524 MF: ATP binding;GO:0006468 BP: protein phosphorylation	G
LC	2A	375613997	382613997	QTL_2A_1	+	1	*-*	AT1G49180.1	protein kinase family protein	PF00069: Protein kinase domain; PF09425: Divergent CCT motif	IPR000719: Protein kinase domain; IPR011009: Protein kinase-like domain; IPR018467: CO/COL/TOC1, conserved site	GO:0004672 MF: protein kinase activity;GO:0005524 MF: ATP binding;GO:0006468 BP: protein phosphorylation	G
HC	2A	375613997	382613997	QTL_2A_1	-	1	***	tr|A0A0B0NM49|A0A0B0NM49_GOSAR	Peroxisomal (S)-2-hydroxy-acid oxidase	PF01070: FMN-dependent dehydrogenase	IPR000262: FMN-dependent dehydrogenase; IPR008259: FMN-dependent alpha-hydroxy acid dehydrogenase, active site; IPR012133: Alpha-hydroxy acid dehydrogenase, FMN-dependent; IPR013785: Aldolase-type TIM barrel	GO:0003824 MF: catalytic activity;GO:0010181 MF: FMN binding;GO:0016491 MF: oxidoreductase activity;GO:0055114 BP: oxidation-reduction process	G
HC	2A	375613997	382613997	QTL_2A_1	-	1	***	tr|A0A0B0NM49|A0A0B0NM49_GOSAR	Peroxisomal (S)-2-hydroxy-acid oxidase	PF01070: FMN-dependent dehydrogenase	IPR000262: FMN-dependent dehydrogenase; IPR008259: FMN-dependent alpha-hydroxy acid dehydrogenase, active site; IPR012133: Alpha-hydroxy acid dehydrogenase, FMN-dependent; IPR013785: Aldolase-type TIM barrel	GO:0003824 MF: catalytic activity;GO:0010181 MF: FMN binding;GO:0016491 MF: oxidoreductase activity;GO:0055114 BP: oxidation-reduction process	G
HC	2A	375613997	382613997	QTL_2A_1	-	1	***	tr|A0A0B0NM49|A0A0B0NM49_GOSAR	Peroxisomal (S)-2-hydroxy-acid oxidase	PF01070: FMN-dependent dehydrogenase	IPR000262: FMN-dependent dehydrogenase; IPR008259: FMN-dependent alpha-hydroxy acid dehydrogenase, active site; IPR012133: Alpha-hydroxy acid dehydrogenase, FMN-dependent; IPR013785: Aldolase-type TIM barrel	GO:0003824 MF: catalytic activity;GO:0010181 MF: FMN binding;GO:0016491 MF: oxidoreductase activity;GO:0055114 BP: oxidation-reduction process	G
HC	2A	375613997	382613997	QTL_2A_1	-	1	***	tr|A0A0B0NM49|A0A0B0NM49_GOSAR	Peroxisomal (S)-2-hydroxy-acid oxidase	PF01070: FMN-dependent dehydrogenase	IPR000262: FMN-dependent dehydrogenase; IPR008259: FMN-dependent alpha-hydroxy acid dehydrogenase, active site; IPR012133: Alpha-hydroxy acid dehydrogenase, FMN-dependent; IPR013785: Aldolase-type TIM barrel	GO:0003824 MF: catalytic activity;GO:0010181 MF: FMN binding;GO:0016491 MF: oxidoreductase activity;GO:0055114 BP: oxidation-reduction process	G
HC	2A	375613997	382613997	QTL_2A_1	-	0	***	tr|A0A0B0NM49|A0A0B0NM49_GOSAR	Peroxisomal (S)-2-hydroxy-acid oxidase	PF01070: FMN-dependent dehydrogenase	IPR000262: FMN-dependent dehydrogenase; IPR008259: FMN-dependent alpha-hydroxy acid dehydrogenase, active site; IPR012133: Alpha-hydroxy acid dehydrogenase, FMN-dependent; IPR013785: Aldolase-type TIM barrel	GO:0003824 MF: catalytic activity;GO:0010181 MF: FMN binding;GO:0016491 MF: oxidoreductase activity;GO:0055114 BP: oxidation-reduction process	G
HC	2A	375613997	382613997	QTL_2A_1	-	0	***	tr|A0A0B0NM49|A0A0B0NM49_GOSAR	Peroxisomal (S)-2-hydroxy-acid oxidase	PF01070: FMN-dependent dehydrogenase	IPR000262: FMN-dependent dehydrogenase; IPR008259: FMN-dependent alpha-hydroxy acid dehydrogenase, active site; IPR012133: Alpha-hydroxy acid dehydrogenase, FMN-dependent; IPR013785: Aldolase-type TIM barrel	GO:0003824 MF: catalytic activity;GO:0010181 MF: FMN binding;GO:0016491 MF: oxidoreductase activity;GO:0055114 BP: oxidation-reduction process	G
HC	2A	375613997	382613997	QTL_2A_1	-	0	***	tr|A0A0B0NM49|A0A0B0NM49_GOSAR	Peroxisomal (S)-2-hydroxy-acid oxidase	PF01070: FMN-dependent dehydrogenase	IPR000262: FMN-dependent dehydrogenase; IPR008259: FMN-dependent alpha-hydroxy acid dehydrogenase, active site; IPR012133: Alpha-hydroxy acid dehydrogenase, FMN-dependent; IPR013785: Aldolase-type TIM barrel	GO:0003824 MF: catalytic activity;GO:0010181 MF: FMN binding;GO:0016491 MF: oxidoreductase activity;GO:0055114 BP: oxidation-reduction process	G
HC	2A	375613997	382613997	QTL_2A_1	-	0	***	tr|A0A0B0NM49|A0A0B0NM49_GOSAR	Peroxisomal (S)-2-hydroxy-acid oxidase	PF01070: FMN-dependent dehydrogenase	IPR000262: FMN-dependent dehydrogenase; IPR008259: FMN-dependent alpha-hydroxy acid dehydrogenase, active site; IPR012133: Alpha-hydroxy acid dehydrogenase, FMN-dependent; IPR013785: Aldolase-type TIM barrel	GO:0003824 MF: catalytic activity;GO:0010181 MF: FMN binding;GO:0016491 MF: oxidoreductase activity;GO:0055114 BP: oxidation-reduction process	G
LC	2A	375613997	382613997	QTL_2A_1	-	1	--*	AT3G01990.9	ACT domain repeat 6				G
HC	2A	375613997	382613997	QTL_2A_1	-	1	***	tr|A0A1E5VTI0|A0A1E5VTI0_9POAL	Peroxisomal membrane protein 13				G
HC	2A	375613997	382613997	QTL_2A_1	+	1	***	tr|A7VM19|A7VM19_MARPO	Receptor-like kinase	PF08263: Leucine rich repeat N-terminal domain; PF13855: Leucine rich repeat; PF00069: Protein kinase domain	IPR000719: Protein kinase domain; IPR001611: Leucine-rich repeat; IPR003591: Leucine-rich repeat, typical subtype; IPR008271: Serine/threonine-protein kinase, active site; IPR011009: Protein kinase-like domain; IPR013210: Leucine-rich repeat-containing N-terminal, plant-type; IPR017441: Protein kinase, ATP binding site; IPR032675: Leucine-rich repeat domain, L domain-like	GO:0004672 MF: protein kinase activity;GO:0005515 MF: protein binding;GO:0005524 MF: ATP binding;GO:0006468 BP: protein phosphorylation	G
HC	2A	375613997	382613997	QTL_2A_1	+	1	***	tr|A7VM19|A7VM19_MARPO	Receptor-like kinase	PF08263: Leucine rich repeat N-terminal domain; PF13855: Leucine rich repeat; PF00069: Protein kinase domain	IPR000719: Protein kinase domain; IPR001611: Leucine-rich repeat; IPR003591: Leucine-rich repeat, typical subtype; IPR008271: Serine/threonine-protein kinase, active site; IPR011009: Protein kinase-like domain; IPR013210: Leucine-rich repeat-containing N-terminal, plant-type; IPR017441: Protein kinase, ATP binding site; IPR032675: Leucine-rich repeat domain, L domain-like	GO:0004672 MF: protein kinase activity;GO:0005515 MF: protein binding;GO:0005524 MF: ATP binding;GO:0006468 BP: protein phosphorylation	G
HC	2A	375613997	382613997	QTL_2A_1	+	1	***	tr|A7VM19|A7VM19_MARPO	Receptor-like kinase	PF08263: Leucine rich repeat N-terminal domain; PF13855: Leucine rich repeat; PF00069: Protein kinase domain	IPR000719: Protein kinase domain; IPR001611: Leucine-rich repeat; IPR003591: Leucine-rich repeat, typical subtype; IPR008271: Serine/threonine-protein kinase, active site; IPR011009: Protein kinase-like domain; IPR013210: Leucine-rich repeat-containing N-terminal, plant-type; IPR017441: Protein kinase, ATP binding site; IPR032675: Leucine-rich repeat domain, L domain-like	GO:0004672 MF: protein kinase activity;GO:0005515 MF: protein binding;GO:0005524 MF: ATP binding;GO:0006468 BP: protein phosphorylation	G
HC	2A	375613997	382613997	QTL_2A_1	+	1	***	tr|A7VM19|A7VM19_MARPO	Receptor-like kinase	PF08263: Leucine rich repeat N-terminal domain; PF13855: Leucine rich repeat; PF00069: Protein kinase domain	IPR000719: Protein kinase domain; IPR001611: Leucine-rich repeat; IPR003591: Leucine-rich repeat, typical subtype; IPR008271: Serine/threonine-protein kinase, active site; IPR011009: Protein kinase-like domain; IPR013210: Leucine-rich repeat-containing N-terminal, plant-type; IPR017441: Protein kinase, ATP binding site; IPR032675: Leucine-rich repeat domain, L domain-like	GO:0004672 MF: protein kinase activity;GO:0005515 MF: protein binding;GO:0005524 MF: ATP binding;GO:0006468 BP: protein phosphorylation	G
LC	2A	375613997	382613997	QTL_2A_1	-	1	*-*	tr|Q2QSD3|Q2QSD3_ORYSJ	Retrotransposon protein, putative, unclassified	PF03372: Endonuclease/Exonuclease/phosphatase family	IPR005135: Endonuclease/exonuclease/phosphatase		TE
HC	2A	375613997	382613997	QTL_2A_1	-	1	***	tr|C0PGB1|C0PGB1_MAIZE	TCP transcription factor	PF03634: TCP family transcription factor	IPR005333: Transcription factor, TCP; IPR017887: Transcription factor TCP subgroup; IPR017888: CYC/TB1, R domain		G
LC	2A	375613997	382613997	QTL_2A_1	-	1	*-*	tr|A0A072TJY9|A0A072TJY9_MEDTR	Endonuclease/exonuclease/phosphatase family protein		IPR005135: Endonuclease/exonuclease/phosphatase		TE?
LC	2A	375613997	382613997	QTL_2A_1	-	1	--*	sp|P29728|OAS2_HUMAN	2'-5'-oligoadenylate synthase 2				G
LC	2A	375613997	382613997	QTL_2A_1	+	1	*-*	tr|Q2QRJ0|Q2QRJ0_ORYSJ	Retrotransposon protein, putative, unclassified	PF13966: zinc-binding in reverse transcriptase	IPR026960: Reverse transcriptase zinc-binding domain		TE
LC	2A	375613997	382613997	QTL_2A_1	+	1	*-*	tr|Q2QLW7|Q2QLW7_ORYSJ	Retrotransposon protein, putative, unclassified				TE
HC	2A	375613997	382613997	QTL_2A_1	+	1	***	tr|Q53KL9|Q53KL9_ORYSJ	Retrotransposon protein, putative, unclassified	PF13966: zinc-binding in reverse transcriptase; PF13456: Reverse transcriptase-like	IPR012337: Ribonuclease H-like domain; IPR026960: Reverse transcriptase zinc-binding domain	GO:0003676 MF: nucleic acid binding	TE
HC	2A	375613997	382613997	QTL_2A_1	-	1	*-*	tr|A0A1D5WDZ0|A0A1D5WDZ0_WHEAT	Auxin response factor	PF06507: Auxin response factor	IPR010525: Auxin response factor	GO:0003677 MF: DNA binding;GO:0005634 CC: nucleus;GO:0006355 BP: regulation of transcription, DNA-templated;GO:0009725 BP: response to hormone	G
HC	2A	375613997	382613997	QTL_2A_1	-	1	*-*	tr|A0A1D5WDZ0|A0A1D5WDZ0_WHEAT	Auxin response factor	PF06507: Auxin response factor	IPR010525: Auxin response factor	GO:0003677 MF: DNA binding;GO:0005634 CC: nucleus;GO:0006355 BP: regulation of transcription, DNA-templated;GO:0009725 BP: response to hormone	G
HC	2A	375613997	382613997	QTL_2A_1	-	1	*-*	tr|A0A1D5WDZ0|A0A1D5WDZ0_WHEAT	Auxin response factor	PF06507: Auxin response factor	IPR010525: Auxin response factor	GO:0003677 MF: DNA binding;GO:0005634 CC: nucleus;GO:0006355 BP: regulation of transcription, DNA-templated;GO:0009725 BP: response to hormone	G
HC	2A	375613997	382613997	QTL_2A_1	-	1	*-*	tr|A0A1D5WDZ0|A0A1D5WDZ0_WHEAT	Auxin response factor	PF06507: Auxin response factor	IPR010525: Auxin response factor	GO:0003677 MF: DNA binding;GO:0005634 CC: nucleus;GO:0006355 BP: regulation of transcription, DNA-templated;GO:0009725 BP: response to hormone	G
LC	2A	375613997	382613997	QTL_2A_1	+	1	--*	tr|A0A1E5UMS4|A0A1E5UMS4_9POAL	AAA-ATPase				G
LC	2A	375613997	382613997	QTL_2A_1	+	1	--*	tr|A0A1E5VFR5|A0A1E5VFR5_9POAL	AAA-ATPase				G
LC	2A	375613997	382613997	QTL_2A_1	+	1	***	tr|Q5MJ26|Q5MJ26_PENAM	Low temperature and salt responsive protein	PF01679: Proteolipid membrane potential modulator	IPR000612: Proteolipid membrane potential modulator	GO:0016021 CC: integral component of membrane	G
HC	2A	375613997	382613997	QTL_2A_1	-	1	***	tr|A0A199USM3|A0A199USM3_ANACO	Melanoma-associated antigen G1	PF01454: MAGE family	IPR002190: MAGE homology domain		G
LC	2A	375613997	382613997	QTL_2A_1	+	1	***	tr|Q6UJY6|Q6UJY6_TRITU	Far1-like	PF03101: FAR1 DNA-binding domain; PF10551: MULE transposase domain	IPR004330: FAR1 DNA binding domain; IPR018289: MULE transposase domain		TE
LC	2A	375613997	382613997	QTL_2A_1	+	1	***	tr|W9SHU8|W9SHU8_9ROSA	Werner Syndrome-like exonuclease	PF01612: 3'-5' exonuclease	IPR002562: 3'-5' exonuclease domain; IPR012337: Ribonuclease H-like domain	GO:0003676 MF: nucleic acid binding;GO:0006139 BP: nucleobase-containing compound metabolic process;GO:0008408 MF: 3'-5' exonuclease activity	G
LC	2A	375613997	382613997	QTL_2A_1	+	1	***	tr|W9SHU8|W9SHU8_9ROSA	Werner Syndrome-like exonuclease	PF01612: 3'-5' exonuclease	IPR002562: 3'-5' exonuclease domain; IPR012337: Ribonuclease H-like domain	GO:0003676 MF: nucleic acid binding;GO:0006139 BP: nucleobase-containing compound metabolic process;GO:0008408 MF: 3'-5' exonuclease activity	G
LC	2A	375613997	382613997	QTL_2A_1	+	1	***	tr|W9SHU8|W9SHU8_9ROSA	Werner Syndrome-like exonuclease	PF01612: 3'-5' exonuclease	IPR002562: 3'-5' exonuclease domain; IPR012337: Ribonuclease H-like domain	GO:0003676 MF: nucleic acid binding;GO:0006139 BP: nucleobase-containing compound metabolic process;GO:0008408 MF: 3'-5' exonuclease activity	G
LC	2A	375613997	382613997	QTL_2A_1	-	1	--*	tr|A0A061R5W1|A0A061R5W1_9CHLO	Voltage-gated potassium channel				G
HC	2A	375613997	382613997	QTL_2A_1	+	1	--*	sp|P15381|CAC1C_RABIT	Voltage-dependent L-type calcium channel subunit alpha-1C				G
HC	2A	375613997	382613997	QTL_2A_1	-	0	***	tr|A0A0K9P6N2|A0A0K9P6N2_ZOSMR	Transporter	PF00083: Sugar (and other) transporter	IPR003663: Sugar/inositol transporter; IPR005828: Major facilitator, sugar transporter-like; IPR005829: Sugar transporter, conserved site; IPR020846: Major facilitator superfamily domain	GO:0005215 MF: transporter activity;GO:0016020 CC: membrane;GO:0016021 CC: integral component of membrane;GO:0022857 MF: transmembrane transporter activity;GO:0022891 MF: substrate-specific transmembrane transporter activity;GO:0055085 BP: transmembrane transport	G
HC	2A	375613997	382613997	QTL_2A_1	-	0	***	tr|A0A0K9P6N2|A0A0K9P6N2_ZOSMR	Transporter	PF00083: Sugar (and other) transporter	IPR003663: Sugar/inositol transporter; IPR005828: Major facilitator, sugar transporter-like; IPR005829: Sugar transporter, conserved site; IPR020846: Major facilitator superfamily domain	GO:0005215 MF: transporter activity;GO:0016020 CC: membrane;GO:0016021 CC: integral component of membrane;GO:0022857 MF: transmembrane transporter activity;GO:0022891 MF: substrate-specific transmembrane transporter activity;GO:0055085 BP: transmembrane transport	G
HC	2A	375613997	382613997	QTL_2A_1	-	0	***	tr|A0A0K9P6N2|A0A0K9P6N2_ZOSMR	Transporter	PF00083: Sugar (and other) transporter	IPR003663: Sugar/inositol transporter; IPR005828: Major facilitator, sugar transporter-like; IPR005829: Sugar transporter, conserved site; IPR020846: Major facilitator superfamily domain	GO:0005215 MF: transporter activity;GO:0016020 CC: membrane;GO:0016021 CC: integral component of membrane;GO:0022857 MF: transmembrane transporter activity;GO:0022891 MF: substrate-specific transmembrane transporter activity;GO:0055085 BP: transmembrane transport	G
HC	2A	375613997	382613997	QTL_2A_1	-	0	***	tr|A0A0K9P6N2|A0A0K9P6N2_ZOSMR	Transporter	PF00083: Sugar (and other) transporter	IPR003663: Sugar/inositol transporter; IPR005828: Major facilitator, sugar transporter-like; IPR005829: Sugar transporter, conserved site; IPR020846: Major facilitator superfamily domain	GO:0005215 MF: transporter activity;GO:0016020 CC: membrane;GO:0016021 CC: integral component of membrane;GO:0022857 MF: transmembrane transporter activity;GO:0022891 MF: substrate-specific transmembrane transporter activity;GO:0055085 BP: transmembrane transport	G
HC	2A	375613997	382613997	QTL_2A_1	-	0	***	tr|A0A0K9P6N2|A0A0K9P6N2_ZOSMR	Transporter	PF00083: Sugar (and other) transporter	IPR003663: Sugar/inositol transporter; IPR005828: Major facilitator, sugar transporter-like; IPR005829: Sugar transporter, conserved site; IPR020846: Major facilitator superfamily domain	GO:0005215 MF: transporter activity;GO:0016020 CC: membrane;GO:0016021 CC: integral component of membrane;GO:0022857 MF: transmembrane transporter activity;GO:0022891 MF: substrate-specific transmembrane transporter activity;GO:0055085 BP: transmembrane transport	G
HC	2A	375613997	382613997	QTL_2A_1	-	0	***	tr|A0A0K9P6N2|A0A0K9P6N2_ZOSMR	Transporter	PF00083: Sugar (and other) transporter	IPR003663: Sugar/inositol transporter; IPR005828: Major facilitator, sugar transporter-like; IPR005829: Sugar transporter, conserved site; IPR020846: Major facilitator superfamily domain	GO:0005215 MF: transporter activity;GO:0016020 CC: membrane;GO:0016021 CC: integral component of membrane;GO:0022857 MF: transmembrane transporter activity;GO:0022891 MF: substrate-specific transmembrane transporter activity;GO:0055085 BP: transmembrane transport	G
HC	2A	375613997	382613997	QTL_2A_1	-	1	***	tr|A0A0K9P6N2|A0A0K9P6N2_ZOSMR	Transporter	PF00083: Sugar (and other) transporter	IPR003663: Sugar/inositol transporter; IPR005828: Major facilitator, sugar transporter-like; IPR005829: Sugar transporter, conserved site; IPR020846: Major facilitator superfamily domain	GO:0005215 MF: transporter activity;GO:0016020 CC: membrane;GO:0016021 CC: integral component of membrane;GO:0022857 MF: transmembrane transporter activity;GO:0022891 MF: substrate-specific transmembrane transporter activity;GO:0055085 BP: transmembrane transport	G
HC	2A	375613997	382613997	QTL_2A_1	-	1	***	tr|A0A0K9P6N2|A0A0K9P6N2_ZOSMR	Transporter	PF00083: Sugar (and other) transporter	IPR003663: Sugar/inositol transporter; IPR005828: Major facilitator, sugar transporter-like; IPR005829: Sugar transporter, conserved site; IPR020846: Major facilitator superfamily domain	GO:0005215 MF: transporter activity;GO:0016020 CC: membrane;GO:0016021 CC: integral component of membrane;GO:0022857 MF: transmembrane transporter activity;GO:0022891 MF: substrate-specific transmembrane transporter activity;GO:0055085 BP: transmembrane transport	G
HC	2A	375613997	382613997	QTL_2A_1	-	1	***	tr|A0A0K9P6N2|A0A0K9P6N2_ZOSMR	Transporter	PF00083: Sugar (and other) transporter	IPR003663: Sugar/inositol transporter; IPR005828: Major facilitator, sugar transporter-like; IPR005829: Sugar transporter, conserved site; IPR020846: Major facilitator superfamily domain	GO:0005215 MF: transporter activity;GO:0016020 CC: membrane;GO:0016021 CC: integral component of membrane;GO:0022857 MF: transmembrane transporter activity;GO:0022891 MF: substrate-specific transmembrane transporter activity;GO:0055085 BP: transmembrane transport	G
HC	2A	375613997	382613997	QTL_2A_1	-	1	***	tr|A0A0K9P6N2|A0A0K9P6N2_ZOSMR	Transporter	PF00083: Sugar (and other) transporter	IPR003663: Sugar/inositol transporter; IPR005828: Major facilitator, sugar transporter-like; IPR005829: Sugar transporter, conserved site; IPR020846: Major facilitator superfamily domain	GO:0005215 MF: transporter activity;GO:0016020 CC: membrane;GO:0016021 CC: integral component of membrane;GO:0022857 MF: transmembrane transporter activity;GO:0022891 MF: substrate-specific transmembrane transporter activity;GO:0055085 BP: transmembrane transport	G
HC	2A	375613997	382613997	QTL_2A_1	-	1	***	tr|A0A0K9P6N2|A0A0K9P6N2_ZOSMR	Transporter	PF00083: Sugar (and other) transporter	IPR003663: Sugar/inositol transporter; IPR005828: Major facilitator, sugar transporter-like; IPR005829: Sugar transporter, conserved site; IPR020846: Major facilitator superfamily domain	GO:0005215 MF: transporter activity;GO:0016020 CC: membrane;GO:0016021 CC: integral component of membrane;GO:0022857 MF: transmembrane transporter activity;GO:0022891 MF: substrate-specific transmembrane transporter activity;GO:0055085 BP: transmembrane transport	G
HC	2A	375613997	382613997	QTL_2A_1	-	1	***	tr|A0A0K9P6N2|A0A0K9P6N2_ZOSMR	Transporter	PF00083: Sugar (and other) transporter	IPR003663: Sugar/inositol transporter; IPR005828: Major facilitator, sugar transporter-like; IPR005829: Sugar transporter, conserved site; IPR020846: Major facilitator superfamily domain	GO:0005215 MF: transporter activity;GO:0016020 CC: membrane;GO:0016021 CC: integral component of membrane;GO:0022857 MF: transmembrane transporter activity;GO:0022891 MF: substrate-specific transmembrane transporter activity;GO:0055085 BP: transmembrane transport	G
LC	2A	375613997	382613997	QTL_2A_1	-	1	*-*	tr|S5R947|S5R947_9ROSA	NAC domain protein	PF02365: No apical meristem (NAM) protein	IPR003441: NAC domain	GO:0003677 MF: DNA binding;GO:0006355 BP: regulation of transcription, DNA-templated	G
LC	2A	375613997	382613997	QTL_2A_1	-	1	*-*	tr|S5R947|S5R947_9ROSA	NAC domain protein	PF02365: No apical meristem (NAM) protein	IPR003441: NAC domain	GO:0003677 MF: DNA binding;GO:0006355 BP: regulation of transcription, DNA-templated	G
LC	2A	375613997	382613997	QTL_2A_1	-	1	--*	AT4G19191.1	Tetratricopeptide repeat (TPR)-like superfamily protein				G
LC	2A	375613997	382613997	QTL_2A_1	+	1	--*	AT2G25160.2	cytochrome P450, family 82, subfamily F, polypeptide 1				G
HC	2A	375613997	382613997	QTL_2A_1	-	1	***	tr|A0A103XEV9|A0A103XEV9_CYNCS	Glutaredoxin	PF00462: Glutaredoxin	IPR002109: Glutaredoxin; IPR011905: Glutaredoxin-like, plant II; IPR012336: Thioredoxin-like fold	GO:0009055 MF: electron carrier activity;GO:0015035 MF: protein disulfide oxidoreductase activity;GO:0045454 BP: cell redox homeostasis	G
HC	2A	375613997	382613997	QTL_2A_1	-	1	***	tr|A0A103XEV9|A0A103XEV9_CYNCS	Glutaredoxin	PF00462: Glutaredoxin	IPR002109: Glutaredoxin; IPR011905: Glutaredoxin-like, plant II; IPR012336: Thioredoxin-like fold	GO:0009055 MF: electron carrier activity;GO:0015035 MF: protein disulfide oxidoreductase activity;GO:0045454 BP: cell redox homeostasis	G
HC	2A	375613997	382613997	QTL_2A_1	-	1	***	tr|A0A103XEV9|A0A103XEV9_CYNCS	Glutaredoxin	PF00462: Glutaredoxin	IPR002109: Glutaredoxin; IPR011905: Glutaredoxin-like, plant II; IPR012336: Thioredoxin-like fold	GO:0009055 MF: electron carrier activity;GO:0015035 MF: protein disulfide oxidoreductase activity;GO:0045454 BP: cell redox homeostasis	G
LC	2A	375613997	382613997	QTL_2A_1	+	1	*-*	tr|M8BU25|M8BU25_AEGTA	Protein FAR1-RELATED SEQUENCE 5		IPR007527: Zinc finger, SWIM-type	GO:0008270 MF: zinc ion binding	TE
LC	2A	375613997	382613997	QTL_2A_1	-	1	*-*	tr|G7IYD7|G7IYD7_MEDTR	O-fucosyltransferase family protein	PF10250: GDP-fucose protein O-fucosyltransferase	IPR019378: GDP-fucose protein O-fucosyltransferase		G
LC	2A	375613997	382613997	QTL_2A_1	-	0	*-*	tr|G7IYD7|G7IYD7_MEDTR	O-fucosyltransferase family protein	PF10250: GDP-fucose protein O-fucosyltransferase	IPR019378: GDP-fucose protein O-fucosyltransferase		G
LC	2A	375613997	382613997	QTL_2A_1	+	1	--*	AT1G43730.1	RNA-directed DNA polymerase (reverse transcriptase)-related family protein				TE
LC	2A	375613997	382613997	QTL_2A_1	+	1	*-*	tr|Q10IF0|Q10IF0_ORYSJ	Retrotransposon protein, putative, unclassified		IPR005135: Endonuclease/exonuclease/phosphatase		TE
LC	2A	375613997	382613997	QTL_2A_1	+	1	--*	AT2G02520.1	RNA-directed DNA polymerase (reverse transcriptase)-related family protein	PF13966: zinc-binding in reverse transcriptase	IPR026960: Reverse transcriptase zinc-binding domain		TE
LC	2A	375613997	382613997	QTL_2A_1	+	1	--*	sp|Q4JCH7|DNAG_SULAC	DNA primase DnaG				G
HC	2A	600187297	607187297	QTL_2A_2	-	1	***	tr|W9QLB4|W9QLB4_9ROSA	BTB/POZ domain-containing protein	PF02214: BTB/POZ domain	IPR000210: BTB/POZ domain; IPR003131: Potassium channel tetramerisation-type BTB domain; IPR011044: Quinoprotein amine dehydrogenase, beta chain-like; IPR011333: SKP1/BTB/POZ domain; IPR015943: WD40/YVTN repeat-like-containing domain	GO:0005515 MF: protein binding;GO:0051260 BP: protein homooligomerization	G
HC	2A	600187297	607187297	QTL_2A_2	-	1	***	tr|W9QLB4|W9QLB4_9ROSA	BTB/POZ domain-containing protein	PF02214: BTB/POZ domain	IPR000210: BTB/POZ domain; IPR003131: Potassium channel tetramerisation-type BTB domain; IPR011044: Quinoprotein amine dehydrogenase, beta chain-like; IPR011333: SKP1/BTB/POZ domain; IPR015943: WD40/YVTN repeat-like-containing domain	GO:0005515 MF: protein binding;GO:0051260 BP: protein homooligomerization	G
HC	2A	600187297	607187297	QTL_2A_2	-	0	*-*	tr|A0A1D1YV29|A0A1D1YV29_9ARAE	Sister chromatid cohesion protein PDS5 B-B		IPR011989: Armadillo-like helical; IPR016024: Armadillo-type fold	GO:0005488 MF: binding	G
HC	2A	600187297	607187297	QTL_2A_2	-	1	*-*	tr|A0A1D1YV29|A0A1D1YV29_9ARAE	Sister chromatid cohesion protein PDS5 B-B		IPR011989: Armadillo-like helical; IPR016024: Armadillo-type fold	GO:0005488 MF: binding	G
HC	2A	600187297	607187297	QTL_2A_2	-	0	*-*	tr|A0A1D1YV29|A0A1D1YV29_9ARAE	Sister chromatid cohesion protein PDS5 B-B		IPR011989: Armadillo-like helical; IPR016024: Armadillo-type fold	GO:0005488 MF: binding	G
HC	2A	600187297	607187297	QTL_2A_2	+	1	***	tr|A0A1D5T6C3|A0A1D5T6C3_WHEAT	Gamma-tubulin complex component	PF04130: Spc97 / Spc98 family	IPR007259: Gamma-tubulin complex component protein	GO:0000226 BP: microtubule cytoskeleton organization;GO:0000922 CC: spindle pole;GO:0005815 CC: microtubule organizing center;GO:0007020 BP: microtubule nucleation;GO:0043015 MF: gamma-tubulin binding	G
HC	2A	600187297	607187297	QTL_2A_2	+	1	***	tr|A0A1D5T6C3|A0A1D5T6C3_WHEAT	Gamma-tubulin complex component	PF04130: Spc97 / Spc98 family	IPR007259: Gamma-tubulin complex component protein	GO:0000226 BP: microtubule cytoskeleton organization;GO:0000922 CC: spindle pole;GO:0005815 CC: microtubule organizing center;GO:0007020 BP: microtubule nucleation;GO:0043015 MF: gamma-tubulin binding	G
HC	2A	600187297	607187297	QTL_2A_2	+	1	***	tr|A0A1D5T6C3|A0A1D5T6C3_WHEAT	Gamma-tubulin complex component	PF04130: Spc97 / Spc98 family	IPR007259: Gamma-tubulin complex component protein	GO:0000226 BP: microtubule cytoskeleton organization;GO:0000922 CC: spindle pole;GO:0005815 CC: microtubule organizing center;GO:0007020 BP: microtubule nucleation;GO:0043015 MF: gamma-tubulin binding	G
HC	2A	600187297	607187297	QTL_2A_2	+	1	***	tr|A0A1D5T6C3|A0A1D5T6C3_WHEAT	Gamma-tubulin complex component	PF04130: Spc97 / Spc98 family	IPR007259: Gamma-tubulin complex component protein	GO:0000226 BP: microtubule cytoskeleton organization;GO:0000922 CC: spindle pole;GO:0005815 CC: microtubule organizing center;GO:0007020 BP: microtubule nucleation;GO:0043015 MF: gamma-tubulin binding	G
HC	2A	600187297	607187297	QTL_2A_2	+	1	***	tr|A0A1D5T6C3|A0A1D5T6C3_WHEAT	Gamma-tubulin complex component	PF04130: Spc97 / Spc98 family	IPR007259: Gamma-tubulin complex component protein	GO:0000226 BP: microtubule cytoskeleton organization;GO:0000922 CC: spindle pole;GO:0005815 CC: microtubule organizing center;GO:0007020 BP: microtubule nucleation;GO:0043015 MF: gamma-tubulin binding	G
HC	2A	600187297	607187297	QTL_2A_2	+	1	***	AT2G32580.1	transmembrane protein, putative (DUF1068)	PF06364: Protein of unknown function (DUF1068)	IPR010471: Protein of unknown function DUF1068		G
HC	2A	600187297	607187297	QTL_2A_2	-	1	***	tr|A0A0K9PI21|A0A0K9PI21_ZOSMR	Heavy metal transport/detoxification protein	PF00403: Heavy-metal-associated domain	IPR006121: Heavy metal-associated domain, HMA	GO:0030001 BP: metal ion transport;GO:0046872 MF: metal ion binding	G
HC	2A	600187297	607187297	QTL_2A_2	-	1	***	tr|A0A0K9PI21|A0A0K9PI21_ZOSMR	Heavy metal transport/detoxification protein	PF00403: Heavy-metal-associated domain	IPR006121: Heavy metal-associated domain, HMA	GO:0030001 BP: metal ion transport;GO:0046872 MF: metal ion binding	G
LC	2A	600187297	607187297	QTL_2A_2	-	1	--*	AT4G36020.2	cold shock domain protein 1				G
LC	2A	600187297	607187297	QTL_2A_2	-	1	--*	sp|Q9JMH4|COHA1_MESAU	Collagen alpha-1(XVII) chain				G
HC	2A	600187297	607187297	QTL_2A_2	-	1	--*	AT2G30740.9	Protein kinase superfamily protein				G
HC	2A	600187297	607187297	QTL_2A_2	+	1	***	tr|Q01JX7|Q01JX7_ORYSA	B0809H07.3 protein	PF12442: Protein of unknown function (DUF3681)	IPR022149: Protein of unknown function DUF3681		G
LC	2A	600187297	607187297	QTL_2A_2	-	1	***	tr|A0A072VES6|A0A072VES6_MEDTR	Endonuclease/exonuclease/phosphatase family protein		IPR005135: Endonuclease/exonuclease/phosphatase		TE?
LC	2A	600187297	607187297	QTL_2A_2	-	1	*-*	tr|Q10IA6|Q10IA6_ORYSJ	Retrotransposon protein, putative, unclassified	PF14111: Domain of unknown function (DUF4283)	IPR025558: Domain of unknown function DUF4283		TE
HC	2A	600187297	607187297	QTL_2A_2	+	1	***	tr|A0A1D1XW60|A0A1D1XW60_9ARAE	Trafficking protein particle complex subunit 9	PF08626: Transport protein Trs120 or TRAPPC9, TRAPP II complex subunit	IPR013783: Immunoglobulin-like fold; IPR013935: TRAPP II complex, Trs120		G
HC	2A	600187297	607187297	QTL_2A_2	+	0	***	tr|A0A1D1XW60|A0A1D1XW60_9ARAE	Trafficking protein particle complex subunit 9	PF08626: Transport protein Trs120 or TRAPPC9, TRAPP II complex subunit	IPR013783: Immunoglobulin-like fold; IPR013935: TRAPP II complex, Trs120		G
HC	2A	600187297	607187297	QTL_2A_2	+	0	***	tr|A0A1D1XW60|A0A1D1XW60_9ARAE	Trafficking protein particle complex subunit 9	PF08626: Transport protein Trs120 or TRAPPC9, TRAPP II complex subunit	IPR013783: Immunoglobulin-like fold; IPR013935: TRAPP II complex, Trs120		G
HC	2A	600187297	607187297	QTL_2A_2	+	1	***	tr|A0A1E5UR64|A0A1E5UR64_9POAL	Protein ROOT PRIMORDIUM DEFECTIVE 1	PF11955: Plant organelle RNA recognition domain	IPR021099: Plant organelle RNA recognition domain		G
LC	2A	600187297	607187297	QTL_2A_2	+	1	--*	AT3G19670.3	pre-mRNA-processing protein 40B				G
HC	2A	600187297	607187297	QTL_2A_2	-	1	*-*	tr|A0A061E290|A0A061E290_THECC	Leucine-rich repeat receptor-like protein kinase family protein, putative	PF13855: Leucine rich repeat	IPR001611: Leucine-rich repeat; IPR003591: Leucine-rich repeat, typical subtype; IPR032675: Leucine-rich repeat domain, L domain-like	GO:0005515 MF: protein binding	G
HC	2A	600187297	607187297	QTL_2A_2	+	1	***	tr|A0A151TT05|A0A151TT05_CAJCA	Ergosterol biosynthetic protein 28	PF03694: Erg28 like protein	IPR005352: Erg28	GO:0016021 CC: integral component of membrane	G
LC	2A	600187297	607187297	QTL_2A_2	+	1	--*	sp|C4LC41|DER_TOLAT	GTPase Der				G
LC	2A	600187297	607187297	QTL_2A_2	+	0	*-*	tr|A0A1E5USP0|A0A1E5USP0_9POAL	Xylulose kinase	PF02782: FGGY family of carbohydrate kinases, C-terminal domain	IPR018485: Carbohydrate kinase, FGGY, C-terminal	GO:0005975 BP: carbohydrate metabolic process;GO:0016773 MF: phosphotransferase activity, alcohol group as acceptor	G
LC	2A	600187297	607187297	QTL_2A_2	+	0	*-*	tr|A0A1E5USP0|A0A1E5USP0_9POAL	Xylulose kinase	PF02782: FGGY family of carbohydrate kinases, C-terminal domain	IPR018485: Carbohydrate kinase, FGGY, C-terminal	GO:0005975 BP: carbohydrate metabolic process;GO:0016773 MF: phosphotransferase activity, alcohol group as acceptor	G
LC	2A	600187297	607187297	QTL_2A_2	-	1	-**	AT4G04650.1	RNA-directed DNA polymerase (reverse transcriptase)-related family protein	PF13966: zinc-binding in reverse transcriptase	IPR026960: Reverse transcriptase zinc-binding domain		TE
LC	2A	600187297	607187297	QTL_2A_2	+	1	*-*	tr|A0A151SA73|A0A151SA73_CAJCA	Serine/threonine protein phosphatase 7 long form isogeny	PF10536: Plant mobile domain	IPR019557: Aminotransferase-like, plant mobile domain		TE?
HC	2A	600187297	607187297	QTL_2A_2	-	1	--*	tr|Q2QXT9|Q2QXT9_ORYSJ	GRF zinc finger family protein				TE?
LC	2A	600187297	607187297	QTL_2A_2	-	1	*-*	tr|Q2QQX5|Q2QQX5_ORYSJ	Transposon protein, putative, Mutator sub-class, expressed				TE
LC	2A	600187297	607187297	QTL_2A_2	+	1	*-*	tr|Q2QQA7|Q2QQA7_ORYSJ	Transposon protein, putative, Mutator sub-class				TE
HC	2A	600187297	607187297	QTL_2A_2	+	1	***	tr|A0A0K9Q428|A0A0K9Q428_ZOSMR	Nodulin-like / Major Facilitator Superfamily protein	PF06813: Nodulin-like; PF07690: Major Facilitator Superfamily	IPR010658: Nodulin-like; IPR011701: Major facilitator superfamily; IPR020846: Major facilitator superfamily domain	GO:0016021 CC: integral component of membrane;GO:0055085 BP: transmembrane transport	G
HC	2A	600187297	607187297	QTL_2A_2	+	1	***	tr|A0A0K9Q428|A0A0K9Q428_ZOSMR	Nodulin-like / Major Facilitator Superfamily protein	PF06813: Nodulin-like; PF07690: Major Facilitator Superfamily	IPR010658: Nodulin-like; IPR011701: Major facilitator superfamily; IPR020846: Major facilitator superfamily domain	GO:0016021 CC: integral component of membrane;GO:0055085 BP: transmembrane transport	G
HC	2A	600187297	607187297	QTL_2A_2	+	1	***	tr|W9RLK8|W9RLK8_9ROSA	Calcium uptake protein 1	PF13202: EF hand; PF00036: EF hand; PF13833: EF-hand domain pair	IPR002048: EF-hand domain; IPR011992: EF-hand domain pair; IPR018247: EF-Hand 1, calcium-binding site	GO:0005509 MF: calcium ion binding	G
HC	2A	600187297	607187297	QTL_2A_2	+	1	***	tr|Q8H5Q5|Q8H5Q5_ORYSJ	Organic solute transporter-like	PF03619: Organic solute transporter Ostalpha	IPR005178: Organic solute transporter subunit alpha/Transmembrane protein 184		G
HC	2A	600187297	607187297	QTL_2A_2	-	0	***	AT4G23840.1	Leucine-rich repeat (LRR) family protein	PF13516: Leucine Rich repeat; PF13855: Leucine rich repeat	IPR001611: Leucine-rich repeat; IPR006553: Leucine-rich repeat, cysteine-containing subtype; IPR032675: Leucine-rich repeat domain, L domain-like	GO:0005515 MF: protein binding	G
HC	2A	600187297	607187297	QTL_2A_2	-	1	***	AT4G23840.1	Leucine-rich repeat (LRR) family protein	PF13516: Leucine Rich repeat; PF13855: Leucine rich repeat	IPR001611: Leucine-rich repeat; IPR006553: Leucine-rich repeat, cysteine-containing subtype; IPR032675: Leucine-rich repeat domain, L domain-like	GO:0005515 MF: protein binding	G
LC	2A	600187297	607187297	QTL_2A_2	+	1	--*	tr|G7KC30|G7KC30_MEDTR	NOP56-like pre RNA processing ribonucleoprotein	PF08156: NOP5NT (NUC127) domain	IPR012974: NOP5, N-terminal		G
HC	2A	600187297	607187297	QTL_2A_2	+	1	***	tr|A7VM39|A7VM39_MARPO	Receptor-like kinase	PF07714: Protein tyrosine kinase	IPR000719: Protein kinase domain; IPR001245: Serine-threonine/tyrosine-protein kinase, catalytic domain; IPR008271: Serine/threonine-protein kinase, active site; IPR011009: Protein kinase-like domain	GO:0004672 MF: protein kinase activity;GO:0005524 MF: ATP binding;GO:0006468 BP: protein phosphorylation	G
HC	2A	600187297	607187297	QTL_2A_2	+	1	***	tr|A7VM39|A7VM39_MARPO	Receptor-like kinase	PF07714: Protein tyrosine kinase	IPR000719: Protein kinase domain; IPR001245: Serine-threonine/tyrosine-protein kinase, catalytic domain; IPR008271: Serine/threonine-protein kinase, active site; IPR011009: Protein kinase-like domain	GO:0004672 MF: protein kinase activity;GO:0005524 MF: ATP binding;GO:0006468 BP: protein phosphorylation	G
HC	2A	600187297	607187297	QTL_2A_2	+	1	***	tr|A7VM39|A7VM39_MARPO	Receptor-like kinase	PF07714: Protein tyrosine kinase	IPR000719: Protein kinase domain; IPR001245: Serine-threonine/tyrosine-protein kinase, catalytic domain; IPR008271: Serine/threonine-protein kinase, active site; IPR011009: Protein kinase-like domain	GO:0004672 MF: protein kinase activity;GO:0005524 MF: ATP binding;GO:0006468 BP: protein phosphorylation	G
HC	2A	600187297	607187297	QTL_2A_2	+	0	***	tr|A7VM39|A7VM39_MARPO	Receptor-like kinase	PF07714: Protein tyrosine kinase	IPR000719: Protein kinase domain; IPR001245: Serine-threonine/tyrosine-protein kinase, catalytic domain; IPR011009: Protein kinase-like domain	GO:0004672 MF: protein kinase activity;GO:0005524 MF: ATP binding;GO:0006468 BP: protein phosphorylation	G
HC	2A	600187297	607187297	QTL_2A_2	+	0	***	tr|A7VM39|A7VM39_MARPO	Receptor-like kinase	PF07714: Protein tyrosine kinase	IPR000719: Protein kinase domain; IPR001245: Serine-threonine/tyrosine-protein kinase, catalytic domain; IPR011009: Protein kinase-like domain	GO:0004672 MF: protein kinase activity;GO:0005524 MF: ATP binding;GO:0006468 BP: protein phosphorylation	G
HC	2A	600187297	607187297	QTL_2A_2	+	0	***	tr|A7VM39|A7VM39_MARPO	Receptor-like kinase	PF07714: Protein tyrosine kinase	IPR000719: Protein kinase domain; IPR001245: Serine-threonine/tyrosine-protein kinase, catalytic domain; IPR011009: Protein kinase-like domain	GO:0004672 MF: protein kinase activity;GO:0005524 MF: ATP binding;GO:0006468 BP: protein phosphorylation	G
HC	2A	600187297	607187297	QTL_2A_2	+	0	***	tr|A7VM39|A7VM39_MARPO	Receptor-like kinase	PF07714: Protein tyrosine kinase	IPR000719: Protein kinase domain; IPR001245: Serine-threonine/tyrosine-protein kinase, catalytic domain; IPR011009: Protein kinase-like domain	GO:0004672 MF: protein kinase activity;GO:0005524 MF: ATP binding;GO:0006468 BP: protein phosphorylation	G
HC	2A	600187297	607187297	QTL_2A_2	+	0	***	tr|A7VM39|A7VM39_MARPO	Receptor-like kinase	PF07714: Protein tyrosine kinase	IPR000719: Protein kinase domain; IPR001245: Serine-threonine/tyrosine-protein kinase, catalytic domain; IPR011009: Protein kinase-like domain	GO:0004672 MF: protein kinase activity;GO:0005524 MF: ATP binding;GO:0006468 BP: protein phosphorylation	G
HC	2A	600187297	607187297	QTL_2A_2	+	0	***	tr|A7VM39|A7VM39_MARPO	Receptor-like kinase	PF07714: Protein tyrosine kinase	IPR000719: Protein kinase domain; IPR001245: Serine-threonine/tyrosine-protein kinase, catalytic domain; IPR011009: Protein kinase-like domain	GO:0004672 MF: protein kinase activity;GO:0005524 MF: ATP binding;GO:0006468 BP: protein phosphorylation	G
HC	2A	600187297	607187297	QTL_2A_2	-	0	***	tr|W9SG54|W9SG54_9ROSA	Dol-P-Glc:Glc(2)Man(9)GlcNAc(2)-PP-Dol alpha-1,2-glucosyltransferase	PF04922: DIE2/ALG10 family	IPR016900: Alpha-2-glucosyltransferase Alg10	GO:0004583 MF: dolichyl-phosphate-glucose-glycolipid alpha-glucosyltransferase activity;GO:0005789 CC: endoplasmic reticulum membrane;GO:0006488 BP: dolichol-linked oligosaccharide biosynthetic process	G
HC	2A	600187297	607187297	QTL_2A_2	-	0	***	tr|W9SG54|W9SG54_9ROSA	Dol-P-Glc:Glc(2)Man(9)GlcNAc(2)-PP-Dol alpha-1,2-glucosyltransferase	PF04922: DIE2/ALG10 family	IPR016900: Alpha-2-glucosyltransferase Alg10	GO:0004583 MF: dolichyl-phosphate-glucose-glycolipid alpha-glucosyltransferase activity;GO:0005789 CC: endoplasmic reticulum membrane;GO:0006488 BP: dolichol-linked oligosaccharide biosynthetic process	G
HC	2A	600187297	607187297	QTL_2A_2	-	0	***	tr|W9SG54|W9SG54_9ROSA	Dol-P-Glc:Glc(2)Man(9)GlcNAc(2)-PP-Dol alpha-1,2-glucosyltransferase	PF04922: DIE2/ALG10 family	IPR016900: Alpha-2-glucosyltransferase Alg10	GO:0004583 MF: dolichyl-phosphate-glucose-glycolipid alpha-glucosyltransferase activity;GO:0005789 CC: endoplasmic reticulum membrane;GO:0006488 BP: dolichol-linked oligosaccharide biosynthetic process	G
HC	2A	600187297	607187297	QTL_2A_2	-	0	***	tr|A0A1E5VA19|A0A1E5VA19_9POAL	Dol-P-Glc:Glc(2)Man(9)GlcNAc(2)-PP-Dol alpha-1,2-glucosyltransferase	PF04922: DIE2/ALG10 family	IPR016900: Alpha-2-glucosyltransferase Alg10	GO:0004583 MF: dolichyl-phosphate-glucose-glycolipid alpha-glucosyltransferase activity;GO:0005789 CC: endoplasmic reticulum membrane;GO:0006488 BP: dolichol-linked oligosaccharide biosynthetic process	G
HC	2A	600187297	607187297	QTL_2A_2	-	0	***	tr|A0A1E5VA19|A0A1E5VA19_9POAL	Dol-P-Glc:Glc(2)Man(9)GlcNAc(2)-PP-Dol alpha-1,2-glucosyltransferase	PF04922: DIE2/ALG10 family	IPR016900: Alpha-2-glucosyltransferase Alg10	GO:0004583 MF: dolichyl-phosphate-glucose-glycolipid alpha-glucosyltransferase activity;GO:0005789 CC: endoplasmic reticulum membrane;GO:0006488 BP: dolichol-linked oligosaccharide biosynthetic process	G
HC	2A	600187297	607187297	QTL_2A_2	-	0	***	tr|A0A1E5VA19|A0A1E5VA19_9POAL	Dol-P-Glc:Glc(2)Man(9)GlcNAc(2)-PP-Dol alpha-1,2-glucosyltransferase	PF04922: DIE2/ALG10 family	IPR016900: Alpha-2-glucosyltransferase Alg10	GO:0004583 MF: dolichyl-phosphate-glucose-glycolipid alpha-glucosyltransferase activity;GO:0005789 CC: endoplasmic reticulum membrane;GO:0006488 BP: dolichol-linked oligosaccharide biosynthetic process	G
HC	2A	600187297	607187297	QTL_2A_2	-	1	***	tr|W9SG54|W9SG54_9ROSA	Dol-P-Glc:Glc(2)Man(9)GlcNAc(2)-PP-Dol alpha-1,2-glucosyltransferase	PF04922: DIE2/ALG10 family	IPR016900: Alpha-2-glucosyltransferase Alg10	GO:0004583 MF: dolichyl-phosphate-glucose-glycolipid alpha-glucosyltransferase activity;GO:0005789 CC: endoplasmic reticulum membrane;GO:0006488 BP: dolichol-linked oligosaccharide biosynthetic process	G
HC	2A	600187297	607187297	QTL_2A_2	-	1	***	tr|W9SG54|W9SG54_9ROSA	Dol-P-Glc:Glc(2)Man(9)GlcNAc(2)-PP-Dol alpha-1,2-glucosyltransferase	PF04922: DIE2/ALG10 family	IPR016900: Alpha-2-glucosyltransferase Alg10	GO:0004583 MF: dolichyl-phosphate-glucose-glycolipid alpha-glucosyltransferase activity;GO:0005789 CC: endoplasmic reticulum membrane;GO:0006488 BP: dolichol-linked oligosaccharide biosynthetic process	G
HC	2A	600187297	607187297	QTL_2A_2	-	1	***	tr|W9SG54|W9SG54_9ROSA	Dol-P-Glc:Glc(2)Man(9)GlcNAc(2)-PP-Dol alpha-1,2-glucosyltransferase	PF04922: DIE2/ALG10 family	IPR016900: Alpha-2-glucosyltransferase Alg10	GO:0004583 MF: dolichyl-phosphate-glucose-glycolipid alpha-glucosyltransferase activity;GO:0005789 CC: endoplasmic reticulum membrane;GO:0006488 BP: dolichol-linked oligosaccharide biosynthetic process	G
HC	2A	600187297	607187297	QTL_2A_2	+	0	***	tr|M8B646|M8B646_AEGTA	Trafficking protein particle complex subunit 2	PF04628: Sedlin, N-terminal conserved region	IPR006722: Trafficking protein particle complex subunit 2; IPR011012: Longin-like domain	GO:0005622 CC: intracellular;GO:0006810 BP: transport;GO:0006888 BP: ER to Golgi vesicle-mediated transport	G
HC	2A	600187297	607187297	QTL_2A_2	+	0	***	tr|M8B646|M8B646_AEGTA	Trafficking protein particle complex subunit 2	PF04628: Sedlin, N-terminal conserved region	IPR006722: Trafficking protein particle complex subunit 2; IPR011012: Longin-like domain	GO:0005622 CC: intracellular;GO:0006810 BP: transport;GO:0006888 BP: ER to Golgi vesicle-mediated transport	G
HC	2A	600187297	607187297	QTL_2A_2	+	0	***	tr|M8B646|M8B646_AEGTA	Trafficking protein particle complex subunit 2	PF04628: Sedlin, N-terminal conserved region	IPR006722: Trafficking protein particle complex subunit 2; IPR011012: Longin-like domain	GO:0005622 CC: intracellular;GO:0006810 BP: transport;GO:0006888 BP: ER to Golgi vesicle-mediated transport	G
HC	2A	600187297	607187297	QTL_2A_2	+	1	***	tr|M8B646|M8B646_AEGTA	Trafficking protein particle complex subunit 2	PF04628: Sedlin, N-terminal conserved region	IPR006722: Trafficking protein particle complex subunit 2; IPR011012: Longin-like domain	GO:0005622 CC: intracellular;GO:0006810 BP: transport;GO:0006888 BP: ER to Golgi vesicle-mediated transport	G
HC	2A	600187297	607187297	QTL_2A_2	+	1	***	tr|M8B646|M8B646_AEGTA	Trafficking protein particle complex subunit 2	PF04628: Sedlin, N-terminal conserved region	IPR006722: Trafficking protein particle complex subunit 2; IPR011012: Longin-like domain	GO:0005622 CC: intracellular;GO:0006810 BP: transport;GO:0006888 BP: ER to Golgi vesicle-mediated transport	G
HC	2A	600187297	607187297	QTL_2A_2	+	1	***	tr|M8B646|M8B646_AEGTA	Trafficking protein particle complex subunit 2	PF04628: Sedlin, N-terminal conserved region	IPR006722: Trafficking protein particle complex subunit 2; IPR011012: Longin-like domain	GO:0005622 CC: intracellular;GO:0006810 BP: transport;GO:0006888 BP: ER to Golgi vesicle-mediated transport	G
LC	2A	600187297	607187297	QTL_2A_2	+	1	--*	sp|Q751U4|QCR7_ASHGO	Cytochrome b-c1 complex subunit 7				G
LC	2A	600187297	607187297	QTL_2A_2	+	1	--*	tr|A0A1D1YR54|A0A1D1YR54_9ARAE	Retrovirus-related Pol polyprotein from transposon TNT 1-94	PF14223: gag-polypeptide of LTR copia-type			TE
HC	2A	600187297	607187297	QTL_2A_2	+	1	***	tr|Q67G15|Q67G15_WHEAT	Adenine phosphoribosyltransferase	PF00156: Phosphoribosyl transferase domain	IPR000836: Phosphoribosyltransferase domain; IPR005764: Adenine phosphoribosyl transferase; IPR029057: Phosphoribosyltransferase-like	GO:0003999 MF: adenine phosphoribosyltransferase activity;GO:0005737 CC: cytoplasm;GO:0006168 BP: adenine salvage;GO:0009116 BP: nucleoside metabolic process	G
HC	2A	600187297	607187297	QTL_2A_2	+	1	***	tr|Q67G15|Q67G15_WHEAT	Adenine phosphoribosyltransferase	PF00156: Phosphoribosyl transferase domain	IPR000836: Phosphoribosyltransferase domain; IPR005764: Adenine phosphoribosyl transferase; IPR029057: Phosphoribosyltransferase-like	GO:0003999 MF: adenine phosphoribosyltransferase activity;GO:0005737 CC: cytoplasm;GO:0006168 BP: adenine salvage;GO:0009116 BP: nucleoside metabolic process	G
HC	2A	600187297	607187297	QTL_2A_2	+	1	***	tr|Q67G15|Q67G15_WHEAT	Adenine phosphoribosyltransferase	PF00156: Phosphoribosyl transferase domain	IPR000836: Phosphoribosyltransferase domain; IPR005764: Adenine phosphoribosyl transferase; IPR029057: Phosphoribosyltransferase-like	GO:0003999 MF: adenine phosphoribosyltransferase activity;GO:0005737 CC: cytoplasm;GO:0006168 BP: adenine salvage;GO:0009116 BP: nucleoside metabolic process	G
HC	2A	600187297	607187297	QTL_2A_2	+	1	***	tr|Q67G15|Q67G15_WHEAT	Adenine phosphoribosyltransferase	PF00156: Phosphoribosyl transferase domain	IPR000836: Phosphoribosyltransferase domain; IPR005764: Adenine phosphoribosyl transferase; IPR029057: Phosphoribosyltransferase-like	GO:0003999 MF: adenine phosphoribosyltransferase activity;GO:0005737 CC: cytoplasm;GO:0006168 BP: adenine salvage;GO:0009116 BP: nucleoside metabolic process	G
HC	2A	600187297	607187297	QTL_2A_2	-	1	--*	AT5G42400.8	SET domain protein 25				G
HC	2A	600187297	607187297	QTL_2A_2	-	1	***	tr|D8L9L2|D8L9L2_WHEAT	Tuftelin interacting protein 11 domain containing protein	PF01585: G-patch domain; PF07842: GC-rich sequence DNA-binding factor-like protein	IPR000467: G-patch domain; IPR022783: GC-rich sequence DNA-binding factor domain	GO:0003676 MF: nucleic acid binding;GO:0003677 MF: DNA binding;GO:0005634 CC: nucleus;GO:0006355 BP: regulation of transcription, DNA-templated	G
HC	2A	600187297	607187297	QTL_2A_2	-	1	***	tr|D8L9L2|D8L9L2_WHEAT	Tuftelin interacting protein 11 domain containing protein	PF01585: G-patch domain; PF07842: GC-rich sequence DNA-binding factor-like protein	IPR000467: G-patch domain; IPR022783: GC-rich sequence DNA-binding factor domain	GO:0003676 MF: nucleic acid binding;GO:0003677 MF: DNA binding;GO:0005634 CC: nucleus;GO:0006355 BP: regulation of transcription, DNA-templated	G
HC	2A	600187297	607187297	QTL_2A_2	-	1	***	tr|D8L9L2|D8L9L2_WHEAT	Tuftelin interacting protein 11 domain containing protein	PF01585: G-patch domain; PF07842: GC-rich sequence DNA-binding factor-like protein	IPR000467: G-patch domain; IPR022783: GC-rich sequence DNA-binding factor domain	GO:0003676 MF: nucleic acid binding;GO:0003677 MF: DNA binding;GO:0005634 CC: nucleus;GO:0006355 BP: regulation of transcription, DNA-templated	G
HC	2A	600187297	607187297	QTL_2A_2	-	1	***	tr|D8L9L2|D8L9L2_WHEAT	Tuftelin interacting protein 11 domain containing protein	PF01585: G-patch domain; PF07842: GC-rich sequence DNA-binding factor-like protein	IPR000467: G-patch domain; IPR022783: GC-rich sequence DNA-binding factor domain	GO:0003676 MF: nucleic acid binding;GO:0003677 MF: DNA binding;GO:0005634 CC: nucleus;GO:0006355 BP: regulation of transcription, DNA-templated	G
HC	2A	600187297	607187297	QTL_2A_2	-	0	***	tr|X5IDT0|X5IDT0_ORYSJ	Zinc finger ring-type protein	PF17123: RING-like zinc finger; PF13768: von Willebrand factor type A domain; PF14624: VWA / Hh protein intein-like	IPR001841: Zinc finger, RING-type; IPR002035: von Willebrand factor, type A; IPR013083: Zinc finger, RING/FYVE/PHD-type; IPR032838: VWA-Hint protein, Vwaint domain	GO:0005515 MF: protein binding;GO:0008270 MF: zinc ion binding	TE?
HC	2A	600187297	607187297	QTL_2A_2	-	0	***	tr|X5IDT0|X5IDT0_ORYSJ	Zinc finger ring-type protein	PF17123: RING-like zinc finger; PF13768: von Willebrand factor type A domain; PF14624: VWA / Hh protein intein-like	IPR001841: Zinc finger, RING-type; IPR002035: von Willebrand factor, type A; IPR013083: Zinc finger, RING/FYVE/PHD-type; IPR032838: VWA-Hint protein, Vwaint domain	GO:0005515 MF: protein binding;GO:0008270 MF: zinc ion binding	TE?
HC	2A	600187297	607187297	QTL_2A_2	-	1	***	tr|X5IDT0|X5IDT0_ORYSJ	Zinc finger ring-type protein	PF17123: RING-like zinc finger; PF13768: von Willebrand factor type A domain; PF14624: VWA / Hh protein intein-like	IPR001841: Zinc finger, RING-type; IPR002035: von Willebrand factor, type A; IPR013083: Zinc finger, RING/FYVE/PHD-type; IPR032838: VWA-Hint protein, Vwaint domain	GO:0005515 MF: protein binding;GO:0008270 MF: zinc ion binding	TE?
HC	2A	600187297	607187297	QTL_2A_2	-	1	***	tr|X5IDT0|X5IDT0_ORYSJ	Zinc finger ring-type protein	PF17123: RING-like zinc finger; PF13768: von Willebrand factor type A domain; PF14624: VWA / Hh protein intein-like	IPR001841: Zinc finger, RING-type; IPR002035: von Willebrand factor, type A; IPR013083: Zinc finger, RING/FYVE/PHD-type; IPR032838: VWA-Hint protein, Vwaint domain	GO:0005515 MF: protein binding;GO:0008270 MF: zinc ion binding	TE?
HC	2A	600187297	607187297	QTL_2A_2	-	1	--*	AT3G59570.2	Ypt/Rab-GAP domain of gyp1p superfamily protein				G
LC	2A	600187297	607187297	QTL_2A_2	-	1	*-*	tr|Q2QVI6|Q2QVI6_ORYSJ	Transposon protein, putative, Pong sub-class	PF04827: Plant transposon protein	IPR006912: Harbinger transposase-derived protein	GO:0016788 MF: hydrolase activity, acting on ester bonds	TE
LC	2A	600187297	607187297	QTL_2A_2	+	1	*-*	tr|A0A072U7W0|A0A072U7W0_MEDTR	Endonuclease/exonuclease/phosphatase family protein		IPR005135: Endonuclease/exonuclease/phosphatase		TE?
HC	2A	600187297	607187297	QTL_2A_2	-	1	--*	sp|P50133|PTH1R_PIG	Parathyroid hormone/parathyroid hormone-related peptide receptor				G
HC	2A	600187297	607187297	QTL_2A_2	-	1	--*	AT3G52140.4	tetratricopeptide repeat (TPR)-containing protein				G
HC	2A	600187297	607187297	QTL_2A_2	-	1	--*	sp|O43678|NDUA2_HUMAN	NADH dehydrogenase [ubiquinone] 1 alpha subcomplex subunit 2				G
LC	2A	600187297	607187297	QTL_2A_2	-	1	--*	AT1G47300.1	F-box family protein	PF00646: F-box domain	IPR001810: F-box domain	GO:0005515 MF: protein binding	TE?
HC	2A	600187297	607187297	QTL_2A_2	+	0	***	tr|A0A0K9PVT1|A0A0K9PVT1_ZOSMR	Isocitrate lyase	PF13714: Phosphoenolpyruvate phosphomutase	IPR015813: Pyruvate/Phosphoenolpyruvate kinase-like domain	GO:0003824 MF: catalytic activity	G
HC	2A	600187297	607187297	QTL_2A_2	+	1	***	tr|A0A0K9PVT1|A0A0K9PVT1_ZOSMR	Isocitrate lyase	PF13714: Phosphoenolpyruvate phosphomutase	IPR015813: Pyruvate/Phosphoenolpyruvate kinase-like domain	GO:0003824 MF: catalytic activity	G
HC	2A	600187297	607187297	QTL_2A_2	-	1	***	tr|M7YBT0|M7YBT0_TRIUA	Polyadenylate-binding protein	PF00076: RNA recognition motif. (a.k.a. RRM, RBD, or RNP domain); PF00658: Poly-adenylate binding protein, unique domain	IPR000504: RNA recognition motif domain; IPR002004: Polyadenylate-binding protein/Hyperplastic disc protein; IPR003954: RNA recognition motif domain, eukaryote; IPR006515: Polyadenylate binding protein, human types 1, 2, 3, 4	GO:0003676 MF: nucleic acid binding;GO:0003723 MF: RNA binding	G
HC	2A	600187297	607187297	QTL_2A_2	-	1	***	tr|M7YBT0|M7YBT0_TRIUA	Polyadenylate-binding protein	PF00076: RNA recognition motif. (a.k.a. RRM, RBD, or RNP domain); PF00658: Poly-adenylate binding protein, unique domain	IPR000504: RNA recognition motif domain; IPR002004: Polyadenylate-binding protein/Hyperplastic disc protein; IPR003954: RNA recognition motif domain, eukaryote; IPR006515: Polyadenylate binding protein, human types 1, 2, 3, 4	GO:0003676 MF: nucleic acid binding;GO:0003723 MF: RNA binding	G
HC	2A	600187297	607187297	QTL_2A_2	-	1	***	tr|B9H7W1|B9H7W1_POPTR	Transporter-related family protein	PF03151: Triose-phosphate Transporter family	IPR004853: Sugar phosphate transporter domain		G
HC	2A	600187297	607187297	QTL_2A_2	+	1	--*	sp|D5ANS3|BCHL_RHOCB	Light-independent protochlorophyllide reductase iron-sulfur ATP-binding protein				G
HC	2A	600187297	607187297	QTL_2A_2	+	1	*-*	AT5G61480.1	Leucine-rich repeat protein kinase family protein		IPR032675: Leucine-rich repeat domain, L domain-like		G
LC	2A	600187297	607187297	QTL_2A_2	-	1	--*	AT4G31860.3	Protein phosphatase 2C family protein				G
LC	2A	600187297	607187297	QTL_2A_2	-	1	*-*	tr|Q10IA6|Q10IA6_ORYSJ	Retrotransposon protein, putative, unclassified	PF14111: Domain of unknown function (DUF4283)	IPR025558: Domain of unknown function DUF4283		TE
HC	2A	600187297	607187297	QTL_2A_2	+	1	*-*	tr|G7L1Q2|G7L1Q2_MEDTR	Nuclear transcription factor Y subunit B	PF00808: Histone-like transcription factor (CBF/NF-Y) and archaeal histone	IPR003956: Transcription factor, NFYB/HAP3, conserved site; IPR003958: Transcription factor CBF/NF-Y/archaeal histone domain; IPR009072: Histone-fold	GO:0005634 CC: nucleus;GO:0006355 BP: regulation of transcription, DNA-templated;GO:0043565 MF: sequence-specific DNA binding;GO:0046982 MF: protein heterodimerization activity	G
HC	2A	600187297	607187297	QTL_2A_2	+	1	*-*	tr|G7L1Q2|G7L1Q2_MEDTR	Nuclear transcription factor Y subunit B	PF00808: Histone-like transcription factor (CBF/NF-Y) and archaeal histone	IPR003956: Transcription factor, NFYB/HAP3, conserved site; IPR003958: Transcription factor CBF/NF-Y/archaeal histone domain; IPR009072: Histone-fold	GO:0005634 CC: nucleus;GO:0006355 BP: regulation of transcription, DNA-templated;GO:0043565 MF: sequence-specific DNA binding;GO:0046982 MF: protein heterodimerization activity	G
HC	2A	600187297	607187297	QTL_2A_2	+	1	*-*	tr|G7L1Q2|G7L1Q2_MEDTR	Nuclear transcription factor Y subunit B	PF00808: Histone-like transcription factor (CBF/NF-Y) and archaeal histone	IPR003956: Transcription factor, NFYB/HAP3, conserved site; IPR003958: Transcription factor CBF/NF-Y/archaeal histone domain; IPR009072: Histone-fold	GO:0005634 CC: nucleus;GO:0006355 BP: regulation of transcription, DNA-templated;GO:0043565 MF: sequence-specific DNA binding;GO:0046982 MF: protein heterodimerization activity	G
HC	2A	600187297	607187297	QTL_2A_2	+	1	*-*	tr|G7L1Q2|G7L1Q2_MEDTR	Nuclear transcription factor Y subunit B	PF00808: Histone-like transcription factor (CBF/NF-Y) and archaeal histone	IPR003956: Transcription factor, NFYB/HAP3, conserved site; IPR003958: Transcription factor CBF/NF-Y/archaeal histone domain; IPR009072: Histone-fold	GO:0005634 CC: nucleus;GO:0006355 BP: regulation of transcription, DNA-templated;GO:0043565 MF: sequence-specific DNA binding;GO:0046982 MF: protein heterodimerization activity	G
HC	2A	600187297	607187297	QTL_2A_2	+	1	*-*	AT5G49770.1	Leucine-rich repeat protein kinase family protein		IPR032675: Leucine-rich repeat domain, L domain-like		G
HC	2A	600187297	607187297	QTL_2A_2	-	1	***	tr|A0A0K9PBZ9|A0A0K9PBZ9_ZOSMR	Trichome birefringence	PF14416: PMR5 N terminal Domain; PF13839: GDSL/SGNH-like Acyl-Esterase family found in Pmr5 and Cas1p	IPR025846: PMR5 N-terminal domain; IPR026057: PC-Esterase		G
HC	2A	600187297	607187297	QTL_2A_2	+	1	***	tr|B9SUC9|B9SUC9_RICCO	Receptor-kinase, putative	PF08263: Leucine rich repeat N-terminal domain; PF13855: Leucine rich repeat; PF13516: Leucine Rich repeat; PF00069: Protein kinase domain	IPR000719: Protein kinase domain; IPR001611: Leucine-rich repeat; IPR003591: Leucine-rich repeat, typical subtype; IPR008271: Serine/threonine-protein kinase, active site; IPR011009: Protein kinase-like domain; IPR013210: Leucine-rich repeat-containing N-terminal, plant-type; IPR032675: Leucine-rich repeat domain, L domain-like	GO:0004672 MF: protein kinase activity;GO:0005515 MF: protein binding;GO:0005524 MF: ATP binding;GO:0006468 BP: protein phosphorylation	G
HC	2A	600187297	607187297	QTL_2A_2	+	1	***	tr|B9SUC9|B9SUC9_RICCO	Receptor-kinase, putative	PF08263: Leucine rich repeat N-terminal domain; PF13855: Leucine rich repeat; PF13516: Leucine Rich repeat; PF00069: Protein kinase domain	IPR000719: Protein kinase domain; IPR001611: Leucine-rich repeat; IPR003591: Leucine-rich repeat, typical subtype; IPR008271: Serine/threonine-protein kinase, active site; IPR011009: Protein kinase-like domain; IPR013210: Leucine-rich repeat-containing N-terminal, plant-type; IPR032675: Leucine-rich repeat domain, L domain-like	GO:0004672 MF: protein kinase activity;GO:0005515 MF: protein binding;GO:0005524 MF: ATP binding;GO:0006468 BP: protein phosphorylation	G
HC	2A	600187297	607187297	QTL_2A_2	+	1	***	tr|B9SUC9|B9SUC9_RICCO	Receptor-kinase, putative	PF08263: Leucine rich repeat N-terminal domain; PF13855: Leucine rich repeat; PF13516: Leucine Rich repeat; PF00069: Protein kinase domain	IPR000719: Protein kinase domain; IPR001611: Leucine-rich repeat; IPR003591: Leucine-rich repeat, typical subtype; IPR008271: Serine/threonine-protein kinase, active site; IPR011009: Protein kinase-like domain; IPR013210: Leucine-rich repeat-containing N-terminal, plant-type; IPR032675: Leucine-rich repeat domain, L domain-like	GO:0004672 MF: protein kinase activity;GO:0005515 MF: protein binding;GO:0005524 MF: ATP binding;GO:0006468 BP: protein phosphorylation	G
HC	2A	600187297	607187297	QTL_2A_2	+	1	***	tr|B9SUC9|B9SUC9_RICCO	Receptor-kinase, putative	PF08263: Leucine rich repeat N-terminal domain; PF13855: Leucine rich repeat; PF13516: Leucine Rich repeat; PF00069: Protein kinase domain	IPR000719: Protein kinase domain; IPR001611: Leucine-rich repeat; IPR003591: Leucine-rich repeat, typical subtype; IPR008271: Serine/threonine-protein kinase, active site; IPR011009: Protein kinase-like domain; IPR013210: Leucine-rich repeat-containing N-terminal, plant-type; IPR032675: Leucine-rich repeat domain, L domain-like	GO:0004672 MF: protein kinase activity;GO:0005515 MF: protein binding;GO:0005524 MF: ATP binding;GO:0006468 BP: protein phosphorylation	G
LC	2A	600187297	607187297	QTL_2A_2	+	1	--*	sp|B4SR24|F16PA_STRM5	Fructose-1,6-bisphosphatase class 1				G
HC	2A	600187297	607187297	QTL_2A_2	-	1	***	AT3G50120.1	transmembrane protein, putative (DUF247)	PF03140: Plant protein of unknown function	IPR004158: Protein of unknown function DUF247, plant		G
LC	2A	600187297	607187297	QTL_2A_2	+	1	*-*	tr|Q2QUC2|Q2QUC2_ORYSJ	Retrotransposon protein, putative, unclassified	PF14111: Domain of unknown function (DUF4283); PF14392: Zinc knuckle	IPR025558: Domain of unknown function DUF4283; IPR025836: Zinc knuckle CX2CX4HX4C		TE
LC	2A	600187297	607187297	QTL_2A_2	+	1	--*	tr|I1NSG2|I1NSG2_ORYGL	DNA-(apurinic or apyrimidinic site) lyase		IPR005135: Endonuclease/exonuclease/phosphatase		TE?
HC	2A	600187297	607187297	QTL_2A_2	-	1	***	tr|A0A199VUM0|A0A199VUM0_ANACO	F-box protein	PF12937: F-box-like	IPR001810: F-box domain; IPR006553: Leucine-rich repeat, cysteine-containing subtype; IPR032675: Leucine-rich repeat domain, L domain-like	GO:0005515 MF: protein binding	TE?
LC	2A	600187297	607187297	QTL_2A_2	+	1	*-*	tr|Q2QWY8|Q2QWY8_ORYSJ	Transposon protein, putative, CACTA, En/Spm sub-class				TE
LC	2A	600187297	607187297	QTL_2A_2	+	1	*-*	tr|Q2VEY8|Q2VEY8_PENAM	Transposase	PF13359: DDE superfamily endonuclease	IPR027806: Harbinger transposase-derived nuclease domain		TE
LC	2A	600187297	607187297	QTL_2A_2	-	1	--*	AT3G59530.3	Calcium-dependent phosphotriesterase superfamily protein				G
LC	2A	600187297	607187297	QTL_2A_2	+	1	*-*	tr|A0A061GTA6|A0A061GTA6_THECC	Elongation factor 1-alpha	PF00009: Elongation factor Tu GTP binding domain	IPR000795: Transcription factor, GTP-binding domain; IPR027417: P-loop containing nucleoside triphosphate hydrolase	GO:0003924 MF: GTPase activity;GO:0005525 MF: GTP binding	G
LC	2A	600187297	607187297	QTL_2A_2	+	1	*-*	tr|A0A061GTA6|A0A061GTA6_THECC	Elongation factor 1-alpha	PF00009: Elongation factor Tu GTP binding domain	IPR000795: Transcription factor, GTP-binding domain; IPR027417: P-loop containing nucleoside triphosphate hydrolase	GO:0003924 MF: GTPase activity;GO:0005525 MF: GTP binding	G
HC	2A	600187297	607187297	QTL_2A_2	-	1	--*	tr|M8BJR6|M8BJR6_AEGTA	Cysteine-rich receptor-like protein kinase 41				G
LC	2A	600187297	607187297	QTL_2A_2	-	1	--*	AT2G27950.3	Ring/U-Box superfamily protein				G
LC	2A	600187297	607187297	QTL_2A_2	-	1	--*	AT3G20200.3	kinase with adenine nucleotide alpha hydrolases-like domain-containing protein				G
LC	2A	600187297	607187297	QTL_2A_2	-	1	*-*	tr|Q10SG1|Q10SG1_ORYSJ	Retrotransposon protein, putative, unclassified	PF04195: Putative gypsy type transposon	IPR007321: Transposase (putative), gypsy type		TE
LC	2A	600187297	607187297	QTL_2A_2	+	1	*-*	tr|A2Q1A3|A2Q1A3_MEDTR	RNA-directed DNA polymerase (Reverse transcriptase)				TE
LC	2A	600187297	607187297	QTL_2A_2	+	1	--*	AT3G24255.5	RNA-directed DNA polymerase (reverse transcriptase)-related family protein	PF13966: zinc-binding in reverse transcriptase	IPR026960: Reverse transcriptase zinc-binding domain		TE
LC	2A	600187297	607187297	QTL_2A_2	-	1	***	tr|Q6UJY6|Q6UJY6_TRITU	Far1-like	PF03101: FAR1 DNA-binding domain; PF10551: MULE transposase domain	IPR004330: FAR1 DNA binding domain; IPR018289: MULE transposase domain		TE
HC	2A	600187297	607187297	QTL_2A_2	-	1	--*	AT1G62200.3	Major facilitator superfamily protein				G
LC	2A	600187297	607187297	QTL_2A_2	+	1	--*	sp|B5DF93|PATL1_RAT	Protein PAT1 homolog 1				G
LC	2A	600187297	607187297	QTL_2A_2	-	1	--*	sp|O96006|ZBED1_HUMAN	Zinc finger BED domain-containing protein 1	PF14372: Domain of unknown function (DUF4413); PF05699: hAT family C-terminal dimerisation region	IPR008906: HAT, C-terminal dimerisation domain; IPR012337: Ribonuclease H-like domain; IPR025525: hAT-like transposase, RNase-H fold	GO:0003676 MF: nucleic acid binding;GO:0003677 MF: DNA binding;GO:0046983 MF: protein dimerization activity	TE
LC	2A	600187297	607187297	QTL_2A_2	-	1	--*	sp|O96006|ZBED1_HUMAN	Zinc finger BED domain-containing protein 1	PF14372: Domain of unknown function (DUF4413); PF05699: hAT family C-terminal dimerisation region	IPR008906: HAT, C-terminal dimerisation domain; IPR012337: Ribonuclease H-like domain; IPR025525: hAT-like transposase, RNase-H fold	GO:0003676 MF: nucleic acid binding;GO:0003677 MF: DNA binding;GO:0046983 MF: protein dimerization activity	TE
LC	2A	600187297	607187297	QTL_2A_2	-	1	--*	sp|O96006|ZBED1_HUMAN	Zinc finger BED domain-containing protein 1	PF14372: Domain of unknown function (DUF4413); PF05699: hAT family C-terminal dimerisation region	IPR008906: HAT, C-terminal dimerisation domain; IPR012337: Ribonuclease H-like domain; IPR025525: hAT-like transposase, RNase-H fold	GO:0003676 MF: nucleic acid binding;GO:0003677 MF: DNA binding;GO:0046983 MF: protein dimerization activity	TE
LC	2A	600187297	607187297	QTL_2A_2	-	1	*-*	tr|A0A061FVD3|A0A061FVD3_THECC	BED zinc finger,hAT family dimerization domain	PF02892: BED zinc finger	IPR003656: Zinc finger, BED-type; IPR012337: Ribonuclease H-like domain; IPR013087: Zinc finger C2H2-type	GO:0003676 MF: nucleic acid binding;GO:0003677 MF: DNA binding	TE
LC	2A	600187297	607187297	QTL_2A_2	-	1	*-*	tr|A0A061FVD3|A0A061FVD3_THECC	BED zinc finger,hAT family dimerization domain	PF02892: BED zinc finger	IPR003656: Zinc finger, BED-type; IPR012337: Ribonuclease H-like domain; IPR013087: Zinc finger C2H2-type	GO:0003676 MF: nucleic acid binding;GO:0003677 MF: DNA binding	TE
HC	2A	600187297	607187297	QTL_2A_2	-	1	***	tr|A0A1D5TB77|A0A1D5TB77_WHEAT	Glycosyltransferase	PF00201: UDP-glucoronosyl and UDP-glucosyl transferase	IPR002213: UDP-glucuronosyl/UDP-glucosyltransferase	GO:0008152 BP: metabolic process;GO:0016758 MF: transferase activity, transferring hexosyl groups	G
HC	2A	600187297	607187297	QTL_2A_2	-	1	***	tr|A0A1D5TB77|A0A1D5TB77_WHEAT	Glycosyltransferase	PF00201: UDP-glucoronosyl and UDP-glucosyl transferase	IPR002213: UDP-glucuronosyl/UDP-glucosyltransferase	GO:0008152 BP: metabolic process;GO:0016758 MF: transferase activity, transferring hexosyl groups	G
HC	2A	600187297	607187297	QTL_2A_2	-	1	***	tr|D7MF87|D7MF87_ARALL	Kinase family protein	PF08263: Leucine rich repeat N-terminal domain; PF00069: Protein kinase domain	IPR000719: Protein kinase domain; IPR003591: Leucine-rich repeat, typical subtype; IPR008271: Serine/threonine-protein kinase, active site; IPR011009: Protein kinase-like domain; IPR013210: Leucine-rich repeat-containing N-terminal, plant-type; IPR032675: Leucine-rich repeat domain, L domain-like	GO:0004672 MF: protein kinase activity;GO:0005524 MF: ATP binding;GO:0006468 BP: protein phosphorylation	G
HC	2A	600187297	607187297	QTL_2A_2	-	1	***	tr|D7MF87|D7MF87_ARALL	Kinase family protein	PF08263: Leucine rich repeat N-terminal domain; PF00069: Protein kinase domain	IPR000719: Protein kinase domain; IPR003591: Leucine-rich repeat, typical subtype; IPR008271: Serine/threonine-protein kinase, active site; IPR011009: Protein kinase-like domain; IPR013210: Leucine-rich repeat-containing N-terminal, plant-type; IPR032675: Leucine-rich repeat domain, L domain-like	GO:0004672 MF: protein kinase activity;GO:0005524 MF: ATP binding;GO:0006468 BP: protein phosphorylation	G
HC	2A	600187297	607187297	QTL_2A_2	-	1	***	tr|D7MF87|D7MF87_ARALL	Kinase family protein	PF08263: Leucine rich repeat N-terminal domain; PF00069: Protein kinase domain	IPR000719: Protein kinase domain; IPR003591: Leucine-rich repeat, typical subtype; IPR008271: Serine/threonine-protein kinase, active site; IPR011009: Protein kinase-like domain; IPR013210: Leucine-rich repeat-containing N-terminal, plant-type; IPR032675: Leucine-rich repeat domain, L domain-like	GO:0004672 MF: protein kinase activity;GO:0005524 MF: ATP binding;GO:0006468 BP: protein phosphorylation	G
HC	2A	600187297	607187297	QTL_2A_2	-	0	***	tr|D7MF87|D7MF87_ARALL	Kinase family protein	PF08263: Leucine rich repeat N-terminal domain; PF00069: Protein kinase domain	IPR000719: Protein kinase domain; IPR003591: Leucine-rich repeat, typical subtype; IPR008271: Serine/threonine-protein kinase, active site; IPR011009: Protein kinase-like domain; IPR013210: Leucine-rich repeat-containing N-terminal, plant-type; IPR032675: Leucine-rich repeat domain, L domain-like	GO:0004672 MF: protein kinase activity;GO:0005524 MF: ATP binding;GO:0006468 BP: protein phosphorylation	G
HC	2A	600187297	607187297	QTL_2A_2	-	0	***	tr|D7MF87|D7MF87_ARALL	Kinase family protein	PF08263: Leucine rich repeat N-terminal domain; PF00069: Protein kinase domain	IPR000719: Protein kinase domain; IPR003591: Leucine-rich repeat, typical subtype; IPR008271: Serine/threonine-protein kinase, active site; IPR011009: Protein kinase-like domain; IPR013210: Leucine-rich repeat-containing N-terminal, plant-type; IPR032675: Leucine-rich repeat domain, L domain-like	GO:0004672 MF: protein kinase activity;GO:0005524 MF: ATP binding;GO:0006468 BP: protein phosphorylation	G
HC	2A	600187297	607187297	QTL_2A_2	-	0	***	tr|D7MF87|D7MF87_ARALL	Kinase family protein	PF08263: Leucine rich repeat N-terminal domain; PF00069: Protein kinase domain	IPR000719: Protein kinase domain; IPR003591: Leucine-rich repeat, typical subtype; IPR008271: Serine/threonine-protein kinase, active site; IPR011009: Protein kinase-like domain; IPR013210: Leucine-rich repeat-containing N-terminal, plant-type; IPR032675: Leucine-rich repeat domain, L domain-like	GO:0004672 MF: protein kinase activity;GO:0005524 MF: ATP binding;GO:0006468 BP: protein phosphorylation	G
HC	2A	600187297	607187297	QTL_2A_2	-	0	***	tr|A7VM19|A7VM19_MARPO	Receptor-like kinase	PF08263: Leucine rich repeat N-terminal domain; PF00069: Protein kinase domain	IPR000719: Protein kinase domain; IPR003591: Leucine-rich repeat, typical subtype; IPR008271: Serine/threonine-protein kinase, active site; IPR011009: Protein kinase-like domain; IPR013210: Leucine-rich repeat-containing N-terminal, plant-type; IPR032675: Leucine-rich repeat domain, L domain-like	GO:0004672 MF: protein kinase activity;GO:0005524 MF: ATP binding;GO:0006468 BP: protein phosphorylation	G
HC	2A	600187297	607187297	QTL_2A_2	-	0	***	tr|A7VM19|A7VM19_MARPO	Receptor-like kinase	PF08263: Leucine rich repeat N-terminal domain; PF00069: Protein kinase domain	IPR000719: Protein kinase domain; IPR003591: Leucine-rich repeat, typical subtype; IPR008271: Serine/threonine-protein kinase, active site; IPR011009: Protein kinase-like domain; IPR013210: Leucine-rich repeat-containing N-terminal, plant-type; IPR032675: Leucine-rich repeat domain, L domain-like	GO:0004672 MF: protein kinase activity;GO:0005524 MF: ATP binding;GO:0006468 BP: protein phosphorylation	G
HC	2A	600187297	607187297	QTL_2A_2	-	0	***	tr|A7VM19|A7VM19_MARPO	Receptor-like kinase	PF08263: Leucine rich repeat N-terminal domain; PF00069: Protein kinase domain	IPR000719: Protein kinase domain; IPR003591: Leucine-rich repeat, typical subtype; IPR008271: Serine/threonine-protein kinase, active site; IPR011009: Protein kinase-like domain; IPR013210: Leucine-rich repeat-containing N-terminal, plant-type; IPR032675: Leucine-rich repeat domain, L domain-like	GO:0004672 MF: protein kinase activity;GO:0005524 MF: ATP binding;GO:0006468 BP: protein phosphorylation	G
HC	2A	600187297	607187297	QTL_2A_2	-	0	***	tr|A7VM19|A7VM19_MARPO	Receptor-like kinase	PF08263: Leucine rich repeat N-terminal domain; PF00069: Protein kinase domain	IPR000719: Protein kinase domain; IPR003591: Leucine-rich repeat, typical subtype; IPR008271: Serine/threonine-protein kinase, active site; IPR011009: Protein kinase-like domain; IPR013210: Leucine-rich repeat-containing N-terminal, plant-type; IPR032675: Leucine-rich repeat domain, L domain-like	GO:0004672 MF: protein kinase activity;GO:0005524 MF: ATP binding;GO:0006468 BP: protein phosphorylation	G
HC	2A	600187297	607187297	QTL_2A_2	-	0	***	tr|A7VM19|A7VM19_MARPO	Receptor-like kinase	PF08263: Leucine rich repeat N-terminal domain; PF00069: Protein kinase domain	IPR000719: Protein kinase domain; IPR003591: Leucine-rich repeat, typical subtype; IPR008271: Serine/threonine-protein kinase, active site; IPR011009: Protein kinase-like domain; IPR013210: Leucine-rich repeat-containing N-terminal, plant-type; IPR032675: Leucine-rich repeat domain, L domain-like	GO:0004672 MF: protein kinase activity;GO:0005524 MF: ATP binding;GO:0006468 BP: protein phosphorylation	G
HC	2A	600187297	607187297	QTL_2A_2	-	0	***	tr|A7VM19|A7VM19_MARPO	Receptor-like kinase	PF08263: Leucine rich repeat N-terminal domain; PF00069: Protein kinase domain	IPR000719: Protein kinase domain; IPR003591: Leucine-rich repeat, typical subtype; IPR008271: Serine/threonine-protein kinase, active site; IPR011009: Protein kinase-like domain; IPR013210: Leucine-rich repeat-containing N-terminal, plant-type; IPR032675: Leucine-rich repeat domain, L domain-like	GO:0004672 MF: protein kinase activity;GO:0005524 MF: ATP binding;GO:0006468 BP: protein phosphorylation	G
HC	2A	600187297	607187297	QTL_2A_2	-	1	-**	tr|A0A142G6I4|A0A142G6I4_9ROSI	30S ribosomal protein S16, chloroplastic	PF06839: GRF zinc finger	IPR010666: Zinc finger, GRF-type	GO:0008270 MF: zinc ion binding	G
HC	2A	600187297	607187297	QTL_2A_2	-	1	***	tr|A0A0K9PZ35|A0A0K9PZ35_ZOSMR	Serine incorporator	PF03348: Serine incorporator (Serinc)	IPR005016: Serine incorporator/TMS membrane protein	GO:0016020 CC: membrane	G
LC	2A	600187297	607187297	QTL_2A_2	-	1	--*	AT3G26855.1	RNA-directed DNA polymerase (reverse transcriptase)-related family protein	PF13966: zinc-binding in reverse transcriptase	IPR026960: Reverse transcriptase zinc-binding domain		TE
LC	2A	600187297	607187297	QTL_2A_2	-	1	*-*	tr|A0A0B2R0V5|A0A0B2R0V5_GLYSO	LINE-1 reverse transcriptase like				TE
LC	2A	600187297	607187297	QTL_2A_2	-	1	*-*	tr|A0A0B2R0V5|A0A0B2R0V5_GLYSO	LINE-1 reverse transcriptase like				TE
LC	2A	600187297	607187297	QTL_2A_2	+	1	*-*	tr|Q2QZK7|Q2QZK7_ORYSJ	Transposon protein, putative, CACTA, En/Spm sub-class				TE
LC	2A	600187297	607187297	QTL_2A_2	-	1	--*	AT3G23955.1	F-box family protein		IPR032675: Leucine-rich repeat domain, L domain-like		TE?
LC	2A	600187297	607187297	QTL_2A_2	-	1	*-*	tr|Q2QUC2|Q2QUC2_ORYSJ	Retrotransposon protein, putative, unclassified	PF13456: Reverse transcriptase-like	IPR012337: Ribonuclease H-like domain	GO:0003676 MF: nucleic acid binding	TE
HC	2A	600187297	607187297	QTL_2A_2	-	1	***	tr|Q5JMT5|Q5JMT5_ORYSJ	CBS domain-containing protein-like	PF00571: CBS domain; PF00564: PB1 domain	IPR000270: PB1 domain; IPR000644: CBS domain	GO:0005515 MF: protein binding	G
LC	2A	600187297	607187297	QTL_2A_2	-	1	***	tr|A0A1J3HNP1|A0A1J3HNP1_NOCCA	Glutathione S-transferase T3				G
HC	2A	600187297	607187297	QTL_2A_2	-	1	--*	sp|P14337|POLG_DEN28	Genome polyprotein				TE
LC	2A	600187297	607187297	QTL_2A_2	+	1	--*	tr|A0A1J3HLD3|A0A1J3HLD3_NOCCA	Transcription factor BOA				G
LC	2A	600187297	607187297	QTL_2A_2	-	1	***	tr|Q5JMT5|Q5JMT5_ORYSJ	CBS domain-containing protein-like	PF00571: CBS domain; PF00564: PB1 domain	IPR000270: PB1 domain; IPR000644: CBS domain	GO:0005515 MF: protein binding	G
LC	2A	600187297	607187297	QTL_2A_2	-	0	*-*	tr|Q5JMT5|Q5JMT5_ORYSJ	CBS domain-containing protein-like	PF00571: CBS domain	IPR000644: CBS domain		G
LC	2A	600187297	607187297	QTL_2A_2	-	0	*-*	tr|Q5JMT5|Q5JMT5_ORYSJ	CBS domain-containing protein-like	PF00571: CBS domain	IPR000644: CBS domain		G
LC	2A	600187297	607187297	QTL_2A_2	-	0	*-*	tr|Q5JMT5|Q5JMT5_ORYSJ	CBS domain-containing protein-like	PF00571: CBS domain	IPR000644: CBS domain		G
LC	2A	600187297	607187297	QTL_2A_2	-	1	*-*	tr|A0A151T9K9|A0A151T9K9_CAJCA	Transposon Ty3-G Gag-Pol polyprotein	PF00665: Integrase core domain; PF00385: Chromo (CHRromatin Organisation MOdifier) domain	IPR001584: Integrase, catalytic core; IPR012337: Ribonuclease H-like domain; IPR016197: Chromo domain-like; IPR023779: Chromo domain, conserved site; IPR023780: Chromo domain	GO:0003676 MF: nucleic acid binding;GO:0015074 BP: DNA integration	TE
LC	2A	600187297	607187297	QTL_2A_2	-	1	*-*	tr|A0A151T9K9|A0A151T9K9_CAJCA	Transposon Ty3-G Gag-Pol polyprotein	PF00665: Integrase core domain; PF00385: Chromo (CHRromatin Organisation MOdifier) domain	IPR001584: Integrase, catalytic core; IPR012337: Ribonuclease H-like domain; IPR016197: Chromo domain-like; IPR023779: Chromo domain, conserved site; IPR023780: Chromo domain	GO:0003676 MF: nucleic acid binding;GO:0015074 BP: DNA integration	TE
LC	2A	600187297	607187297	QTL_2A_2	-	1	*-*	sp|P10272|POL_BAEVM	Pol polyprotein	PF00078: Reverse transcriptase (RNA-dependent DNA polymerase)	IPR000477: Reverse transcriptase domain		TE
LC	2A	600187297	607187297	QTL_2A_2	-	1	--*	sp|P03355|POL_MLVMS	Gag-Pol polyprotein				TE
LC	2A	600187297	607187297	QTL_2A_2	-	1	*-*	tr|A0A1D1YF25|A0A1D1YF25_9ARAE	Transposon Ty3-G Gag-Pol polyprotein	PF03732: Retrotransposon gag protein	IPR001969: Aspartic peptidase, active site; IPR005162: Retrotransposon gag domain; IPR021109: Aspartic peptidase domain	GO:0004190 MF: aspartic-type endopeptidase activity;GO:0006508 BP: proteolysis	TE
LC	2A	600187297	607187297	QTL_2A_2	-	1	*-*	tr|A0A1D1YF25|A0A1D1YF25_9ARAE	Transposon Ty3-G Gag-Pol polyprotein	PF03732: Retrotransposon gag protein	IPR001969: Aspartic peptidase, active site; IPR005162: Retrotransposon gag domain; IPR021109: Aspartic peptidase domain	GO:0004190 MF: aspartic-type endopeptidase activity;GO:0006508 BP: proteolysis	TE
LC	2A	600187297	607187297	QTL_2A_2	-	1	*-*	tr|Q5JMT5|Q5JMT5_ORYSJ	CBS domain-containing protein-like				G
HC	2A	600187297	607187297	QTL_2A_2	-	1	--*	sp|Q8E0J5|HPRK_STRA5	HPr kinase/phosphorylase				G
HC	2A	600187297	607187297	QTL_2A_2	-	1	***	tr|M8A1D4|M8A1D4_TRIUA	Disease resistance protein RPP13	PF00931: NB-ARC domain	IPR002182: NB-ARC; IPR011991: Winged helix-turn-helix DNA-binding domain; IPR027417: P-loop containing nucleoside triphosphate hydrolase; IPR032675: Leucine-rich repeat domain, L domain-like	GO:0043531 MF: ADP binding	G
HC	2A	600187297	607187297	QTL_2A_2	-	1	*-*	tr|M8A1D4|M8A1D4_TRIUA	Disease resistance protein RPP13	PF00931: NB-ARC domain	IPR002182: NB-ARC; IPR027417: P-loop containing nucleoside triphosphate hydrolase	GO:0043531 MF: ADP binding	G
HC	2A	600187297	607187297	QTL_2A_2	-	1	--*	AT5G40060.2	Disease resistance protein (NBS-LRR class) family	PF00931: NB-ARC domain	IPR002182: NB-ARC; IPR027417: P-loop containing nucleoside triphosphate hydrolase	GO:0043531 MF: ADP binding	G
HC	2A	600187297	607187297	QTL_2A_2	-	0	--*	AT5G40060.1	Disease resistance protein (NBS-LRR class) family	PF00931: NB-ARC domain	IPR002182: NB-ARC; IPR027417: P-loop containing nucleoside triphosphate hydrolase	GO:0043531 MF: ADP binding	G
HC	2A	600187297	607187297	QTL_2A_2	-	1	***	tr|Q2QZI8|Q2QZI8_ORYSJ	NBS-LRR disease resistance protein, putative	PF00931: NB-ARC domain	IPR002182: NB-ARC; IPR011991: Winged helix-turn-helix DNA-binding domain; IPR027417: P-loop containing nucleoside triphosphate hydrolase; IPR032675: Leucine-rich repeat domain, L domain-like	GO:0043531 MF: ADP binding	G
LC	2A	600187297	607187297	QTL_2A_2	+	1	--*	sp|Q81J53|RL11A_BACCR	50S ribosomal protein L11-1				G
LC	2A	600187297	607187297	QTL_2A_2	+	1	--*	sp|Q6G5P5|TILS_BARHE	tRNA(Ile)-lysidine synthase				G
LC	2A	600187297	607187297	QTL_2A_2	-	1	*-*	tr|M8C7E2|M8C7E2_AEGTA	Disease resistance protein RPP13		IPR032675: Leucine-rich repeat domain, L domain-like		G
LC	2A	600187297	607187297	QTL_2A_2	-	1	*-*	tr|A0A1D1YF25|A0A1D1YF25_9ARAE	Transposon Ty3-G Gag-Pol polyprotein				TE
HC	2A	600187297	607187297	QTL_2A_2	-	1	***	tr|Q7G6C2|Q7G6C2_ORYSJ	F-box domain containing protein				TE?
HC	2A	600187297	607187297	QTL_2A_2	+	1	***	tr|A0A061ERK4|A0A061ERK4_THECC	Pectin lyase-like superfamily protein	PF00295: Glycosyl hydrolases family 28	IPR000743: Glycoside hydrolase, family 28; IPR006626: Parallel beta-helix repeat; IPR011050: Pectin lyase fold/virulence factor; IPR012334: Pectin lyase fold	GO:0004650 MF: polygalacturonase activity;GO:0005975 BP: carbohydrate metabolic process	G
HC	2A	600187297	607187297	QTL_2A_2	+	1	***	tr|A0A061ERK4|A0A061ERK4_THECC	Pectin lyase-like superfamily protein	PF00295: Glycosyl hydrolases family 28	IPR000743: Glycoside hydrolase, family 28; IPR006626: Parallel beta-helix repeat; IPR011050: Pectin lyase fold/virulence factor; IPR012334: Pectin lyase fold	GO:0004650 MF: polygalacturonase activity;GO:0005975 BP: carbohydrate metabolic process	G
LC	2A	600187297	607187297	QTL_2A_2	-	1	***	tr|A0A1D5W382|A0A1D5W382_WHEAT	E3 ubiquitin-protein ligase				G
LC	2A	600187297	607187297	QTL_2A_2	-	1	*-*	tr|A0A1D5V6Q6|A0A1D5V6Q6_WHEAT	E3 ubiquitin-protein ligase				G
HC	2A	600187297	607187297	QTL_2A_2	-	1	***	tr|A0A1D5WHG4|A0A1D5WHG4_WHEAT	E3 ubiquitin-protein ligase		IPR008974: TRAF-like	GO:0005515 MF: protein binding	G
LC	2A	600187297	607187297	QTL_2A_2	+	1	*-*	tr|A0A072U7W0|A0A072U7W0_MEDTR	Endonuclease/exonuclease/phosphatase family protein		IPR005135: Endonuclease/exonuclease/phosphatase		TE?
LC	2A	600187297	607187297	QTL_2A_2	+	1	-**	AT3G23320.1	Polynucleotidyl transferase, ribonuclease H-like superfamily protein	PF13456: Reverse transcriptase-like	IPR012337: Ribonuclease H-like domain	GO:0003676 MF: nucleic acid binding	TE
LC	2A	600187297	607187297	QTL_2A_2	+	1	--*	tr|A0A151SQS0|A0A151SQS0_CAJCA	Serine/threonine protein phosphatase 7 long form isogeny				G
LC	2A	600187297	607187297	QTL_2A_2	+	1	*-*	tr|Q2QZY5|Q2QZY5_ORYSJ	Transposon protein, putative, Mutator sub-class	PF10536: Plant mobile domain	IPR019557: Aminotransferase-like, plant mobile domain		TE
HC	2A	600187297	607187297	QTL_2A_2	+	1	--*	AT5G40060.2	Disease resistance protein (NBS-LRR class) family	PF00931: NB-ARC domain	IPR002182: NB-ARC; IPR027417: P-loop containing nucleoside triphosphate hydrolase	GO:0043531 MF: ADP binding	G
HC	2A	600187297	607187297	QTL_2A_2	+	1	***	tr|M8BKJ5|M8BKJ5_AEGTA	Disease resistance protein RPM1	PF00931: NB-ARC domain	IPR002182: NB-ARC; IPR011991: Winged helix-turn-helix DNA-binding domain; IPR032675: Leucine-rich repeat domain, L domain-like	GO:0043531 MF: ADP binding	G
LC	2A	600187297	607187297	QTL_2A_2	+	1	--*	AT3G01380.2	sulfatase and phosphatidylinositolglycan class N domain-containing protein				G
LC	2A	600187297	607187297	QTL_2A_2	-	1	--*	sp|Q32HI9|MPGP_SHIDS	Mannosyl-3-phosphoglycerate phosphatase		IPR005135: Endonuclease/exonuclease/phosphatase		TE?
LC	2A	600187297	607187297	QTL_2A_2	-	1	*-*	tr|A0A1J3DW99|A0A1J3DW99_NOCCA	Retrovirus-related Pol polyprotein from transposon TNT 1-94	PF14223: gag-polypeptide of LTR copia-type; PF14111: Domain of unknown function (DUF4283)	IPR025558: Domain of unknown function DUF4283		TE
HC	2A	600187297	607187297	QTL_2A_2	+	1	***	tr|Q7G4E5|Q7G4E5_ORYSJ	F-box domain containing protein		IPR001810: F-box domain	GO:0005515 MF: protein binding	TE?
LC	2A	600187297	607187297	QTL_2A_2	+	1	*-*	tr|A0A059Q143|A0A059Q143_9POAL	THO complex subunit 2-like protein	PF11262: Transcription factor/nuclear export subunit protein 2	IPR021418: THO complex, subunitTHOC2, C-terminal		G
LC	2A	600187297	607187297	QTL_2A_2	-	1	***	tr|Q6UJY6|Q6UJY6_TRITU	Far1-like	PF03101: FAR1 DNA-binding domain; PF10551: MULE transposase domain	IPR004330: FAR1 DNA binding domain; IPR018289: MULE transposase domain		TE
HC	2A	600187297	607187297	QTL_2A_2	-	1	***	AT4G28760.2	methyl-coenzyme M reductase II subunit gamma, putative (DUF3741)	PF14309: Domain of unknown function (DUF4378)	IPR025486: Domain of unknown function DUF4378		G
HC	2A	600187297	607187297	QTL_2A_2	-	0	***	AT4G28760.2	methyl-coenzyme M reductase II subunit gamma, putative (DUF3741)	PF14309: Domain of unknown function (DUF4378)	IPR025486: Domain of unknown function DUF4378		G
LC	2A	600187297	607187297	QTL_2A_2	-	1	*-*	tr|Q53PH7|Q53PH7_ORYSJ	Retrotransposon protein, putative, unclassified	PF13966: zinc-binding in reverse transcriptase	IPR026960: Reverse transcriptase zinc-binding domain		TE
LC	2A	600187297	607187297	QTL_2A_2	+	1	--*	sp|Q9I8D0|VPP1_CHICK	V-type proton ATPase 116 kDa subunit a isoform 1				G
LC	2A	600187297	607187297	QTL_2A_2	-	1	***	tr|Q0GR66|Q0GR66_ZEAPE	Cytochrome c biogenesis FC				G
LC	2A	600187297	607187297	QTL_2A_2	-	1	***	tr|A0A1I9KXH2|A0A1I9KXH2_9ASPA	50S ribosomal protein L14	PF00238: Ribosomal protein L14p/L23e	IPR000218: Ribosomal protein L14P	GO:0003735 MF: structural constituent of ribosome;GO:0005840 CC: ribosome;GO:0006412 BP: translation	G
LC	2A	600187297	607187297	QTL_2A_2	-	1	***	tr|A0A1I9KXH2|A0A1I9KXH2_9ASPA	50S ribosomal protein L14	PF00238: Ribosomal protein L14p/L23e	IPR000218: Ribosomal protein L14P	GO:0003735 MF: structural constituent of ribosome;GO:0005840 CC: ribosome;GO:0006412 BP: translation	G
LC	2A	600187297	607187297	QTL_2A_2	-	1	***	tr|A0A1I9KXH2|A0A1I9KXH2_9ASPA	50S ribosomal protein L14	PF00238: Ribosomal protein L14p/L23e	IPR000218: Ribosomal protein L14P	GO:0003735 MF: structural constituent of ribosome;GO:0005840 CC: ribosome;GO:0006412 BP: translation	G
LC	2A	600187297	607187297	QTL_2A_2	-	1	--*	sp|Q06H07|RPOC2_DRIGR	DNA-directed RNA polymerase subunit beta''				G
HC	2A	600187297	607187297	QTL_2A_2	-	1	***	tr|B9TAI9|B9TAI9_RICCO	30S ribosomal protein S7, putative	PF00177: Ribosomal protein S7p/S5e	IPR000235: Ribosomal protein S5/S7; IPR023798: Ribosomal protein S7 domain	GO:0006412 BP: translation	G
LC	2A	600187297	607187297	QTL_2A_2	-	1	--*	sp|B0V675|PYRG_ACIBY	CTP synthase				G
LC	2A	600187297	607187297	QTL_2A_2	-	1	--*	tr|A0A140F953|A0A140F953_9LAMI	ATP-dependent Clp protease proteolytic subunit				G
LC	2A	600187297	607187297	QTL_2A_2	-	1	*-*	tr|Q53PH7|Q53PH7_ORYSJ	Retrotransposon protein, putative, unclassified	PF00078: Reverse transcriptase (RNA-dependent DNA polymerase)	IPR000477: Reverse transcriptase domain		TE
LC	2A	600187297	607187297	QTL_2A_2	-	1	*-*	tr|Q33AJ4|Q33AJ4_ORYSJ	Retrotransposon protein, putative, unclassified				TE
LC	2A	600187297	607187297	QTL_2A_2	-	1	--*	AT5G26780.3	serine hydroxymethyltransferase 2				G
LC	2A	600187297	607187297	QTL_2A_2	-	1	--*	AT5G25520.3	SPOC domain / Transcription elongation factor S-II protein				G
LC	2A	600187297	607187297	QTL_2A_2	+	1	--*	tr|Q2QN46|Q2QN46_ORYSJ	BED zinc finger family protein	PF02892: BED zinc finger	IPR003656: Zinc finger, BED-type; IPR013087: Zinc finger C2H2-type	GO:0003676 MF: nucleic acid binding;GO:0003677 MF: DNA binding	TE?
LC	2A	600187297	607187297	QTL_2A_2	+	1	--*	tr|Q2QN46|Q2QN46_ORYSJ	BED zinc finger family protein	PF02892: BED zinc finger	IPR003656: Zinc finger, BED-type; IPR013087: Zinc finger C2H2-type	GO:0003676 MF: nucleic acid binding;GO:0003677 MF: DNA binding	TE?
HC	2A	600187297	607187297	QTL_2A_2	-	1	***	tr|N1QQS7|N1QQS7_AEGTA	DNA mismatch repair protein mutS	PF01624: MutS domain I; PF00488: MutS domain V; PF01541: GIY-YIG catalytic domain	IPR000305: GIY-YIG nuclease superfamily; IPR000432: DNA mismatch repair protein MutS, C-terminal; IPR007695: DNA mismatch repair protein MutS-like, N-terminal; IPR016151: DNA mismatch repair protein MutS, N-terminal; IPR027417: P-loop containing nucleoside triphosphate hydrolase	GO:0005524 MF: ATP binding;GO:0006298 BP: mismatch repair;GO:0030983 MF: mismatched DNA binding	G
HC	2A	600187297	607187297	QTL_2A_2	-	1	***	tr|N1QQS7|N1QQS7_AEGTA	DNA mismatch repair protein mutS	PF01624: MutS domain I; PF00488: MutS domain V; PF01541: GIY-YIG catalytic domain	IPR000305: GIY-YIG nuclease superfamily; IPR000432: DNA mismatch repair protein MutS, C-terminal; IPR007695: DNA mismatch repair protein MutS-like, N-terminal; IPR016151: DNA mismatch repair protein MutS, N-terminal; IPR027417: P-loop containing nucleoside triphosphate hydrolase	GO:0005524 MF: ATP binding;GO:0006298 BP: mismatch repair;GO:0030983 MF: mismatched DNA binding	G
HC	2A	600187297	607187297	QTL_2A_2	-	1	***	tr|N1QQS7|N1QQS7_AEGTA	DNA mismatch repair protein mutS	PF01624: MutS domain I; PF00488: MutS domain V; PF01541: GIY-YIG catalytic domain	IPR000305: GIY-YIG nuclease superfamily; IPR000432: DNA mismatch repair protein MutS, C-terminal; IPR007695: DNA mismatch repair protein MutS-like, N-terminal; IPR016151: DNA mismatch repair protein MutS, N-terminal; IPR027417: P-loop containing nucleoside triphosphate hydrolase	GO:0005524 MF: ATP binding;GO:0006298 BP: mismatch repair;GO:0030983 MF: mismatched DNA binding	G
LC	2A	600187297	607187297	QTL_2A_2	+	1	***	tr|Q7XE81|Q7XE81_ORYSJ	Retrotransposon protein, putative, LINE subclass				TE
LC	2A	600187297	607187297	QTL_2A_2	+	1	--*	AT3G24255.7	RNA-directed DNA polymerase (reverse transcriptase)-related family protein	PF13966: zinc-binding in reverse transcriptase	IPR026960: Reverse transcriptase zinc-binding domain		TE
LC	2A	600187297	607187297	QTL_2A_2	+	1	*-*	tr|Q10IA6|Q10IA6_ORYSJ	Retrotransposon protein, putative, unclassified	PF14111: Domain of unknown function (DUF4283)	IPR025558: Domain of unknown function DUF4283		TE
HC	2A	600187297	607187297	QTL_2A_2	-	1	***	tr|A0A199UH97|A0A199UH97_ANACO	Protein LOW PSII ACCUMULATION 1, chloroplastic	PF11998: Protein of unknown function (DUF3493)	IPR021883: Protein of unknown function DUF3493		G
HC	2A	600187297	607187297	QTL_2A_2	-	0	***	tr|A0A1J3C9A0|A0A1J3C9A0_NOCCA	Protein LOW PSII ACCUMULATION 1, chloroplastic	PF11998: Protein of unknown function (DUF3493)	IPR021883: Protein of unknown function DUF3493		G
LC	2A	600187297	607187297	QTL_2A_2	-	1	*-*	tr|G7LEF6|G7LEF6_MEDTR	Disease resistance protein (TIR-NBS-LRR class), putative		IPR032675: Leucine-rich repeat domain, L domain-like		G
HC	2A	600187297	607187297	QTL_2A_2	-	1	***	tr|M9SZF2|M9SZF2_COCNU	NBS-LRR resistance protein	PF00931: NB-ARC domain	IPR002182: NB-ARC; IPR011991: Winged helix-turn-helix DNA-binding domain; IPR027417: P-loop containing nucleoside triphosphate hydrolase; IPR032675: Leucine-rich repeat domain, L domain-like	GO:0043531 MF: ADP binding	G
HC	2A	600187297	607187297	QTL_2A_2	-	1	***	tr|A0A199VFJ9|A0A199VFJ9_ANACO	Benzyl alcohol O-benzoyltransferase	PF02458: Transferase family	IPR003480: Transferase	GO:0016747 MF: transferase activity, transferring acyl groups other than amino-acyl groups	G
LC	2A	600187297	607187297	QTL_2A_2	-	1	*-*	tr|Q2QZI0|Q2QZI0_ORYSJ	Retrotransposon protein, putative, unclassified				TE
LC	2A	600187297	607187297	QTL_2A_2	+	1	--*	tr|A0A1J6I7M7|A0A1J6I7M7_NICAT	p-loop ntpase domain-containing protein lpa1-like 2				G
HC	2A	600187297	607187297	QTL_2A_2	-	1	***	tr|A0A199VFJ9|A0A199VFJ9_ANACO	Benzyl alcohol O-benzoyltransferase	PF02458: Transferase family	IPR003480: Transferase	GO:0016747 MF: transferase activity, transferring acyl groups other than amino-acyl groups	G
HC	2A	600187297	607187297	QTL_2A_2	-	0	***	tr|B9GR98|B9GR98_POPTR	CLIP-associating family protein	PF02985: HEAT repeat; PF12348: CLASP N terminal	IPR000357: HEAT repeat; IPR011989: Armadillo-like helical; IPR016024: Armadillo-type fold; IPR021133: HEAT, type 2; IPR024395: CLASP N-terminal domain; IPR034085: TOG domain	GO:0005488 MF: binding;GO:0005515 MF: protein binding	G
HC	2A	600187297	607187297	QTL_2A_2	-	0	***	tr|B9GR98|B9GR98_POPTR	CLIP-associating family protein	PF02985: HEAT repeat; PF12348: CLASP N terminal	IPR000357: HEAT repeat; IPR011989: Armadillo-like helical; IPR016024: Armadillo-type fold; IPR021133: HEAT, type 2; IPR024395: CLASP N-terminal domain; IPR034085: TOG domain	GO:0005488 MF: binding;GO:0005515 MF: protein binding	G
HC	2A	600187297	607187297	QTL_2A_2	-	0	***	tr|B9GR98|B9GR98_POPTR	CLIP-associating family protein	PF02985: HEAT repeat; PF12348: CLASP N terminal	IPR000357: HEAT repeat; IPR011989: Armadillo-like helical; IPR016024: Armadillo-type fold; IPR021133: HEAT, type 2; IPR024395: CLASP N-terminal domain; IPR034085: TOG domain	GO:0005488 MF: binding;GO:0005515 MF: protein binding	G
HC	2A	600187297	607187297	QTL_2A_2	-	0	***	tr|B9GR98|B9GR98_POPTR	CLIP-associating family protein	PF02985: HEAT repeat; PF12348: CLASP N terminal	IPR000357: HEAT repeat; IPR011989: Armadillo-like helical; IPR016024: Armadillo-type fold; IPR021133: HEAT, type 2; IPR024395: CLASP N-terminal domain; IPR034085: TOG domain	GO:0005488 MF: binding;GO:0005515 MF: protein binding	G
HC	2A	600187297	607187297	QTL_2A_2	-	1	***	tr|B9GR98|B9GR98_POPTR	CLIP-associating family protein	PF02985: HEAT repeat; PF12348: CLASP N terminal	IPR000357: HEAT repeat; IPR011989: Armadillo-like helical; IPR016024: Armadillo-type fold; IPR021133: HEAT, type 2; IPR024395: CLASP N-terminal domain; IPR034085: TOG domain	GO:0005488 MF: binding;GO:0005515 MF: protein binding	G
HC	2A	600187297	607187297	QTL_2A_2	-	1	***	tr|B9GR98|B9GR98_POPTR	CLIP-associating family protein	PF02985: HEAT repeat; PF12348: CLASP N terminal	IPR000357: HEAT repeat; IPR011989: Armadillo-like helical; IPR016024: Armadillo-type fold; IPR021133: HEAT, type 2; IPR024395: CLASP N-terminal domain; IPR034085: TOG domain	GO:0005488 MF: binding;GO:0005515 MF: protein binding	G
HC	2A	674028807	681028807	QTL_2A_3	+	1	***	tr|Q4PLL4|Q4PLL4_9POAL	SHR5-receptor-like kinase	PF11721: Di-glucose binding within endoplasmic reticulum; PF00069: Protein kinase domain	IPR000719: Protein kinase domain; IPR006311: Twin-arginine translocation pathway, signal sequence; IPR008271: Serine/threonine-protein kinase, active site; IPR011009: Protein kinase-like domain; IPR017441: Protein kinase, ATP binding site; IPR021720: Malectin; IPR032675: Leucine-rich repeat domain, L domain-like	GO:0004672 MF: protein kinase activity;GO:0005524 MF: ATP binding;GO:0006468 BP: protein phosphorylation	G
HC	2A	674028807	681028807	QTL_2A_3	+	1	***	tr|Q4PLL4|Q4PLL4_9POAL	SHR5-receptor-like kinase	PF11721: Di-glucose binding within endoplasmic reticulum; PF00069: Protein kinase domain	IPR000719: Protein kinase domain; IPR006311: Twin-arginine translocation pathway, signal sequence; IPR008271: Serine/threonine-protein kinase, active site; IPR011009: Protein kinase-like domain; IPR017441: Protein kinase, ATP binding site; IPR021720: Malectin; IPR032675: Leucine-rich repeat domain, L domain-like	GO:0004672 MF: protein kinase activity;GO:0005524 MF: ATP binding;GO:0006468 BP: protein phosphorylation	G
HC	2A	674028807	681028807	QTL_2A_3	+	1	***	tr|Q4PLL4|Q4PLL4_9POAL	SHR5-receptor-like kinase	PF11721: Di-glucose binding within endoplasmic reticulum; PF00069: Protein kinase domain	IPR000719: Protein kinase domain; IPR006311: Twin-arginine translocation pathway, signal sequence; IPR008271: Serine/threonine-protein kinase, active site; IPR011009: Protein kinase-like domain; IPR017441: Protein kinase, ATP binding site; IPR021720: Malectin; IPR032675: Leucine-rich repeat domain, L domain-like	GO:0004672 MF: protein kinase activity;GO:0005524 MF: ATP binding;GO:0006468 BP: protein phosphorylation	G
HC	2A	674028807	681028807	QTL_2A_3	+	1	***	tr|Q4PLL4|Q4PLL4_9POAL	SHR5-receptor-like kinase	PF11721: Di-glucose binding within endoplasmic reticulum; PF00069: Protein kinase domain	IPR000719: Protein kinase domain; IPR008271: Serine/threonine-protein kinase, active site; IPR011009: Protein kinase-like domain; IPR017441: Protein kinase, ATP binding site; IPR021720: Malectin; IPR032675: Leucine-rich repeat domain, L domain-like	GO:0004672 MF: protein kinase activity;GO:0005524 MF: ATP binding;GO:0006468 BP: protein phosphorylation	G
HC	2A	674028807	681028807	QTL_2A_3	+	1	***	tr|Q4PLL4|Q4PLL4_9POAL	SHR5-receptor-like kinase	PF11721: Di-glucose binding within endoplasmic reticulum; PF00069: Protein kinase domain	IPR000719: Protein kinase domain; IPR008271: Serine/threonine-protein kinase, active site; IPR011009: Protein kinase-like domain; IPR017441: Protein kinase, ATP binding site; IPR021720: Malectin; IPR032675: Leucine-rich repeat domain, L domain-like	GO:0004672 MF: protein kinase activity;GO:0005524 MF: ATP binding;GO:0006468 BP: protein phosphorylation	G
HC	2A	674028807	681028807	QTL_2A_3	+	1	***	tr|Q4PLL4|Q4PLL4_9POAL	SHR5-receptor-like kinase	PF11721: Di-glucose binding within endoplasmic reticulum; PF00069: Protein kinase domain	IPR000719: Protein kinase domain; IPR008271: Serine/threonine-protein kinase, active site; IPR011009: Protein kinase-like domain; IPR017441: Protein kinase, ATP binding site; IPR021720: Malectin; IPR032675: Leucine-rich repeat domain, L domain-like	GO:0004672 MF: protein kinase activity;GO:0005524 MF: ATP binding;GO:0006468 BP: protein phosphorylation	G
HC	2A	674028807	681028807	QTL_2A_3	+	1	***	tr|Q4PLL4|Q4PLL4_9POAL	SHR5-receptor-like kinase	PF11721: Di-glucose binding within endoplasmic reticulum; PF00069: Protein kinase domain	IPR000719: Protein kinase domain; IPR008271: Serine/threonine-protein kinase, active site; IPR011009: Protein kinase-like domain; IPR017441: Protein kinase, ATP binding site; IPR021720: Malectin; IPR032675: Leucine-rich repeat domain, L domain-like	GO:0004672 MF: protein kinase activity;GO:0005524 MF: ATP binding;GO:0006468 BP: protein phosphorylation	G
HC	2A	674028807	681028807	QTL_2A_3	+	1	***	tr|Q4PLL4|Q4PLL4_9POAL	SHR5-receptor-like kinase	PF11721: Di-glucose binding within endoplasmic reticulum; PF00069: Protein kinase domain	IPR000719: Protein kinase domain; IPR008271: Serine/threonine-protein kinase, active site; IPR011009: Protein kinase-like domain; IPR017441: Protein kinase, ATP binding site; IPR021720: Malectin; IPR032675: Leucine-rich repeat domain, L domain-like	GO:0004672 MF: protein kinase activity;GO:0005524 MF: ATP binding;GO:0006468 BP: protein phosphorylation	G
HC	2A	674028807	681028807	QTL_2A_3	+	1	***	tr|Q4PLL4|Q4PLL4_9POAL	SHR5-receptor-like kinase	PF11721: Di-glucose binding within endoplasmic reticulum; PF00069: Protein kinase domain	IPR000719: Protein kinase domain; IPR008271: Serine/threonine-protein kinase, active site; IPR011009: Protein kinase-like domain; IPR017441: Protein kinase, ATP binding site; IPR021720: Malectin; IPR032675: Leucine-rich repeat domain, L domain-like	GO:0004672 MF: protein kinase activity;GO:0005524 MF: ATP binding;GO:0006468 BP: protein phosphorylation	G
LC	2A	674028807	681028807	QTL_2A_3	+	1	--*	AT2G32800.1	protein kinase family protein		IPR011009: Protein kinase-like domain		G
LC	2A	674028807	681028807	QTL_2A_3	+	1	*-*	tr|A0A1E5WI80|A0A1E5WI80_9POAL	Stress-response A/B barrel domain-containing protein HS1				G
LC	2A	674028807	681028807	QTL_2A_3	+	1	--*	AT1G16710.9	histone acetyltransferase of the CBP family 12				G
LC	2A	674028807	681028807	QTL_2A_3	+	1	--*	AT3G26320.1	cytochrome P450, family 71, subfamily B, polypeptide 36				G
LC	2A	674028807	681028807	QTL_2A_3	+	1	--*	sp|Q75BU5|GBG_ASHGO	Guanine nucleotide-binding protein subunit gamma				G
LC	2A	674028807	681028807	QTL_2A_3	-	1	--*	tr|A0A061G191|A0A061G191_THECC	Pentatricopeptide repeat superfamily protein, putative isoform 2				G
HC	2A	674028807	681028807	QTL_2A_3	-	1	--*	sp|Q5RAY1|P3C2A_PONAB	Phosphatidylinositol 4-phosphate 3-kinase C2 domain-containing subunit alpha				G
LC	2A	674028807	681028807	QTL_2A_3	-	1	*-*	tr|Q2QQV8|Q2QQV8_ORYSJ	Retrotransposon protein, putative, unclassified				TE
LC	2A	674028807	681028807	QTL_2A_3	+	1	*-*	tr|A0A061FD65|A0A061FD65_THECC	BED zinc finger,hAT family dimerization domain, putative	PF05699: hAT family C-terminal dimerisation region	IPR008906: HAT, C-terminal dimerisation domain; IPR012337: Ribonuclease H-like domain	GO:0003676 MF: nucleic acid binding;GO:0046983 MF: protein dimerization activity	TE
LC	2A	674028807	681028807	QTL_2A_3	+	1	*-*	tr|A0A061FD65|A0A061FD65_THECC	BED zinc finger,hAT family dimerization domain, putative	PF05699: hAT family C-terminal dimerisation region	IPR008906: HAT, C-terminal dimerisation domain; IPR012337: Ribonuclease H-like domain	GO:0003676 MF: nucleic acid binding;GO:0046983 MF: protein dimerization activity	TE
LC	2A	674028807	681028807	QTL_2A_3	+	1	*-*	tr|Q10PZ8|Q10PZ8_ORYSJ	Transposon protein, putative, Mutator sub-class	PF10551: MULE transposase domain	IPR001207: Transposase, mutator type; IPR018289: MULE transposase domain	GO:0003677 MF: DNA binding;GO:0004803 MF: transposase activity;GO:0006313 BP: transposition, DNA-mediated	TE
LC	2A	674028807	681028807	QTL_2A_3	+	1	*-*	tr|Q10PZ8|Q10PZ8_ORYSJ	Transposon protein, putative, Mutator sub-class	PF10551: MULE transposase domain	IPR001207: Transposase, mutator type; IPR018289: MULE transposase domain	GO:0003677 MF: DNA binding;GO:0004803 MF: transposase activity;GO:0006313 BP: transposition, DNA-mediated	TE
LC	2A	674028807	681028807	QTL_2A_3	+	1	*-*	tr|Q10PZ8|Q10PZ8_ORYSJ	Transposon protein, putative, Mutator sub-class	PF10551: MULE transposase domain	IPR001207: Transposase, mutator type; IPR018289: MULE transposase domain	GO:0003677 MF: DNA binding;GO:0004803 MF: transposase activity;GO:0006313 BP: transposition, DNA-mediated	TE
HC	2A	674028807	681028807	QTL_2A_3	-	1	--*	tr|A0A0J8B8I8|A0A0J8B8I8_BETVU	DNA topoisomerase				G
HC	2A	674028807	681028807	QTL_2A_3	+	1	--*	sp|B9IUW2|DLTA_BACCQ	D-alanine--poly(phosphoribitol) ligase subunit 1				G
HC	2A	674028807	681028807	QTL_2A_3	-	1	***	tr|B9I8T4|B9I8T4_POPTR	BTB/POZ domain-containing family protein	PF00651: BTB/POZ domain; PF07707: BTB And C-terminal Kelch	IPR000210: BTB/POZ domain; IPR008974: TRAF-like; IPR011333: SKP1/BTB/POZ domain; IPR011705: BTB/Kelch-associated	GO:0005515 MF: protein binding	G
LC	2A	674028807	681028807	QTL_2A_3	-	1	-**	AT2G13980.1	Polynucleotidyl transferase, ribonuclease H-like superfamily protein	PF13456: Reverse transcriptase-like	IPR012337: Ribonuclease H-like domain	GO:0003676 MF: nucleic acid binding	TE
HC	2A	674028807	681028807	QTL_2A_3	+	1	--*	tr|C1MP48|C1MP48_MICPC	ATP-binding cassette superfamily				G
HC	2A	674028807	681028807	QTL_2A_3	-	1	***	tr|G7K519|G7K519_MEDTR	Lipid transfer protein	PF14368: Probable lipid transfer	IPR016140: Bifunctional inhibitor/plant lipid transfer protein/seed storage helical domain		G
LC	2A	674028807	681028807	QTL_2A_3	+	1	***	tr|Q5SMW3|Q5SMW3_ORYSJ	Cyst nematode resistance protein-like				G
HC	2A	674028807	681028807	QTL_2A_3	+	1	*-*	tr|B9GQN7|B9GQN7_POPTR	Peptidylprolyl isomerase		IPR011990: Tetratricopeptide-like helical domain; IPR013026: Tetratricopeptide repeat-containing domain; IPR019734: Tetratricopeptide repeat	GO:0005515 MF: protein binding	G
HC	2A	674028807	681028807	QTL_2A_3	+	1	*-*	tr|A0A061EMS6|A0A061EMS6_THECC	PH-response transcription factor pacC/RIM101 isoform 2				G
HC	2A	674028807	681028807	QTL_2A_3	+	1	***	AT5G22540.1	transmembrane protein, putative (DUF247)	PF03140: Plant protein of unknown function	IPR004158: Protein of unknown function DUF247, plant		G
LC	2A	674028807	681028807	QTL_2A_3	+	1	--*	sp|Q8XYL1|MSRB_RALSO	Peptide methionine sulfoxide reductase MsrB				G
HC	2A	674028807	681028807	QTL_2A_3	+	1	*-*	tr|A0A1E5VW07|A0A1E5VW07_9POAL	Protein FAR1-RELATED SEQUENCE 5	PF03101: FAR1 DNA-binding domain; PF10551: MULE transposase domain; PF04434: SWIM zinc finger	IPR004330: FAR1 DNA binding domain; IPR006564: Zinc finger, PMZ-type; IPR007527: Zinc finger, SWIM-type; IPR018289: MULE transposase domain	GO:0008270 MF: zinc ion binding	TE
HC	2A	674028807	681028807	QTL_2A_3	-	1	***	tr|A0A061EB20|A0A061EB20_THECC	Argonaute family protein	PF16486: N-terminal domain of argonaute; PF02170: PAZ domain; PF02171: Piwi domain	IPR003100: PAZ domain; IPR003165: Piwi domain; IPR012337: Ribonuclease H-like domain; IPR014811: Argonaute, linker 1 domain; IPR032474: Protein argonaute, N-terminal	GO:0003676 MF: nucleic acid binding;GO:0005515 MF: protein binding	G
HC	2A	674028807	681028807	QTL_2A_3	-	1	***	tr|A0A061EB20|A0A061EB20_THECC	Argonaute family protein	PF16486: N-terminal domain of argonaute; PF02170: PAZ domain; PF02171: Piwi domain	IPR003100: PAZ domain; IPR003165: Piwi domain; IPR012337: Ribonuclease H-like domain; IPR014811: Argonaute, linker 1 domain; IPR032474: Protein argonaute, N-terminal	GO:0003676 MF: nucleic acid binding;GO:0005515 MF: protein binding	G
LC	2A	674028807	681028807	QTL_2A_3	-	1	--*	AT3G12020.4	P-loop containing nucleoside triphosphate hydrolases superfamily protein				G
HC	2A	674028807	681028807	QTL_2A_3	+	1	--*	AT3G16830.1	TOPLESS-related 2				G
HC	2A	674028807	681028807	QTL_2A_3	+	0	--*	AT3G16830.1	TOPLESS-related 2				G
LC	2A	674028807	681028807	QTL_2A_3	+	1	--*	tr|A0A061DJP2|A0A061DJP2_THECC	Ribonuclease H protein	PF13456: Reverse transcriptase-like	IPR012337: Ribonuclease H-like domain	GO:0003676 MF: nucleic acid binding	TE
LC	2A	674028807	681028807	QTL_2A_3	+	1	--*	AT2G25420.4	transducin family protein / WD-40 repeat family protein				G
LC	2A	674028807	681028807	QTL_2A_3	+	1	--*	tr|A0A061GN53|A0A061GN53_THECC	Ribonuclease H-like superfamily protein	PF13456: Reverse transcriptase-like	IPR012337: Ribonuclease H-like domain	GO:0003676 MF: nucleic acid binding	TE
HC	2A	674028807	681028807	QTL_2A_3	+	1	*-*	AT1G57790.1	F-box family protein	PF03478: Protein of unknown function (DUF295)	IPR001810: F-box domain; IPR005174: Domain unknown function DUF295	GO:0005515 MF: protein binding	TE?
HC	2A	674028807	681028807	QTL_2A_3	-	0	***	AT1G31280.1	Argonaute family protein	PF02170: PAZ domain; PF02171: Piwi domain	IPR003100: PAZ domain; IPR003165: Piwi domain; IPR012337: Ribonuclease H-like domain	GO:0003676 MF: nucleic acid binding;GO:0005515 MF: protein binding	G
HC	2A	674028807	681028807	QTL_2A_3	-	0	***	AT1G31280.1	Argonaute family protein	PF02170: PAZ domain; PF02171: Piwi domain	IPR003100: PAZ domain; IPR003165: Piwi domain; IPR012337: Ribonuclease H-like domain	GO:0003676 MF: nucleic acid binding;GO:0005515 MF: protein binding	G
HC	2A	674028807	681028807	QTL_2A_3	-	1	***	AT1G31280.1	Argonaute family protein	PF02170: PAZ domain; PF02171: Piwi domain	IPR003100: PAZ domain; IPR003165: Piwi domain; IPR012337: Ribonuclease H-like domain	GO:0003676 MF: nucleic acid binding;GO:0005515 MF: protein binding	G
HC	2A	674028807	681028807	QTL_2A_3	-	1	***	AT1G31280.1	Argonaute family protein	PF02170: PAZ domain; PF02171: Piwi domain	IPR003100: PAZ domain; IPR003165: Piwi domain; IPR012337: Ribonuclease H-like domain	GO:0003676 MF: nucleic acid binding;GO:0005515 MF: protein binding	G
LC	2A	674028807	681028807	QTL_2A_3	+	1	*-*	tr|A0A0B2R0V5|A0A0B2R0V5_GLYSO	LINE-1 reverse transcriptase like	PF00078: Reverse transcriptase (RNA-dependent DNA polymerase)	IPR000477: Reverse transcriptase domain		TE
HC	2A	674028807	681028807	QTL_2A_3	-	1	***	tr|A0A061EB20|A0A061EB20_THECC	Argonaute family protein	PF16486: N-terminal domain of argonaute; PF08699: Argonaute linker 1 domain; PF02170: PAZ domain; PF16488: Argonaute linker 2 domain; PF16487: Mid domain of argonaute; PF02171: Piwi domain	IPR003100: PAZ domain; IPR003165: Piwi domain; IPR012337: Ribonuclease H-like domain; IPR014811: Argonaute, linker 1 domain; IPR032472: Argonaute linker 2 domain; IPR032473: Protein argonaute, Mid domain; IPR032474: Protein argonaute, N-terminal	GO:0003676 MF: nucleic acid binding;GO:0005515 MF: protein binding	G
HC	2A	674028807	681028807	QTL_2A_3	-	1	***	tr|A0A061EB20|A0A061EB20_THECC	Argonaute family protein	PF16486: N-terminal domain of argonaute; PF08699: Argonaute linker 1 domain; PF02170: PAZ domain; PF16488: Argonaute linker 2 domain; PF16487: Mid domain of argonaute; PF02171: Piwi domain	IPR003100: PAZ domain; IPR003165: Piwi domain; IPR012337: Ribonuclease H-like domain; IPR014811: Argonaute, linker 1 domain; IPR032472: Argonaute linker 2 domain; IPR032473: Protein argonaute, Mid domain; IPR032474: Protein argonaute, N-terminal	GO:0003676 MF: nucleic acid binding;GO:0005515 MF: protein binding	G
HC	2A	674028807	681028807	QTL_2A_3	-	0	***	AT1G31280.1	Argonaute family protein	PF16486: N-terminal domain of argonaute; PF08699: Argonaute linker 1 domain; PF02170: PAZ domain; PF16488: Argonaute linker 2 domain; PF16487: Mid domain of argonaute; PF02171: Piwi domain	IPR003100: PAZ domain; IPR003165: Piwi domain; IPR012337: Ribonuclease H-like domain; IPR014811: Argonaute, linker 1 domain; IPR032472: Argonaute linker 2 domain; IPR032473: Protein argonaute, Mid domain; IPR032474: Protein argonaute, N-terminal	GO:0003676 MF: nucleic acid binding;GO:0005515 MF: protein binding	G
HC	2A	674028807	681028807	QTL_2A_3	-	0	***	AT1G31280.1	Argonaute family protein	PF16486: N-terminal domain of argonaute; PF08699: Argonaute linker 1 domain; PF02170: PAZ domain; PF16488: Argonaute linker 2 domain; PF16487: Mid domain of argonaute; PF02171: Piwi domain	IPR003100: PAZ domain; IPR003165: Piwi domain; IPR012337: Ribonuclease H-like domain; IPR014811: Argonaute, linker 1 domain; IPR032472: Argonaute linker 2 domain; IPR032473: Protein argonaute, Mid domain; IPR032474: Protein argonaute, N-terminal	GO:0003676 MF: nucleic acid binding;GO:0005515 MF: protein binding	G
HC	2A	674028807	681028807	QTL_2A_3	-	0	***	tr|A0A061EB20|A0A061EB20_THECC	Argonaute family protein	PF08699: Argonaute linker 1 domain; PF02170: PAZ domain; PF16488: Argonaute linker 2 domain; PF16487: Mid domain of argonaute; PF02171: Piwi domain	IPR003100: PAZ domain; IPR003165: Piwi domain; IPR012337: Ribonuclease H-like domain; IPR014811: Argonaute, linker 1 domain; IPR032472: Argonaute linker 2 domain; IPR032473: Protein argonaute, Mid domain	GO:0003676 MF: nucleic acid binding;GO:0005515 MF: protein binding	G
HC	2A	674028807	681028807	QTL_2A_3	-	0	***	tr|A0A061EB20|A0A061EB20_THECC	Argonaute family protein	PF08699: Argonaute linker 1 domain; PF02170: PAZ domain; PF16488: Argonaute linker 2 domain; PF16487: Mid domain of argonaute; PF02171: Piwi domain	IPR003100: PAZ domain; IPR003165: Piwi domain; IPR012337: Ribonuclease H-like domain; IPR014811: Argonaute, linker 1 domain; IPR032472: Argonaute linker 2 domain; IPR032473: Protein argonaute, Mid domain	GO:0003676 MF: nucleic acid binding;GO:0005515 MF: protein binding	G
LC	2A	674028807	681028807	QTL_2A_3	+	1	--*	sp|P44685|CPDA_HAEIN	3',5'-cyclic adenosine monophosphate phosphodiesterase CpdA				G
LC	2A	674028807	681028807	QTL_2A_3	+	1	--*	sp|A9B536|ACCD_HERA2	Acetyl-coenzyme A carboxylase carboxyl transferase subunit beta				G
HC	2A	674028807	681028807	QTL_2A_3	-	1	***	tr|A0A061DZH3|A0A061DZH3_THECC	Calcium-binding EF-hand family protein		IPR002048: EF-hand domain; IPR011992: EF-hand domain pair; IPR018247: EF-Hand 1, calcium-binding site	GO:0005509 MF: calcium ion binding	G
HC	2A	674028807	681028807	QTL_2A_3	+	1	***	tr|A0A072U8Q8|A0A072U8Q8_MEDTR	RNA polymerase II, Rpb4, core protein	PF03874: RNA polymerase Rpb4	IPR005574: RNA polymerase II, Rpb4; IPR006590: RNA polymerase II, Rpb4, core; IPR010997: HRDC-like	GO:0000166 MF: nucleotide binding;GO:0003824 MF: catalytic activity;GO:0003899 MF: DNA-directed 5'-3' RNA polymerase activity;GO:0006351 BP: transcription, DNA-templated;GO:0044237 BP: cellular metabolic process	G
HC	2A	674028807	681028807	QTL_2A_3	+	1	***	tr|A0A072U8Q8|A0A072U8Q8_MEDTR	RNA polymerase II, Rpb4, core protein	PF03874: RNA polymerase Rpb4	IPR005574: RNA polymerase II, Rpb4; IPR006590: RNA polymerase II, Rpb4, core; IPR010997: HRDC-like	GO:0000166 MF: nucleotide binding;GO:0003824 MF: catalytic activity;GO:0003899 MF: DNA-directed 5'-3' RNA polymerase activity;GO:0006351 BP: transcription, DNA-templated;GO:0044237 BP: cellular metabolic process	G
HC	2A	674028807	681028807	QTL_2A_3	+	1	***	tr|A0A072U8Q8|A0A072U8Q8_MEDTR	RNA polymerase II, Rpb4, core protein	PF03874: RNA polymerase Rpb4	IPR005574: RNA polymerase II, Rpb4; IPR006590: RNA polymerase II, Rpb4, core; IPR010997: HRDC-like	GO:0000166 MF: nucleotide binding;GO:0003824 MF: catalytic activity;GO:0003899 MF: DNA-directed 5'-3' RNA polymerase activity;GO:0006351 BP: transcription, DNA-templated;GO:0044237 BP: cellular metabolic process	G
HC	2A	674028807	681028807	QTL_2A_3	+	1	***	tr|A0A072U8Q8|A0A072U8Q8_MEDTR	RNA polymerase II, Rpb4, core protein	PF03874: RNA polymerase Rpb4	IPR005574: RNA polymerase II, Rpb4; IPR006590: RNA polymerase II, Rpb4, core; IPR010997: HRDC-like	GO:0000166 MF: nucleotide binding;GO:0003824 MF: catalytic activity;GO:0003899 MF: DNA-directed 5'-3' RNA polymerase activity;GO:0006351 BP: transcription, DNA-templated;GO:0044237 BP: cellular metabolic process	G
HC	2A	674028807	681028807	QTL_2A_3	+	1	***	tr|A0A072U8Q8|A0A072U8Q8_MEDTR	RNA polymerase II, Rpb4, core protein	PF03874: RNA polymerase Rpb4	IPR005574: RNA polymerase II, Rpb4; IPR006590: RNA polymerase II, Rpb4, core; IPR010997: HRDC-like	GO:0000166 MF: nucleotide binding;GO:0003824 MF: catalytic activity;GO:0003899 MF: DNA-directed 5'-3' RNA polymerase activity;GO:0006351 BP: transcription, DNA-templated;GO:0044237 BP: cellular metabolic process	G
LC	2A	674028807	681028807	QTL_2A_3	+	1	*-*	tr|M8BU25|M8BU25_AEGTA	Protein FAR1-RELATED SEQUENCE 5	PF03101: FAR1 DNA-binding domain; PF10551: MULE transposase domain	IPR004330: FAR1 DNA binding domain; IPR006564: Zinc finger, PMZ-type; IPR007527: Zinc finger, SWIM-type; IPR018289: MULE transposase domain	GO:0008270 MF: zinc ion binding	TE
LC	2A	674028807	681028807	QTL_2A_3	+	1	--*	AT4G34100.2	RING/U-box superfamily protein				G
LC	2A	674028807	681028807	QTL_2A_3	+	1	--*	tr|D7LSS4|D7LSS4_ARALL	Peptidyl-prolyl cis-trans isomerase				G
HC	2A	674028807	681028807	QTL_2A_3	-	1	--*	sp|P31661|SC6A8_RABIT	Sodium- and chloride-dependent creatine transporter 1				G
HC	2A	674028807	681028807	QTL_2A_3	-	0	--*	sp|P31661|SC6A8_RABIT	Sodium- and chloride-dependent creatine transporter 1				G
HC	2A	674028807	681028807	QTL_2A_3	+	1	--*	sp|Q8BLF2|CDKL3_MOUSE	Cyclin-dependent kinase-like 3				G
LC	2A	674028807	681028807	QTL_2A_3	-	1	--*	AT2G30290.2	VACUOLAR SORTING RECEPTOR 2				G
HC	2A	674028807	681028807	QTL_2A_3	-	1	--*	AT1G17380.3	jasmonate-zim-domain protein 5				G
LC	2A	674028807	681028807	QTL_2A_3	-	1	--*	sp|A6LEP7|FABH_PARD8	3-oxoacyl-[acyl-carrier-protein] synthase 3				G
LC	2A	674028807	681028807	QTL_2A_3	-	1	--*	sp|Q1DHH9|UTP10_COCIM	U3 small nucleolar RNA-associated protein 10				G
HC	2A	674028807	681028807	QTL_2A_3	-	1	*-*	tr|F4J9P5|F4J9P5_ARATH	Heavy metal transport/detoxification superfamily protein		IPR006121: Heavy metal-associated domain, HMA	GO:0030001 BP: metal ion transport;GO:0046872 MF: metal ion binding	G
HC	2A	674028807	681028807	QTL_2A_3	-	1	*-*	tr|F4J9P5|F4J9P5_ARATH	Heavy metal transport/detoxification superfamily protein		IPR006121: Heavy metal-associated domain, HMA	GO:0030001 BP: metal ion transport;GO:0046872 MF: metal ion binding	G
HC	2A	674028807	681028807	QTL_2A_3	-	1	***	tr|A0A0K9P386|A0A0K9P386_ZOSMR	APO protein	PF05634: APO RNA-binding	IPR023342: APO domain	GO:0003723 MF: RNA binding	G
HC	2A	674028807	681028807	QTL_2A_3	-	0	***	tr|A0A0K9P386|A0A0K9P386_ZOSMR	APO protein	PF05634: APO RNA-binding	IPR023342: APO domain	GO:0003723 MF: RNA binding	G
LC	2A	674028807	681028807	QTL_2A_3	+	1	***	tr|A0A072TP34|A0A072TP34_MEDTR	FAR1-related sequence protein, putative				TE
HC	2A	674028807	681028807	QTL_2A_3	+	1	-**	AT2G32210.1	cysteine-rich/transmembrane domain A-like protein	PF12734: Cysteine-rich TM module stress tolerance	IPR028144: Cysteine-rich transmembrane CYSTM domain		G
LC	2A	674028807	681028807	QTL_2A_3	+	1	-**	AT2G32210.1	cysteine-rich/transmembrane domain A-like protein	PF12734: Cysteine-rich TM module stress tolerance	IPR028144: Cysteine-rich transmembrane CYSTM domain		G
HC	2A	674028807	681028807	QTL_2A_3	-	1	***	tr|A2Q294|A2Q294_MEDTR	Lecithin:cholesterol acyltransferase	PF02450: Lecithin:cholesterol acyltransferase	IPR003386: Lecithin:cholesterol/phospholipid:diacylglycerol acyltransferase; IPR029058: Alpha/Beta hydrolase fold	GO:0006629 BP: lipid metabolic process;GO:0008374 MF: O-acyltransferase activity	G
HC	2A	674028807	681028807	QTL_2A_3	-	1	***	tr|A2Q294|A2Q294_MEDTR	Lecithin:cholesterol acyltransferase	PF02450: Lecithin:cholesterol acyltransferase	IPR003386: Lecithin:cholesterol/phospholipid:diacylglycerol acyltransferase; IPR029058: Alpha/Beta hydrolase fold	GO:0006629 BP: lipid metabolic process;GO:0008374 MF: O-acyltransferase activity	G
HC	2A	674028807	681028807	QTL_2A_3	-	0	--*	sp|Q31IY5|EFG_THICR	Elongation factor G		IPR009003: Peptidase S1, PA clan		G
HC	2A	674028807	681028807	QTL_2A_3	-	1	--*	sp|Q31IY5|EFG_THICR	Elongation factor G		IPR009003: Peptidase S1, PA clan		G
HC	2A	674028807	681028807	QTL_2A_3	-	0	--*	sp|Q31IY5|EFG_THICR	Elongation factor G		IPR009003: Peptidase S1, PA clan		G
LC	2A	674028807	681028807	QTL_2A_3	+	1	*-*	tr|M7ZS24|M7ZS24_TRIUA	Basic 7S globulin 2	PF14541: Xylanase inhibitor C-terminal	IPR021109: Aspartic peptidase domain; IPR032799: Xylanase inhibitor, C-terminal		G
HC	2A	674028807	681028807	QTL_2A_3	-	1	***	tr|M8BC37|M8BC37_AEGTA	Disease resistance protein RPM1	PF00931: NB-ARC domain; PF13855: Leucine rich repeat	IPR001611: Leucine-rich repeat; IPR002182: NB-ARC; IPR011991: Winged helix-turn-helix DNA-binding domain; IPR027417: P-loop containing nucleoside triphosphate hydrolase; IPR032675: Leucine-rich repeat domain, L domain-like	GO:0005515 MF: protein binding;GO:0043531 MF: ADP binding	G
HC	2A	674028807	681028807	QTL_2A_3	-	1	***	tr|M8BC37|M8BC37_AEGTA	Disease resistance protein RPM1	PF00931: NB-ARC domain; PF13855: Leucine rich repeat	IPR001611: Leucine-rich repeat; IPR002182: NB-ARC; IPR011991: Winged helix-turn-helix DNA-binding domain; IPR027417: P-loop containing nucleoside triphosphate hydrolase; IPR032675: Leucine-rich repeat domain, L domain-like	GO:0005515 MF: protein binding;GO:0043531 MF: ADP binding	G
LC	2A	674028807	681028807	QTL_2A_3	+	1	*-*	tr|G7KEH2|G7KEH2_MEDTR	Lectin receptor kinase		IPR011009: Protein kinase-like domain		G
LC	2A	674028807	681028807	QTL_2A_3	+	1	-**	tr|G7LIE6|G7LIE6_MEDTR	Myb/SANT-like DNA-binding domain protein	PF12776: Myb/SANT-like DNA-binding domain	IPR024752: Myb/SANT-like domain		TE?
HC	2A	674028807	681028807	QTL_2A_3	-	1	*-*	AT1G05320.9	myosin heavy chain, embryonic smooth protein				G
HC	2A	674028807	681028807	QTL_2A_3	-	0	*-*	AT1G05320.9	myosin heavy chain, embryonic smooth protein				G
HC	2A	674028807	681028807	QTL_2A_3	-	0	*-*	AT1G05320.6	myosin heavy chain, embryonic smooth protein				G
HC	2A	674028807	681028807	QTL_2A_3	-	1	--*	sp|C1CES2|VATA_STRZJ	V-type ATP synthase alpha chain				G
HC	2A	674028807	681028807	QTL_2A_3	+	1	***	AT5G11420.1	transmembrane protein, putative (Protein of unknown function, DUF642)	PF04862: Protein of unknown function (DUF642)	IPR006946: Domain of unknown function DUF642; IPR008979: Galactose-binding domain-like		U
HC	2A	674028807	681028807	QTL_2A_3	+	0	***	AT5G11420.1	transmembrane protein, putative (Protein of unknown function, DUF642)	PF04862: Protein of unknown function (DUF642)	IPR006946: Domain of unknown function DUF642; IPR008979: Galactose-binding domain-like		U
HC	2A	674028807	681028807	QTL_2A_3	-	1	***	tr|D2KZ08|D2KZ08_WHEAT	Aminotransferase	PF00202: Aminotransferase class-III	IPR005814: Aminotransferase class-III; IPR015421: Pyridoxal phosphate-dependent transferase, major region, subdomain 1; IPR015422: Pyridoxal phosphate-dependent transferase, subdomain 2; IPR015424: Pyridoxal phosphate-dependent transferase	GO:0003824 MF: catalytic activity;GO:0008483 MF: transaminase activity;GO:0030170 MF: pyridoxal phosphate binding	G
HC	2A	674028807	681028807	QTL_2A_3	-	1	***	tr|D2KZ08|D2KZ08_WHEAT	Aminotransferase	PF00202: Aminotransferase class-III	IPR005814: Aminotransferase class-III; IPR015421: Pyridoxal phosphate-dependent transferase, major region, subdomain 1; IPR015422: Pyridoxal phosphate-dependent transferase, subdomain 2; IPR015424: Pyridoxal phosphate-dependent transferase	GO:0003824 MF: catalytic activity;GO:0008483 MF: transaminase activity;GO:0030170 MF: pyridoxal phosphate binding	G
HC	2A	674028807	681028807	QTL_2A_3	-	1	***	tr|D2KZ08|D2KZ08_WHEAT	Aminotransferase	PF00202: Aminotransferase class-III	IPR005814: Aminotransferase class-III; IPR015421: Pyridoxal phosphate-dependent transferase, major region, subdomain 1; IPR015422: Pyridoxal phosphate-dependent transferase, subdomain 2; IPR015424: Pyridoxal phosphate-dependent transferase	GO:0003824 MF: catalytic activity;GO:0008483 MF: transaminase activity;GO:0030170 MF: pyridoxal phosphate binding	G
LC	2A	674028807	681028807	QTL_2A_3	-	1	--*	AT1G05830.4	trithorax-like protein 2				G
LC	2A	674028807	681028807	QTL_2A_3	-	1	*-*	tr|A0A1J3CD56|A0A1J3CD56_NOCCA	Zinc finger BED domain-containing protein DAYSLEEPER		IPR012337: Ribonuclease H-like domain	GO:0003676 MF: nucleic acid binding	TE
LC	2A	674028807	681028807	QTL_2A_3	-	1	*-*	tr|A0A061DK10|A0A061DK10_THECC	BED zinc finger,hAT family dimerization domain	PF14372: Domain of unknown function (DUF4413); PF05699: hAT family C-terminal dimerisation region	IPR008906: HAT, C-terminal dimerisation domain; IPR012337: Ribonuclease H-like domain; IPR025525: hAT-like transposase, RNase-H fold	GO:0003676 MF: nucleic acid binding;GO:0003677 MF: DNA binding;GO:0046983 MF: protein dimerization activity	TE
LC	2A	674028807	681028807	QTL_2A_3	-	1	*-*	tr|A0A061DK10|A0A061DK10_THECC	BED zinc finger,hAT family dimerization domain	PF14372: Domain of unknown function (DUF4413); PF05699: hAT family C-terminal dimerisation region	IPR008906: HAT, C-terminal dimerisation domain; IPR012337: Ribonuclease H-like domain; IPR025525: hAT-like transposase, RNase-H fold	GO:0003676 MF: nucleic acid binding;GO:0003677 MF: DNA binding;GO:0046983 MF: protein dimerization activity	TE
LC	2A	674028807	681028807	QTL_2A_3	-	1	*-*	tr|A0A061DK10|A0A061DK10_THECC	BED zinc finger,hAT family dimerization domain	PF14372: Domain of unknown function (DUF4413); PF05699: hAT family C-terminal dimerisation region	IPR008906: HAT, C-terminal dimerisation domain; IPR012337: Ribonuclease H-like domain; IPR025525: hAT-like transposase, RNase-H fold	GO:0003676 MF: nucleic acid binding;GO:0003677 MF: DNA binding;GO:0046983 MF: protein dimerization activity	TE
HC	2A	674028807	681028807	QTL_2A_3	-	1	***	tr|B9SBS8|B9SBS8_RICCO	Cysteine protease, putative	PF08246: Cathepsin propeptide inhibitor domain (I29); PF00112: Papain family cysteine protease	IPR000668: Peptidase C1A, papain C-terminal; IPR013201: Cathepsin propeptide inhibitor domain (I29)	GO:0006508 BP: proteolysis;GO:0008234 MF: cysteine-type peptidase activity	G
HC	2A	674028807	681028807	QTL_2A_3	-	1	***	tr|B9SBS8|B9SBS8_RICCO	Cysteine protease, putative	PF08246: Cathepsin propeptide inhibitor domain (I29); PF00112: Papain family cysteine protease	IPR000668: Peptidase C1A, papain C-terminal; IPR013201: Cathepsin propeptide inhibitor domain (I29)	GO:0006508 BP: proteolysis;GO:0008234 MF: cysteine-type peptidase activity	G
LC	2A	674028807	681028807	QTL_2A_3	+	1	*-*	tr|N1R2U9|N1R2U9_AEGTA	Protein FAR1-RELATED SEQUENCE 5				TE
LC	2A	674028807	681028807	QTL_2A_3	+	1	--*	sp|Q5WY52|CCMA_LEGPL	Cytochrome c biogenesis ATP-binding export protein CcmA				G
LC	2A	674028807	681028807	QTL_2A_3	-	1	--*	AT2G04420.1	Polynucleotidyl transferase, ribonuclease H-like superfamily protein	PF13456: Reverse transcriptase-like			TE
HC	2A	674028807	681028807	QTL_2A_3	-	1	***	tr|J7GS39|J7GS39_9SOLN	Cysteine protease	PF08246: Cathepsin propeptide inhibitor domain (I29); PF00112: Papain family cysteine protease	IPR000169: Cysteine peptidase, cysteine active site; IPR000668: Peptidase C1A, papain C-terminal; IPR013201: Cathepsin propeptide inhibitor domain (I29); IPR025660: Cysteine peptidase, histidine active site	GO:0006508 BP: proteolysis;GO:0008234 MF: cysteine-type peptidase activity	G
HC	2A	674028807	681028807	QTL_2A_3	-	1	***	tr|J7GS39|J7GS39_9SOLN	Cysteine protease	PF08246: Cathepsin propeptide inhibitor domain (I29); PF00112: Papain family cysteine protease	IPR000169: Cysteine peptidase, cysteine active site; IPR000668: Peptidase C1A, papain C-terminal; IPR013201: Cathepsin propeptide inhibitor domain (I29); IPR025660: Cysteine peptidase, histidine active site	GO:0006508 BP: proteolysis;GO:0008234 MF: cysteine-type peptidase activity	G
HC	2A	674028807	681028807	QTL_2A_3	-	1	***	tr|J7GS39|J7GS39_9SOLN	Cysteine protease	PF08246: Cathepsin propeptide inhibitor domain (I29); PF00112: Papain family cysteine protease	IPR000169: Cysteine peptidase, cysteine active site; IPR000668: Peptidase C1A, papain C-terminal; IPR013201: Cathepsin propeptide inhibitor domain (I29); IPR025660: Cysteine peptidase, histidine active site	GO:0006508 BP: proteolysis;GO:0008234 MF: cysteine-type peptidase activity	G
HC	2A	674028807	681028807	QTL_2A_3	-	1	***	tr|J7GS39|J7GS39_9SOLN	Cysteine protease	PF08246: Cathepsin propeptide inhibitor domain (I29); PF00112: Papain family cysteine protease	IPR000169: Cysteine peptidase, cysteine active site; IPR000668: Peptidase C1A, papain C-terminal; IPR013201: Cathepsin propeptide inhibitor domain (I29); IPR025660: Cysteine peptidase, histidine active site	GO:0006508 BP: proteolysis;GO:0008234 MF: cysteine-type peptidase activity	G
HC	2A	674028807	681028807	QTL_2A_3	-	1	***	tr|J7GS39|J7GS39_9SOLN	Cysteine protease	PF08246: Cathepsin propeptide inhibitor domain (I29); PF00112: Papain family cysteine protease	IPR000169: Cysteine peptidase, cysteine active site; IPR000668: Peptidase C1A, papain C-terminal; IPR013201: Cathepsin propeptide inhibitor domain (I29); IPR025660: Cysteine peptidase, histidine active site	GO:0006508 BP: proteolysis;GO:0008234 MF: cysteine-type peptidase activity	G
HC	2A	674028807	681028807	QTL_2A_3	-	1	***	tr|J7GS39|J7GS39_9SOLN	Cysteine protease	PF08246: Cathepsin propeptide inhibitor domain (I29); PF00112: Papain family cysteine protease	IPR000169: Cysteine peptidase, cysteine active site; IPR000668: Peptidase C1A, papain C-terminal; IPR013201: Cathepsin propeptide inhibitor domain (I29); IPR025660: Cysteine peptidase, histidine active site	GO:0006508 BP: proteolysis;GO:0008234 MF: cysteine-type peptidase activity	G
HC	2A	674028807	681028807	QTL_2A_3	-	1	***	tr|J7GS39|J7GS39_9SOLN	Cysteine protease	PF08246: Cathepsin propeptide inhibitor domain (I29); PF00112: Papain family cysteine protease	IPR000169: Cysteine peptidase, cysteine active site; IPR000668: Peptidase C1A, papain C-terminal; IPR013201: Cathepsin propeptide inhibitor domain (I29); IPR025660: Cysteine peptidase, histidine active site	GO:0006508 BP: proteolysis;GO:0008234 MF: cysteine-type peptidase activity	G
HC	2A	674028807	681028807	QTL_2A_3	-	1	***	tr|J7GS39|J7GS39_9SOLN	Cysteine protease	PF08246: Cathepsin propeptide inhibitor domain (I29); PF00112: Papain family cysteine protease	IPR000169: Cysteine peptidase, cysteine active site; IPR000668: Peptidase C1A, papain C-terminal; IPR013201: Cathepsin propeptide inhibitor domain (I29); IPR025660: Cysteine peptidase, histidine active site	GO:0006508 BP: proteolysis;GO:0008234 MF: cysteine-type peptidase activity	G
LC	2A	674028807	681028807	QTL_2A_3	-	1	***	tr|A0A151SV91|A0A151SV91_CAJCA	Retrovirus-related Pol polyprotein from transposon TNT 1-94	PF07727: Reverse transcriptase (RNA-dependent DNA polymerase)	IPR012337: Ribonuclease H-like domain; IPR013103: Reverse transcriptase, RNA-dependent DNA polymerase	GO:0003676 MF: nucleic acid binding	TE
LC	2A	674028807	681028807	QTL_2A_3	-	1	***	tr|A0A1J3GXI4|A0A1J3GXI4_NOCCA	Retrovirus-related Pol polyprotein from transposon TNT 1-94	PF07727: Reverse transcriptase (RNA-dependent DNA polymerase)	IPR013103: Reverse transcriptase, RNA-dependent DNA polymerase		TE
LC	2A	674028807	681028807	QTL_2A_3	-	1	--*	AT1G01260.3	basic helix-loop-helix (bHLH) DNA-binding superfamily protein				G
HC	2A	674028807	681028807	QTL_2A_3	+	1	--*	sp|B2KI97|THOC2_RHIFE	THO complex subunit 2				G
HC	2A	674028807	681028807	QTL_2A_3	-	1	***	tr|J7GS39|J7GS39_9SOLN	Cysteine protease	PF08246: Cathepsin propeptide inhibitor domain (I29); PF00112: Papain family cysteine protease	IPR000668: Peptidase C1A, papain C-terminal; IPR013201: Cathepsin propeptide inhibitor domain (I29); IPR025660: Cysteine peptidase, histidine active site	GO:0006508 BP: proteolysis;GO:0008234 MF: cysteine-type peptidase activity	G
HC	2A	674028807	681028807	QTL_2A_3	-	1	***	tr|J7GS39|J7GS39_9SOLN	Cysteine protease	PF08246: Cathepsin propeptide inhibitor domain (I29); PF00112: Papain family cysteine protease	IPR000668: Peptidase C1A, papain C-terminal; IPR013201: Cathepsin propeptide inhibitor domain (I29); IPR025660: Cysteine peptidase, histidine active site	GO:0006508 BP: proteolysis;GO:0008234 MF: cysteine-type peptidase activity	G
LC	2A	674028807	681028807	QTL_2A_3	+	1	*-*	tr|Q2R0C2|Q2R0C2_ORYSJ	Transposon protein, putative, Mutator sub-class	PF03108: MuDR family transposase	IPR004332: Transposase, MuDR, plant		TE
LC	2A	674028807	681028807	QTL_2A_3	+	1	*-*	tr|Q10PZ8|Q10PZ8_ORYSJ	Transposon protein, putative, Mutator sub-class	PF10551: MULE transposase domain	IPR001207: Transposase, mutator type; IPR018289: MULE transposase domain	GO:0003677 MF: DNA binding;GO:0004803 MF: transposase activity;GO:0006313 BP: transposition, DNA-mediated	TE
LC	2A	674028807	681028807	QTL_2A_3	+	1	*-*	tr|Q10PZ8|Q10PZ8_ORYSJ	Transposon protein, putative, Mutator sub-class	PF10551: MULE transposase domain	IPR001207: Transposase, mutator type; IPR018289: MULE transposase domain	GO:0003677 MF: DNA binding;GO:0004803 MF: transposase activity;GO:0006313 BP: transposition, DNA-mediated	TE
LC	2A	674028807	681028807	QTL_2A_3	+	1	*-*	tr|Q10PZ8|Q10PZ8_ORYSJ	Transposon protein, putative, Mutator sub-class	PF10551: MULE transposase domain	IPR001207: Transposase, mutator type; IPR018289: MULE transposase domain	GO:0003677 MF: DNA binding;GO:0004803 MF: transposase activity;GO:0006313 BP: transposition, DNA-mediated	TE
LC	2A	674028807	681028807	QTL_2A_3	+	1	*-*	tr|Q10I16|Q10I16_ORYSJ	Transposon protein, putative, Mutator sub-class		IPR001878: Zinc finger, CCHC-type	GO:0003676 MF: nucleic acid binding;GO:0008270 MF: zinc ion binding	TE
LC	2A	674028807	681028807	QTL_2A_3	+	1	*-*	tr|Q10I16|Q10I16_ORYSJ	Transposon protein, putative, Mutator sub-class		IPR001878: Zinc finger, CCHC-type	GO:0003676 MF: nucleic acid binding;GO:0008270 MF: zinc ion binding	TE
LC	2A	674028807	681028807	QTL_2A_3	-	1	--*	sp|O02670|KCNJ5_PIG	G protein-activated inward rectifier potassium channel 4				G
HC	2A	674028807	681028807	QTL_2A_3	-	1	--*	tr|Q2R399|Q2R399_ORYSJ	GRF zinc finger family protein	PF06839: GRF zinc finger	IPR010666: Zinc finger, GRF-type	GO:0008270 MF: zinc ion binding	TE?
HC	2A	674028807	681028807	QTL_2A_3	+	1	***	tr|B9S1Z5|B9S1Z5_RICCO	Cytochrome P450, putative	PF00067: Cytochrome P450	IPR001128: Cytochrome P450; IPR002401: Cytochrome P450, E-class, group I; IPR017972: Cytochrome P450, conserved site	GO:0005506 MF: iron ion binding;GO:0016705 MF: oxidoreductase activity, acting on paired donors, with incorporation or reduction of molecular oxygen;GO:0020037 MF: heme binding;GO:0055114 BP: oxidation-reduction process	G
HC	2A	674028807	681028807	QTL_2A_3	+	1	***	tr|B9S1Z5|B9S1Z5_RICCO	Cytochrome P450, putative	PF00067: Cytochrome P450	IPR001128: Cytochrome P450; IPR002401: Cytochrome P450, E-class, group I; IPR017972: Cytochrome P450, conserved site	GO:0005506 MF: iron ion binding;GO:0016705 MF: oxidoreductase activity, acting on paired donors, with incorporation or reduction of molecular oxygen;GO:0020037 MF: heme binding;GO:0055114 BP: oxidation-reduction process	G
HC	2A	674028807	681028807	QTL_2A_3	+	1	***	tr|B9S1Z5|B9S1Z5_RICCO	Cytochrome P450, putative	PF00067: Cytochrome P450	IPR001128: Cytochrome P450; IPR002401: Cytochrome P450, E-class, group I; IPR017972: Cytochrome P450, conserved site	GO:0005506 MF: iron ion binding;GO:0016705 MF: oxidoreductase activity, acting on paired donors, with incorporation or reduction of molecular oxygen;GO:0020037 MF: heme binding;GO:0055114 BP: oxidation-reduction process	G
HC	2A	674028807	681028807	QTL_2A_3	+	1	***	tr|B9S1Z5|B9S1Z5_RICCO	Cytochrome P450, putative	PF00067: Cytochrome P450	IPR001128: Cytochrome P450; IPR002401: Cytochrome P450, E-class, group I; IPR017972: Cytochrome P450, conserved site	GO:0005506 MF: iron ion binding;GO:0016705 MF: oxidoreductase activity, acting on paired donors, with incorporation or reduction of molecular oxygen;GO:0020037 MF: heme binding;GO:0055114 BP: oxidation-reduction process	G
HC	2A	674028807	681028807	QTL_2A_3	-	0	***	tr|G7IA45|G7IA45_MEDTR	MADS-box transcription factor	PF00319: SRF-type transcription factor (DNA-binding and dimerisation domain); PF01486: K-box region	IPR002100: Transcription factor, MADS-box; IPR002487: Transcription factor, K-box	GO:0003677 MF: DNA binding;GO:0003700 MF: transcription factor activity, sequence-specific DNA binding;GO:0005634 CC: nucleus;GO:0006355 BP: regulation of transcription, DNA-templated;GO:0046983 MF: protein dimerization activity	G
HC	2A	674028807	681028807	QTL_2A_3	-	0	***	tr|G7IA45|G7IA45_MEDTR	MADS-box transcription factor	PF00319: SRF-type transcription factor (DNA-binding and dimerisation domain); PF01486: K-box region	IPR002100: Transcription factor, MADS-box; IPR002487: Transcription factor, K-box	GO:0003677 MF: DNA binding;GO:0003700 MF: transcription factor activity, sequence-specific DNA binding;GO:0005634 CC: nucleus;GO:0006355 BP: regulation of transcription, DNA-templated;GO:0046983 MF: protein dimerization activity	G
HC	2A	674028807	681028807	QTL_2A_3	-	0	***	tr|G7IA45|G7IA45_MEDTR	MADS-box transcription factor	PF00319: SRF-type transcription factor (DNA-binding and dimerisation domain); PF01486: K-box region	IPR002100: Transcription factor, MADS-box; IPR002487: Transcription factor, K-box	GO:0003677 MF: DNA binding;GO:0003700 MF: transcription factor activity, sequence-specific DNA binding;GO:0005634 CC: nucleus;GO:0006355 BP: regulation of transcription, DNA-templated;GO:0046983 MF: protein dimerization activity	G
HC	2A	674028807	681028807	QTL_2A_3	-	0	***	tr|G7IA45|G7IA45_MEDTR	MADS-box transcription factor	PF00319: SRF-type transcription factor (DNA-binding and dimerisation domain); PF01486: K-box region	IPR002100: Transcription factor, MADS-box; IPR002487: Transcription factor, K-box	GO:0003677 MF: DNA binding;GO:0003700 MF: transcription factor activity, sequence-specific DNA binding;GO:0005634 CC: nucleus;GO:0006355 BP: regulation of transcription, DNA-templated;GO:0046983 MF: protein dimerization activity	G
HC	2A	674028807	681028807	QTL_2A_3	-	0	***	tr|G7IA45|G7IA45_MEDTR	MADS-box transcription factor	PF00319: SRF-type transcription factor (DNA-binding and dimerisation domain); PF01486: K-box region	IPR002100: Transcription factor, MADS-box; IPR002487: Transcription factor, K-box	GO:0003677 MF: DNA binding;GO:0003700 MF: transcription factor activity, sequence-specific DNA binding;GO:0005634 CC: nucleus;GO:0006355 BP: regulation of transcription, DNA-templated;GO:0046983 MF: protein dimerization activity	G
HC	2A	674028807	681028807	QTL_2A_3	-	1	***	tr|G7IA45|G7IA45_MEDTR	MADS-box transcription factor	PF00319: SRF-type transcription factor (DNA-binding and dimerisation domain); PF01486: K-box region	IPR002100: Transcription factor, MADS-box; IPR002487: Transcription factor, K-box	GO:0003677 MF: DNA binding;GO:0003700 MF: transcription factor activity, sequence-specific DNA binding;GO:0005634 CC: nucleus;GO:0006355 BP: regulation of transcription, DNA-templated;GO:0046983 MF: protein dimerization activity	G
HC	2A	674028807	681028807	QTL_2A_3	-	1	***	tr|G7IA45|G7IA45_MEDTR	MADS-box transcription factor	PF00319: SRF-type transcription factor (DNA-binding and dimerisation domain); PF01486: K-box region	IPR002100: Transcription factor, MADS-box; IPR002487: Transcription factor, K-box	GO:0003677 MF: DNA binding;GO:0003700 MF: transcription factor activity, sequence-specific DNA binding;GO:0005634 CC: nucleus;GO:0006355 BP: regulation of transcription, DNA-templated;GO:0046983 MF: protein dimerization activity	G
HC	2A	674028807	681028807	QTL_2A_3	-	1	***	tr|G7IA45|G7IA45_MEDTR	MADS-box transcription factor	PF00319: SRF-type transcription factor (DNA-binding and dimerisation domain); PF01486: K-box region	IPR002100: Transcription factor, MADS-box; IPR002487: Transcription factor, K-box	GO:0003677 MF: DNA binding;GO:0003700 MF: transcription factor activity, sequence-specific DNA binding;GO:0005634 CC: nucleus;GO:0006355 BP: regulation of transcription, DNA-templated;GO:0046983 MF: protein dimerization activity	G
HC	2A	674028807	681028807	QTL_2A_3	-	1	***	tr|G7IA45|G7IA45_MEDTR	MADS-box transcription factor	PF00319: SRF-type transcription factor (DNA-binding and dimerisation domain); PF01486: K-box region	IPR002100: Transcription factor, MADS-box; IPR002487: Transcription factor, K-box	GO:0003677 MF: DNA binding;GO:0003700 MF: transcription factor activity, sequence-specific DNA binding;GO:0005634 CC: nucleus;GO:0006355 BP: regulation of transcription, DNA-templated;GO:0046983 MF: protein dimerization activity	G
HC	2A	674028807	681028807	QTL_2A_3	-	1	***	tr|G7IA45|G7IA45_MEDTR	MADS-box transcription factor	PF00319: SRF-type transcription factor (DNA-binding and dimerisation domain); PF01486: K-box region	IPR002100: Transcription factor, MADS-box; IPR002487: Transcription factor, K-box	GO:0003677 MF: DNA binding;GO:0003700 MF: transcription factor activity, sequence-specific DNA binding;GO:0005634 CC: nucleus;GO:0006355 BP: regulation of transcription, DNA-templated;GO:0046983 MF: protein dimerization activity	G
HC	2A	674028807	681028807	QTL_2A_3	-	1	***	tr|I0YS34|I0YS34_COCSC	Dehydrogenase	PF13561: Enoyl-(Acyl carrier protein) reductase	IPR002347: Short-chain dehydrogenase/reductase SDR; IPR016040: NAD(P)-binding domain		G
HC	2A	674028807	681028807	QTL_2A_3	+	1	***	tr|R7WDP0|R7WDP0_AEGTA	Potassium transporter	PF02705: K+ potassium transporter	IPR003855: Potassium transporter	GO:0015079 MF: potassium ion transmembrane transporter activity;GO:0016020 CC: membrane;GO:0071805 BP: potassium ion transmembrane transport	G
HC	2A	674028807	681028807	QTL_2A_3	+	1	***	tr|R7WDP0|R7WDP0_AEGTA	Potassium transporter	PF02705: K+ potassium transporter	IPR003855: Potassium transporter	GO:0015079 MF: potassium ion transmembrane transporter activity;GO:0016020 CC: membrane;GO:0071805 BP: potassium ion transmembrane transport	G
HC	2A	674028807	681028807	QTL_2A_3	+	1	***	tr|R7WDP0|R7WDP0_AEGTA	Potassium transporter	PF02705: K+ potassium transporter	IPR003855: Potassium transporter	GO:0015079 MF: potassium ion transmembrane transporter activity;GO:0016020 CC: membrane;GO:0071805 BP: potassium ion transmembrane transport	G
HC	2A	674028807	681028807	QTL_2A_3	+	0	***	tr|R7WDP0|R7WDP0_AEGTA	Potassium transporter	PF02705: K+ potassium transporter	IPR003855: Potassium transporter	GO:0015079 MF: potassium ion transmembrane transporter activity;GO:0016020 CC: membrane;GO:0071805 BP: potassium ion transmembrane transport	G
HC	2A	674028807	681028807	QTL_2A_3	+	0	***	tr|R7WDP0|R7WDP0_AEGTA	Potassium transporter	PF02705: K+ potassium transporter	IPR003855: Potassium transporter	GO:0015079 MF: potassium ion transmembrane transporter activity;GO:0016020 CC: membrane;GO:0071805 BP: potassium ion transmembrane transport	G
HC	2A	674028807	681028807	QTL_2A_3	+	0	***	tr|R7WDP0|R7WDP0_AEGTA	Potassium transporter	PF02705: K+ potassium transporter	IPR003855: Potassium transporter	GO:0015079 MF: potassium ion transmembrane transporter activity;GO:0016020 CC: membrane;GO:0071805 BP: potassium ion transmembrane transport	G
HC	2A	674028807	681028807	QTL_2A_3	-	1	--*	tr|A0A1D1YGX8|A0A1D1YGX8_9ARAE	DNA topoisomerase	PF06839: GRF zinc finger	IPR010666: Zinc finger, GRF-type	GO:0008270 MF: zinc ion binding	G
LC	2A	674028807	681028807	QTL_2A_3	+	1	***	tr|R7WFH9|R7WFH9_AEGTA	F-box protein	PF00646: F-box domain	IPR001810: F-box domain; IPR015915: Kelch-type beta propeller	GO:0005515 MF: protein binding	TE?
LC	2A	674028807	681028807	QTL_2A_3	+	1	--*	tr|Q2HVU8|Q2HVU8_MEDTR	Polynucleotidyl transferase, Ribonuclease H fold	PF13456: Reverse transcriptase-like	IPR012337: Ribonuclease H-like domain	GO:0003676 MF: nucleic acid binding	TE
LC	2A	674028807	681028807	QTL_2A_3	+	1	--*	AT5G58940.4	calmodulin-binding receptor-like cytoplasmic kinase 1				G
LC	2A	674028807	681028807	QTL_2A_3	-	1	*-*	tr|Q2QS77|Q2QS77_ORYSJ	Retrotransposon protein, putative, unclassified	PF13966: zinc-binding in reverse transcriptase	IPR026960: Reverse transcriptase zinc-binding domain		TE
LC	2A	674028807	681028807	QTL_2A_3	+	1	***	tr|A0A059Q035|A0A059Q035_9POAL	SKP1-like protein	PF03931: Skp1 family, tetramerisation domain; PF01466: Skp1 family, dimerisation domain	IPR001232: S-phase kinase-associated protein 1-like; IPR011333: SKP1/BTB/POZ domain; IPR016072: SKP1 component, dimerisation; IPR016073: SKP1 component, POZ domain; IPR016897: S-phase kinase-associated protein 1	GO:0006511 BP: ubiquitin-dependent protein catabolic process	G
LC	2A	674028807	681028807	QTL_2A_3	-	1	*-*	tr|Q10D55|Q10D55_ORYSJ	Retrotransposon protein, putative, unclassified	PF00078: Reverse transcriptase (RNA-dependent DNA polymerase)	IPR000477: Reverse transcriptase domain		TE
LC	2A	674028807	681028807	QTL_2A_3	-	1	--*	sp|Q6BKL0|EAF7_DEBHA	Chromatin modification-related protein EAF7				G
LC	2A	674028807	681028807	QTL_2A_3	-	1	--*	tr|A0A151QNJ8|A0A151QNJ8_CAJCA	Gag polyprotein		IPR001878: Zinc finger, CCHC-type	GO:0003676 MF: nucleic acid binding;GO:0008270 MF: zinc ion binding	TE
LC	2A	674028807	681028807	QTL_2A_3	-	1	--*	tr|A0A151QNJ8|A0A151QNJ8_CAJCA	Gag polyprotein		IPR001878: Zinc finger, CCHC-type	GO:0003676 MF: nucleic acid binding;GO:0008270 MF: zinc ion binding	TE
LC	2A	674028807	681028807	QTL_2A_3	+	1	*-*	tr|Q2R3J1|Q2R3J1_ORYSJ	Transposon protein, putative, Mutator sub-class				TE
LC	2A	674028807	681028807	QTL_2A_3	-	1	--*	tr|Q2QXT9|Q2QXT9_ORYSJ	GRF zinc finger family protein				TE?
LC	2A	674028807	681028807	QTL_2A_3	+	1	--*	sp|Q07120|GFI1_RAT	Zinc finger protein Gfi-1				TE?
LC	2A	674028807	681028807	QTL_2A_3	+	1	--*	AT3G46500.8	2-oxoglutarate (2OG) and Fe(II)-dependent oxygenase superfamily protein				G
LC	2A	674028807	681028807	QTL_2A_3	-	1	*-*	tr|Q2QQX5|Q2QQX5_ORYSJ	Transposon protein, putative, Mutator sub-class, expressed				TE
LC	2A	674028807	681028807	QTL_2A_3	+	1	--*	AT5G55820.4	inner centromere protein, ARK-binding region protein				G
LC	2A	674028807	681028807	QTL_2A_3	+	1	--*	AT1G08130.1	DNA ligase 1				G
HC	2A	674028807	681028807	QTL_2A_3	-	1	--*	tr|A0A0J8B8I8|A0A0J8B8I8_BETVU	DNA topoisomerase				G
LC	2A	674028807	681028807	QTL_2A_3	+	1	--*	AT1G78100.1	F-box family protein	PF12937: F-box-like	IPR001810: F-box domain	GO:0005515 MF: protein binding	TE?
LC	2A	674028807	681028807	QTL_2A_3	-	1	--*	AT5G14220.4	Flavin containing amine oxidoreductase family				G
HC	2A	674028807	681028807	QTL_2A_3	-	1	*-*	tr|Q2R3K8|Q2R3K8_ORYSJ	Armadillo/beta-catenin-like repeat family protein, expressed		IPR000225: Armadillo; IPR011989: Armadillo-like helical; IPR016024: Armadillo-type fold	GO:0005488 MF: binding;GO:0005515 MF: protein binding	G
HC	2A	674028807	681028807	QTL_2A_3	-	1	*-*	tr|Q2R3K8|Q2R3K8_ORYSJ	Armadillo/beta-catenin-like repeat family protein, expressed		IPR000225: Armadillo; IPR011989: Armadillo-like helical; IPR016024: Armadillo-type fold	GO:0005488 MF: binding;GO:0005515 MF: protein binding	G
LC	2A	674028807	681028807	QTL_2A_3	+	1	--*	sp|A6H584|CO6A5_MOUSE	Collagen alpha-5(VI) chain				G
LC	2A	674028807	681028807	QTL_2A_3	+	1	--*	AT5G40520.2	DNA double-strand break repair protein				G
LC	2A	674028807	681028807	QTL_2A_3	-	1	*-*	tr|Q2R2A0|Q2R2A0_ORYSJ	Retrotransposon protein, putative, unclassified				TE
LC	2A	674028807	681028807	QTL_2A_3	+	1	--*	AT5G39250.2	F-box family protein	PF12937: F-box-like	IPR001810: F-box domain	GO:0005515 MF: protein binding	TE?
HC	2A	674028807	681028807	QTL_2A_3	+	1	--*	AT5G07610.1	F-box family protein	PF12937: F-box-like	IPR001810: F-box domain	GO:0005515 MF: protein binding	TE?
HC	2A	674028807	681028807	QTL_2A_3	-	1	*-*	tr|Q8W153|Q8W153_ORYSJ	Polyprotein	PF14223: gag-polypeptide of LTR copia-type	IPR001878: Zinc finger, CCHC-type	GO:0003676 MF: nucleic acid binding;GO:0008270 MF: zinc ion binding	TE
HC	2A	674028807	681028807	QTL_2A_3	-	1	*-*	tr|Q8W153|Q8W153_ORYSJ	Polyprotein	PF14223: gag-polypeptide of LTR copia-type	IPR001878: Zinc finger, CCHC-type	GO:0003676 MF: nucleic acid binding;GO:0008270 MF: zinc ion binding	TE
HC	2A	674028807	681028807	QTL_2A_3	+	1	--*	AT5G51040.4	succinate dehydrogenase assembly factor				G
LC	2A	674028807	681028807	QTL_2A_3	+	0	--*	sp|Q3JSI8|RBSA1_BURP1	Ribose import ATP-binding protein RbsA 1				G
LC	2A	674028807	681028807	QTL_2A_3	+	0	--*	sp|C4XGW8|NUON2_DESMR	NADH-quinone oxidoreductase subunit N 2				G
LC	2A	674028807	681028807	QTL_2A_3	+	0	--*	AT4G39630.2	translation initiation factor				G
LC	2A	674028807	681028807	QTL_2A_3	+	1	--*	AT1G74360.1	Leucine-rich repeat protein kinase family protein				G
LC	2A	674028807	681028807	QTL_2A_3	+	0	--*	sp|I0IUP3|MCM8_CHICK	DNA helicase MCM8				TE?
LC	2A	674028807	681028807	QTL_2A_3	+	0	--*	AT1G52580.1	RHOMBOID-like protein 5				G
HC	2A	674028807	681028807	QTL_2A_3	+	1	***	tr|M8ATB2|M8ATB2_AEGTA	Pathogenesis-related protein 1	PF00407: Pathogenesis-related protein Bet v I family	IPR000916: Bet v I/Major latex protein; IPR023393: START-like domain; IPR024949: Bet v I type allergen	GO:0006952 BP: defense response;GO:0009607 BP: response to biotic stimulus	G
HC	2A	674028807	681028807	QTL_2A_3	+	1	***	tr|M8ATB2|M8ATB2_AEGTA	Pathogenesis-related protein 1	PF00407: Pathogenesis-related protein Bet v I family	IPR000916: Bet v I/Major latex protein; IPR023393: START-like domain; IPR024949: Bet v I type allergen	GO:0006952 BP: defense response;GO:0009607 BP: response to biotic stimulus	G
HC	2A	674028807	681028807	QTL_2A_3	+	1	*-*	tr|A0A072U5A2|A0A072U5A2_MEDTR	Methyl-CpG-binding domain protein	PF01429: Methyl-CpG binding domain	IPR001739: Methyl-CpG DNA binding; IPR016177: DNA-binding domain	GO:0003677 MF: DNA binding;GO:0005634 CC: nucleus	G
HC	2A	674028807	681028807	QTL_2A_3	+	1	*-*	tr|A0A072U5A2|A0A072U5A2_MEDTR	Methyl-CpG-binding domain protein	PF01429: Methyl-CpG binding domain	IPR001739: Methyl-CpG DNA binding; IPR016177: DNA-binding domain	GO:0003677 MF: DNA binding;GO:0005634 CC: nucleus	G
HC	2A	674028807	681028807	QTL_2A_3	+	0	***	tr|B4FRH7|B4FRH7_MAIZE	UDP-N-acetylglucosamine pyrophosphorylase	PF01704: UTP--glucose-1-phosphate uridylyltransferase	IPR002618: UDPGP family; IPR029044: Nucleotide-diphospho-sugar transferases	GO:0008152 BP: metabolic process;GO:0070569 MF: uridylyltransferase activity	G
HC	2A	674028807	681028807	QTL_2A_3	+	0	***	tr|B4FRH7|B4FRH7_MAIZE	UDP-N-acetylglucosamine pyrophosphorylase	PF01704: UTP--glucose-1-phosphate uridylyltransferase	IPR002618: UDPGP family; IPR029044: Nucleotide-diphospho-sugar transferases	GO:0008152 BP: metabolic process;GO:0070569 MF: uridylyltransferase activity	G
HC	2A	674028807	681028807	QTL_2A_3	+	0	***	tr|B4FRH7|B4FRH7_MAIZE	UDP-N-acetylglucosamine pyrophosphorylase	PF01704: UTP--glucose-1-phosphate uridylyltransferase	IPR002618: UDPGP family; IPR029044: Nucleotide-diphospho-sugar transferases	GO:0008152 BP: metabolic process;GO:0070569 MF: uridylyltransferase activity	G
HC	2A	674028807	681028807	QTL_2A_3	+	0	***	tr|B4FRH7|B4FRH7_MAIZE	UDP-N-acetylglucosamine pyrophosphorylase	PF01704: UTP--glucose-1-phosphate uridylyltransferase	IPR002618: UDPGP family; IPR029044: Nucleotide-diphospho-sugar transferases	GO:0008152 BP: metabolic process;GO:0070569 MF: uridylyltransferase activity	G
HC	2A	674028807	681028807	QTL_2A_3	+	1	***	tr|B4FRH7|B4FRH7_MAIZE	UDP-N-acetylglucosamine pyrophosphorylase	PF01704: UTP--glucose-1-phosphate uridylyltransferase	IPR002618: UDPGP family; IPR029044: Nucleotide-diphospho-sugar transferases	GO:0008152 BP: metabolic process;GO:0070569 MF: uridylyltransferase activity	G
HC	2A	674028807	681028807	QTL_2A_3	+	1	***	tr|B4FRH7|B4FRH7_MAIZE	UDP-N-acetylglucosamine pyrophosphorylase	PF01704: UTP--glucose-1-phosphate uridylyltransferase	IPR002618: UDPGP family; IPR029044: Nucleotide-diphospho-sugar transferases	GO:0008152 BP: metabolic process;GO:0070569 MF: uridylyltransferase activity	G
LC	2A	674028807	681028807	QTL_2A_3	-	1	***	sp|Q8TW21|RS17_METKA	30S ribosomal protein S17	PF16205: Ribosomal_S17 N-terminal; PF00366: Ribosomal protein S17	IPR000266: Ribosomal protein S17/S11; IPR012340: Nucleic acid-binding, OB-fold; IPR019979: Ribosomal protein S17, conserved site; IPR028333: Ribosomal protein S17, archaeal/eukaryotic; IPR032440: 40S ribosomal protein S11, N-terminal	GO:0003735 MF: structural constituent of ribosome;GO:0005622 CC: intracellular;GO:0005840 CC: ribosome;GO:0006412 BP: translation	G
LC	2A	674028807	681028807	QTL_2A_3	-	1	***	sp|Q8TW21|RS17_METKA	30S ribosomal protein S17	PF16205: Ribosomal_S17 N-terminal; PF00366: Ribosomal protein S17	IPR000266: Ribosomal protein S17/S11; IPR012340: Nucleic acid-binding, OB-fold; IPR019979: Ribosomal protein S17, conserved site; IPR028333: Ribosomal protein S17, archaeal/eukaryotic; IPR032440: 40S ribosomal protein S11, N-terminal	GO:0003735 MF: structural constituent of ribosome;GO:0005622 CC: intracellular;GO:0005840 CC: ribosome;GO:0006412 BP: translation	G
LC	2A	674028807	681028807	QTL_2A_3	-	1	***	sp|Q8TW21|RS17_METKA	30S ribosomal protein S17	PF16205: Ribosomal_S17 N-terminal; PF00366: Ribosomal protein S17	IPR000266: Ribosomal protein S17/S11; IPR012340: Nucleic acid-binding, OB-fold; IPR019979: Ribosomal protein S17, conserved site; IPR028333: Ribosomal protein S17, archaeal/eukaryotic; IPR032440: 40S ribosomal protein S11, N-terminal	GO:0003735 MF: structural constituent of ribosome;GO:0005622 CC: intracellular;GO:0005840 CC: ribosome;GO:0006412 BP: translation	G
LC	2A	674028807	681028807	QTL_2A_3	-	1	***	sp|Q8TW21|RS17_METKA	30S ribosomal protein S17	PF16205: Ribosomal_S17 N-terminal; PF00366: Ribosomal protein S17	IPR000266: Ribosomal protein S17/S11; IPR012340: Nucleic acid-binding, OB-fold; IPR019979: Ribosomal protein S17, conserved site; IPR028333: Ribosomal protein S17, archaeal/eukaryotic; IPR032440: 40S ribosomal protein S11, N-terminal	GO:0003735 MF: structural constituent of ribosome;GO:0005622 CC: intracellular;GO:0005840 CC: ribosome;GO:0006412 BP: translation	G
HC	2A	674028807	681028807	QTL_2A_3	+	1	***	tr|Q10CF3|Q10CF3_ORYSJ	Cell differentiation protein rcd1, putative, expressed	PF04078: Cell differentiation family, Rcd1-like	IPR011989: Armadillo-like helical; IPR016024: Armadillo-type fold	GO:0005488 MF: binding	G
HC	2A	674028807	681028807	QTL_2A_3	+	0	***	tr|Q10CF3|Q10CF3_ORYSJ	Cell differentiation protein rcd1, putative, expressed	PF04078: Cell differentiation family, Rcd1-like	IPR011989: Armadillo-like helical; IPR016024: Armadillo-type fold	GO:0005488 MF: binding	G
HC	2A	674028807	681028807	QTL_2A_3	+	1	--*	tr|C5XTX1|C5XTX1_SORBI	L-aspartate oxidase	PF10184: Uncharacterized conserved protein (DUF2358)	IPR018790: Protein of unknown function DUF2358; IPR032710: NTF2-like domain		G
HC	2A	674028807	681028807	QTL_2A_3	+	1	***	tr|A0A061DKE9|A0A061DKE9_THECC	Leucine-rich repeat receptor protein kinase family protein	PF08263: Leucine rich repeat N-terminal domain; PF00560: Leucine Rich Repeat; PF13855: Leucine rich repeat	IPR001611: Leucine-rich repeat; IPR013210: Leucine-rich repeat-containing N-terminal, plant-type; IPR032675: Leucine-rich repeat domain, L domain-like	GO:0005515 MF: protein binding	G
HC	2A	674028807	681028807	QTL_2A_3	-	1	***	tr|A0A1E5WJN5|A0A1E5WJN5_9POAL	Polygalacturonase QRT3	PF12708: Pectate lyase superfamily protein	IPR006626: Parallel beta-helix repeat; IPR011050: Pectin lyase fold/virulence factor; IPR012334: Pectin lyase fold; IPR024535: Pectate lyase superfamily protein		G
HC	2A	674028807	681028807	QTL_2A_3	+	1	--*	sp|Q7N7B4|XGPT_PHOLL	Xanthine phosphoribosyltransferase				G
LC	2A	674028807	681028807	QTL_2A_3	+	1	*-*	tr|Q10QB9|Q10QB9_ORYSJ	Retrotransposon protein, putative, LINE subclass, expressed				TE
LC	2A	674028807	681028807	QTL_2A_3	+	1	--*	AT3G03770.3	Leucine-rich repeat protein kinase family protein				G
LC	2A	674028807	681028807	QTL_2A_3	-	1	***	tr|Q2QXK8|Q2QXK8_ORYSJ	Transposon protein, putative, Mutator sub-class	PF03108: MuDR family transposase	IPR004332: Transposase, MuDR, plant		TE
HC	2A	674028807	681028807	QTL_2A_3	-	1	*-*	AT2G33200.1	F-box family protein	PF03478: Protein of unknown function (DUF295)	IPR005174: Domain unknown function DUF295		TE?
HC	2A	674028807	681028807	QTL_2A_3	+	0	***	tr|F6JX90|F6JX90_MAIZE	Zinc transporter	PF02535: ZIP Zinc transporter	IPR003689: Zinc/iron permease; IPR004698: Zinc/iron permease, fungal/plant	GO:0005385 MF: zinc ion transmembrane transporter activity;GO:0016020 CC: membrane;GO:0016021 CC: integral component of membrane;GO:0030001 BP: metal ion transport;GO:0046873 MF: metal ion transmembrane transporter activity;GO:0055085 BP: transmembrane transport;GO:0071577 BP: zinc II ion transmembrane transport	G
HC	2A	674028807	681028807	QTL_2A_3	+	0	***	tr|F6JX90|F6JX90_MAIZE	Zinc transporter	PF02535: ZIP Zinc transporter	IPR003689: Zinc/iron permease; IPR004698: Zinc/iron permease, fungal/plant	GO:0005385 MF: zinc ion transmembrane transporter activity;GO:0016020 CC: membrane;GO:0016021 CC: integral component of membrane;GO:0030001 BP: metal ion transport;GO:0046873 MF: metal ion transmembrane transporter activity;GO:0055085 BP: transmembrane transport;GO:0071577 BP: zinc II ion transmembrane transport	G
HC	2A	674028807	681028807	QTL_2A_3	+	0	***	tr|F6JX90|F6JX90_MAIZE	Zinc transporter	PF02535: ZIP Zinc transporter	IPR003689: Zinc/iron permease; IPR004698: Zinc/iron permease, fungal/plant	GO:0005385 MF: zinc ion transmembrane transporter activity;GO:0016020 CC: membrane;GO:0016021 CC: integral component of membrane;GO:0030001 BP: metal ion transport;GO:0046873 MF: metal ion transmembrane transporter activity;GO:0055085 BP: transmembrane transport;GO:0071577 BP: zinc II ion transmembrane transport	G
HC	2A	674028807	681028807	QTL_2A_3	+	0	***	tr|F6JX90|F6JX90_MAIZE	Zinc transporter	PF02535: ZIP Zinc transporter	IPR003689: Zinc/iron permease; IPR004698: Zinc/iron permease, fungal/plant	GO:0005385 MF: zinc ion transmembrane transporter activity;GO:0016020 CC: membrane;GO:0016021 CC: integral component of membrane;GO:0030001 BP: metal ion transport;GO:0046873 MF: metal ion transmembrane transporter activity;GO:0055085 BP: transmembrane transport;GO:0071577 BP: zinc II ion transmembrane transport	G
HC	2A	674028807	681028807	QTL_2A_3	+	0	***	tr|F6JX90|F6JX90_MAIZE	Zinc transporter	PF02535: ZIP Zinc transporter	IPR003689: Zinc/iron permease; IPR004698: Zinc/iron permease, fungal/plant	GO:0005385 MF: zinc ion transmembrane transporter activity;GO:0016020 CC: membrane;GO:0016021 CC: integral component of membrane;GO:0030001 BP: metal ion transport;GO:0046873 MF: metal ion transmembrane transporter activity;GO:0055085 BP: transmembrane transport;GO:0071577 BP: zinc II ion transmembrane transport	G
HC	2A	674028807	681028807	QTL_2A_3	+	0	***	tr|F6JX90|F6JX90_MAIZE	Zinc transporter	PF02535: ZIP Zinc transporter	IPR003689: Zinc/iron permease; IPR004698: Zinc/iron permease, fungal/plant	GO:0005385 MF: zinc ion transmembrane transporter activity;GO:0016020 CC: membrane;GO:0016021 CC: integral component of membrane;GO:0030001 BP: metal ion transport;GO:0046873 MF: metal ion transmembrane transporter activity;GO:0055085 BP: transmembrane transport;GO:0071577 BP: zinc II ion transmembrane transport	G
HC	2A	674028807	681028807	QTL_2A_3	+	0	***	tr|F6JX90|F6JX90_MAIZE	Zinc transporter	PF02535: ZIP Zinc transporter	IPR003689: Zinc/iron permease; IPR004698: Zinc/iron permease, fungal/plant	GO:0005385 MF: zinc ion transmembrane transporter activity;GO:0016020 CC: membrane;GO:0016021 CC: integral component of membrane;GO:0030001 BP: metal ion transport;GO:0046873 MF: metal ion transmembrane transporter activity;GO:0055085 BP: transmembrane transport;GO:0071577 BP: zinc II ion transmembrane transport	G
HC	2A	674028807	681028807	QTL_2A_3	+	1	***	tr|F6JX90|F6JX90_MAIZE	Zinc transporter	PF02535: ZIP Zinc transporter	IPR003689: Zinc/iron permease; IPR004698: Zinc/iron permease, fungal/plant	GO:0005385 MF: zinc ion transmembrane transporter activity;GO:0016020 CC: membrane;GO:0016021 CC: integral component of membrane;GO:0030001 BP: metal ion transport;GO:0046873 MF: metal ion transmembrane transporter activity;GO:0055085 BP: transmembrane transport;GO:0071577 BP: zinc II ion transmembrane transport	G
HC	2A	674028807	681028807	QTL_2A_3	+	1	***	tr|F6JX90|F6JX90_MAIZE	Zinc transporter	PF02535: ZIP Zinc transporter	IPR003689: Zinc/iron permease; IPR004698: Zinc/iron permease, fungal/plant	GO:0005385 MF: zinc ion transmembrane transporter activity;GO:0016020 CC: membrane;GO:0016021 CC: integral component of membrane;GO:0030001 BP: metal ion transport;GO:0046873 MF: metal ion transmembrane transporter activity;GO:0055085 BP: transmembrane transport;GO:0071577 BP: zinc II ion transmembrane transport	G
HC	2A	674028807	681028807	QTL_2A_3	+	1	***	tr|F6JX90|F6JX90_MAIZE	Zinc transporter	PF02535: ZIP Zinc transporter	IPR003689: Zinc/iron permease; IPR004698: Zinc/iron permease, fungal/plant	GO:0005385 MF: zinc ion transmembrane transporter activity;GO:0016020 CC: membrane;GO:0016021 CC: integral component of membrane;GO:0030001 BP: metal ion transport;GO:0046873 MF: metal ion transmembrane transporter activity;GO:0055085 BP: transmembrane transport;GO:0071577 BP: zinc II ion transmembrane transport	G
HC	2A	674028807	681028807	QTL_2A_3	+	1	***	tr|F6JX90|F6JX90_MAIZE	Zinc transporter	PF02535: ZIP Zinc transporter	IPR003689: Zinc/iron permease; IPR004698: Zinc/iron permease, fungal/plant	GO:0005385 MF: zinc ion transmembrane transporter activity;GO:0016020 CC: membrane;GO:0016021 CC: integral component of membrane;GO:0030001 BP: metal ion transport;GO:0046873 MF: metal ion transmembrane transporter activity;GO:0055085 BP: transmembrane transport;GO:0071577 BP: zinc II ion transmembrane transport	G
HC	2A	674028807	681028807	QTL_2A_3	+	1	***	tr|F6JX90|F6JX90_MAIZE	Zinc transporter	PF02535: ZIP Zinc transporter	IPR003689: Zinc/iron permease; IPR004698: Zinc/iron permease, fungal/plant	GO:0005385 MF: zinc ion transmembrane transporter activity;GO:0016020 CC: membrane;GO:0016021 CC: integral component of membrane;GO:0030001 BP: metal ion transport;GO:0046873 MF: metal ion transmembrane transporter activity;GO:0055085 BP: transmembrane transport;GO:0071577 BP: zinc II ion transmembrane transport	G
HC	2A	674028807	681028807	QTL_2A_3	+	1	***	tr|F6JX90|F6JX90_MAIZE	Zinc transporter	PF02535: ZIP Zinc transporter	IPR003689: Zinc/iron permease; IPR004698: Zinc/iron permease, fungal/plant	GO:0005385 MF: zinc ion transmembrane transporter activity;GO:0016020 CC: membrane;GO:0016021 CC: integral component of membrane;GO:0030001 BP: metal ion transport;GO:0046873 MF: metal ion transmembrane transporter activity;GO:0055085 BP: transmembrane transport;GO:0071577 BP: zinc II ion transmembrane transport	G
HC	2A	674028807	681028807	QTL_2A_3	+	1	***	tr|F6JX90|F6JX90_MAIZE	Zinc transporter	PF02535: ZIP Zinc transporter	IPR003689: Zinc/iron permease; IPR004698: Zinc/iron permease, fungal/plant	GO:0005385 MF: zinc ion transmembrane transporter activity;GO:0016020 CC: membrane;GO:0016021 CC: integral component of membrane;GO:0030001 BP: metal ion transport;GO:0046873 MF: metal ion transmembrane transporter activity;GO:0055085 BP: transmembrane transport;GO:0071577 BP: zinc II ion transmembrane transport	G
HC	2A	674028807	681028807	QTL_2A_3	-	1	***	tr|W5AYG2|W5AYG2_WHEAT	Vacuolar ATPase assembly integral membrane protein VMA21 homolog	PF09446: VMA21-like domain	IPR019013: Vacuolar ATPase assembly integral membrane protein Vma21	GO:0070072 BP: vacuolar proton-transporting V-type ATPase complex assembly	G
HC	2A	674028807	681028807	QTL_2A_3	+	1	***	tr|A0A1E5WIY9|A0A1E5WIY9_9POAL	Pentatricopeptide repeat-containing protein	PF01535: PPR repeat; PF17177: Pentacotripeptide-repeat region of PROPR	IPR002625: Smr domain; IPR002885: Pentatricopeptide repeat; IPR033443: Pentacotripeptide-repeat region of PROPR		G
HC	2A	674028807	681028807	QTL_2A_3	-	1	***	tr|Q9AVQ2|Q9AVQ2_SOLTU	Cytochrome P450	PF00067: Cytochrome P450	IPR001128: Cytochrome P450; IPR002401: Cytochrome P450, E-class, group I; IPR017972: Cytochrome P450, conserved site	GO:0005506 MF: iron ion binding;GO:0016705 MF: oxidoreductase activity, acting on paired donors, with incorporation or reduction of molecular oxygen;GO:0020037 MF: heme binding;GO:0055114 BP: oxidation-reduction process	G
HC	2A	674028807	681028807	QTL_2A_3	-	1	***	tr|Q9AVQ2|Q9AVQ2_SOLTU	Cytochrome P450	PF00067: Cytochrome P450	IPR001128: Cytochrome P450; IPR002401: Cytochrome P450, E-class, group I; IPR017972: Cytochrome P450, conserved site	GO:0005506 MF: iron ion binding;GO:0016705 MF: oxidoreductase activity, acting on paired donors, with incorporation or reduction of molecular oxygen;GO:0020037 MF: heme binding;GO:0055114 BP: oxidation-reduction process	G
HC	2A	674028807	681028807	QTL_2A_3	-	1	***	tr|Q9AVQ2|Q9AVQ2_SOLTU	Cytochrome P450	PF00067: Cytochrome P450	IPR001128: Cytochrome P450; IPR002401: Cytochrome P450, E-class, group I; IPR017972: Cytochrome P450, conserved site	GO:0005506 MF: iron ion binding;GO:0016705 MF: oxidoreductase activity, acting on paired donors, with incorporation or reduction of molecular oxygen;GO:0020037 MF: heme binding;GO:0055114 BP: oxidation-reduction process	G
HC	2A	674028807	681028807	QTL_2A_3	-	1	***	tr|Q9AVQ2|Q9AVQ2_SOLTU	Cytochrome P450	PF00067: Cytochrome P450	IPR001128: Cytochrome P450; IPR002401: Cytochrome P450, E-class, group I; IPR017972: Cytochrome P450, conserved site	GO:0005506 MF: iron ion binding;GO:0016705 MF: oxidoreductase activity, acting on paired donors, with incorporation or reduction of molecular oxygen;GO:0020037 MF: heme binding;GO:0055114 BP: oxidation-reduction process	G
HC	2A	674028807	681028807	QTL_2A_3	-	1	***	tr|B9T7R7|B9T7R7_RICCO	Alcohol dehydrogenase, putative	PF08240: Alcohol dehydrogenase GroES-like domain; PF00107: Zinc-binding dehydrogenase	IPR002328: Alcohol dehydrogenase, zinc-type, conserved site; IPR011032: GroES-like; IPR013149: Alcohol dehydrogenase, C-terminal; IPR013154: Alcohol dehydrogenase, N-terminal; IPR016040: NAD(P)-binding domain; IPR020843: Polyketide synthase, enoylreductase domain	GO:0008270 MF: zinc ion binding;GO:0016491 MF: oxidoreductase activity;GO:0055114 BP: oxidation-reduction process	G
HC	2A	674028807	681028807	QTL_2A_3	-	1	***	tr|B9T7R7|B9T7R7_RICCO	Alcohol dehydrogenase, putative	PF08240: Alcohol dehydrogenase GroES-like domain; PF00107: Zinc-binding dehydrogenase	IPR002328: Alcohol dehydrogenase, zinc-type, conserved site; IPR011032: GroES-like; IPR013149: Alcohol dehydrogenase, C-terminal; IPR013154: Alcohol dehydrogenase, N-terminal; IPR016040: NAD(P)-binding domain; IPR020843: Polyketide synthase, enoylreductase domain	GO:0008270 MF: zinc ion binding;GO:0016491 MF: oxidoreductase activity;GO:0055114 BP: oxidation-reduction process	G
HC	2A	674028807	681028807	QTL_2A_3	-	1	***	tr|B9T7R7|B9T7R7_RICCO	Alcohol dehydrogenase, putative	PF08240: Alcohol dehydrogenase GroES-like domain; PF00107: Zinc-binding dehydrogenase	IPR002328: Alcohol dehydrogenase, zinc-type, conserved site; IPR011032: GroES-like; IPR013149: Alcohol dehydrogenase, C-terminal; IPR013154: Alcohol dehydrogenase, N-terminal; IPR016040: NAD(P)-binding domain; IPR020843: Polyketide synthase, enoylreductase domain	GO:0008270 MF: zinc ion binding;GO:0016491 MF: oxidoreductase activity;GO:0055114 BP: oxidation-reduction process	G
LC	2A	674028807	681028807	QTL_2A_3	-	1	*-*	tr|Q2R263|Q2R263_ORYSJ	Retrotransposon protein, putative, unclassified	PF14111: Domain of unknown function (DUF4283)	IPR025558: Domain of unknown function DUF4283		TE
HC	2A	674028807	681028807	QTL_2A_3	+	0	***	tr|Q9M639|Q9M639_MAIZE	Coatomer subunit epsilon	PF04733: Coatomer epsilon subunit	IPR006822: Coatomer, epsilon subunit; IPR011990: Tetratricopeptide-like helical domain	GO:0005198 MF: structural molecule activity;GO:0005515 MF: protein binding;GO:0006890 BP: retrograde vesicle-mediated transport, Golgi to ER	G
HC	2A	674028807	681028807	QTL_2A_3	+	0	***	tr|Q9M639|Q9M639_MAIZE	Coatomer subunit epsilon	PF04733: Coatomer epsilon subunit	IPR006822: Coatomer, epsilon subunit; IPR011990: Tetratricopeptide-like helical domain	GO:0005198 MF: structural molecule activity;GO:0005515 MF: protein binding;GO:0006890 BP: retrograde vesicle-mediated transport, Golgi to ER	G
HC	2A	674028807	681028807	QTL_2A_3	+	0	***	tr|Q9M639|Q9M639_MAIZE	Coatomer subunit epsilon	PF04733: Coatomer epsilon subunit	IPR006822: Coatomer, epsilon subunit; IPR011990: Tetratricopeptide-like helical domain	GO:0005198 MF: structural molecule activity;GO:0005515 MF: protein binding;GO:0006890 BP: retrograde vesicle-mediated transport, Golgi to ER	G
HC	2A	674028807	681028807	QTL_2A_3	+	1	***	tr|B6SZK9|B6SZK9_MAIZE	Coatomer subunit epsilon	PF04733: Coatomer epsilon subunit	IPR006822: Coatomer, epsilon subunit; IPR011990: Tetratricopeptide-like helical domain	GO:0005198 MF: structural molecule activity;GO:0005515 MF: protein binding;GO:0006890 BP: retrograde vesicle-mediated transport, Golgi to ER	G
HC	2A	674028807	681028807	QTL_2A_3	+	1	***	tr|B6SZK9|B6SZK9_MAIZE	Coatomer subunit epsilon	PF04733: Coatomer epsilon subunit	IPR006822: Coatomer, epsilon subunit; IPR011990: Tetratricopeptide-like helical domain	GO:0005198 MF: structural molecule activity;GO:0005515 MF: protein binding;GO:0006890 BP: retrograde vesicle-mediated transport, Golgi to ER	G
HC	2A	674028807	681028807	QTL_2A_3	+	1	***	tr|B6SZK9|B6SZK9_MAIZE	Coatomer subunit epsilon	PF04733: Coatomer epsilon subunit	IPR006822: Coatomer, epsilon subunit; IPR011990: Tetratricopeptide-like helical domain	GO:0005198 MF: structural molecule activity;GO:0005515 MF: protein binding;GO:0006890 BP: retrograde vesicle-mediated transport, Golgi to ER	G
LC	2A	674028807	681028807	QTL_2A_3	+	1	--*	AT4G39140.5	RING/U-box superfamily protein				G
HC	2A	674028807	681028807	QTL_2A_3	-	1	***	tr|A0A0K9PBG0|A0A0K9PBG0_ZOSMR	Bifunctional inhibitor/lipid-transfer protein/seed storage 2Salbumin superfamily protein	PF14547: Hydrophobic seed protein	IPR016140: Bifunctional inhibitor/plant lipid transfer protein/seed storage helical domain; IPR027923: Hydrophobic seed protein		G
LC	2A	674028807	681028807	QTL_2A_3	-	1	*-*	tr|F4JJE3|F4JJE3_ARATH	Bifunctional inhibitor/lipid-transfer protein/seed storage 2S albumin-like protein	PF14547: Hydrophobic seed protein	IPR016140: Bifunctional inhibitor/plant lipid transfer protein/seed storage helical domain; IPR027923: Hydrophobic seed protein		G
HC	2A	674028807	681028807	QTL_2A_3	+	1	***	tr|M7YXU3|M7YXU3_TRIUA	Ribosome maturation protein SBDS	PF01172: Shwachman-Bodian-Diamond syndrome (SBDS) protein; PF09377: SBDS protein C-terminal domain	IPR002140: Ribosome maturation protein Sdo1/SBDS; IPR018023: Ribosome maturation protein SBDS, conserved site; IPR018978: Ribosome maturation protein SBDS, C-terminal; IPR019783: Ribosome maturation protein SBDS, N-terminal	GO:0042254 BP: ribosome biogenesis;GO:0042256 BP: mature ribosome assembly	G
HC	2A	674028807	681028807	QTL_2A_3	+	1	***	tr|M7YXU3|M7YXU3_TRIUA	Ribosome maturation protein SBDS	PF01172: Shwachman-Bodian-Diamond syndrome (SBDS) protein; PF09377: SBDS protein C-terminal domain	IPR002140: Ribosome maturation protein Sdo1/SBDS; IPR018023: Ribosome maturation protein SBDS, conserved site; IPR018978: Ribosome maturation protein SBDS, C-terminal; IPR019783: Ribosome maturation protein SBDS, N-terminal	GO:0042254 BP: ribosome biogenesis;GO:0042256 BP: mature ribosome assembly	G
HC	2A	674028807	681028807	QTL_2A_3	+	1	*-*	tr|A0A1D1XT36|A0A1D1XT36_9ARAE	Glucan endo-1,3-beta-glucosidase-like protein 3	PF07983: X8 domain	IPR012946: X8 domain		G
HC	2A	674028807	681028807	QTL_2A_3	-	1	***	tr|Q9XEI0|Q9XEI0_STERE	Kaurene synthase	PF01397: Terpene synthase, N-terminal domain; PF03936: Terpene synthase family, metal binding domain	IPR001906: Terpene synthase, N-terminal domain; IPR005630: Terpene synthase, metal-binding domain; IPR008930: Terpenoid cyclases/protein prenyltransferase alpha-alpha toroid; IPR008949: Isoprenoid synthase domain	GO:0000287 MF: magnesium ion binding;GO:0008152 BP: metabolic process;GO:0010333 MF: terpene synthase activity;GO:0016829 MF: lyase activity	G
HC	2A	674028807	681028807	QTL_2A_3	-	1	***	tr|Q9XEI0|Q9XEI0_STERE	Kaurene synthase	PF01397: Terpene synthase, N-terminal domain; PF03936: Terpene synthase family, metal binding domain	IPR001906: Terpene synthase, N-terminal domain; IPR005630: Terpene synthase, metal-binding domain; IPR008930: Terpenoid cyclases/protein prenyltransferase alpha-alpha toroid; IPR008949: Isoprenoid synthase domain	GO:0000287 MF: magnesium ion binding;GO:0008152 BP: metabolic process;GO:0010333 MF: terpene synthase activity;GO:0016829 MF: lyase activity	G
HC	2A	674028807	681028807	QTL_2A_3	-	1	***	tr|Q9XEI0|Q9XEI0_STERE	Kaurene synthase	PF01397: Terpene synthase, N-terminal domain; PF03936: Terpene synthase family, metal binding domain	IPR001906: Terpene synthase, N-terminal domain; IPR005630: Terpene synthase, metal-binding domain; IPR008930: Terpenoid cyclases/protein prenyltransferase alpha-alpha toroid; IPR008949: Isoprenoid synthase domain	GO:0000287 MF: magnesium ion binding;GO:0008152 BP: metabolic process;GO:0010333 MF: terpene synthase activity;GO:0016829 MF: lyase activity	G
HC	2A	674028807	681028807	QTL_2A_3	-	1	***	tr|Q9XEI0|Q9XEI0_STERE	Kaurene synthase	PF01397: Terpene synthase, N-terminal domain; PF03936: Terpene synthase family, metal binding domain	IPR001906: Terpene synthase, N-terminal domain; IPR005630: Terpene synthase, metal-binding domain; IPR008930: Terpenoid cyclases/protein prenyltransferase alpha-alpha toroid; IPR008949: Isoprenoid synthase domain	GO:0000287 MF: magnesium ion binding;GO:0008152 BP: metabolic process;GO:0010333 MF: terpene synthase activity;GO:0016829 MF: lyase activity	G
HC	2A	674028807	681028807	QTL_2A_3	+	1	***	tr|Q9AVQ2|Q9AVQ2_SOLTU	Cytochrome P450	PF00067: Cytochrome P450	IPR001128: Cytochrome P450; IPR002401: Cytochrome P450, E-class, group I; IPR017972: Cytochrome P450, conserved site	GO:0005506 MF: iron ion binding;GO:0016705 MF: oxidoreductase activity, acting on paired donors, with incorporation or reduction of molecular oxygen;GO:0020037 MF: heme binding;GO:0055114 BP: oxidation-reduction process	G
HC	2A	674028807	681028807	QTL_2A_3	+	1	***	tr|Q9AVQ2|Q9AVQ2_SOLTU	Cytochrome P450	PF00067: Cytochrome P450	IPR001128: Cytochrome P450; IPR002401: Cytochrome P450, E-class, group I; IPR017972: Cytochrome P450, conserved site	GO:0005506 MF: iron ion binding;GO:0016705 MF: oxidoreductase activity, acting on paired donors, with incorporation or reduction of molecular oxygen;GO:0020037 MF: heme binding;GO:0055114 BP: oxidation-reduction process	G
HC	2A	674028807	681028807	QTL_2A_3	+	1	***	tr|Q9AVQ2|Q9AVQ2_SOLTU	Cytochrome P450	PF00067: Cytochrome P450	IPR001128: Cytochrome P450; IPR002401: Cytochrome P450, E-class, group I; IPR017972: Cytochrome P450, conserved site	GO:0005506 MF: iron ion binding;GO:0016705 MF: oxidoreductase activity, acting on paired donors, with incorporation or reduction of molecular oxygen;GO:0020037 MF: heme binding;GO:0055114 BP: oxidation-reduction process	G
HC	2A	674028807	681028807	QTL_2A_3	+	1	***	tr|Q9AVQ2|Q9AVQ2_SOLTU	Cytochrome P450	PF00067: Cytochrome P450	IPR001128: Cytochrome P450; IPR002401: Cytochrome P450, E-class, group I; IPR017972: Cytochrome P450, conserved site	GO:0005506 MF: iron ion binding;GO:0016705 MF: oxidoreductase activity, acting on paired donors, with incorporation or reduction of molecular oxygen;GO:0020037 MF: heme binding;GO:0055114 BP: oxidation-reduction process	G
LC	2A	674028807	681028807	QTL_2A_3	+	1	--*	sp|B5DS72|MOC31_DROPS	Adenylyltransferase and sulfurtransferase MOCS3-1				G
LC	2A	674028807	681028807	QTL_2A_3	+	1	--*	tr|A0A0B2R0Q2|A0A0B2R0Q2_GLYSO	LINE-1 reverse transcriptase like	PF13966: zinc-binding in reverse transcriptase	IPR026960: Reverse transcriptase zinc-binding domain		TE
HC	2A	674028807	681028807	QTL_2A_3	-	1	--*	AT2G31170.3	Cysteinyl-tRNA synthetase, class Ia family protein				G
LC	2A	674028807	681028807	QTL_2A_3	+	1	--*	AT3G52340.7	sucrose-6F-phosphate phosphohydrolase 2				G
LC	2A	674028807	681028807	QTL_2A_3	+	1	--*	AT1G06650.1	2-oxoglutarate (2OG) and Fe(II)-dependent oxygenase superfamily protein				G
LC	2A	674028807	681028807	QTL_2A_3	+	1	--*	sp|Q0AIY2|GRPE_NITEC	Protein GrpE				G
HC	2A	674028807	681028807	QTL_2A_3	-	0	***	tr|G8AD54|G8AD54_WHEAT	Ent-kaurene synthase	PF01397: Terpene synthase, N-terminal domain; PF03936: Terpene synthase family, metal binding domain	IPR001906: Terpene synthase, N-terminal domain; IPR005630: Terpene synthase, metal-binding domain; IPR008930: Terpenoid cyclases/protein prenyltransferase alpha-alpha toroid; IPR008949: Isoprenoid synthase domain	GO:0000287 MF: magnesium ion binding;GO:0008152 BP: metabolic process;GO:0010333 MF: terpene synthase activity;GO:0016829 MF: lyase activity	G
HC	2A	674028807	681028807	QTL_2A_3	-	0	***	tr|G8AD54|G8AD54_WHEAT	Ent-kaurene synthase	PF01397: Terpene synthase, N-terminal domain; PF03936: Terpene synthase family, metal binding domain	IPR001906: Terpene synthase, N-terminal domain; IPR005630: Terpene synthase, metal-binding domain; IPR008930: Terpenoid cyclases/protein prenyltransferase alpha-alpha toroid; IPR008949: Isoprenoid synthase domain	GO:0000287 MF: magnesium ion binding;GO:0008152 BP: metabolic process;GO:0010333 MF: terpene synthase activity;GO:0016829 MF: lyase activity	G
HC	2A	674028807	681028807	QTL_2A_3	-	0	***	tr|G8AD54|G8AD54_WHEAT	Ent-kaurene synthase	PF01397: Terpene synthase, N-terminal domain; PF03936: Terpene synthase family, metal binding domain	IPR001906: Terpene synthase, N-terminal domain; IPR005630: Terpene synthase, metal-binding domain; IPR008930: Terpenoid cyclases/protein prenyltransferase alpha-alpha toroid; IPR008949: Isoprenoid synthase domain	GO:0000287 MF: magnesium ion binding;GO:0008152 BP: metabolic process;GO:0010333 MF: terpene synthase activity;GO:0016829 MF: lyase activity	G
HC	2A	674028807	681028807	QTL_2A_3	-	0	***	tr|G8AD54|G8AD54_WHEAT	Ent-kaurene synthase	PF01397: Terpene synthase, N-terminal domain; PF03936: Terpene synthase family, metal binding domain	IPR001906: Terpene synthase, N-terminal domain; IPR005630: Terpene synthase, metal-binding domain; IPR008930: Terpenoid cyclases/protein prenyltransferase alpha-alpha toroid; IPR008949: Isoprenoid synthase domain	GO:0000287 MF: magnesium ion binding;GO:0008152 BP: metabolic process;GO:0010333 MF: terpene synthase activity;GO:0016829 MF: lyase activity	G
HC	2A	674028807	681028807	QTL_2A_3	-	0	***	tr|G8AD54|G8AD54_WHEAT	Ent-kaurene synthase	PF01397: Terpene synthase, N-terminal domain; PF03936: Terpene synthase family, metal binding domain	IPR001906: Terpene synthase, N-terminal domain; IPR005630: Terpene synthase, metal-binding domain; IPR008930: Terpenoid cyclases/protein prenyltransferase alpha-alpha toroid; IPR008949: Isoprenoid synthase domain	GO:0000287 MF: magnesium ion binding;GO:0008152 BP: metabolic process;GO:0010333 MF: terpene synthase activity;GO:0016829 MF: lyase activity	G
HC	2A	674028807	681028807	QTL_2A_3	-	0	***	tr|G8AD54|G8AD54_WHEAT	Ent-kaurene synthase	PF01397: Terpene synthase, N-terminal domain; PF03936: Terpene synthase family, metal binding domain	IPR001906: Terpene synthase, N-terminal domain; IPR005630: Terpene synthase, metal-binding domain; IPR008930: Terpenoid cyclases/protein prenyltransferase alpha-alpha toroid; IPR008949: Isoprenoid synthase domain	GO:0000287 MF: magnesium ion binding;GO:0008152 BP: metabolic process;GO:0010333 MF: terpene synthase activity;GO:0016829 MF: lyase activity	G
HC	2A	674028807	681028807	QTL_2A_3	-	0	***	tr|G8AD54|G8AD54_WHEAT	Ent-kaurene synthase	PF01397: Terpene synthase, N-terminal domain; PF03936: Terpene synthase family, metal binding domain	IPR001906: Terpene synthase, N-terminal domain; IPR005630: Terpene synthase, metal-binding domain; IPR008930: Terpenoid cyclases/protein prenyltransferase alpha-alpha toroid; IPR008949: Isoprenoid synthase domain	GO:0000287 MF: magnesium ion binding;GO:0008152 BP: metabolic process;GO:0010333 MF: terpene synthase activity;GO:0016829 MF: lyase activity	G
HC	2A	674028807	681028807	QTL_2A_3	-	0	***	tr|G8AD54|G8AD54_WHEAT	Ent-kaurene synthase	PF01397: Terpene synthase, N-terminal domain; PF03936: Terpene synthase family, metal binding domain	IPR001906: Terpene synthase, N-terminal domain; IPR005630: Terpene synthase, metal-binding domain; IPR008930: Terpenoid cyclases/protein prenyltransferase alpha-alpha toroid; IPR008949: Isoprenoid synthase domain	GO:0000287 MF: magnesium ion binding;GO:0008152 BP: metabolic process;GO:0010333 MF: terpene synthase activity;GO:0016829 MF: lyase activity	G
HC	2A	674028807	681028807	QTL_2A_3	-	1	***	tr|G8AD54|G8AD54_WHEAT	Ent-kaurene synthase	PF01397: Terpene synthase, N-terminal domain; PF03936: Terpene synthase family, metal binding domain	IPR001906: Terpene synthase, N-terminal domain; IPR005630: Terpene synthase, metal-binding domain; IPR008930: Terpenoid cyclases/protein prenyltransferase alpha-alpha toroid; IPR008949: Isoprenoid synthase domain	GO:0000287 MF: magnesium ion binding;GO:0008152 BP: metabolic process;GO:0010333 MF: terpene synthase activity;GO:0016829 MF: lyase activity	G
HC	2A	674028807	681028807	QTL_2A_3	-	1	***	tr|G8AD54|G8AD54_WHEAT	Ent-kaurene synthase	PF01397: Terpene synthase, N-terminal domain; PF03936: Terpene synthase family, metal binding domain	IPR001906: Terpene synthase, N-terminal domain; IPR005630: Terpene synthase, metal-binding domain; IPR008930: Terpenoid cyclases/protein prenyltransferase alpha-alpha toroid; IPR008949: Isoprenoid synthase domain	GO:0000287 MF: magnesium ion binding;GO:0008152 BP: metabolic process;GO:0010333 MF: terpene synthase activity;GO:0016829 MF: lyase activity	G
HC	2A	674028807	681028807	QTL_2A_3	-	1	***	tr|G8AD54|G8AD54_WHEAT	Ent-kaurene synthase	PF01397: Terpene synthase, N-terminal domain; PF03936: Terpene synthase family, metal binding domain	IPR001906: Terpene synthase, N-terminal domain; IPR005630: Terpene synthase, metal-binding domain; IPR008930: Terpenoid cyclases/protein prenyltransferase alpha-alpha toroid; IPR008949: Isoprenoid synthase domain	GO:0000287 MF: magnesium ion binding;GO:0008152 BP: metabolic process;GO:0010333 MF: terpene synthase activity;GO:0016829 MF: lyase activity	G
HC	2A	674028807	681028807	QTL_2A_3	-	1	***	tr|G8AD54|G8AD54_WHEAT	Ent-kaurene synthase	PF01397: Terpene synthase, N-terminal domain; PF03936: Terpene synthase family, metal binding domain	IPR001906: Terpene synthase, N-terminal domain; IPR005630: Terpene synthase, metal-binding domain; IPR008930: Terpenoid cyclases/protein prenyltransferase alpha-alpha toroid; IPR008949: Isoprenoid synthase domain	GO:0000287 MF: magnesium ion binding;GO:0008152 BP: metabolic process;GO:0010333 MF: terpene synthase activity;GO:0016829 MF: lyase activity	G
HC	2A	674028807	681028807	QTL_2A_3	-	0	***	tr|G8AD54|G8AD54_WHEAT	Ent-kaurene synthase	PF01397: Terpene synthase, N-terminal domain; PF03936: Terpene synthase family, metal binding domain	IPR001906: Terpene synthase, N-terminal domain; IPR005630: Terpene synthase, metal-binding domain; IPR008930: Terpenoid cyclases/protein prenyltransferase alpha-alpha toroid; IPR008949: Isoprenoid synthase domain	GO:0000287 MF: magnesium ion binding;GO:0008152 BP: metabolic process;GO:0010333 MF: terpene synthase activity;GO:0016829 MF: lyase activity	G
HC	2A	674028807	681028807	QTL_2A_3	-	0	***	tr|G8AD54|G8AD54_WHEAT	Ent-kaurene synthase	PF01397: Terpene synthase, N-terminal domain; PF03936: Terpene synthase family, metal binding domain	IPR001906: Terpene synthase, N-terminal domain; IPR005630: Terpene synthase, metal-binding domain; IPR008930: Terpenoid cyclases/protein prenyltransferase alpha-alpha toroid; IPR008949: Isoprenoid synthase domain	GO:0000287 MF: magnesium ion binding;GO:0008152 BP: metabolic process;GO:0010333 MF: terpene synthase activity;GO:0016829 MF: lyase activity	G
HC	2A	674028807	681028807	QTL_2A_3	-	0	***	tr|G8AD54|G8AD54_WHEAT	Ent-kaurene synthase	PF01397: Terpene synthase, N-terminal domain; PF03936: Terpene synthase family, metal binding domain	IPR001906: Terpene synthase, N-terminal domain; IPR005630: Terpene synthase, metal-binding domain; IPR008930: Terpenoid cyclases/protein prenyltransferase alpha-alpha toroid; IPR008949: Isoprenoid synthase domain	GO:0000287 MF: magnesium ion binding;GO:0008152 BP: metabolic process;GO:0010333 MF: terpene synthase activity;GO:0016829 MF: lyase activity	G
HC	2A	674028807	681028807	QTL_2A_3	-	0	***	tr|G8AD54|G8AD54_WHEAT	Ent-kaurene synthase	PF01397: Terpene synthase, N-terminal domain; PF03936: Terpene synthase family, metal binding domain	IPR001906: Terpene synthase, N-terminal domain; IPR005630: Terpene synthase, metal-binding domain; IPR008930: Terpenoid cyclases/protein prenyltransferase alpha-alpha toroid; IPR008949: Isoprenoid synthase domain	GO:0000287 MF: magnesium ion binding;GO:0008152 BP: metabolic process;GO:0010333 MF: terpene synthase activity;GO:0016829 MF: lyase activity	G
HC	2A	674028807	681028807	QTL_2A_3	-	0	***	tr|G8AD54|G8AD54_WHEAT	Ent-kaurene synthase	PF01397: Terpene synthase, N-terminal domain; PF03936: Terpene synthase family, metal binding domain	IPR001906: Terpene synthase, N-terminal domain; IPR005630: Terpene synthase, metal-binding domain; IPR008930: Terpenoid cyclases/protein prenyltransferase alpha-alpha toroid; IPR008949: Isoprenoid synthase domain	GO:0000287 MF: magnesium ion binding;GO:0008152 BP: metabolic process;GO:0010333 MF: terpene synthase activity;GO:0016829 MF: lyase activity	G
HC	2A	674028807	681028807	QTL_2A_3	-	0	***	tr|G8AD54|G8AD54_WHEAT	Ent-kaurene synthase	PF01397: Terpene synthase, N-terminal domain; PF03936: Terpene synthase family, metal binding domain	IPR001906: Terpene synthase, N-terminal domain; IPR005630: Terpene synthase, metal-binding domain; IPR008930: Terpenoid cyclases/protein prenyltransferase alpha-alpha toroid; IPR008949: Isoprenoid synthase domain	GO:0000287 MF: magnesium ion binding;GO:0008152 BP: metabolic process;GO:0010333 MF: terpene synthase activity;GO:0016829 MF: lyase activity	G
HC	2A	674028807	681028807	QTL_2A_3	-	0	***	tr|G8AD54|G8AD54_WHEAT	Ent-kaurene synthase	PF01397: Terpene synthase, N-terminal domain; PF03936: Terpene synthase family, metal binding domain	IPR001906: Terpene synthase, N-terminal domain; IPR005630: Terpene synthase, metal-binding domain; IPR008930: Terpenoid cyclases/protein prenyltransferase alpha-alpha toroid; IPR008949: Isoprenoid synthase domain	GO:0000287 MF: magnesium ion binding;GO:0008152 BP: metabolic process;GO:0010333 MF: terpene synthase activity;GO:0016829 MF: lyase activity	G
HC	2A	674028807	681028807	QTL_2A_3	-	0	***	tr|G8AD54|G8AD54_WHEAT	Ent-kaurene synthase	PF01397: Terpene synthase, N-terminal domain; PF03936: Terpene synthase family, metal binding domain	IPR001906: Terpene synthase, N-terminal domain; IPR005630: Terpene synthase, metal-binding domain; IPR008930: Terpenoid cyclases/protein prenyltransferase alpha-alpha toroid; IPR008949: Isoprenoid synthase domain	GO:0000287 MF: magnesium ion binding;GO:0008152 BP: metabolic process;GO:0010333 MF: terpene synthase activity;GO:0016829 MF: lyase activity	G
HC	2A	674028807	681028807	QTL_2A_3	-	0	***	tr|D4IIJ1|D4IIJ1_HELAN	Kaurene synthase	PF01397: Terpene synthase, N-terminal domain; PF03936: Terpene synthase family, metal binding domain	IPR001906: Terpene synthase, N-terminal domain; IPR005630: Terpene synthase, metal-binding domain; IPR008930: Terpenoid cyclases/protein prenyltransferase alpha-alpha toroid; IPR008949: Isoprenoid synthase domain	GO:0000287 MF: magnesium ion binding;GO:0008152 BP: metabolic process;GO:0010333 MF: terpene synthase activity;GO:0016829 MF: lyase activity	G
HC	2A	674028807	681028807	QTL_2A_3	-	0	***	tr|D4IIJ1|D4IIJ1_HELAN	Kaurene synthase	PF01397: Terpene synthase, N-terminal domain; PF03936: Terpene synthase family, metal binding domain	IPR001906: Terpene synthase, N-terminal domain; IPR005630: Terpene synthase, metal-binding domain; IPR008930: Terpenoid cyclases/protein prenyltransferase alpha-alpha toroid; IPR008949: Isoprenoid synthase domain	GO:0000287 MF: magnesium ion binding;GO:0008152 BP: metabolic process;GO:0010333 MF: terpene synthase activity;GO:0016829 MF: lyase activity	G
HC	2A	674028807	681028807	QTL_2A_3	-	0	***	tr|D4IIJ1|D4IIJ1_HELAN	Kaurene synthase	PF01397: Terpene synthase, N-terminal domain; PF03936: Terpene synthase family, metal binding domain	IPR001906: Terpene synthase, N-terminal domain; IPR005630: Terpene synthase, metal-binding domain; IPR008930: Terpenoid cyclases/protein prenyltransferase alpha-alpha toroid; IPR008949: Isoprenoid synthase domain	GO:0000287 MF: magnesium ion binding;GO:0008152 BP: metabolic process;GO:0010333 MF: terpene synthase activity;GO:0016829 MF: lyase activity	G
HC	2A	674028807	681028807	QTL_2A_3	-	0	***	tr|D4IIJ1|D4IIJ1_HELAN	Kaurene synthase	PF01397: Terpene synthase, N-terminal domain; PF03936: Terpene synthase family, metal binding domain	IPR001906: Terpene synthase, N-terminal domain; IPR005630: Terpene synthase, metal-binding domain; IPR008930: Terpenoid cyclases/protein prenyltransferase alpha-alpha toroid; IPR008949: Isoprenoid synthase domain	GO:0000287 MF: magnesium ion binding;GO:0008152 BP: metabolic process;GO:0010333 MF: terpene synthase activity;GO:0016829 MF: lyase activity	G
HC	2A	674028807	681028807	QTL_2A_3	-	1	***	tr|D4IIJ1|D4IIJ1_HELAN	Kaurene synthase	PF01397: Terpene synthase, N-terminal domain; PF03936: Terpene synthase family, metal binding domain	IPR001906: Terpene synthase, N-terminal domain; IPR005630: Terpene synthase, metal-binding domain; IPR008930: Terpenoid cyclases/protein prenyltransferase alpha-alpha toroid; IPR008949: Isoprenoid synthase domain	GO:0000287 MF: magnesium ion binding;GO:0008152 BP: metabolic process;GO:0010333 MF: terpene synthase activity;GO:0016829 MF: lyase activity	G
HC	2A	674028807	681028807	QTL_2A_3	-	1	***	tr|D4IIJ1|D4IIJ1_HELAN	Kaurene synthase	PF01397: Terpene synthase, N-terminal domain; PF03936: Terpene synthase family, metal binding domain	IPR001906: Terpene synthase, N-terminal domain; IPR005630: Terpene synthase, metal-binding domain; IPR008930: Terpenoid cyclases/protein prenyltransferase alpha-alpha toroid; IPR008949: Isoprenoid synthase domain	GO:0000287 MF: magnesium ion binding;GO:0008152 BP: metabolic process;GO:0010333 MF: terpene synthase activity;GO:0016829 MF: lyase activity	G
HC	2A	674028807	681028807	QTL_2A_3	-	1	***	tr|D4IIJ1|D4IIJ1_HELAN	Kaurene synthase	PF01397: Terpene synthase, N-terminal domain; PF03936: Terpene synthase family, metal binding domain	IPR001906: Terpene synthase, N-terminal domain; IPR005630: Terpene synthase, metal-binding domain; IPR008930: Terpenoid cyclases/protein prenyltransferase alpha-alpha toroid; IPR008949: Isoprenoid synthase domain	GO:0000287 MF: magnesium ion binding;GO:0008152 BP: metabolic process;GO:0010333 MF: terpene synthase activity;GO:0016829 MF: lyase activity	G
HC	2A	674028807	681028807	QTL_2A_3	-	1	***	tr|D4IIJ1|D4IIJ1_HELAN	Kaurene synthase	PF01397: Terpene synthase, N-terminal domain; PF03936: Terpene synthase family, metal binding domain	IPR001906: Terpene synthase, N-terminal domain; IPR005630: Terpene synthase, metal-binding domain; IPR008930: Terpenoid cyclases/protein prenyltransferase alpha-alpha toroid; IPR008949: Isoprenoid synthase domain	GO:0000287 MF: magnesium ion binding;GO:0008152 BP: metabolic process;GO:0010333 MF: terpene synthase activity;GO:0016829 MF: lyase activity	G
HC	2A	674028807	681028807	QTL_2A_3	-	1	***	tr|D4IIJ1|D4IIJ1_HELAN	Kaurene synthase	PF01397: Terpene synthase, N-terminal domain; PF03936: Terpene synthase family, metal binding domain	IPR001906: Terpene synthase, N-terminal domain; IPR005630: Terpene synthase, metal-binding domain; IPR008930: Terpenoid cyclases/protein prenyltransferase alpha-alpha toroid; IPR008949: Isoprenoid synthase domain	GO:0000287 MF: magnesium ion binding;GO:0008152 BP: metabolic process;GO:0010333 MF: terpene synthase activity;GO:0016829 MF: lyase activity	G
HC	2A	674028807	681028807	QTL_2A_3	-	1	***	tr|D4IIJ1|D4IIJ1_HELAN	Kaurene synthase	PF01397: Terpene synthase, N-terminal domain; PF03936: Terpene synthase family, metal binding domain	IPR001906: Terpene synthase, N-terminal domain; IPR005630: Terpene synthase, metal-binding domain; IPR008930: Terpenoid cyclases/protein prenyltransferase alpha-alpha toroid; IPR008949: Isoprenoid synthase domain	GO:0000287 MF: magnesium ion binding;GO:0008152 BP: metabolic process;GO:0010333 MF: terpene synthase activity;GO:0016829 MF: lyase activity	G
HC	2A	674028807	681028807	QTL_2A_3	-	1	***	tr|D4IIJ1|D4IIJ1_HELAN	Kaurene synthase	PF01397: Terpene synthase, N-terminal domain; PF03936: Terpene synthase family, metal binding domain	IPR001906: Terpene synthase, N-terminal domain; IPR005630: Terpene synthase, metal-binding domain; IPR008930: Terpenoid cyclases/protein prenyltransferase alpha-alpha toroid; IPR008949: Isoprenoid synthase domain	GO:0000287 MF: magnesium ion binding;GO:0008152 BP: metabolic process;GO:0010333 MF: terpene synthase activity;GO:0016829 MF: lyase activity	G
HC	2A	674028807	681028807	QTL_2A_3	-	1	***	tr|D4IIJ1|D4IIJ1_HELAN	Kaurene synthase	PF01397: Terpene synthase, N-terminal domain; PF03936: Terpene synthase family, metal binding domain	IPR001906: Terpene synthase, N-terminal domain; IPR005630: Terpene synthase, metal-binding domain; IPR008930: Terpenoid cyclases/protein prenyltransferase alpha-alpha toroid; IPR008949: Isoprenoid synthase domain	GO:0000287 MF: magnesium ion binding;GO:0008152 BP: metabolic process;GO:0010333 MF: terpene synthase activity;GO:0016829 MF: lyase activity	G
HC	2A	674028807	681028807	QTL_2A_3	+	1	***	tr|A0A0K9P1B7|A0A0K9P1B7_ZOSMR	RNA binding protein	PF00076: RNA recognition motif. (a.k.a. RRM, RBD, or RNP domain)	IPR000504: RNA recognition motif domain; IPR003954: RNA recognition motif domain, eukaryote	GO:0003676 MF: nucleic acid binding	G
HC	2A	674028807	681028807	QTL_2A_3	+	0	***	tr|A0A0K9P1B7|A0A0K9P1B7_ZOSMR	RNA binding protein	PF00076: RNA recognition motif. (a.k.a. RRM, RBD, or RNP domain)	IPR000504: RNA recognition motif domain; IPR003954: RNA recognition motif domain, eukaryote	GO:0003676 MF: nucleic acid binding	G
HC	2A	674028807	681028807	QTL_2A_3	-	0	***	tr|B9GYG5|B9GYG5_POPTR	Vacuolar sorting receptor family protein		IPR018097: EGF-like calcium-binding, conserved site	GO:0005509 MF: calcium ion binding	G
HC	2A	674028807	681028807	QTL_2A_3	-	1	***	tr|B9GYG5|B9GYG5_POPTR	Vacuolar sorting receptor family protein	PF02225: PA domain	IPR003137: PA domain; IPR018097: EGF-like calcium-binding, conserved site	GO:0005509 MF: calcium ion binding	G
LC	2A	674028807	681028807	QTL_2A_3	+	1	--*	sp|A0ALV1|RS5_LISW6	30S ribosomal protein S5				G
HC	2A	674028807	681028807	QTL_2A_3	-	1	--*	AT4G11820.3	hydroxymethylglutaryl-CoA synthase / HMG-CoA synthase / 3-hydroxy-3-methylglutaryl coenzyme A synthase				G
LC	2A	674028807	681028807	QTL_2A_3	+	1	--*	sp|B4UGW9|PURA_ANASK	Adenylosuccinate synthetase				G
LC	2A	674028807	681028807	QTL_2A_3	-	1	***	tr|B9RY28|B9RY28_RICCO	Cationic amino acid transporter, putative	PF13520: Amino acid permease; PF13906: C-terminus of AA_permease	IPR002293: Amino acid/polyamine transporter I; IPR029485: Cationic amino acid transporter, C-terminal	GO:0003333 BP: amino acid transmembrane transport;GO:0015171 MF: amino acid transmembrane transporter activity;GO:0016020 CC: membrane	G
LC	2A	674028807	681028807	QTL_2A_3	-	1	***	tr|B9RY28|B9RY28_RICCO	Cationic amino acid transporter, putative	PF13520: Amino acid permease; PF13906: C-terminus of AA_permease	IPR002293: Amino acid/polyamine transporter I; IPR029485: Cationic amino acid transporter, C-terminal	GO:0003333 BP: amino acid transmembrane transport;GO:0015171 MF: amino acid transmembrane transporter activity;GO:0016020 CC: membrane	G
LC	2A	674028807	681028807	QTL_2A_3	-	1	***	tr|B9RY28|B9RY28_RICCO	Cationic amino acid transporter, putative	PF13520: Amino acid permease; PF13906: C-terminus of AA_permease	IPR002293: Amino acid/polyamine transporter I; IPR029485: Cationic amino acid transporter, C-terminal	GO:0003333 BP: amino acid transmembrane transport;GO:0015171 MF: amino acid transmembrane transporter activity;GO:0016020 CC: membrane	G
LC	2A	674028807	681028807	QTL_2A_3	-	1	--*	sp|Q9DGT6|ICP4_GAHVM	Major viral transcription factor ICP4 homolog				G
HC	2A	674028807	681028807	QTL_2A_3	-	1	***	tr|A0A061FEX2|A0A061FEX2_THECC	HXXXD-type acyl-transferase family protein, putative	PF02458: Transferase family	IPR003480: Transferase	GO:0016747 MF: transferase activity, transferring acyl groups other than amino-acyl groups	G
LC	2A	674028807	681028807	QTL_2A_3	-	1	*-*	tr|A2Q338|A2Q338_MEDTR	RNA-directed DNA polymerase (Reverse transcriptase)				TE
LC	2A	674028807	681028807	QTL_2A_3	+	1	-**	AT2G13980.1	Polynucleotidyl transferase, ribonuclease H-like superfamily protein	PF13456: Reverse transcriptase-like	IPR012337: Ribonuclease H-like domain	GO:0003676 MF: nucleic acid binding	TE
HC	2A	674028807	681028807	QTL_2A_3	+	1	***	tr|A9PI71|A9PI71_POPTR	26S proteasome non-ATPase regulatory subunit family protein	PF10075: CSN8/PSMD8/EIF3K family	IPR033464: CSN8/PSMD8/EIF3K		G
HC	2A	674028807	681028807	QTL_2A_3	-	0	***	tr|F4JQX7|F4JQX7_ARATH	Protein kinase family protein	PF14381: Ethylene-responsive protein kinase Le-CTR1; PF07714: Protein tyrosine kinase	IPR000719: Protein kinase domain; IPR001245: Serine-threonine/tyrosine-protein kinase, catalytic domain; IPR008271: Serine/threonine-protein kinase, active site; IPR011009: Protein kinase-like domain; IPR017441: Protein kinase, ATP binding site	GO:0004672 MF: protein kinase activity;GO:0005524 MF: ATP binding;GO:0006468 BP: protein phosphorylation	G
HC	2A	674028807	681028807	QTL_2A_3	-	0	***	tr|F4JQX7|F4JQX7_ARATH	Protein kinase family protein	PF14381: Ethylene-responsive protein kinase Le-CTR1; PF07714: Protein tyrosine kinase	IPR000719: Protein kinase domain; IPR001245: Serine-threonine/tyrosine-protein kinase, catalytic domain; IPR008271: Serine/threonine-protein kinase, active site; IPR011009: Protein kinase-like domain; IPR017441: Protein kinase, ATP binding site	GO:0004672 MF: protein kinase activity;GO:0005524 MF: ATP binding;GO:0006468 BP: protein phosphorylation	G
HC	2A	674028807	681028807	QTL_2A_3	-	0	***	tr|F4JQX7|F4JQX7_ARATH	Protein kinase family protein	PF14381: Ethylene-responsive protein kinase Le-CTR1; PF07714: Protein tyrosine kinase	IPR000719: Protein kinase domain; IPR001245: Serine-threonine/tyrosine-protein kinase, catalytic domain; IPR008271: Serine/threonine-protein kinase, active site; IPR011009: Protein kinase-like domain; IPR017441: Protein kinase, ATP binding site	GO:0004672 MF: protein kinase activity;GO:0005524 MF: ATP binding;GO:0006468 BP: protein phosphorylation	G
HC	2A	674028807	681028807	QTL_2A_3	-	0	***	tr|F4JQX7|F4JQX7_ARATH	Protein kinase family protein	PF14381: Ethylene-responsive protein kinase Le-CTR1; PF07714: Protein tyrosine kinase	IPR000719: Protein kinase domain; IPR001245: Serine-threonine/tyrosine-protein kinase, catalytic domain; IPR008271: Serine/threonine-protein kinase, active site; IPR011009: Protein kinase-like domain; IPR017441: Protein kinase, ATP binding site	GO:0004672 MF: protein kinase activity;GO:0005524 MF: ATP binding;GO:0006468 BP: protein phosphorylation	G
HC	2A	674028807	681028807	QTL_2A_3	-	0	***	tr|F4JQX7|F4JQX7_ARATH	Protein kinase family protein	PF14381: Ethylene-responsive protein kinase Le-CTR1; PF07714: Protein tyrosine kinase	IPR000719: Protein kinase domain; IPR001245: Serine-threonine/tyrosine-protein kinase, catalytic domain; IPR008271: Serine/threonine-protein kinase, active site; IPR011009: Protein kinase-like domain; IPR017441: Protein kinase, ATP binding site	GO:0004672 MF: protein kinase activity;GO:0005524 MF: ATP binding;GO:0006468 BP: protein phosphorylation	G
HC	2A	674028807	681028807	QTL_2A_3	-	0	***	tr|F4JQX7|F4JQX7_ARATH	Protein kinase family protein	PF14381: Ethylene-responsive protein kinase Le-CTR1; PF07714: Protein tyrosine kinase	IPR000719: Protein kinase domain; IPR001245: Serine-threonine/tyrosine-protein kinase, catalytic domain; IPR008271: Serine/threonine-protein kinase, active site; IPR011009: Protein kinase-like domain; IPR017441: Protein kinase, ATP binding site	GO:0004672 MF: protein kinase activity;GO:0005524 MF: ATP binding;GO:0006468 BP: protein phosphorylation	G
HC	2A	674028807	681028807	QTL_2A_3	-	1	***	tr|F4JQX7|F4JQX7_ARATH	Protein kinase family protein	PF14381: Ethylene-responsive protein kinase Le-CTR1; PF07714: Protein tyrosine kinase	IPR000719: Protein kinase domain; IPR001245: Serine-threonine/tyrosine-protein kinase, catalytic domain; IPR008271: Serine/threonine-protein kinase, active site; IPR011009: Protein kinase-like domain; IPR017441: Protein kinase, ATP binding site	GO:0004672 MF: protein kinase activity;GO:0005524 MF: ATP binding;GO:0006468 BP: protein phosphorylation	G
HC	2A	674028807	681028807	QTL_2A_3	-	1	***	tr|F4JQX7|F4JQX7_ARATH	Protein kinase family protein	PF14381: Ethylene-responsive protein kinase Le-CTR1; PF07714: Protein tyrosine kinase	IPR000719: Protein kinase domain; IPR001245: Serine-threonine/tyrosine-protein kinase, catalytic domain; IPR008271: Serine/threonine-protein kinase, active site; IPR011009: Protein kinase-like domain; IPR017441: Protein kinase, ATP binding site	GO:0004672 MF: protein kinase activity;GO:0005524 MF: ATP binding;GO:0006468 BP: protein phosphorylation	G
HC	2A	674028807	681028807	QTL_2A_3	-	1	***	tr|F4JQX7|F4JQX7_ARATH	Protein kinase family protein	PF14381: Ethylene-responsive protein kinase Le-CTR1; PF07714: Protein tyrosine kinase	IPR000719: Protein kinase domain; IPR001245: Serine-threonine/tyrosine-protein kinase, catalytic domain; IPR008271: Serine/threonine-protein kinase, active site; IPR011009: Protein kinase-like domain; IPR017441: Protein kinase, ATP binding site	GO:0004672 MF: protein kinase activity;GO:0005524 MF: ATP binding;GO:0006468 BP: protein phosphorylation	G
LC	2A	674028807	681028807	QTL_2A_3	+	1	--*	AT2G34320.1	Polynucleotidyl transferase, ribonuclease H-like superfamily protein	PF13456: Reverse transcriptase-like	IPR012337: Ribonuclease H-like domain	GO:0003676 MF: nucleic acid binding	TE
LC	2A	674028807	681028807	QTL_2A_3	+	1	*-*	AT3G58980.1	F-box family protein	PF00646: F-box domain	IPR001810: F-box domain; IPR032675: Leucine-rich repeat domain, L domain-like	GO:0005515 MF: protein binding	TE?
HC	2A	674028807	681028807	QTL_2A_3	+	1	***	AT5G22540.1	transmembrane protein, putative (DUF247)	PF03140: Plant protein of unknown function	IPR004158: Protein of unknown function DUF247, plant		G
LC	2A	674028807	681028807	QTL_2A_3	+	1	***	AT3G50180.1	transmembrane protein, putative (DUF247)	PF03140: Plant protein of unknown function	IPR004158: Protein of unknown function DUF247, plant		G
HC	2A	674028807	681028807	QTL_2A_3	+	1	***	AT3G50180.1	transmembrane protein, putative (DUF247)	PF03140: Plant protein of unknown function	IPR004158: Protein of unknown function DUF247, plant		G
HC	2A	674028807	681028807	QTL_2A_3	-	1	***	tr|A0A1D5T6B7|A0A1D5T6B7_WHEAT	Sulfotransferase	PF00685: Sulfotransferase domain	IPR000863: Sulfotransferase domain; IPR027417: P-loop containing nucleoside triphosphate hydrolase	GO:0008146 MF: sulfotransferase activity	G
LC	2A	674028807	681028807	QTL_2A_3	-	1	*-*	AT3G50180.1	transmembrane protein, putative (DUF247)	PF03140: Plant protein of unknown function	IPR004158: Protein of unknown function DUF247, plant		G
HC	2A	674028807	681028807	QTL_2A_3	-	1	***	AT3G48660.1	transmembrane protein, putative (DUF 3339)	PF11820: Protein of unknown function (DUF3339)	IPR021775: Protein of unknown function DUF3339		G
LC	2A	674028807	681028807	QTL_2A_3	+	1	--*	AT2G33385.4	actin-related protein C2B				G
HC	2A	674028807	681028807	QTL_2A_3	-	1	***	AT3G48660.1	transmembrane protein, putative (DUF 3339)	PF11820: Protein of unknown function (DUF3339)	IPR021775: Protein of unknown function DUF3339		G
HC	2A	674028807	681028807	QTL_2A_3	-	1	*-*	AT3G25270.1	Ribonuclease H-like superfamily protein				TE
LC	2A	674028807	681028807	QTL_2A_3	-	1	*-*	tr|A0A199V9F3|A0A199V9F3_ANACO	LINE-1 reverse transcriptase	PF00078: Reverse transcriptase (RNA-dependent DNA polymerase)	IPR000477: Reverse transcriptase domain		TE
LC	2A	674028807	681028807	QTL_2A_3	-	1	*-*	tr|Q2QZV1|Q2QZV1_ORYSJ	Retrotransposon protein, putative, unclassified		IPR005135: Endonuclease/exonuclease/phosphatase		TE
HC	2A	674028807	681028807	QTL_2A_3	-	1	***	sp|Q9V3D2|HEM6_DROME	Oxygen-dependent coproporphyrinogen-III oxidase	PF01218: Coproporphyrinogen III oxidase	IPR001260: Coproporphyrinogen III oxidase, aerobic; IPR018375: Coproporphyrinogen III oxidase, conserved site	GO:0004109 MF: coproporphyrinogen oxidase activity;GO:0006779 BP: porphyrin-containing compound biosynthetic process;GO:0055114 BP: oxidation-reduction process	G
HC	2A	674028807	681028807	QTL_2A_3	-	1	***	sp|Q9V3D2|HEM6_DROME	Oxygen-dependent coproporphyrinogen-III oxidase	PF01218: Coproporphyrinogen III oxidase	IPR001260: Coproporphyrinogen III oxidase, aerobic; IPR018375: Coproporphyrinogen III oxidase, conserved site	GO:0004109 MF: coproporphyrinogen oxidase activity;GO:0006779 BP: porphyrin-containing compound biosynthetic process;GO:0055114 BP: oxidation-reduction process	G
HC	2A	674028807	681028807	QTL_2A_3	-	1	***	sp|Q9V3D2|HEM6_DROME	Oxygen-dependent coproporphyrinogen-III oxidase	PF01218: Coproporphyrinogen III oxidase	IPR001260: Coproporphyrinogen III oxidase, aerobic; IPR018375: Coproporphyrinogen III oxidase, conserved site	GO:0004109 MF: coproporphyrinogen oxidase activity;GO:0006779 BP: porphyrin-containing compound biosynthetic process;GO:0055114 BP: oxidation-reduction process	G
HC	2A	674028807	681028807	QTL_2A_3	+	1	***	tr|I1J1M9|I1J1M9_BRADI	Potassium transporter	PF02705: K+ potassium transporter	IPR003855: Potassium transporter	GO:0015079 MF: potassium ion transmembrane transporter activity;GO:0016020 CC: membrane;GO:0071805 BP: potassium ion transmembrane transport	G
HC	2A	674028807	681028807	QTL_2A_3	+	1	***	tr|I1J1M9|I1J1M9_BRADI	Potassium transporter	PF02705: K+ potassium transporter	IPR003855: Potassium transporter	GO:0015079 MF: potassium ion transmembrane transporter activity;GO:0016020 CC: membrane;GO:0071805 BP: potassium ion transmembrane transport	G
HC	2A	674028807	681028807	QTL_2A_3	+	1	***	tr|I1J1M9|I1J1M9_BRADI	Potassium transporter	PF02705: K+ potassium transporter	IPR003855: Potassium transporter	GO:0015079 MF: potassium ion transmembrane transporter activity;GO:0016020 CC: membrane;GO:0071805 BP: potassium ion transmembrane transport	G
HC	2A	674028807	681028807	QTL_2A_3	+	0	***	tr|M0UKK9|M0UKK9_HORVV	Potassium transporter	PF02705: K+ potassium transporter	IPR003855: Potassium transporter	GO:0015079 MF: potassium ion transmembrane transporter activity;GO:0016020 CC: membrane;GO:0071805 BP: potassium ion transmembrane transport	G
HC	2A	674028807	681028807	QTL_2A_3	+	0	***	tr|M0UKK9|M0UKK9_HORVV	Potassium transporter	PF02705: K+ potassium transporter	IPR003855: Potassium transporter	GO:0015079 MF: potassium ion transmembrane transporter activity;GO:0016020 CC: membrane;GO:0071805 BP: potassium ion transmembrane transport	G
HC	2A	674028807	681028807	QTL_2A_3	+	0	***	tr|M0UKK9|M0UKK9_HORVV	Potassium transporter	PF02705: K+ potassium transporter	IPR003855: Potassium transporter	GO:0015079 MF: potassium ion transmembrane transporter activity;GO:0016020 CC: membrane;GO:0071805 BP: potassium ion transmembrane transport	G
HC	2A	674028807	681028807	QTL_2A_3	-	1	***	tr|A0A193H6V8|A0A193H6V8_AEGBI	Cold-responsive protein WCOR15				G
HC	2A	674028807	681028807	QTL_2A_3	-	1	***	tr|A0A193H6V8|A0A193H6V8_AEGBI	Cold-responsive protein WCOR15				G
HC	2A	674028807	681028807	QTL_2A_3	-	1	***	tr|Q9FKV7|Q9FKV7_ARATH	Late embryogenesis abundant protein family protein				G
HC	2A	674028807	681028807	QTL_2A_3	+	1	***	tr|B8A2G4|B8A2G4_MAIZE	Yellow stripe-like transporter 17	PF03169: OPT oligopeptide transporter protein	IPR004813: Oligopeptide transporter, OPT superfamily	GO:0055085 BP: transmembrane transport	G
HC	2A	674028807	681028807	QTL_2A_3	-	1	--*	tr|O80781|O80781_ARATH	Polynucleotidyl transferase, ribonuclease H-like superfamily protein	PF13456: Reverse transcriptase-like	IPR012337: Ribonuclease H-like domain	GO:0003676 MF: nucleic acid binding	TE
HC	2A	674028807	681028807	QTL_2A_3	+	1	***	tr|A0A1D6RJJ8|A0A1D6RJJ8_WHEAT	Methionine aminopeptidase	PF00557: Metallopeptidase family M24	IPR000994: Peptidase M24; IPR001714: Peptidase M24, methionine aminopeptidase; IPR002467: Peptidase M24A, methionine aminopeptidase, subfamily 1	GO:0004177 MF: aminopeptidase activity;GO:0006508 BP: proteolysis;GO:0008235 MF: metalloexopeptidase activity	G
HC	2A	674028807	681028807	QTL_2A_3	+	1	***	tr|A0A1D6RJJ8|A0A1D6RJJ8_WHEAT	Methionine aminopeptidase	PF00557: Metallopeptidase family M24	IPR000994: Peptidase M24; IPR001714: Peptidase M24, methionine aminopeptidase; IPR002467: Peptidase M24A, methionine aminopeptidase, subfamily 1	GO:0004177 MF: aminopeptidase activity;GO:0006508 BP: proteolysis;GO:0008235 MF: metalloexopeptidase activity	G
HC	2A	674028807	681028807	QTL_2A_3	+	1	***	tr|A0A1D6RJJ8|A0A1D6RJJ8_WHEAT	Methionine aminopeptidase	PF00557: Metallopeptidase family M24	IPR000994: Peptidase M24; IPR001714: Peptidase M24, methionine aminopeptidase; IPR002467: Peptidase M24A, methionine aminopeptidase, subfamily 1	GO:0004177 MF: aminopeptidase activity;GO:0006508 BP: proteolysis;GO:0008235 MF: metalloexopeptidase activity	G
HC	2A	674028807	681028807	QTL_2A_3	+	0	***	tr|A0A1D6RJJ8|A0A1D6RJJ8_WHEAT	Methionine aminopeptidase	PF00557: Metallopeptidase family M24	IPR000994: Peptidase M24; IPR001714: Peptidase M24, methionine aminopeptidase; IPR002467: Peptidase M24A, methionine aminopeptidase, subfamily 1	GO:0004177 MF: aminopeptidase activity;GO:0006508 BP: proteolysis;GO:0008235 MF: metalloexopeptidase activity	G
HC	2A	674028807	681028807	QTL_2A_3	+	0	***	tr|A0A1D6RJJ8|A0A1D6RJJ8_WHEAT	Methionine aminopeptidase	PF00557: Metallopeptidase family M24	IPR000994: Peptidase M24; IPR001714: Peptidase M24, methionine aminopeptidase; IPR002467: Peptidase M24A, methionine aminopeptidase, subfamily 1	GO:0004177 MF: aminopeptidase activity;GO:0006508 BP: proteolysis;GO:0008235 MF: metalloexopeptidase activity	G
HC	2A	674028807	681028807	QTL_2A_3	+	0	***	tr|A0A1D6RJJ8|A0A1D6RJJ8_WHEAT	Methionine aminopeptidase	PF00557: Metallopeptidase family M24	IPR000994: Peptidase M24; IPR001714: Peptidase M24, methionine aminopeptidase; IPR002467: Peptidase M24A, methionine aminopeptidase, subfamily 1	GO:0004177 MF: aminopeptidase activity;GO:0006508 BP: proteolysis;GO:0008235 MF: metalloexopeptidase activity	G
LC	2A	674028807	681028807	QTL_2A_3	-	1	--*	AT3G27100.1	transcription/mRNA export factor				G
HC	2A	674028807	681028807	QTL_2A_3	-	1	*-*	tr|B9SYX3|B9SYX3_RICCO	Ethylene-responsive transcription factor, putative	PF00847: AP2 domain	IPR001471: AP2/ERF domain; IPR016177: DNA-binding domain	GO:0003677 MF: DNA binding;GO:0003700 MF: transcription factor activity, sequence-specific DNA binding;GO:0006355 BP: regulation of transcription, DNA-templated	G
HC	2A	674028807	681028807	QTL_2A_3	-	1	*-*	tr|B9SYX3|B9SYX3_RICCO	Ethylene-responsive transcription factor, putative	PF00847: AP2 domain	IPR001471: AP2/ERF domain; IPR016177: DNA-binding domain	GO:0003677 MF: DNA binding;GO:0003700 MF: transcription factor activity, sequence-specific DNA binding;GO:0006355 BP: regulation of transcription, DNA-templated	G
HC	2A	674028807	681028807	QTL_2A_3	-	1	*-*	tr|B9SYX3|B9SYX3_RICCO	Ethylene-responsive transcription factor, putative	PF00847: AP2 domain	IPR001471: AP2/ERF domain; IPR016177: DNA-binding domain	GO:0003677 MF: DNA binding;GO:0003700 MF: transcription factor activity, sequence-specific DNA binding;GO:0006355 BP: regulation of transcription, DNA-templated	G
HC	2A	674028807	681028807	QTL_2A_3	-	0	*-*	tr|A0A1E5UZU6|A0A1E5UZU6_9POAL	Protein strawberry notch-like protein 1	PF03004: Plant transposase (Ptta/En/Spm family)	IPR004252: Probable transposase, Ptta/En/Spm, plant		TE?
HC	2A	674028807	681028807	QTL_2A_3	-	0	*-*	tr|A0A1E5UZU6|A0A1E5UZU6_9POAL	Protein strawberry notch-like protein 1	PF03004: Plant transposase (Ptta/En/Spm family)	IPR004252: Probable transposase, Ptta/En/Spm, plant		TE?
HC	2A	674028807	681028807	QTL_2A_3	-	0	*-*	tr|A0A1E5UZU6|A0A1E5UZU6_9POAL	Protein strawberry notch-like protein 1	PF03004: Plant transposase (Ptta/En/Spm family)	IPR004252: Probable transposase, Ptta/En/Spm, plant		TE?
HC	2A	674028807	681028807	QTL_2A_3	-	0	*-*	tr|A0A1E5UZU6|A0A1E5UZU6_9POAL	Protein strawberry notch-like protein 1				G
HC	2A	674028807	681028807	QTL_2A_3	-	0	--*	tr|Q2QRF2|Q2QRF2_ORYSJ	Transposon protein, putative, CACTA, En/Spm sub-class, expressed	PF03004: Plant transposase (Ptta/En/Spm family)	IPR004252: Probable transposase, Ptta/En/Spm, plant		TE
HC	2A	674028807	681028807	QTL_2A_3	-	0	--*	sp|P15268|MOSA_MAIZE	Autonomous transposable element EN-1 mosaic protein	PF03004: Plant transposase (Ptta/En/Spm family)	IPR004252: Probable transposase, Ptta/En/Spm, plant		TE
HC	2A	674028807	681028807	QTL_2A_3	-	0	--*	tr|Q2QRF2|Q2QRF2_ORYSJ	Transposon protein, putative, CACTA, En/Spm sub-class, expressed	PF03004: Plant transposase (Ptta/En/Spm family)	IPR004252: Probable transposase, Ptta/En/Spm, plant		TE
HC	2A	674028807	681028807	QTL_2A_3	-	0	--*	tr|Q2QRF2|Q2QRF2_ORYSJ	Transposon protein, putative, CACTA, En/Spm sub-class, expressed	PF03004: Plant transposase (Ptta/En/Spm family)	IPR004252: Probable transposase, Ptta/En/Spm, plant		TE
HC	2A	674028807	681028807	QTL_2A_3	-	0	--*	tr|Q2QRF2|Q2QRF2_ORYSJ	Transposon protein, putative, CACTA, En/Spm sub-class, expressed	PF03004: Plant transposase (Ptta/En/Spm family)	IPR004252: Probable transposase, Ptta/En/Spm, plant		TE
HC	2A	674028807	681028807	QTL_2A_3	-	0	--*	sp|P15268|MOSA_MAIZE	Autonomous transposable element EN-1 mosaic protein	PF03004: Plant transposase (Ptta/En/Spm family)	IPR004252: Probable transposase, Ptta/En/Spm, plant		TE
HC	2A	674028807	681028807	QTL_2A_3	-	1	--*	AT4G20380.8	LSD1 zinc finger family protein	PF03004: Plant transposase (Ptta/En/Spm family)	IPR004252: Probable transposase, Ptta/En/Spm, plant		TE
HC	2A	674028807	681028807	QTL_2A_3	-	0	*-*	tr|A0A1E5UZU6|A0A1E5UZU6_9POAL	Protein strawberry notch-like protein 1	PF03004: Plant transposase (Ptta/En/Spm family)	IPR004252: Probable transposase, Ptta/En/Spm, plant		TE?
HC	2A	674028807	681028807	QTL_2A_3	-	1	***	tr|S4X2P3|S4X2P3_GOSBA	Receptor-like kinase	PF00069: Protein kinase domain	IPR000719: Protein kinase domain; IPR008271: Serine/threonine-protein kinase, active site; IPR011009: Protein kinase-like domain; IPR017441: Protein kinase, ATP binding site	GO:0004672 MF: protein kinase activity;GO:0005524 MF: ATP binding;GO:0006468 BP: protein phosphorylation	G
HC	2A	674028807	681028807	QTL_2A_3	-	1	***	tr|S4X2P3|S4X2P3_GOSBA	Receptor-like kinase	PF00069: Protein kinase domain	IPR000719: Protein kinase domain; IPR008271: Serine/threonine-protein kinase, active site; IPR011009: Protein kinase-like domain; IPR017441: Protein kinase, ATP binding site	GO:0004672 MF: protein kinase activity;GO:0005524 MF: ATP binding;GO:0006468 BP: protein phosphorylation	G
HC	2A	674028807	681028807	QTL_2A_3	-	1	***	tr|S4X2P3|S4X2P3_GOSBA	Receptor-like kinase	PF00069: Protein kinase domain	IPR000719: Protein kinase domain; IPR008271: Serine/threonine-protein kinase, active site; IPR011009: Protein kinase-like domain; IPR017441: Protein kinase, ATP binding site	GO:0004672 MF: protein kinase activity;GO:0005524 MF: ATP binding;GO:0006468 BP: protein phosphorylation	G
HC	2A	674028807	681028807	QTL_2A_3	+	0	*-*	tr|A0A0B0N352|A0A0B0N352_GOSAR	Laminin subunit beta-1	PF03004: Plant transposase (Ptta/En/Spm family)	IPR004252: Probable transposase, Ptta/En/Spm, plant		TE?
HC	2A	674028807	681028807	QTL_2A_3	+	1	*-*	tr|A0A1E5UZU6|A0A1E5UZU6_9POAL	Protein strawberry notch-like protein 1	PF03004: Plant transposase (Ptta/En/Spm family)	IPR004252: Probable transposase, Ptta/En/Spm, plant		TE?
HC	2A	674028807	681028807	QTL_2A_3	+	0	*-*	tr|A0A0B0N352|A0A0B0N352_GOSAR	Laminin subunit beta-1	PF03004: Plant transposase (Ptta/En/Spm family)	IPR004252: Probable transposase, Ptta/En/Spm, plant		TE?
HC	2A	674028807	681028807	QTL_2A_3	+	1	*-*	tr|A0A1E5UZU6|A0A1E5UZU6_9POAL	Protein strawberry notch-like protein 1	PF03004: Plant transposase (Ptta/En/Spm family)	IPR004252: Probable transposase, Ptta/En/Spm, plant		TE?
LC	2A	674028807	681028807	QTL_2A_3	+	1	--*	tr|A0A0K9P8B8|A0A0K9P8B8_ZOSMR	Zinc finger protein LSD1				TE?
LC	2A	674028807	681028807	QTL_2A_3	+	1	--*	AT1G53890.5	LURP-one-like protein (DUF567)				G
LC	2A	674028807	681028807	QTL_2A_3	+	1	--*	AT1G54280.3	ATPase E1-E2 type family protein / haloacid dehalogenase-like hydrolase family protein				G
LC	2A	674028807	681028807	QTL_2A_3	+	1	--*	sp|Q29RP9|GATA_BOVIN	Glutamyl-tRNA(Gln) amidotransferase subunit A, mitochondrial				G
HC	2A	674028807	681028807	QTL_2A_3	+	1	***	tr|V5ZDZ5|V5ZDZ5_9POAL	Cytochrome P450	PF00067: Cytochrome P450	IPR001128: Cytochrome P450; IPR002401: Cytochrome P450, E-class, group I; IPR017972: Cytochrome P450, conserved site	GO:0005506 MF: iron ion binding;GO:0016705 MF: oxidoreductase activity, acting on paired donors, with incorporation or reduction of molecular oxygen;GO:0020037 MF: heme binding;GO:0055114 BP: oxidation-reduction process	G
HC	2A	674028807	681028807	QTL_2A_3	+	1	***	tr|V5ZDZ5|V5ZDZ5_9POAL	Cytochrome P450	PF00067: Cytochrome P450	IPR001128: Cytochrome P450; IPR002401: Cytochrome P450, E-class, group I; IPR017972: Cytochrome P450, conserved site	GO:0005506 MF: iron ion binding;GO:0016705 MF: oxidoreductase activity, acting on paired donors, with incorporation or reduction of molecular oxygen;GO:0020037 MF: heme binding;GO:0055114 BP: oxidation-reduction process	G
HC	2A	674028807	681028807	QTL_2A_3	+	1	***	tr|V5ZDZ5|V5ZDZ5_9POAL	Cytochrome P450	PF00067: Cytochrome P450	IPR001128: Cytochrome P450; IPR002401: Cytochrome P450, E-class, group I; IPR017972: Cytochrome P450, conserved site	GO:0005506 MF: iron ion binding;GO:0016705 MF: oxidoreductase activity, acting on paired donors, with incorporation or reduction of molecular oxygen;GO:0020037 MF: heme binding;GO:0055114 BP: oxidation-reduction process	G
HC	2A	674028807	681028807	QTL_2A_3	+	1	***	tr|V5ZDZ5|V5ZDZ5_9POAL	Cytochrome P450	PF00067: Cytochrome P450	IPR001128: Cytochrome P450; IPR002401: Cytochrome P450, E-class, group I; IPR017972: Cytochrome P450, conserved site	GO:0005506 MF: iron ion binding;GO:0016705 MF: oxidoreductase activity, acting on paired donors, with incorporation or reduction of molecular oxygen;GO:0020037 MF: heme binding;GO:0055114 BP: oxidation-reduction process	G
LC	2A	674028807	681028807	QTL_2A_3	-	1	--*	sp|Q6AYK8|EIF3D_RAT	Eukaryotic translation initiation factor 3 subunit D				G
LC	2A	674028807	681028807	QTL_2A_3	+	1	--*	tr|A2Q137|A2Q137_MEDTR	RNA-directed DNA polymerase (Reverse transcriptase)	PF13966: zinc-binding in reverse transcriptase	IPR026960: Reverse transcriptase zinc-binding domain		TE
LC	2A	674028807	681028807	QTL_2A_3	-	1	*-*	tr|A0A1D5S8D1|A0A1D5S8D1_WHEAT	CASP-like protein	PF04535: Domain of unknown function (DUF588)	IPR006702: Domain of unknown function DUF588		G
HC	2A	744943578	751943578	QTL_2A_4	+	1	-**	AT5G18880.1	RNA-directed DNA polymerase (reverse transcriptase)-related family protein	PF13966: zinc-binding in reverse transcriptase	IPR026960: Reverse transcriptase zinc-binding domain		TE
HC	2A	744943578	751943578	QTL_2A_4	+	1	-**	tr|B3H545|B3H545_ARATH	Conserved peptide upstream open reading frame 21				G
HC	2A	744943578	751943578	QTL_2A_4	+	1	***	tr|A0A072UZF2|A0A072UZF2_MEDTR	Loricrin-like protein				G
LC	2A	744943578	751943578	QTL_2A_4	+	1	*-*	tr|A0A1J3HTG0|A0A1J3HTG0_NOCCA	F-box protein	PF00646: F-box domain	IPR001810: F-box domain	GO:0005515 MF: protein binding	TE?
HC	2A	744943578	751943578	QTL_2A_4	-	1	***	tr|M8CYZ5|M8CYZ5_AEGTA	Programmed cell death protein 2-like protein	PF04194: Programmed cell death protein 2, C-terminal putative domain	IPR007320: Programmed cell death protein 2, C-terminal	GO:0005737 CC: cytoplasm	G
HC	2A	744943578	751943578	QTL_2A_4	-	0	***	tr|M8CYZ5|M8CYZ5_AEGTA	Programmed cell death protein 2-like protein	PF04194: Programmed cell death protein 2, C-terminal putative domain	IPR007320: Programmed cell death protein 2, C-terminal	GO:0005737 CC: cytoplasm	G
HC	2A	744943578	751943578	QTL_2A_4	+	0	***	tr|Q6RXY3|Q6RXY3_FRAAN	Beta xylosidase	PF00933: Glycosyl hydrolase family 3 N terminal domain; PF01915: Glycosyl hydrolase family 3 C-terminal domain; PF14310: Fibronectin type III-like domain	IPR001764: Glycoside hydrolase, family 3, N-terminal; IPR002772: Glycoside hydrolase family 3 C-terminal domain; IPR013783: Immunoglobulin-like fold; IPR017853: Glycoside hydrolase superfamily; IPR026891: Fibronectin type III-like domain	GO:0004553 MF: hydrolase activity, hydrolyzing O-glycosyl compounds;GO:0005975 BP: carbohydrate metabolic process	G
HC	2A	744943578	751943578	QTL_2A_4	+	0	***	tr|Q6RXY3|Q6RXY3_FRAAN	Beta xylosidase	PF00933: Glycosyl hydrolase family 3 N terminal domain; PF01915: Glycosyl hydrolase family 3 C-terminal domain; PF14310: Fibronectin type III-like domain	IPR001764: Glycoside hydrolase, family 3, N-terminal; IPR002772: Glycoside hydrolase family 3 C-terminal domain; IPR013783: Immunoglobulin-like fold; IPR017853: Glycoside hydrolase superfamily; IPR026891: Fibronectin type III-like domain	GO:0004553 MF: hydrolase activity, hydrolyzing O-glycosyl compounds;GO:0005975 BP: carbohydrate metabolic process	G
HC	2A	744943578	751943578	QTL_2A_4	+	1	***	tr|Q6RXY3|Q6RXY3_FRAAN	Beta xylosidase	PF00933: Glycosyl hydrolase family 3 N terminal domain; PF01915: Glycosyl hydrolase family 3 C-terminal domain; PF14310: Fibronectin type III-like domain	IPR001764: Glycoside hydrolase, family 3, N-terminal; IPR002772: Glycoside hydrolase family 3 C-terminal domain; IPR013783: Immunoglobulin-like fold; IPR017853: Glycoside hydrolase superfamily; IPR026891: Fibronectin type III-like domain	GO:0004553 MF: hydrolase activity, hydrolyzing O-glycosyl compounds;GO:0005975 BP: carbohydrate metabolic process	G
HC	2A	744943578	751943578	QTL_2A_4	+	1	***	tr|Q6RXY3|Q6RXY3_FRAAN	Beta xylosidase	PF00933: Glycosyl hydrolase family 3 N terminal domain; PF01915: Glycosyl hydrolase family 3 C-terminal domain; PF14310: Fibronectin type III-like domain	IPR001764: Glycoside hydrolase, family 3, N-terminal; IPR002772: Glycoside hydrolase family 3 C-terminal domain; IPR013783: Immunoglobulin-like fold; IPR017853: Glycoside hydrolase superfamily; IPR026891: Fibronectin type III-like domain	GO:0004553 MF: hydrolase activity, hydrolyzing O-glycosyl compounds;GO:0005975 BP: carbohydrate metabolic process	G
HC	2A	744943578	751943578	QTL_2A_4	+	0	***	tr|B6TNA7|B6TNA7_MAIZE	Shikimate kinase	PF01202: Shikimate kinase	IPR000623: Shikimate kinase/Threonine synthase-like 1; IPR023000: Shikimate kinase, conserved site; IPR027417: P-loop containing nucleoside triphosphate hydrolase; IPR031322: Shikimate kinase/gluconokinase		G
HC	2A	744943578	751943578	QTL_2A_4	+	1	***	tr|B6TNA7|B6TNA7_MAIZE	Shikimate kinase	PF01202: Shikimate kinase	IPR000623: Shikimate kinase/Threonine synthase-like 1; IPR023000: Shikimate kinase, conserved site; IPR027417: P-loop containing nucleoside triphosphate hydrolase; IPR031322: Shikimate kinase/gluconokinase		G
HC	2A	744943578	751943578	QTL_2A_4	+	0	***	tr|B6TNA7|B6TNA7_MAIZE	Shikimate kinase	PF01202: Shikimate kinase	IPR000623: Shikimate kinase/Threonine synthase-like 1; IPR023000: Shikimate kinase, conserved site; IPR027417: P-loop containing nucleoside triphosphate hydrolase; IPR031322: Shikimate kinase/gluconokinase		G
HC	2A	744943578	751943578	QTL_2A_4	-	0	--*	AT5G21222.4	protein kinase family protein		IPR011009: Protein kinase-like domain		G
HC	2A	744943578	751943578	QTL_2A_4	-	1	***	tr|A0A061FJA5|A0A061FJA5_THECC	Kinase superfamily protein	PF03109: ABC1 family	IPR000719: Protein kinase domain; IPR004147: UbiB domain; IPR011009: Protein kinase-like domain	GO:0004672 MF: protein kinase activity;GO:0005524 MF: ATP binding;GO:0006468 BP: protein phosphorylation	G
HC	2A	744943578	751943578	QTL_2A_4	-	1	***	tr|A0A061FJA5|A0A061FJA5_THECC	Kinase superfamily protein	PF03109: ABC1 family	IPR000719: Protein kinase domain; IPR004147: UbiB domain; IPR011009: Protein kinase-like domain	GO:0004672 MF: protein kinase activity;GO:0005524 MF: ATP binding;GO:0006468 BP: protein phosphorylation	G
HC	2A	744943578	751943578	QTL_2A_4	-	1	***	tr|A0A061FJA5|A0A061FJA5_THECC	Kinase superfamily protein	PF03109: ABC1 family	IPR000719: Protein kinase domain; IPR004147: UbiB domain; IPR011009: Protein kinase-like domain	GO:0004672 MF: protein kinase activity;GO:0005524 MF: ATP binding;GO:0006468 BP: protein phosphorylation	G
HC	2A	744943578	751943578	QTL_2A_4	+	1	*-*	AT1G54680.3	translation initiation factor 3 subunit I				G
LC	2A	744943578	751943578	QTL_2A_4	-	1	--*	sp|Q7UXT7|Y1129_RHOBA	UPF0753 protein RB1129				G
HC	2A	744943578	751943578	QTL_2A_4	-	1	--*	tr|A0A1J3EID7|A0A1J3EID7_NOCCA	Early light-induced protein 2, chloroplastic	PF00504: Chlorophyll A-B binding protein	IPR022796: Chlorophyll A-B binding protein; IPR023329: Chlorophyll a/b binding protein domain		G
LC	2A	744943578	751943578	QTL_2A_4	-	1	*-*	tr|A0A103YIH6|A0A103YIH6_CYNCS	Transcription factor, MADS-box	PF00319: SRF-type transcription factor (DNA-binding and dimerisation domain)	IPR002100: Transcription factor, MADS-box	GO:0003677 MF: DNA binding;GO:0046983 MF: protein dimerization activity	G
LC	2A	744943578	751943578	QTL_2A_4	-	1	*-*	tr|A0A103YIH6|A0A103YIH6_CYNCS	Transcription factor, MADS-box	PF00319: SRF-type transcription factor (DNA-binding and dimerisation domain)	IPR002100: Transcription factor, MADS-box	GO:0003677 MF: DNA binding;GO:0046983 MF: protein dimerization activity	G
LC	2A	744943578	751943578	QTL_2A_4	-	1	--*	AT2G02520.1	RNA-directed DNA polymerase (reverse transcriptase)-related family protein				TE
LC	2A	744943578	751943578	QTL_2A_4	-	1	*-*	tr|Q53P52|Q53P52_ORYSJ	Retrotransposon protein, putative, LINE subclass				TE
HC	2A	744943578	751943578	QTL_2A_4	-	1	--*	AT1G15780.3	mediator of RNA polymerase II transcription subunit 15a-like protein				G
HC	2A	744943578	751943578	QTL_2A_4	-	1	***	tr|A0A103YIE3|A0A103YIE3_CYNCS	Transcription factor, MADS-box	PF00319: SRF-type transcription factor (DNA-binding and dimerisation domain)	IPR002100: Transcription factor, MADS-box; IPR011146: HIT-like domain	GO:0003677 MF: DNA binding;GO:0003824 MF: catalytic activity;GO:0046983 MF: protein dimerization activity	G
HC	2A	744943578	751943578	QTL_2A_4	-	1	***	tr|A0A103YIE3|A0A103YIE3_CYNCS	Transcription factor, MADS-box	PF00319: SRF-type transcription factor (DNA-binding and dimerisation domain)	IPR002100: Transcription factor, MADS-box; IPR011146: HIT-like domain	GO:0003677 MF: DNA binding;GO:0003824 MF: catalytic activity;GO:0046983 MF: protein dimerization activity	G
HC	2A	744943578	751943578	QTL_2A_4	-	1	***	tr|A0A103YIE3|A0A103YIE3_CYNCS	Transcription factor, MADS-box	PF00319: SRF-type transcription factor (DNA-binding and dimerisation domain)	IPR002100: Transcription factor, MADS-box; IPR011146: HIT-like domain	GO:0003677 MF: DNA binding;GO:0003824 MF: catalytic activity;GO:0046983 MF: protein dimerization activity	G
HC	2A	744943578	751943578	QTL_2A_4	-	1	--*	AT5G11180.2	glutamate receptor 2.6				G
HC	2A	744943578	751943578	QTL_2A_4	-	1	--*	AT2G24680.9	transcriptional factor B3 family protein				G
HC	2A	744943578	751943578	QTL_2A_4	-	1	--*	sp|B5ENA2|DNAJ_ACIF5	Chaperone protein DnaJ				G
HC	2A	744943578	751943578	QTL_2A_4	-	0	--*	AT5G11210.4	glutamate receptor 2.5				G
LC	2A	744943578	751943578	QTL_2A_4	-	1	--*	AT5G43280.2	delta(3,5),delta(2,4)-dienoyl-CoA isomerase 1				G
LC	2A	744943578	751943578	QTL_2A_4	-	1	--*	AT2G21400.3	SHI-related sequence3				G
LC	2A	744943578	751943578	QTL_2A_4	-	1	*-*	tr|Q2QLW7|Q2QLW7_ORYSJ	Retrotransposon protein, putative, unclassified	PF13966: zinc-binding in reverse transcriptase	IPR026960: Reverse transcriptase zinc-binding domain		TE
LC	2A	744943578	751943578	QTL_2A_4	-	1	--*	AT1G72700.3	ATPase E1-E2 type family protein / haloacid dehalogenase-like hydrolase family protein				G
LC	2A	744943578	751943578	QTL_2A_4	-	1	--*	AT5G64360.7	Chaperone DnaJ-domain superfamily protein				G
LC	2A	744943578	751943578	QTL_2A_4	-	1	--*	AT3G26100.6	Regulator of chromosome condensation (RCC1) family protein				G
HC	2A	744943578	751943578	QTL_2A_4	-	1	***	tr|M8B7W5|M8B7W5_AEGTA	Pentatricopeptide repeat-containing protein	PF01535: PPR repeat; PF12854: PPR repeat; PF13041: PPR repeat family	IPR002885: Pentatricopeptide repeat; IPR011990: Tetratricopeptide-like helical domain	GO:0005515 MF: protein binding	G
LC	2A	744943578	751943578	QTL_2A_4	+	1	*-*	tr|A0A072TIS8|A0A072TIS8_MEDTR	Endonuclease/exonuclease/phosphatase family protein		IPR005135: Endonuclease/exonuclease/phosphatase		TE?
LC	2A	744943578	751943578	QTL_2A_4	+	1	*-*	tr|A2Q338|A2Q338_MEDTR	RNA-directed DNA polymerase (Reverse transcriptase)				TE
HC	2A	744943578	751943578	QTL_2A_4	-	1	--*	sp|Q8DXX6|MUTS2_STRA5	Endonuclease MutS2				G
HC	2A	744943578	751943578	QTL_2A_4	-	1	***	tr|A0A1E5VE17|A0A1E5VE17_9POAL	Protein MIZU-KUSSEI 1	PF04759: Protein of unknown function, DUF617	IPR006460: Protein MIZU-KUSSEI 1-like, plant		G
LC	2A	744943578	751943578	QTL_2A_4	+	1	--*	sp|Q16X15|MED24_AEDAE	Mediator of RNA polymerase II transcription subunit 24				G
HC	2A	744943578	751943578	QTL_2A_4	-	1	*-*	tr|B9SYX3|B9SYX3_RICCO	Ethylene-responsive transcription factor, putative	PF00847: AP2 domain	IPR001471: AP2/ERF domain; IPR016177: DNA-binding domain	GO:0003677 MF: DNA binding;GO:0003700 MF: transcription factor activity, sequence-specific DNA binding;GO:0006355 BP: regulation of transcription, DNA-templated	G
HC	2A	744943578	751943578	QTL_2A_4	-	1	*-*	tr|B9SYX3|B9SYX3_RICCO	Ethylene-responsive transcription factor, putative	PF00847: AP2 domain	IPR001471: AP2/ERF domain; IPR016177: DNA-binding domain	GO:0003677 MF: DNA binding;GO:0003700 MF: transcription factor activity, sequence-specific DNA binding;GO:0006355 BP: regulation of transcription, DNA-templated	G
HC	2A	744943578	751943578	QTL_2A_4	-	1	*-*	tr|B9SYX3|B9SYX3_RICCO	Ethylene-responsive transcription factor, putative	PF00847: AP2 domain	IPR001471: AP2/ERF domain; IPR016177: DNA-binding domain	GO:0003677 MF: DNA binding;GO:0003700 MF: transcription factor activity, sequence-specific DNA binding;GO:0006355 BP: regulation of transcription, DNA-templated	G
LC	2A	744943578	751943578	QTL_2A_4	+	1	--*	AT5G23210.5	serine carboxypeptidase-like 34				G
HC	2A	744943578	751943578	QTL_2A_4	+	1	***	tr|M8BR67|M8BR67_AEGTA	Serine/threonine-protein kinase	PF01453: D-mannose binding lectin; PF00954: S-locus glycoprotein domain; PF08276: PAN-like domain; PF00069: Protein kinase domain	IPR000719: Protein kinase domain; IPR000858: S-locus glycoprotein domain; IPR001480: Bulb-type lectin domain; IPR003609: PAN/Apple domain; IPR008271: Serine/threonine-protein kinase, active site; IPR011009: Protein kinase-like domain; IPR017441: Protein kinase, ATP binding site	GO:0004672 MF: protein kinase activity;GO:0005524 MF: ATP binding;GO:0006468 BP: protein phosphorylation;GO:0048544 BP: recognition of pollen	G
HC	2A	744943578	751943578	QTL_2A_4	+	1	***	tr|M8BR67|M8BR67_AEGTA	Serine/threonine-protein kinase	PF01453: D-mannose binding lectin; PF00954: S-locus glycoprotein domain; PF08276: PAN-like domain; PF00069: Protein kinase domain	IPR000719: Protein kinase domain; IPR000858: S-locus glycoprotein domain; IPR001480: Bulb-type lectin domain; IPR003609: PAN/Apple domain; IPR008271: Serine/threonine-protein kinase, active site; IPR011009: Protein kinase-like domain; IPR017441: Protein kinase, ATP binding site	GO:0004672 MF: protein kinase activity;GO:0005524 MF: ATP binding;GO:0006468 BP: protein phosphorylation;GO:0048544 BP: recognition of pollen	G
HC	2A	744943578	751943578	QTL_2A_4	+	1	***	tr|M8BR67|M8BR67_AEGTA	Serine/threonine-protein kinase	PF01453: D-mannose binding lectin; PF00954: S-locus glycoprotein domain; PF08276: PAN-like domain; PF00069: Protein kinase domain	IPR000719: Protein kinase domain; IPR000858: S-locus glycoprotein domain; IPR001480: Bulb-type lectin domain; IPR003609: PAN/Apple domain; IPR008271: Serine/threonine-protein kinase, active site; IPR011009: Protein kinase-like domain; IPR017441: Protein kinase, ATP binding site	GO:0004672 MF: protein kinase activity;GO:0005524 MF: ATP binding;GO:0006468 BP: protein phosphorylation;GO:0048544 BP: recognition of pollen	G
HC	2A	744943578	751943578	QTL_2A_4	+	1	***	tr|M8BR67|M8BR67_AEGTA	Serine/threonine-protein kinase	PF01453: D-mannose binding lectin; PF00954: S-locus glycoprotein domain; PF08276: PAN-like domain; PF00069: Protein kinase domain	IPR000719: Protein kinase domain; IPR000858: S-locus glycoprotein domain; IPR001480: Bulb-type lectin domain; IPR003609: PAN/Apple domain; IPR008271: Serine/threonine-protein kinase, active site; IPR011009: Protein kinase-like domain; IPR017441: Protein kinase, ATP binding site	GO:0004672 MF: protein kinase activity;GO:0005524 MF: ATP binding;GO:0006468 BP: protein phosphorylation;GO:0048544 BP: recognition of pollen	G
HC	2A	744943578	751943578	QTL_2A_4	+	1	***	tr|A0A0N9H132|A0A0N9H132_MAIZE	Plant elicitor peptide 2				G
LC	2A	744943578	751943578	QTL_2A_4	+	1	--*	tr|O80781|O80781_ARATH	Polynucleotidyl transferase, ribonuclease H-like superfamily protein	PF13456: Reverse transcriptase-like			TE
LC	2A	744943578	751943578	QTL_2A_4	-	1	*-*	tr|M8BH66|M8BH66_AEGTA	Protein FAR1-RELATED SEQUENCE 5	PF10551: MULE transposase domain	IPR018289: MULE transposase domain		TE
HC	2A	744943578	751943578	QTL_2A_4	+	1	***	tr|M8A766|M8A766_TRIUA	Anthocyanin 5-aromatic acyltransferase	PF02458: Transferase family	IPR003480: Transferase	GO:0016747 MF: transferase activity, transferring acyl groups other than amino-acyl groups	G
HC	2A	744943578	751943578	QTL_2A_4	+	1	***	tr|M8A766|M8A766_TRIUA	Anthocyanin 5-aromatic acyltransferase	PF02458: Transferase family	IPR003480: Transferase	GO:0016747 MF: transferase activity, transferring acyl groups other than amino-acyl groups	G
HC	2A	744943578	751943578	QTL_2A_4	+	1	***	tr|M8A766|M8A766_TRIUA	Anthocyanin 5-aromatic acyltransferase	PF02458: Transferase family	IPR003480: Transferase	GO:0016747 MF: transferase activity, transferring acyl groups other than amino-acyl groups	G
LC	2A	744943578	751943578	QTL_2A_4	-	1	--*	sp|Q5RBB1|SENP1_PONAB	Sentrin-specific protease 1	PF02902: Ulp1 protease family, C-terminal catalytic domain	IPR003653: Ulp1 protease family, C-terminal catalytic domain	GO:0006508 BP: proteolysis;GO:0008234 MF: cysteine-type peptidase activity	G
LC	2A	744943578	751943578	QTL_2A_4	-	1	--*	sp|Q5RBB1|SENP1_PONAB	Sentrin-specific protease 1	PF02902: Ulp1 protease family, C-terminal catalytic domain	IPR003653: Ulp1 protease family, C-terminal catalytic domain	GO:0006508 BP: proteolysis;GO:0008234 MF: cysteine-type peptidase activity	G
LC	2A	744943578	751943578	QTL_2A_4	-	1	--*	sp|Q03N21|PTH_STRTD	Peptidyl-tRNA hydrolase				G
LC	2A	744943578	751943578	QTL_2A_4	-	1	--*	tr|A0A0B2S0B1|A0A0B2S0B1_GLYSO	E3 ubiquitin-protein ligase SINA-like 10				G
LC	2A	744943578	751943578	QTL_2A_4	-	1	*-*	tr|A0A151R559|A0A151R559_CAJCA	Protein FAR1-RELATED SEQUENCE 5		IPR007527: Zinc finger, SWIM-type	GO:0008270 MF: zinc ion binding	TE
LC	2A	744943578	751943578	QTL_2A_4	-	1	*-*	tr|A0A151SA71|A0A151SA71_CAJCA	Protein FAR1-RELATED SEQUENCE 5	PF03101: FAR1 DNA-binding domain	IPR004330: FAR1 DNA binding domain		TE
HC	2A	744943578	751943578	QTL_2A_4	+	1	***	tr|M8A766|M8A766_TRIUA	Anthocyanin 5-aromatic acyltransferase	PF02458: Transferase family	IPR003480: Transferase	GO:0016747 MF: transferase activity, transferring acyl groups other than amino-acyl groups	G
HC	2A	744943578	751943578	QTL_2A_4	+	1	***	tr|C6ZRX7|C6ZRX7_SOYBN	Protein kinase	PF07714: Protein tyrosine kinase	IPR000719: Protein kinase domain; IPR001245: Serine-threonine/tyrosine-protein kinase, catalytic domain; IPR011009: Protein kinase-like domain; IPR017441: Protein kinase, ATP binding site	GO:0004672 MF: protein kinase activity;GO:0005524 MF: ATP binding;GO:0006468 BP: protein phosphorylation	G
HC	2A	744943578	751943578	QTL_2A_4	+	1	***	tr|C6ZRX7|C6ZRX7_SOYBN	Protein kinase	PF07714: Protein tyrosine kinase	IPR000719: Protein kinase domain; IPR001245: Serine-threonine/tyrosine-protein kinase, catalytic domain; IPR011009: Protein kinase-like domain; IPR017441: Protein kinase, ATP binding site	GO:0004672 MF: protein kinase activity;GO:0005524 MF: ATP binding;GO:0006468 BP: protein phosphorylation	G
HC	2A	744943578	751943578	QTL_2A_4	+	1	***	tr|C6ZRX7|C6ZRX7_SOYBN	Protein kinase	PF07714: Protein tyrosine kinase	IPR000719: Protein kinase domain; IPR001245: Serine-threonine/tyrosine-protein kinase, catalytic domain; IPR011009: Protein kinase-like domain; IPR017441: Protein kinase, ATP binding site	GO:0004672 MF: protein kinase activity;GO:0005524 MF: ATP binding;GO:0006468 BP: protein phosphorylation	G
LC	2A	744943578	751943578	QTL_2A_4	-	1	***	tr|A0A0F6NMN7|A0A0F6NMN7_9POAL	30S ribosomal protein S15	PF00312: Ribosomal protein S15	IPR000589: Ribosomal protein S15; IPR009068: S15/NS1, RNA-binding	GO:0003735 MF: structural constituent of ribosome;GO:0005622 CC: intracellular;GO:0005840 CC: ribosome;GO:0006412 BP: translation	G
LC	2A	744943578	751943578	QTL_2A_4	-	1	***	tr|A0A0F6NMN7|A0A0F6NMN7_9POAL	30S ribosomal protein S15	PF00312: Ribosomal protein S15	IPR000589: Ribosomal protein S15; IPR009068: S15/NS1, RNA-binding	GO:0003735 MF: structural constituent of ribosome;GO:0005622 CC: intracellular;GO:0005840 CC: ribosome;GO:0006412 BP: translation	G
LC	2A	744943578	751943578	QTL_2A_4	-	1	***	tr|A0A0F6NMN7|A0A0F6NMN7_9POAL	30S ribosomal protein S15	PF00312: Ribosomal protein S15	IPR000589: Ribosomal protein S15; IPR009068: S15/NS1, RNA-binding	GO:0003735 MF: structural constituent of ribosome;GO:0005622 CC: intracellular;GO:0005840 CC: ribosome;GO:0006412 BP: translation	G
LC	2A	744943578	751943578	QTL_2A_4	-	1	***	tr|A0A0F6NMN7|A0A0F6NMN7_9POAL	30S ribosomal protein S15	PF00312: Ribosomal protein S15	IPR000589: Ribosomal protein S15; IPR009068: S15/NS1, RNA-binding	GO:0003735 MF: structural constituent of ribosome;GO:0005622 CC: intracellular;GO:0005840 CC: ribosome;GO:0006412 BP: translation	G
HC	2A	744943578	751943578	QTL_2A_4	+	0	--*	AT4G15396.4	cytochrome P450, family 702, subfamily A, polypeptide 6				G
HC	2A	744943578	751943578	QTL_2A_4	+	1	*-*	tr|Q0DV73|Q0DV73_ORYSJ	(RAP Annotation release2) Conserved hypothetical protein				U
HC	2A	744943578	751943578	QTL_2A_4	+	0	--*	AT4G15330.2	cytochrome P450, family 705, subfamily A, polypeptide 1				G
LC	2A	744943578	751943578	QTL_2A_4	+	1	--*	tr|A0A061GI07|A0A061GI07_THECC	Centromere protein C, putative isoform 3				G
HC	2A	744943578	751943578	QTL_2A_4	-	1	***	tr|M8A1U0|M8A1U0_TRIUA	Lipoxygenase	PF00305: Lipoxygenase	IPR001024: PLAT/LH2 domain; IPR001246: Lipoxygenase, plant; IPR013819: Lipoxygenase, C-terminal; IPR020834: Lipoxygenase, conserved site; IPR027433: Lipoxygenase, domain 3	GO:0005515 MF: protein binding;GO:0016491 MF: oxidoreductase activity;GO:0016702 MF: oxidoreductase activity, acting on single donors with incorporation of molecular oxygen, incorporation of two atoms of oxygen;GO:0046872 MF: metal ion binding;GO:0055114 BP: oxidation-reduction process	G
HC	2A	744943578	751943578	QTL_2A_4	-	1	***	tr|M8A1U0|M8A1U0_TRIUA	Lipoxygenase	PF00305: Lipoxygenase	IPR001024: PLAT/LH2 domain; IPR001246: Lipoxygenase, plant; IPR013819: Lipoxygenase, C-terminal; IPR020834: Lipoxygenase, conserved site; IPR027433: Lipoxygenase, domain 3	GO:0005515 MF: protein binding;GO:0016491 MF: oxidoreductase activity;GO:0016702 MF: oxidoreductase activity, acting on single donors with incorporation of molecular oxygen, incorporation of two atoms of oxygen;GO:0046872 MF: metal ion binding;GO:0055114 BP: oxidation-reduction process	G
HC	2A	744943578	751943578	QTL_2A_4	-	1	***	tr|M8A1U0|M8A1U0_TRIUA	Lipoxygenase	PF00305: Lipoxygenase	IPR001024: PLAT/LH2 domain; IPR001246: Lipoxygenase, plant; IPR013819: Lipoxygenase, C-terminal; IPR020834: Lipoxygenase, conserved site; IPR027433: Lipoxygenase, domain 3	GO:0005515 MF: protein binding;GO:0016491 MF: oxidoreductase activity;GO:0016702 MF: oxidoreductase activity, acting on single donors with incorporation of molecular oxygen, incorporation of two atoms of oxygen;GO:0046872 MF: metal ion binding;GO:0055114 BP: oxidation-reduction process	G
HC	2A	744943578	751943578	QTL_2A_4	-	1	***	tr|M8A1U0|M8A1U0_TRIUA	Lipoxygenase	PF00305: Lipoxygenase	IPR001024: PLAT/LH2 domain; IPR001246: Lipoxygenase, plant; IPR013819: Lipoxygenase, C-terminal; IPR020834: Lipoxygenase, conserved site; IPR027433: Lipoxygenase, domain 3	GO:0005515 MF: protein binding;GO:0016491 MF: oxidoreductase activity;GO:0016702 MF: oxidoreductase activity, acting on single donors with incorporation of molecular oxygen, incorporation of two atoms of oxygen;GO:0046872 MF: metal ion binding;GO:0055114 BP: oxidation-reduction process	G
HC	2A	744943578	751943578	QTL_2A_4	-	1	***	tr|M8A1U0|M8A1U0_TRIUA	Lipoxygenase	PF00305: Lipoxygenase	IPR001024: PLAT/LH2 domain; IPR001246: Lipoxygenase, plant; IPR013819: Lipoxygenase, C-terminal; IPR020834: Lipoxygenase, conserved site; IPR027433: Lipoxygenase, domain 3	GO:0005515 MF: protein binding;GO:0016491 MF: oxidoreductase activity;GO:0016702 MF: oxidoreductase activity, acting on single donors with incorporation of molecular oxygen, incorporation of two atoms of oxygen;GO:0046872 MF: metal ion binding;GO:0055114 BP: oxidation-reduction process	G
HC	2A	744943578	751943578	QTL_2A_4	-	0	***	tr|M8A1U0|M8A1U0_TRIUA	Lipoxygenase	PF00305: Lipoxygenase	IPR001024: PLAT/LH2 domain; IPR001246: Lipoxygenase, plant; IPR013819: Lipoxygenase, C-terminal; IPR020834: Lipoxygenase, conserved site; IPR027433: Lipoxygenase, domain 3	GO:0005515 MF: protein binding;GO:0016491 MF: oxidoreductase activity;GO:0016702 MF: oxidoreductase activity, acting on single donors with incorporation of molecular oxygen, incorporation of two atoms of oxygen;GO:0046872 MF: metal ion binding;GO:0055114 BP: oxidation-reduction process	G
HC	2A	744943578	751943578	QTL_2A_4	-	0	***	tr|M8A1U0|M8A1U0_TRIUA	Lipoxygenase	PF00305: Lipoxygenase	IPR001024: PLAT/LH2 domain; IPR001246: Lipoxygenase, plant; IPR013819: Lipoxygenase, C-terminal; IPR020834: Lipoxygenase, conserved site; IPR027433: Lipoxygenase, domain 3	GO:0005515 MF: protein binding;GO:0016491 MF: oxidoreductase activity;GO:0016702 MF: oxidoreductase activity, acting on single donors with incorporation of molecular oxygen, incorporation of two atoms of oxygen;GO:0046872 MF: metal ion binding;GO:0055114 BP: oxidation-reduction process	G
HC	2A	744943578	751943578	QTL_2A_4	-	0	***	tr|M8A1U0|M8A1U0_TRIUA	Lipoxygenase	PF00305: Lipoxygenase	IPR001024: PLAT/LH2 domain; IPR001246: Lipoxygenase, plant; IPR013819: Lipoxygenase, C-terminal; IPR020834: Lipoxygenase, conserved site; IPR027433: Lipoxygenase, domain 3	GO:0005515 MF: protein binding;GO:0016491 MF: oxidoreductase activity;GO:0016702 MF: oxidoreductase activity, acting on single donors with incorporation of molecular oxygen, incorporation of two atoms of oxygen;GO:0046872 MF: metal ion binding;GO:0055114 BP: oxidation-reduction process	G
HC	2A	744943578	751943578	QTL_2A_4	-	0	***	tr|M8A1U0|M8A1U0_TRIUA	Lipoxygenase	PF00305: Lipoxygenase	IPR001024: PLAT/LH2 domain; IPR001246: Lipoxygenase, plant; IPR013819: Lipoxygenase, C-terminal; IPR020834: Lipoxygenase, conserved site; IPR027433: Lipoxygenase, domain 3	GO:0005515 MF: protein binding;GO:0016491 MF: oxidoreductase activity;GO:0016702 MF: oxidoreductase activity, acting on single donors with incorporation of molecular oxygen, incorporation of two atoms of oxygen;GO:0046872 MF: metal ion binding;GO:0055114 BP: oxidation-reduction process	G
HC	2A	744943578	751943578	QTL_2A_4	-	0	***	tr|M8A1U0|M8A1U0_TRIUA	Lipoxygenase	PF00305: Lipoxygenase	IPR001024: PLAT/LH2 domain; IPR001246: Lipoxygenase, plant; IPR013819: Lipoxygenase, C-terminal; IPR020834: Lipoxygenase, conserved site; IPR027433: Lipoxygenase, domain 3	GO:0005515 MF: protein binding;GO:0016491 MF: oxidoreductase activity;GO:0016702 MF: oxidoreductase activity, acting on single donors with incorporation of molecular oxygen, incorporation of two atoms of oxygen;GO:0046872 MF: metal ion binding;GO:0055114 BP: oxidation-reduction process	G
LC	2A	744943578	751943578	QTL_2A_4	-	1	--*	AT1G47510.4	inositol polyphosphate 5-phosphatase 11				G
LC	2A	744943578	751943578	QTL_2A_4	+	1	*-*	tr|O04807|O04807_PERFR	Omega-3 fatty acid desaturase				G
HC	2A	744943578	751943578	QTL_2A_4	-	1	--*	AT1G30450.4	cation-chloride co-transporter 1				G
HC	2A	744943578	751943578	QTL_2A_4	-	1	--*	sp|Q9HQG3|FLPA_HALSA	Fibrillarin-like rRNA/tRNA 2'-O-methyltransferase				G
LC	2A	744943578	751943578	QTL_2A_4	-	1	*-*	tr|A0A151QPK4|A0A151QPK4_CAJCA	LINE-1 reverse transcriptase isogeny	PF00078: Reverse transcriptase (RNA-dependent DNA polymerase)	IPR000477: Reverse transcriptase domain		TE
LC	2A	744943578	751943578	QTL_2A_4	-	0	*-*	tr|A0A151RC87|A0A151RC87_CAJCA	Transposon TX1 uncharacterized				TE
LC	2A	744943578	751943578	QTL_2A_4	-	1	--*	tr|D3JJE2|D3JJE2_TYPLA	NAD(P)H-quinone oxidoreductase subunit I, chloroplastic	PF14111: Domain of unknown function (DUF4283); PF14392: Zinc knuckle	IPR025558: Domain of unknown function DUF4283; IPR025836: Zinc knuckle CX2CX4HX4C		G
LC	2A	744943578	751943578	QTL_2A_4	-	1	--*	tr|V9H026|V9H026_ARATH	Reverse transcriptase		IPR005135: Endonuclease/exonuclease/phosphatase		TE
LC	2A	744943578	751943578	QTL_2A_4	-	1	*-*	tr|A0A059Q333|A0A059Q333_9POAL	Dynamin-related protein				G
HC	2A	744943578	751943578	QTL_2A_4	+	1	--*	sp|Q09555|DAF19_CAEEL	RFX-like transcription factor daf-19				G
LC	2A	744943578	751943578	QTL_2A_4	-	1	***	tr|A0A072VES6|A0A072VES6_MEDTR	Endonuclease/exonuclease/phosphatase family protein		IPR005135: Endonuclease/exonuclease/phosphatase		TE?
HC	2A	744943578	751943578	QTL_2A_4	+	1	***	tr|A0A061DY70|A0A061DY70_THECC	Mitochondrial transcription termination factor family protein	PF02536: mTERF	IPR003690: Transcription termination factor, mitochondrial/chloroplastic	GO:0003690 MF: double-stranded DNA binding;GO:0006355 BP: regulation of transcription, DNA-templated	G
HC	2A	744943578	751943578	QTL_2A_4	+	1	***	tr|A0A061DY70|A0A061DY70_THECC	Mitochondrial transcription termination factor family protein	PF02536: mTERF	IPR003690: Transcription termination factor, mitochondrial/chloroplastic	GO:0003690 MF: double-stranded DNA binding;GO:0006355 BP: regulation of transcription, DNA-templated	G
HC	2A	744943578	751943578	QTL_2A_4	-	1	***	tr|M8AU69|M8AU69_AEGTA	DNA polymerase I	PF01612: 3'-5' exonuclease; PF00476: DNA polymerase family A	IPR001098: DNA-directed DNA polymerase, family A, palm domain; IPR002298: DNA polymerase A; IPR002562: 3'-5' exonuclease domain; IPR012337: Ribonuclease H-like domain	GO:0003676 MF: nucleic acid binding;GO:0003677 MF: DNA binding;GO:0003887 MF: DNA-directed DNA polymerase activity;GO:0006139 BP: nucleobase-containing compound metabolic process;GO:0006260 BP: DNA replication;GO:0006261 BP: DNA-dependent DNA replication;GO:0008408 MF: 3'-5' exonuclease activity	G
HC	2A	744943578	751943578	QTL_2A_4	-	1	***	tr|M8AU69|M8AU69_AEGTA	DNA polymerase I	PF01612: 3'-5' exonuclease; PF00476: DNA polymerase family A	IPR001098: DNA-directed DNA polymerase, family A, palm domain; IPR002298: DNA polymerase A; IPR002562: 3'-5' exonuclease domain; IPR012337: Ribonuclease H-like domain	GO:0003676 MF: nucleic acid binding;GO:0003677 MF: DNA binding;GO:0003887 MF: DNA-directed DNA polymerase activity;GO:0006139 BP: nucleobase-containing compound metabolic process;GO:0006260 BP: DNA replication;GO:0006261 BP: DNA-dependent DNA replication;GO:0008408 MF: 3'-5' exonuclease activity	G
HC	2A	744943578	751943578	QTL_2A_4	-	1	***	tr|M8AU69|M8AU69_AEGTA	DNA polymerase I	PF01612: 3'-5' exonuclease; PF00476: DNA polymerase family A	IPR001098: DNA-directed DNA polymerase, family A, palm domain; IPR002298: DNA polymerase A; IPR002562: 3'-5' exonuclease domain; IPR012337: Ribonuclease H-like domain	GO:0003676 MF: nucleic acid binding;GO:0003677 MF: DNA binding;GO:0003887 MF: DNA-directed DNA polymerase activity;GO:0006139 BP: nucleobase-containing compound metabolic process;GO:0006260 BP: DNA replication;GO:0006261 BP: DNA-dependent DNA replication;GO:0008408 MF: 3'-5' exonuclease activity	G
HC	2A	744943578	751943578	QTL_2A_4	-	1	***	tr|M8AU69|M8AU69_AEGTA	DNA polymerase I	PF01612: 3'-5' exonuclease; PF00476: DNA polymerase family A	IPR001098: DNA-directed DNA polymerase, family A, palm domain; IPR002298: DNA polymerase A; IPR002562: 3'-5' exonuclease domain; IPR012337: Ribonuclease H-like domain	GO:0003676 MF: nucleic acid binding;GO:0003677 MF: DNA binding;GO:0003887 MF: DNA-directed DNA polymerase activity;GO:0006139 BP: nucleobase-containing compound metabolic process;GO:0006260 BP: DNA replication;GO:0006261 BP: DNA-dependent DNA replication;GO:0008408 MF: 3'-5' exonuclease activity	G
HC	2A	744943578	751943578	QTL_2A_4	-	1	***	tr|M8AU69|M8AU69_AEGTA	DNA polymerase I	PF01612: 3'-5' exonuclease; PF00476: DNA polymerase family A	IPR001098: DNA-directed DNA polymerase, family A, palm domain; IPR002298: DNA polymerase A; IPR002562: 3'-5' exonuclease domain; IPR012337: Ribonuclease H-like domain	GO:0003676 MF: nucleic acid binding;GO:0003677 MF: DNA binding;GO:0003887 MF: DNA-directed DNA polymerase activity;GO:0006139 BP: nucleobase-containing compound metabolic process;GO:0006260 BP: DNA replication;GO:0006261 BP: DNA-dependent DNA replication;GO:0008408 MF: 3'-5' exonuclease activity	G
HC	2A	744943578	751943578	QTL_2A_4	-	1	***	tr|M8AU69|M8AU69_AEGTA	DNA polymerase I	PF01612: 3'-5' exonuclease; PF00476: DNA polymerase family A	IPR001098: DNA-directed DNA polymerase, family A, palm domain; IPR002298: DNA polymerase A; IPR002562: 3'-5' exonuclease domain; IPR012337: Ribonuclease H-like domain	GO:0003676 MF: nucleic acid binding;GO:0003677 MF: DNA binding;GO:0003887 MF: DNA-directed DNA polymerase activity;GO:0006139 BP: nucleobase-containing compound metabolic process;GO:0006260 BP: DNA replication;GO:0006261 BP: DNA-dependent DNA replication;GO:0008408 MF: 3'-5' exonuclease activity	G
HC	2A	744943578	751943578	QTL_2A_4	-	1	***	tr|M8AU69|M8AU69_AEGTA	DNA polymerase I	PF01612: 3'-5' exonuclease; PF00476: DNA polymerase family A	IPR001098: DNA-directed DNA polymerase, family A, palm domain; IPR002298: DNA polymerase A; IPR002562: 3'-5' exonuclease domain; IPR012337: Ribonuclease H-like domain	GO:0003676 MF: nucleic acid binding;GO:0003677 MF: DNA binding;GO:0003887 MF: DNA-directed DNA polymerase activity;GO:0006139 BP: nucleobase-containing compound metabolic process;GO:0006260 BP: DNA replication;GO:0006261 BP: DNA-dependent DNA replication;GO:0008408 MF: 3'-5' exonuclease activity	G
HC	2A	744943578	751943578	QTL_2A_4	-	1	***	tr|A0A072V8D7|A0A072V8D7_MEDTR	Epidermal patterning factor	PF17181: Epidermal patterning factor proteins			G
HC	2A	744943578	751943578	QTL_2A_4	+	1	***	tr|A0A0A8JXV7|A0A0A8JXV7_ORYSI	Pentatricopeptide repeat-containing protein	PF01535: PPR repeat; PF12854: PPR repeat; PF13041: PPR repeat family	IPR002885: Pentatricopeptide repeat; IPR011990: Tetratricopeptide-like helical domain	GO:0005515 MF: protein binding	G
LC	2A	744943578	751943578	QTL_2A_4	+	1	***	tr|A0A072U7W0|A0A072U7W0_MEDTR	Endonuclease/exonuclease/phosphatase family protein		IPR005135: Endonuclease/exonuclease/phosphatase		TE?
LC	2A	744943578	751943578	QTL_2A_4	+	1	*-*	tr|A2Q338|A2Q338_MEDTR	RNA-directed DNA polymerase (Reverse transcriptase)				TE
HC	2A	744943578	751943578	QTL_2A_4	-	1	***	AT1G58330.1	transcription factor-like protein	PF00170: bZIP transcription factor; PF14144: Seed dormancy control	IPR004827: Basic-leucine zipper domain; IPR025422: Transcription factor TGA like domain	GO:0003700 MF: transcription factor activity, sequence-specific DNA binding;GO:0006351 BP: transcription, DNA-templated;GO:0006355 BP: regulation of transcription, DNA-templated;GO:0043565 MF: sequence-specific DNA binding	G
HC	2A	744943578	751943578	QTL_2A_4	-	1	***	AT1G58330.1	transcription factor-like protein	PF00170: bZIP transcription factor; PF14144: Seed dormancy control	IPR004827: Basic-leucine zipper domain; IPR025422: Transcription factor TGA like domain	GO:0003700 MF: transcription factor activity, sequence-specific DNA binding;GO:0006351 BP: transcription, DNA-templated;GO:0006355 BP: regulation of transcription, DNA-templated;GO:0043565 MF: sequence-specific DNA binding	G
HC	2A	744943578	751943578	QTL_2A_4	-	1	***	AT1G58330.1	transcription factor-like protein	PF00170: bZIP transcription factor; PF14144: Seed dormancy control	IPR004827: Basic-leucine zipper domain; IPR025422: Transcription factor TGA like domain	GO:0003700 MF: transcription factor activity, sequence-specific DNA binding;GO:0006351 BP: transcription, DNA-templated;GO:0006355 BP: regulation of transcription, DNA-templated;GO:0043565 MF: sequence-specific DNA binding	G
HC	2A	744943578	751943578	QTL_2A_4	-	1	***	AT1G58330.1	transcription factor-like protein	PF00170: bZIP transcription factor; PF14144: Seed dormancy control	IPR004827: Basic-leucine zipper domain; IPR025422: Transcription factor TGA like domain	GO:0003700 MF: transcription factor activity, sequence-specific DNA binding;GO:0006351 BP: transcription, DNA-templated;GO:0006355 BP: regulation of transcription, DNA-templated;GO:0043565 MF: sequence-specific DNA binding	G
HC	2A	744943578	751943578	QTL_2A_4	+	1	***	tr|A0A0K9PH39|A0A0K9PH39_ZOSMR	RNA binding protein	PF00076: RNA recognition motif. (a.k.a. RRM, RBD, or RNP domain)	IPR000504: RNA recognition motif domain	GO:0003676 MF: nucleic acid binding	G
HC	2A	744943578	751943578	QTL_2A_4	+	1	--*	AT4G24610.3	pesticidal crystal cry8Ba protein				G
LC	2A	744943578	751943578	QTL_2A_4	+	1	--*	tr|F4I5Q9|F4I5Q9_ARATH	Polynucleotidyl transferase, ribonuclease H-like superfamily protein	PF13456: Reverse transcriptase-like	IPR012337: Ribonuclease H-like domain	GO:0003676 MF: nucleic acid binding	TE
LC	2A	744943578	751943578	QTL_2A_4	+	1	--*	AT3G24255.3	RNA-directed DNA polymerase (reverse transcriptase)-related family protein	PF13966: zinc-binding in reverse transcriptase	IPR026960: Reverse transcriptase zinc-binding domain		TE
HC	2A	744943578	751943578	QTL_2A_4	+	1	***	tr|Q337G7|Q337G7_ORYSJ	Epoxide hydrolase, putative, expressed		IPR029058: Alpha/Beta hydrolase fold		G
HC	2A	744943578	751943578	QTL_2A_4	+	1	***	tr|A0A199V5T5|A0A199V5T5_ANACO	MICOS complex subunit MIC60	PF09731: Mitochondrial inner membrane protein	IPR019133: Mitochondrial inner membrane protein Mitofilin		G
HC	2A	744943578	751943578	QTL_2A_4	+	0	***	tr|A0A199V5T5|A0A199V5T5_ANACO	MICOS complex subunit MIC60	PF09731: Mitochondrial inner membrane protein	IPR019133: Mitochondrial inner membrane protein Mitofilin		G
HC	2A	744943578	751943578	QTL_2A_4	-	0	*-*	AT3G53690.1	RING/U-box superfamily protein	PF13445: RING-type zinc-finger	IPR001841: Zinc finger, RING-type; IPR013083: Zinc finger, RING/FYVE/PHD-type; IPR017907: Zinc finger, RING-type, conserved site; IPR027370: RING-type zinc-finger, LisH dimerisation motif	GO:0005515 MF: protein binding;GO:0008270 MF: zinc ion binding	G
HC	2A	744943578	751943578	QTL_2A_4	-	0	*-*	AT3G53690.1	RING/U-box superfamily protein	PF13445: RING-type zinc-finger	IPR001841: Zinc finger, RING-type; IPR013083: Zinc finger, RING/FYVE/PHD-type; IPR017907: Zinc finger, RING-type, conserved site; IPR027370: RING-type zinc-finger, LisH dimerisation motif	GO:0005515 MF: protein binding;GO:0008270 MF: zinc ion binding	G
HC	2A	744943578	751943578	QTL_2A_4	-	1	*-*	AT3G53690.1	RING/U-box superfamily protein	PF13445: RING-type zinc-finger	IPR001841: Zinc finger, RING-type; IPR013083: Zinc finger, RING/FYVE/PHD-type; IPR017907: Zinc finger, RING-type, conserved site; IPR027370: RING-type zinc-finger, LisH dimerisation motif	GO:0005515 MF: protein binding;GO:0008270 MF: zinc ion binding	G
HC	2A	744943578	751943578	QTL_2A_4	-	1	*-*	AT3G53690.1	RING/U-box superfamily protein	PF13445: RING-type zinc-finger	IPR001841: Zinc finger, RING-type; IPR013083: Zinc finger, RING/FYVE/PHD-type; IPR017907: Zinc finger, RING-type, conserved site; IPR027370: RING-type zinc-finger, LisH dimerisation motif	GO:0005515 MF: protein binding;GO:0008270 MF: zinc ion binding	G
LC	2A	744943578	751943578	QTL_2A_4	+	1	*-*	tr|A7UMA9|A7UMA9_WHEAT	CsAtPR5				G
HC	2A	744943578	751943578	QTL_2A_4	-	1	***	tr|A0A1E5ULA2|A0A1E5ULA2_9POAL	BTB/POZ domain-containing protein	PF00651: BTB/POZ domain; PF03000: NPH3 family	IPR000210: BTB/POZ domain; IPR011333: SKP1/BTB/POZ domain; IPR027356: NPH3 domain	GO:0005515 MF: protein binding	G
HC	2A	744943578	751943578	QTL_2A_4	-	1	***	tr|Q1PEQ5|Q1PEQ5_ARATH	RING/U-box superfamily protein	PF01485: IBR domain, a half RING-finger domain	IPR001841: Zinc finger, RING-type; IPR002867: IBR domain; IPR013083: Zinc finger, RING/FYVE/PHD-type; IPR017907: Zinc finger, RING-type, conserved site	GO:0005515 MF: protein binding;GO:0008270 MF: zinc ion binding	G
HC	2A	744943578	751943578	QTL_2A_4	-	1	***	tr|Q1PEQ5|Q1PEQ5_ARATH	RING/U-box superfamily protein	PF01485: IBR domain, a half RING-finger domain	IPR001841: Zinc finger, RING-type; IPR002867: IBR domain; IPR013083: Zinc finger, RING/FYVE/PHD-type; IPR017907: Zinc finger, RING-type, conserved site	GO:0005515 MF: protein binding;GO:0008270 MF: zinc ion binding	G
LC	2A	744943578	751943578	QTL_2A_4	-	1	*-*	tr|A0A151RHW9|A0A151RHW9_CAJCA	Protein FAR1-RELATED SEQUENCE 3	PF04434: SWIM zinc finger	IPR006564: Zinc finger, PMZ-type; IPR007527: Zinc finger, SWIM-type	GO:0008270 MF: zinc ion binding	TE
LC	2A	744943578	751943578	QTL_2A_4	-	1	*-*	tr|A0A0B2QZL7|A0A0B2QZL7_GLYSO	Protein FAR1-RELATED SEQUENCE 5	PF10551: MULE transposase domain	IPR018289: MULE transposase domain		TE
LC	2A	744943578	751943578	QTL_2A_4	-	1	***	tr|B6SUE3|B6SUE3_MAIZE	TCP family transcription factor containing protein	PF03634: TCP family transcription factor	IPR005333: Transcription factor, TCP; IPR017887: Transcription factor TCP subgroup		G
HC	2A	744943578	751943578	QTL_2A_4	-	1	***	tr|A0A1D1YNH6|A0A1D1YNH6_9ARAE	Nuclease S1	PF02265: S1/P1 Nuclease	IPR003154: S1/P1 nuclease; IPR008947: Phospholipase C/P1 nuclease domain	GO:0003676 MF: nucleic acid binding;GO:0004519 MF: endonuclease activity;GO:0006308 BP: DNA catabolic process;GO:0016788 MF: hydrolase activity, acting on ester bonds	G
HC	2A	744943578	751943578	QTL_2A_4	-	1	***	tr|A0A1D1YNH6|A0A1D1YNH6_9ARAE	Nuclease S1	PF02265: S1/P1 Nuclease	IPR003154: S1/P1 nuclease; IPR008947: Phospholipase C/P1 nuclease domain	GO:0003676 MF: nucleic acid binding;GO:0004519 MF: endonuclease activity;GO:0006308 BP: DNA catabolic process;GO:0016788 MF: hydrolase activity, acting on ester bonds	G
HC	2A	744943578	751943578	QTL_2A_4	-	1	***	tr|A0A1D1YNH6|A0A1D1YNH6_9ARAE	Nuclease S1	PF02265: S1/P1 Nuclease	IPR003154: S1/P1 nuclease; IPR008947: Phospholipase C/P1 nuclease domain	GO:0003676 MF: nucleic acid binding;GO:0004519 MF: endonuclease activity;GO:0006308 BP: DNA catabolic process;GO:0016788 MF: hydrolase activity, acting on ester bonds	G
HC	2A	744943578	751943578	QTL_2A_4	-	1	***	tr|A0A1D1YNH6|A0A1D1YNH6_9ARAE	Nuclease S1	PF02265: S1/P1 Nuclease	IPR003154: S1/P1 nuclease; IPR008947: Phospholipase C/P1 nuclease domain	GO:0003676 MF: nucleic acid binding;GO:0004519 MF: endonuclease activity;GO:0006308 BP: DNA catabolic process;GO:0016788 MF: hydrolase activity, acting on ester bonds	G
HC	2A	744943578	751943578	QTL_2A_4	+	1	***	tr|G7LD70|G7LD70_MEDTR	Cystathionine beta-lyase family protein	PF06838: Methionine gamma-lyase	IPR009651: Putative methionine gamma-lyase; IPR015421: Pyridoxal phosphate-dependent transferase, major region, subdomain 1; IPR015424: Pyridoxal phosphate-dependent transferase	GO:0003824 MF: catalytic activity	G
HC	2A	744943578	751943578	QTL_2A_4	+	1	*-*	tr|C1KAE3|C1KAE3_HORVU	NBS-LRR disease resistance protein-like protein	PF00931: NB-ARC domain	IPR002182: NB-ARC; IPR027417: P-loop containing nucleoside triphosphate hydrolase	GO:0043531 MF: ADP binding	G
LC	2A	744943578	751943578	QTL_2A_4	+	1	--*	sp|Q8GED7|CLPS_STRNR	Cyclo(L-leucyl-L-phenylalanyl) synthase	PF06838: Methionine gamma-lyase	IPR009651: Putative methionine gamma-lyase; IPR015421: Pyridoxal phosphate-dependent transferase, major region, subdomain 1; IPR015424: Pyridoxal phosphate-dependent transferase	GO:0003824 MF: catalytic activity	G
HC	2A	744943578	751943578	QTL_2A_4	+	1	***	tr|C1KAE3|C1KAE3_HORVU	NBS-LRR disease resistance protein-like protein	PF00931: NB-ARC domain	IPR002182: NB-ARC; IPR011991: Winged helix-turn-helix DNA-binding domain; IPR027417: P-loop containing nucleoside triphosphate hydrolase; IPR032675: Leucine-rich repeat domain, L domain-like	GO:0043531 MF: ADP binding	G
HC	2A	744943578	751943578	QTL_2A_4	+	1	*-*	tr|A0A061E2Z9|A0A061E2Z9_THECC	Micronuclear linker histone polyprotein-like protein				G
HC	2A	744943578	751943578	QTL_2A_4	-	1	***	tr|A0A1D5T845|A0A1D5T845_WHEAT	Hexosyltransferase	PF01501: Glycosyl transferase family 8	IPR002495: Glycosyl transferase, family 8; IPR029044: Nucleotide-diphospho-sugar transferases	GO:0016757 MF: transferase activity, transferring glycosyl groups	G
LC	2A	744943578	751943578	QTL_2A_4	-	1	*-*	tr|Q9XHQ2|Q9XHQ2_HORVU	Receptor-like kinase		IPR011009: Protein kinase-like domain		G
LC	2A	744943578	751943578	QTL_2A_4	+	1	*-*	tr|Q9LL57|Q9LL57_ORYSA	Receptor-like kinase				G
LC	2A	744943578	751943578	QTL_2A_4	+	1	***	tr|O49206|O49206_ORYSA	Receptor-like protein kinase	PF07714: Protein tyrosine kinase	IPR000719: Protein kinase domain; IPR001245: Serine-threonine/tyrosine-protein kinase, catalytic domain; IPR011009: Protein kinase-like domain; IPR017441: Protein kinase, ATP binding site	GO:0004672 MF: protein kinase activity;GO:0005524 MF: ATP binding;GO:0006468 BP: protein phosphorylation	G
LC	2A	744943578	751943578	QTL_2A_4	+	1	***	tr|O49206|O49206_ORYSA	Receptor-like protein kinase	PF07714: Protein tyrosine kinase	IPR000719: Protein kinase domain; IPR001245: Serine-threonine/tyrosine-protein kinase, catalytic domain; IPR011009: Protein kinase-like domain; IPR017441: Protein kinase, ATP binding site	GO:0004672 MF: protein kinase activity;GO:0005524 MF: ATP binding;GO:0006468 BP: protein phosphorylation	G
LC	2A	744943578	751943578	QTL_2A_4	+	1	***	tr|O49206|O49206_ORYSA	Receptor-like protein kinase	PF07714: Protein tyrosine kinase	IPR000719: Protein kinase domain; IPR001245: Serine-threonine/tyrosine-protein kinase, catalytic domain; IPR011009: Protein kinase-like domain; IPR017441: Protein kinase, ATP binding site	GO:0004672 MF: protein kinase activity;GO:0005524 MF: ATP binding;GO:0006468 BP: protein phosphorylation	G
HC	2A	744943578	751943578	QTL_2A_4	+	0	***	tr|Q6WGP9|Q6WGP9_WHEAT	Chalcone synthase	PF00195: Chalcone and stilbene synthases, N-terminal domain; PF02797: Chalcone and stilbene synthases, C-terminal domain	IPR001099: Chalcone/stilbene synthase, N-terminal; IPR011141: Polyketide synthase, type III; IPR012328: Chalcone/stilbene synthase, C-terminal; IPR016039: Thiolase-like; IPR018088: Chalcone/stilbene synthase, active site	GO:0003824 MF: catalytic activity;GO:0008152 BP: metabolic process;GO:0009058 BP: biosynthetic process;GO:0016746 MF: transferase activity, transferring acyl groups;GO:0016747 MF: transferase activity, transferring acyl groups other than amino-acyl groups	G
HC	2A	744943578	751943578	QTL_2A_4	+	0	***	tr|Q6WGP9|Q6WGP9_WHEAT	Chalcone synthase	PF00195: Chalcone and stilbene synthases, N-terminal domain; PF02797: Chalcone and stilbene synthases, C-terminal domain	IPR001099: Chalcone/stilbene synthase, N-terminal; IPR011141: Polyketide synthase, type III; IPR012328: Chalcone/stilbene synthase, C-terminal; IPR016039: Thiolase-like; IPR018088: Chalcone/stilbene synthase, active site	GO:0003824 MF: catalytic activity;GO:0008152 BP: metabolic process;GO:0009058 BP: biosynthetic process;GO:0016746 MF: transferase activity, transferring acyl groups;GO:0016747 MF: transferase activity, transferring acyl groups other than amino-acyl groups	G
HC	2A	744943578	751943578	QTL_2A_4	+	0	***	tr|Q6WGP9|Q6WGP9_WHEAT	Chalcone synthase	PF00195: Chalcone and stilbene synthases, N-terminal domain; PF02797: Chalcone and stilbene synthases, C-terminal domain	IPR001099: Chalcone/stilbene synthase, N-terminal; IPR011141: Polyketide synthase, type III; IPR012328: Chalcone/stilbene synthase, C-terminal; IPR016039: Thiolase-like; IPR018088: Chalcone/stilbene synthase, active site	GO:0003824 MF: catalytic activity;GO:0008152 BP: metabolic process;GO:0009058 BP: biosynthetic process;GO:0016746 MF: transferase activity, transferring acyl groups;GO:0016747 MF: transferase activity, transferring acyl groups other than amino-acyl groups	G
HC	2A	744943578	751943578	QTL_2A_4	+	0	***	tr|Q6WGP9|Q6WGP9_WHEAT	Chalcone synthase	PF00195: Chalcone and stilbene synthases, N-terminal domain; PF02797: Chalcone and stilbene synthases, C-terminal domain	IPR001099: Chalcone/stilbene synthase, N-terminal; IPR011141: Polyketide synthase, type III; IPR012328: Chalcone/stilbene synthase, C-terminal; IPR016039: Thiolase-like; IPR018088: Chalcone/stilbene synthase, active site	GO:0003824 MF: catalytic activity;GO:0008152 BP: metabolic process;GO:0009058 BP: biosynthetic process;GO:0016746 MF: transferase activity, transferring acyl groups;GO:0016747 MF: transferase activity, transferring acyl groups other than amino-acyl groups	G
HC	2A	744943578	751943578	QTL_2A_4	+	0	***	tr|Q6WGP9|Q6WGP9_WHEAT	Chalcone synthase	PF00195: Chalcone and stilbene synthases, N-terminal domain; PF02797: Chalcone and stilbene synthases, C-terminal domain	IPR001099: Chalcone/stilbene synthase, N-terminal; IPR011141: Polyketide synthase, type III; IPR012328: Chalcone/stilbene synthase, C-terminal; IPR016039: Thiolase-like; IPR018088: Chalcone/stilbene synthase, active site	GO:0003824 MF: catalytic activity;GO:0008152 BP: metabolic process;GO:0009058 BP: biosynthetic process;GO:0016746 MF: transferase activity, transferring acyl groups;GO:0016747 MF: transferase activity, transferring acyl groups other than amino-acyl groups	G
HC	2A	744943578	751943578	QTL_2A_4	+	1	***	tr|Q6WGP9|Q6WGP9_WHEAT	Chalcone synthase	PF00195: Chalcone and stilbene synthases, N-terminal domain; PF02797: Chalcone and stilbene synthases, C-terminal domain	IPR001099: Chalcone/stilbene synthase, N-terminal; IPR011141: Polyketide synthase, type III; IPR012328: Chalcone/stilbene synthase, C-terminal; IPR016039: Thiolase-like; IPR018088: Chalcone/stilbene synthase, active site	GO:0003824 MF: catalytic activity;GO:0008152 BP: metabolic process;GO:0009058 BP: biosynthetic process;GO:0016746 MF: transferase activity, transferring acyl groups;GO:0016747 MF: transferase activity, transferring acyl groups other than amino-acyl groups	G
HC	2A	744943578	751943578	QTL_2A_4	+	1	***	tr|Q6WGP9|Q6WGP9_WHEAT	Chalcone synthase	PF00195: Chalcone and stilbene synthases, N-terminal domain; PF02797: Chalcone and stilbene synthases, C-terminal domain	IPR001099: Chalcone/stilbene synthase, N-terminal; IPR011141: Polyketide synthase, type III; IPR012328: Chalcone/stilbene synthase, C-terminal; IPR016039: Thiolase-like; IPR018088: Chalcone/stilbene synthase, active site	GO:0003824 MF: catalytic activity;GO:0008152 BP: metabolic process;GO:0009058 BP: biosynthetic process;GO:0016746 MF: transferase activity, transferring acyl groups;GO:0016747 MF: transferase activity, transferring acyl groups other than amino-acyl groups	G
HC	2A	744943578	751943578	QTL_2A_4	+	1	***	tr|Q6WGP9|Q6WGP9_WHEAT	Chalcone synthase	PF00195: Chalcone and stilbene synthases, N-terminal domain; PF02797: Chalcone and stilbene synthases, C-terminal domain	IPR001099: Chalcone/stilbene synthase, N-terminal; IPR011141: Polyketide synthase, type III; IPR012328: Chalcone/stilbene synthase, C-terminal; IPR016039: Thiolase-like; IPR018088: Chalcone/stilbene synthase, active site	GO:0003824 MF: catalytic activity;GO:0008152 BP: metabolic process;GO:0009058 BP: biosynthetic process;GO:0016746 MF: transferase activity, transferring acyl groups;GO:0016747 MF: transferase activity, transferring acyl groups other than amino-acyl groups	G
HC	2A	744943578	751943578	QTL_2A_4	+	1	***	tr|Q6WGP9|Q6WGP9_WHEAT	Chalcone synthase	PF00195: Chalcone and stilbene synthases, N-terminal domain; PF02797: Chalcone and stilbene synthases, C-terminal domain	IPR001099: Chalcone/stilbene synthase, N-terminal; IPR011141: Polyketide synthase, type III; IPR012328: Chalcone/stilbene synthase, C-terminal; IPR016039: Thiolase-like; IPR018088: Chalcone/stilbene synthase, active site	GO:0003824 MF: catalytic activity;GO:0008152 BP: metabolic process;GO:0009058 BP: biosynthetic process;GO:0016746 MF: transferase activity, transferring acyl groups;GO:0016747 MF: transferase activity, transferring acyl groups other than amino-acyl groups	G
HC	2A	744943578	751943578	QTL_2A_4	+	1	***	tr|Q6WGP9|Q6WGP9_WHEAT	Chalcone synthase	PF00195: Chalcone and stilbene synthases, N-terminal domain; PF02797: Chalcone and stilbene synthases, C-terminal domain	IPR001099: Chalcone/stilbene synthase, N-terminal; IPR011141: Polyketide synthase, type III; IPR012328: Chalcone/stilbene synthase, C-terminal; IPR016039: Thiolase-like; IPR018088: Chalcone/stilbene synthase, active site	GO:0003824 MF: catalytic activity;GO:0008152 BP: metabolic process;GO:0009058 BP: biosynthetic process;GO:0016746 MF: transferase activity, transferring acyl groups;GO:0016747 MF: transferase activity, transferring acyl groups other than amino-acyl groups	G
HC	2A	744943578	751943578	QTL_2A_4	-	1	***	tr|Q9LL53|Q9LL53_ORYSA	Receptor-like kinase	PF13947: Wall-associated receptor kinase galacturonan-binding; PF00069: Protein kinase domain	IPR000719: Protein kinase domain; IPR008271: Serine/threonine-protein kinase, active site; IPR011009: Protein kinase-like domain; IPR017441: Protein kinase, ATP binding site; IPR025287: Wall-associated receptor kinase, galacturonan-binding domain	GO:0004672 MF: protein kinase activity;GO:0005524 MF: ATP binding;GO:0006468 BP: protein phosphorylation;GO:0030247 MF: polysaccharide binding	G
HC	2A	744943578	751943578	QTL_2A_4	-	1	***	tr|Q9LL53|Q9LL53_ORYSA	Receptor-like kinase	PF13947: Wall-associated receptor kinase galacturonan-binding; PF00069: Protein kinase domain	IPR000719: Protein kinase domain; IPR008271: Serine/threonine-protein kinase, active site; IPR011009: Protein kinase-like domain; IPR017441: Protein kinase, ATP binding site; IPR025287: Wall-associated receptor kinase, galacturonan-binding domain	GO:0004672 MF: protein kinase activity;GO:0005524 MF: ATP binding;GO:0006468 BP: protein phosphorylation;GO:0030247 MF: polysaccharide binding	G
HC	2A	744943578	751943578	QTL_2A_4	-	1	***	tr|Q9LL53|Q9LL53_ORYSA	Receptor-like kinase	PF13947: Wall-associated receptor kinase galacturonan-binding; PF00069: Protein kinase domain	IPR000719: Protein kinase domain; IPR008271: Serine/threonine-protein kinase, active site; IPR011009: Protein kinase-like domain; IPR017441: Protein kinase, ATP binding site; IPR025287: Wall-associated receptor kinase, galacturonan-binding domain	GO:0004672 MF: protein kinase activity;GO:0005524 MF: ATP binding;GO:0006468 BP: protein phosphorylation;GO:0030247 MF: polysaccharide binding	G
HC	2A	744943578	751943578	QTL_2A_4	-	1	***	tr|Q9LL53|Q9LL53_ORYSA	Receptor-like kinase	PF13947: Wall-associated receptor kinase galacturonan-binding; PF00069: Protein kinase domain	IPR000719: Protein kinase domain; IPR008271: Serine/threonine-protein kinase, active site; IPR011009: Protein kinase-like domain; IPR017441: Protein kinase, ATP binding site; IPR025287: Wall-associated receptor kinase, galacturonan-binding domain	GO:0004672 MF: protein kinase activity;GO:0005524 MF: ATP binding;GO:0006468 BP: protein phosphorylation;GO:0030247 MF: polysaccharide binding	G
HC	2A	744943578	751943578	QTL_2A_4	-	1	--*	sp|Q9P2D1|CHD7_HUMAN	Chromodomain-helicase-DNA-binding protein 7				TE?
HC	2A	744943578	751943578	QTL_2A_4	+	1	*-*	tr|Q9M576|Q9M576_ORYSA	Receptor-like protein kinase	PF07714: Protein tyrosine kinase	IPR000719: Protein kinase domain; IPR001245: Serine-threonine/tyrosine-protein kinase, catalytic domain; IPR011009: Protein kinase-like domain	GO:0004672 MF: protein kinase activity;GO:0005524 MF: ATP binding;GO:0006468 BP: protein phosphorylation	G
HC	2A	744943578	751943578	QTL_2A_4	+	1	*-*	tr|Q9M576|Q9M576_ORYSA	Receptor-like protein kinase	PF07714: Protein tyrosine kinase	IPR000719: Protein kinase domain; IPR001245: Serine-threonine/tyrosine-protein kinase, catalytic domain; IPR011009: Protein kinase-like domain	GO:0004672 MF: protein kinase activity;GO:0005524 MF: ATP binding;GO:0006468 BP: protein phosphorylation	G
HC	2A	744943578	751943578	QTL_2A_4	+	1	*-*	tr|Q9M576|Q9M576_ORYSA	Receptor-like protein kinase	PF07714: Protein tyrosine kinase	IPR000719: Protein kinase domain; IPR001245: Serine-threonine/tyrosine-protein kinase, catalytic domain; IPR011009: Protein kinase-like domain	GO:0004672 MF: protein kinase activity;GO:0005524 MF: ATP binding;GO:0006468 BP: protein phosphorylation	G
HC	2A	744943578	751943578	QTL_2A_4	+	1	***	tr|B6UEX0|B6UEX0_MAIZE	3-oxoacyl-reductase	PF00106: short chain dehydrogenase	IPR002347: Short-chain dehydrogenase/reductase SDR; IPR016040: NAD(P)-binding domain; IPR020904: Short-chain dehydrogenase/reductase, conserved site	GO:0016491 MF: oxidoreductase activity	G
LC	2A	744943578	751943578	QTL_2A_4	-	1	--*	AT2G23140.1	RING/U-box superfamily protein with ARM repeat domain-containing protein				G
LC	2A	744943578	751943578	QTL_2A_4	-	1	*-*	tr|B9GM49|B9GM49_POPTR	Elongation defective 1 family protein				G
HC	2A	744943578	751943578	QTL_2A_4	+	1	--*	tr|A0A1E5WDD7|A0A1E5WDD7_9POAL	Antimicrobial peptide	PF14861: Plant antimicrobial peptide	IPR029227: Plant antimicrobial peptide	GO:0050832 BP: defense response to fungus	G
LC	2A	744943578	751943578	QTL_2A_4	+	1	*-*	tr|B9RF97|B9RF97_RICCO	Serine protease htra2, putative	PF13365: Trypsin-like peptidase domain	IPR001478: PDZ domain; IPR009003: Peptidase S1, PA clan	GO:0005515 MF: protein binding	G
LC	2A	744943578	751943578	QTL_2A_4	+	1	*-*	tr|B9RF97|B9RF97_RICCO	Serine protease htra2, putative	PF13180: PDZ domain	IPR001478: PDZ domain; IPR009003: Peptidase S1, PA clan	GO:0005515 MF: protein binding	G
LC	2A	744943578	751943578	QTL_2A_4	-	1	--*	AT5G45570.2	Ulp1 protease family protein				G
LC	2A	744943578	751943578	QTL_2A_4	-	1	--*	sp|B8MNF2|FEN1_TALSN	Flap endonuclease 1	PF13456: Reverse transcriptase-like	IPR012337: Ribonuclease H-like domain	GO:0003676 MF: nucleic acid binding	TE?
HC	2A	744943578	751943578	QTL_2A_4	+	1	*-*	tr|M7ZAP4|M7ZAP4_TRIUA	Heterogeneous nuclear ribonucleoprotein U-like protein 1				G
HC	2A	744943578	751943578	QTL_2A_4	-	1	--*	tr|A0A1E5WDD7|A0A1E5WDD7_9POAL	Antimicrobial peptide	PF14861: Plant antimicrobial peptide	IPR029227: Plant antimicrobial peptide	GO:0050832 BP: defense response to fungus	G
LC	2A	744943578	751943578	QTL_2A_4	+	1	*-*	tr|A0A072UBL3|A0A072UBL3_MEDTR	Cysteine-rich receptor-kinase-like protein	PF01657: Salt stress response/antifungal	IPR002902: Gnk2-homologous domain		G
LC	2A	744943578	751943578	QTL_2A_4	+	1	***	tr|G8A106|G8A106_MEDTR	Receptor-like kinase	PF07714: Protein tyrosine kinase	IPR000719: Protein kinase domain; IPR001245: Serine-threonine/tyrosine-protein kinase, catalytic domain; IPR008271: Serine/threonine-protein kinase, active site; IPR011009: Protein kinase-like domain	GO:0004672 MF: protein kinase activity;GO:0005524 MF: ATP binding;GO:0006468 BP: protein phosphorylation	G
LC	2A	744943578	751943578	QTL_2A_4	+	1	***	tr|G8A106|G8A106_MEDTR	Receptor-like kinase	PF07714: Protein tyrosine kinase	IPR000719: Protein kinase domain; IPR001245: Serine-threonine/tyrosine-protein kinase, catalytic domain; IPR008271: Serine/threonine-protein kinase, active site; IPR011009: Protein kinase-like domain	GO:0004672 MF: protein kinase activity;GO:0005524 MF: ATP binding;GO:0006468 BP: protein phosphorylation	G
LC	2A	744943578	751943578	QTL_2A_4	+	1	***	tr|G8A106|G8A106_MEDTR	Receptor-like kinase	PF07714: Protein tyrosine kinase	IPR000719: Protein kinase domain; IPR001245: Serine-threonine/tyrosine-protein kinase, catalytic domain; IPR008271: Serine/threonine-protein kinase, active site; IPR011009: Protein kinase-like domain	GO:0004672 MF: protein kinase activity;GO:0005524 MF: ATP binding;GO:0006468 BP: protein phosphorylation	G
HC	2A	744943578	751943578	QTL_2A_4	+	1	--*	sp|Q5X0E6|UVRB_LEGPL	UvrABC system protein B				G
LC	2A	744943578	751943578	QTL_2A_4	+	1	--*	tr|A0A072V1G8|A0A072V1G8_MEDTR	Leucine-rich receptor-like kinase family protein				G
HC	2A	744943578	751943578	QTL_2A_4	+	1	***	tr|M7ZAP4|M7ZAP4_TRIUA	Heterogeneous nuclear ribonucleoprotein U-like protein 1	PF13671: AAA domain	IPR013320: Concanavalin A-like lectin/glucanase domain; IPR027417: P-loop containing nucleoside triphosphate hydrolase		G
HC	2A	744943578	751943578	QTL_2A_4	-	0	***	tr|M8BEL6|M8BEL6_AEGTA	Double-strand break repair protein MRE11	PF00149: Calcineurin-like phosphoesterase; PF04152: Mre11 DNA-binding presumed domain	IPR003701: DNA double-strand break repair protein Mre11; IPR004843: Calcineurin-like phosphoesterase domain, ApaH type; IPR007281: Mre11, DNA-binding; IPR029052: Metallo-dependent phosphatase-like	GO:0004519 MF: endonuclease activity;GO:0005634 CC: nucleus;GO:0006302 BP: double-strand break repair;GO:0008408 MF: 3'-5' exonuclease activity;GO:0016787 MF: hydrolase activity;GO:0030145 MF: manganese ion binding;GO:0030870 CC: Mre11 complex	G
HC	2A	744943578	751943578	QTL_2A_4	-	0	***	tr|M8BEL6|M8BEL6_AEGTA	Double-strand break repair protein MRE11	PF00149: Calcineurin-like phosphoesterase; PF04152: Mre11 DNA-binding presumed domain	IPR003701: DNA double-strand break repair protein Mre11; IPR004843: Calcineurin-like phosphoesterase domain, ApaH type; IPR007281: Mre11, DNA-binding; IPR029052: Metallo-dependent phosphatase-like	GO:0004519 MF: endonuclease activity;GO:0005634 CC: nucleus;GO:0006302 BP: double-strand break repair;GO:0008408 MF: 3'-5' exonuclease activity;GO:0016787 MF: hydrolase activity;GO:0030145 MF: manganese ion binding;GO:0030870 CC: Mre11 complex	G
HC	2A	744943578	751943578	QTL_2A_4	-	0	***	tr|M8BEL6|M8BEL6_AEGTA	Double-strand break repair protein MRE11	PF00149: Calcineurin-like phosphoesterase; PF04152: Mre11 DNA-binding presumed domain	IPR003701: DNA double-strand break repair protein Mre11; IPR004843: Calcineurin-like phosphoesterase domain, ApaH type; IPR007281: Mre11, DNA-binding; IPR029052: Metallo-dependent phosphatase-like	GO:0004519 MF: endonuclease activity;GO:0005634 CC: nucleus;GO:0006302 BP: double-strand break repair;GO:0008408 MF: 3'-5' exonuclease activity;GO:0016787 MF: hydrolase activity;GO:0030145 MF: manganese ion binding;GO:0030870 CC: Mre11 complex	G
[truncated: 3,786 more rows]
