# Supplementary material for: Genome wide association study of frost tolerance in wheat
Source: Sci Rep. 2022 Mar 28;12:5275. doi: 10.1038/s41598-022-08706-y (PMC8960795; doi:10.1038/s41598-022-08706-y)
Supplement: Supplementary file 4 — Supplementary ﻿Table S3. [file 41598_2022_8706_MOESM4_ESM.xlsx]

## Sheet: supplementaryTable S3
Supplementary Table S3: List of calculated LD decay for each chromosome, separately.
Chr	LD decay	Number of markers
chr1A	2160880	1167
chr1B	5781275	1320
chr1D	8434298	632
chr2A	1397506	1097
chr2B	3689747	1472
chr2D	5349978	597
chr3A	2863435	893
chr3B	4238305	1082
chr3D	2525632	301
chr4A	2791597	621
chr4B	4240991	584
chr4D	NA	122
chr5A	4875612	1163
chr5B	6520004	1445
chr5D	1889290	381
chr6A	1577749	1009
chr6B	609686	1083
chr6D	1037568	332
chr7A	2538408	1068
chr7B	1759517	927
chr7D	752314	270
all	3377883	17566
