# Supplementary material for: Genome wide association study of frost tolerance in wheat
Source: Sci Rep. 2022 Mar 28;12:5275. doi: 10.1038/s41598-022-08706-y (PMC8960795; doi:10.1038/s41598-022-08706-y)
Supplement: Supplementary file 5 — Supplementary ﻿Table S4. [file 41598_2022_8706_MOESM5_ESM.xlsx]

## Sheet: SupplementaryTable  S4
Supplementary Table S4: Summary of 53 SNP markers significantly associated (LOD≥4) with FroT.
QTL name	Marker	Chr	Pos	p value	LOD
QTL_1A	RAC875_c21842_1647	chr1A	320489869	2.1325e-05	4.67111
QTL_1B_1	RAC875_c44575_396	chr1B	336070184	2.5351e-05	4.596
	wsnp_Ku_c30982_40765341	chr1B	336209964	2.5351e-05	4.596
	Kukri_c30982_1173	chr1B	336210260	2.5351e-05	4.596
	RAC875_rep_c95069_54	chr1B	336647904	2.056e-06	5.68698
QTL_1B_2	Tdurum_contig11877_414	chr1B	373143402	5.2909e-05	4.27647
QTL_2A_1	BobWhite_c9626_246	chr2A	379113997	2.572e-05	4.58973
QTL_2A_2	Tdurum_contig30451_88	chr2A	603687297	1.1259e-09	8.9485
QTL_2A_3	GENE-1275_1179	chr2A	677528807	7.8919e-06	5.10282
	GENE-1275_1292	chr2A	677528912	7.8919e-06	5.10282
QTL_2A_4	GENE-3335_127	chr2A	748443578	4.9739e-05	4.3033
QTL_2B_1	wsnp_CAP7_c2233_1085003	chr2B	190658482	7.6724e-06	5.11507
	wsnp_Ku_c12900_20727771	chr2B	191752438	4.5518e-07	6.34182
	Kukri_c12900_270	chr2B	191752685	7.6724e-06	5.11507
	wsnp_Ex_c38739_46195930	chr2B	192364853	1.2833e-05	4.89167
	wsnp_BF291736B_Ta_1_1	chr2B	192440604	4.5518e-07	6.34182
QTL_2B_2	RAC875_c12968_1526	chr2B	199021553	6.2425e-06	5.20464
	RAC875_c3691_1428	chr2B	200904870	6.2425e-06	5.20464
QTL_2B_3	Excalibur_c15696_737	chr2B	202740571	6.2425e-06	5.20464
QTL_2B_4	RAC875_c57901_354	chr2B	206373684	6.2425e-06	5.20464
QTL_2B_5	CAP12_c733_120	chr2B	581468073	5.6925e-05	4.2447
	Ku_c71357_859	chr2B	581704094	5.6925e-05	4.2447
QTL_2B_6	GENE-0692_249	chr2B	616969385	7.8919e-06	5.10282
QTL_2B_7	Excalibur_c25043_618	chr2B	797330074	1.3266e-05	4.87726
QTL_2D_1	Kukri_rep_c74573_613	chr2D	134792774	1.9199e-05	4.71672
QTL_2D_2	GENE-1100_127	chr2D	494641738	5.6925e-05	4.2447
QTL_3A	RAC875_c15003_377	chr3A	683441459	2.6643e-05	4.57442
QTL_3D	D_contig22919_290	chr3D	394914092	3.716e-05	4.42992
QTL_4A	GENE-2913_148	chr4A	478339274	7.4668e-05	4.12687
QTL_5A_1	BobWhite_c11512_157	chr5A	514092445	4.686e-05	4.3292
	RAC875_c31670_389	chr5A	514094600	4.686e-05	4.3292
	RAC875_c68120_285	chr5A	514153610	4.686e-05	4.3292
QTL_5A_2	BS00085826_51	chr5A	519885504	4.686e-05	4.3292
	Excalibur_c2598_2052	chr5A	519951564	1.654e-05	4.78146
	CBF14_1	chr5A	523017139	6.9247e-05	4.1596
	CBF14_2	chr5A	523017139	6.9247e-05	4.1596
	CBF14_3	chr5A	523017139	6.9247e-05	4.1596
	CBF14_4	chr5A	523017139	6.9247e-05	4.1596
	CBF14_5	chr5A	523017139	6.9247e-05	4.1596
	CBF14_6	chr5A	523017139	6.9247e-05	4.1596
	CBF14_7	chr5A	523017139	6.9247e-05	4.1596
	CBF14_8	chr5A	523017139	6.9247e-05	4.1596
	CBF14_9	chr5A	523017139	6.9247e-05	4.1596
	CBF14_10	chr5A	523017139	6.9247e-05	4.1596
	CBF14_11	chr5A	523017139	6.9247e-05	4.1596
	CBF14_12	chr5A	523017139	6.9247e-05	4.1596
	CBF14_13	chr5A	523017139	6.9247e-05	4.1596
	CBF14_14	chr5A	523017139	6.9247e-05	4.1596
	CBF14_16	chr5A	523017139	8.2955e-05	4.08116
	CBF14_19	chr5A	523017139	6.9247e-05	4.1596
QTL_5B	BS00065313_51	chr5B	489845892	4.686e-05	4.3292
	Kukri_c63163_141	chr5B	490759424	4.686e-05	4.3292
QTL_7D	CAP8_rep_c4857_90	chr7D	488783857	9.9402e-05	4.0026
