# Supplementary material for: Genome wide association study of frost tolerance in wheat
Source: Sci Rep. 2022 Mar 28;12:5275. doi: 10.1038/s41598-022-08706-y (PMC8960795; doi:10.1038/s41598-022-08706-y)
Supplement: Supplementary file 6 — Supplementary ﻿Table S5. [file 41598_2022_8706_MOESM6_ESM.xlsx]

## Sheet: supplementaryTable S5
Supplementary Table S5: List of high and low confidential (HC and LC) genes located within the identified QTL regions and GO terms associated with frost or cold tolerance.
Gene type	Chra	Starta	Enda	QTL	Markera	Identified geneb	Chrb	Startb	Endb		is_repr	AHRD-Quality-Code	Blast-Hit-Accession	Human-Readable-Description	Pfam-IDs-(Description)	Interpro-IDs-(Description)	GO-IDs-(Description)-via-Interpro	Gene-or-TE-TE?-U (via-function)	Pfam-IDs		GO term
HC	1B	369643402	376643402	QTL_1B_2	Tdurum_contig11877_414	TraesCS1B01G208000.1	1B	376071131	376073212	+	1	***	tr|G7KF32|G7KF32_MEDTR	Basic helix loop helix (BHLH) family transcription factor	PF14215: bHLH-MYC and R2R3-MYB transcription factors N-terminal; PF00010: Helix-loop-helix DNA-binding domain	IPR011598: Myc-type, basic helix-loop-helix (bHLH) domain; IPR025610: Transcription factor MYC/MYB N-terminal	GO:0046983 MF: protein dimerization activity	G	PF14215; PF00010	IPR011598; IPR025610	GO:0046983
LC	2A	375613997	382613997	QTL_2A_1	BobWhite_c9626_246	TraesCS2A01G349000LC.1	2A	379598311	379598436	+	1	***	tr|Q5MJ26|Q5MJ26_PENAM	Low temperature and salt responsive protein	PF01679: Proteolipid membrane potential modulator	IPR000612: Proteolipid membrane potential modulator	GO:0016021 CC: integral component of membrane	G	PF01679	IPR000612	GO:0016021
LC	2A	600187297	607187297	QTL_2A_2	Tdurum_contig30451_88	TraesCS2A01G510000LC.1	2A	601386860	601387180	-	1	--*	AT4G36020.2	cold shock domain protein 1				G
HC	2A	674028807	681028807	QTL_2A_3	GENE-1275_1179	TraesCS2A01G427100.1	2A	680086997	680087686	-	1	***	tr|A0A193H6V8|A0A193H6V8_AEGBI	Cold-responsive protein WCOR15				G
HC	2A	674028807	681028807	QTL_2A_3	GENE-1275_1179	TraesCS2A01G427200.1	2A	680096972	680097534	-	1	***	tr|A0A193H6V8|A0A193H6V8_AEGBI	Cold-responsive protein WCOR15				G
LC	2A	674028807	681028807	QTL_2A_3	GENE-1275_1179	TraesCS2A01G580300LC.1	2A	677221448	677222188	-	1	--*	AT1G01260.3	basic helix-loop-helix (bHLH) DNA-binding superfamily protein				G
HC	2A	744943578	751943578	QTL_2A_4	GENE-3335_127	TraesCS2A01G538500.1	2A	751381099	751383827	-	1	*-*	AT1G61660.3	basic helix-loop-helix (bHLH) DNA-binding superfamily protein		IPR011598: Myc-type, basic helix-loop-helix (bHLH) domain	GO:0046983 MF: protein dimerization activity	G		IPR011598	GO:0046983
HC	2A	744943578	751943578	QTL_2A_4	GENE-3335_127	TraesCS2A01G536600.1	2A	750581004	750582032	-	1	***	tr|D8LAK8|D8LAK8_WHEAT	Flowering Locus T-like protein, putative	PF01161: Phosphatidylethanolamine-binding protein	IPR001858: Phosphatidylethanolamine-binding, conserved site; IPR008914: Phosphatidylethanolamine-binding protein		G	PF01161	IPR001858; IPR008914
HC	2A	744943578	751943578	QTL_2A_4	GENE-3335_127	TraesCS2A01G536700.1	2A	750616969	750618584	-	1	***	tr|D8LAK8|D8LAK8_WHEAT	Flowering Locus T-like protein, putative	PF01161: Phosphatidylethanolamine-binding protein	IPR001858: Phosphatidylethanolamine-binding, conserved site; IPR008914: Phosphatidylethanolamine-binding protein		G	PF01161	IPR001858; IPR008914
HC	2A	744943578	751943578	QTL_2A_4	GENE-3335_127	TraesCS2A01G536900.1	2A	750744527	750745555	+	1	***	tr|D8LAK8|D8LAK8_WHEAT	Flowering Locus T-like protein, putative	PF01161: Phosphatidylethanolamine-binding protein	IPR001858: Phosphatidylethanolamine-binding, conserved site; IPR008914: Phosphatidylethanolamine-binding protein		G	PF01161	IPR001858; IPR008914
HC	2B	195521553	202521553	QTL_2B_2	RAC875_c12968_1526	TraesCS2B01G212700.1	2B	197211103	197212413	-	1	*-*	AT2G14760.1	basic helix-loop-helix (bHLH) DNA-binding superfamily protein	PF00010: Helix-loop-helix DNA-binding domain	IPR011598: Myc-type, basic helix-loop-helix (bHLH) domain	GO:0046983 MF: protein dimerization activity	G	PF00010	IPR011598	GO:0046983
HC	2B	613469385	620469385	QTL_2B_5	GENE-0692_249	TraesCS2B01G428000.1	2B	615352721	615356928	+	1	***	tr|S4X1B0|S4X1B0_GLYSO	Basic helix-loop-helix (BHLH) DNA-binding superfamily protein	PF14215: bHLH-MYC and R2R3-MYB transcription factors N-terminal; PF00010: Helix-loop-helix DNA-binding domain	IPR011598: Myc-type, basic helix-loop-helix (bHLH) domain; IPR025610: Transcription factor MYC/MYB N-terminal	GO:0046983 MF: protein dimerization activity	G	PF14215; PF00010	IPR011598; IPR025610	GO:0046983
HC	3A	679941459	686941459	QTL_3A	RAC875_c15003_377	TraesCS3A01G440600.1	3A	683239399	683241535	+	1	*-*	AT2G14760.1	basic helix-loop-helix (bHLH) DNA-binding superfamily protein	PF00010: Helix-loop-helix DNA-binding domain	IPR011598: Myc-type, basic helix-loop-helix (bHLH) domain	GO:0046983 MF: protein dimerization activity	G	PF00010	IPR011598	GO:0046983
HC	3A	679941459	686941459	QTL_3A	RAC875_c15003_377	TraesCS3A01G442600.1	3A	684520348	684522294	-	1	***	tr|A0A0K9NJU2|A0A0K9NJU2_ZOSMR	Basic helix-loop-helix (BHLH) Transcription Factor	PF00010: Helix-loop-helix DNA-binding domain	IPR011598: Myc-type, basic helix-loop-helix (bHLH) domain	GO:0046983 MF: protein dimerization activity	G	PF00010	IPR011598	GO:0046983
HC	3A	679941459	686941459	QTL_3A	RAC875_c15003_377	TraesCS3A01G442200.1	3A	684290165	684292940	-	1	*-*	tr|A0A160SUY1|A0A160SUY1_SOLCI	Transcription factor Inducer of CBF expression 1	PF00010: Helix-loop-helix DNA-binding domain	IPR011598: Myc-type, basic helix-loop-helix (bHLH) domain	GO:0046983 MF: protein dimerization activity	G	PF00010	IPR011598	GO:0046983
HC	5A	510592445	517592445	QTL_5A_1	BobWhite_c11512_157	TraesCS5A01G306200.1	5A	515495124	515496175	-	1	***	tr|A0A072TYH1|A0A072TYH1_MEDTR	Basic helix loop helix (BHLH) family transcription factor	PF00010: Helix-loop-helix DNA-binding domain	IPR011598: Myc-type, basic helix-loop-helix (bHLH) domain	GO:0046983 MF: protein dimerization activity	G	PF00010	IPR011598	GO:0046983
HC	5A	510592445	517592445	QTL_5A_1	BobWhite_c11512_157	TraesCS5A01G306400.1	5A	516664063	516664734	-	1	*-*	tr|Q25BJ5|Q25BJ5_BRAOL	Basic helix-loop-helix (BHLH) family transcription factor	PF00010: Helix-loop-helix DNA-binding domain	IPR011598: Myc-type, basic helix-loop-helix (bHLH) domain	GO:0046983 MF: protein dimerization activity	G	PF00010	IPR011598	GO:0046983
HC	5A	510592445	517592445	QTL_5A_1	BobWhite_c11512_157	TraesCS5A01G306500.1	5A	516814887	516815732	+	1	***	tr|A0A072TYH1|A0A072TYH1_MEDTR	Basic helix loop helix (BHLH) family transcription factor	PF00010: Helix-loop-helix DNA-binding domain	IPR011598: Myc-type, basic helix-loop-helix (bHLH) domain	GO:0046983 MF: protein dimerization activity	G	PF00010	IPR011598	GO:0046983
LC	5A	510592445	517592445	QTL_5A_1	BobWhite_c11512_157	TraesCS5A01G432100LC.1	5A	511357155	511357460	-	1	*-*	tr|M7Y5N7|M7Y5N7_TRIUA	Flowering time control protein FPA				G
LC	5A	510592445	517592445	QTL_5A_1	BobWhite_c11512_157	TraesCS5A01G432700LC.1	5A	511479286	511479757	-	1	*-*	tr|M7Y5N7|M7Y5N7_TRIUA	Flowering time control protein FPA	PF00076: RNA recognition motif. (a.k.a. RRM, RBD, or RNP domain)	IPR000504: RNA recognition motif domain	GO:0003676 MF: nucleic acid binding	G	PF00076	IPR000504	GO:0003676
LC	5A	510592445	517592445	QTL_5A_1	BobWhite_c11512_157	TraesCS5A01G432800LC.1	5A	511508124	511510264	-	1	*-*	tr|A0A1E5VIP5|A0A1E5VIP5_9POAL	Flowering time control protein FPA		IPR000504: RNA recognition motif domain	GO:0003676 MF: nucleic acid binding	G		IPR000504	GO:0003676
LC	5A	510592445	517592445	QTL_5A_1	BobWhite_c11512_157	TraesCS5A01G432800LC.3	5A	511508124	511510264	-	0	*-*	tr|A0A1E5VIP5|A0A1E5VIP5_9POAL	Flowering time control protein FPA		IPR000504: RNA recognition motif domain	GO:0003676 MF: nucleic acid binding	G		IPR000504	GO:0003676
HC	5A	516451564	523451564	QTL_5A_2	Excalibur_c2598_2052	TraesCS5A01G306400.1	5A	516664063	516664734	-	1	*-*	tr|Q25BJ5|Q25BJ5_BRAOL	Basic helix-loop-helix (BHLH) family transcription factor	PF00010: Helix-loop-helix DNA-binding domain	IPR011598: Myc-type, basic helix-loop-helix (bHLH) domain	GO:0046983 MF: protein dimerization activity	G	PF00010	IPR011598	GO:0046983
HC	5A	516451564	523451564	QTL_5A_2	Excalibur_c2598_2052	TraesCS5A01G306500.1	5A	516814887	516815732	+	1	***	tr|A0A072TYH1|A0A072TYH1_MEDTR	Basic helix loop helix (BHLH) family transcription factor	PF00010: Helix-loop-helix DNA-binding domain	IPR011598: Myc-type, basic helix-loop-helix (bHLH) domain	GO:0046983 MF: protein dimerization activity	G	PF00010	IPR011598	GO:0046983
HC	5A	516451564	523451564	QTL_5A_2	Excalibur_c2598_2052	TraesCS5A01G306600.1	5A	518411847	518412674	+	1	***	tr|A0A072TYH1|A0A072TYH1_MEDTR	Basic helix loop helix (BHLH) family transcription factor	PF00010: Helix-loop-helix DNA-binding domain	IPR011598: Myc-type, basic helix-loop-helix (bHLH) domain	GO:0046983 MF: protein dimerization activity	G	PF00010	IPR011598	GO:0046983
HC	5A	516451564	523451564	QTL_5A_2	Excalibur_c2598_2052	TraesCS5A01G306700.1	5A	519693115	519693939	-	1	*-*	tr|A0A072TYH1|A0A072TYH1_MEDTR	Basic helix loop helix (BHLH) family transcription factor	PF00010: Helix-loop-helix DNA-binding domain	IPR011598: Myc-type, basic helix-loop-helix (bHLH) domain	GO:0046983 MF: protein dimerization activity	G	PF00010	IPR011598	GO:0046983
HC	5A	516451564	523451564	QTL_5A_2	Excalibur_c2598_2052	TraesCS5A01G310000.1	5A	522066602	522074556	+	1	***	tr|A0JBY9|A0JBY9_LOLPR	CRT-binding factor	PF00847: AP2 domain	IPR001471: AP2/ERF domain; IPR016177: DNA-binding domain	GO:0003677 MF: DNA binding;GO:0003700 MF: transcription factor activity, sequence-specific DNA binding;GO:0006355 BP: regulation of transcription, DNA-templated	G	PF00847	IPR001471; IPR016177	GO:0003677; GO:0003700; GO:0006355
HC	5A	516451564	523451564	QTL_5A_2	Excalibur_c2598_2052	TraesCS5A01G310100.1	5A	522082625	522083701	+	1	***	tr|A0JBZ5|A0JBZ5_LOLPR	CRT-binding factor	PF00847: AP2 domain	IPR001471: AP2/ERF domain; IPR016177: DNA-binding domain	GO:0003677 MF: DNA binding;GO:0003700 MF: transcription factor activity, sequence-specific DNA binding;GO:0006355 BP: regulation of transcription, DNA-templated	G	PF00847	IPR001471; IPR016177	GO:0003677; GO:0003700; GO:0006355
HC	5A	516451564	523451564	QTL_5A_2	Excalibur_c2598_2052	TraesCS5A01G310200.1	5A	522104268	522104906	+	1	***	tr|A0JBZ8|A0JBZ8_LOLPR	CRT-binding factor	PF00847: AP2 domain	IPR001471: AP2/ERF domain; IPR016177: DNA-binding domain	GO:0003677 MF: DNA binding;GO:0003700 MF: transcription factor activity, sequence-specific DNA binding;GO:0006355 BP: regulation of transcription, DNA-templated	G	PF00847	IPR001471; IPR016177	GO:0003677; GO:0003700; GO:0006355
HC	5A	516451564	523451564	QTL_5A_2	Excalibur_c2598_2052	TraesCS5A01G310400.1	5A	522123926	522124618	-	1	***	tr|A0JBZ5|A0JBZ5_LOLPR	CRT-binding factor	PF00847: AP2 domain	IPR001471: AP2/ERF domain; IPR016177: DNA-binding domain	GO:0003677 MF: DNA binding;GO:0003700 MF: transcription factor activity, sequence-specific DNA binding;GO:0006355 BP: regulation of transcription, DNA-templated	G	PF00847	IPR001471; IPR016177	GO:0003677; GO:0003700; GO:0006355
HC	5A	516451564	523451564	QTL_5A_2	Excalibur_c2598_2052	TraesCS5A01G310500.1	5A	522223600	522224779	+	1	***	tr|A0JBZ5|A0JBZ5_LOLPR	CRT-binding factor	PF00847: AP2 domain	IPR001471: AP2/ERF domain; IPR016177: DNA-binding domain	GO:0003677 MF: DNA binding;GO:0003700 MF: transcription factor activity, sequence-specific DNA binding;GO:0006355 BP: regulation of transcription, DNA-templated	G	PF00847	IPR001471; IPR016177	GO:0003677; GO:0003700; GO:0006355
HC	5A	516451564	523451564	QTL_5A_2	Excalibur_c2598_2052	TraesCS5A01G310600.1	5A	522356976	522357653	-	1	***	tr|A0JBZ5|A0JBZ5_LOLPR	CRT-binding factor	PF00847: AP2 domain	IPR001471: AP2/ERF domain; IPR016177: DNA-binding domain	GO:0003677 MF: DNA binding;GO:0003700 MF: transcription factor activity, sequence-specific DNA binding;GO:0006355 BP: regulation of transcription, DNA-templated	G	PF00847	IPR001471; IPR016177	GO:0003677; GO:0003700; GO:0006355
HC	5A	516451564	523451564	QTL_5A_2	Excalibur_c2598_2052	TraesCS5A01G310700.1	5A	522425183	522426170	+	1	***	tr|A0JBZ5|A0JBZ5_LOLPR	CRT-binding factor	PF00847: AP2 domain	IPR001471: AP2/ERF domain; IPR016177: DNA-binding domain	GO:0003677 MF: DNA binding;GO:0003700 MF: transcription factor activity, sequence-specific DNA binding;GO:0006355 BP: regulation of transcription, DNA-templated	G	PF00847	IPR001471; IPR016177	GO:0003677; GO:0003700; GO:0006355
HC	5A	516451564	523451564	QTL_5A_2	Excalibur_c2598_2052	TraesCS5A01G310800.1	5A	522604914	522611884	-	1	***	tr|A0JBZ5|A0JBZ5_LOLPR	CRT-binding factor	PF00847: AP2 domain	IPR001471: AP2/ERF domain; IPR016177: DNA-binding domain	GO:0003677 MF: DNA binding;GO:0003700 MF: transcription factor activity, sequence-specific DNA binding;GO:0006355 BP: regulation of transcription, DNA-templated	G	PF00847	IPR001471; IPR016177	GO:0003677; GO:0003700; GO:0006355
HC	5A	516451564	523451564	QTL_5A_2	Excalibur_c2598_2052	TraesCS5A01G310900.1	5A	522861018	522861548	-	1	***	tr|A0JBZ2|A0JBZ2_LOLPR	CRT-binding factor		IPR001471: AP2/ERF domain; IPR016177: DNA-binding domain	GO:0003677 MF: DNA binding;GO:0003700 MF: transcription factor activity, sequence-specific DNA binding;GO:0006355 BP: regulation of transcription, DNA-templated	G		IPR001471; IPR016177	GO:0003677; GO:0003700; GO:0006355
HC	5A	516451564	523451564	QTL_5A_2	Excalibur_c2598_2052	TraesCS5A01G311000.1	5A	522868163	522868825	-	1	***	tr|A0JBZ5|A0JBZ5_LOLPR	CRT-binding factor	PF00847: AP2 domain	IPR001471: AP2/ERF domain; IPR016177: DNA-binding domain	GO:0003677 MF: DNA binding;GO:0003700 MF: transcription factor activity, sequence-specific DNA binding;GO:0006355 BP: regulation of transcription, DNA-templated	G	PF00847	IPR001471; IPR016177	GO:0003677; GO:0003700; GO:0006355
HC	5A	516451564	523451564	QTL_5A_2	Excalibur_c2598_2052	TraesCS5A01G311100.1	5A	522882741	522883445	-	1	***	tr|A0JBZ1|A0JBZ1_LOLPR	CRT-binding factor	PF00847: AP2 domain	IPR001471: AP2/ERF domain; IPR016177: DNA-binding domain	GO:0003677 MF: DNA binding;GO:0003700 MF: transcription factor activity, sequence-specific DNA binding;GO:0006355 BP: regulation of transcription, DNA-templated	G	PF00847	IPR001471; IPR016177	GO:0003677; GO:0003700; GO:0006355
LC	5A	516451564	523451564	QTL_5A_2	Excalibur_c2598_2052	TraesCS5A01G444300LC.1	5A	522956132	522956482	-	1	***	tr|A0JBZ1|A0JBZ1_LOLPR	CRT-binding factor				G
HC	5A	516451564	523451564	QTL_5A_2	Excalibur_c2598_2052	TraesCS5A01G311300.1	5A	523015457	523016095	-	1	***	tr|A0JBZ6|A0JBZ6_LOLPR	CRT-binding factor	PF00847: AP2 domain	IPR001471: AP2/ERF domain; IPR016177: DNA-binding domain	GO:0003677 MF: DNA binding;GO:0003700 MF: transcription factor activity, sequence-specific DNA binding;GO:0006355 BP: regulation of transcription, DNA-templated	G	PF00847	IPR001471; IPR016177	GO:0003677; GO:0003700; GO:0006355
HC	5A	516451564	523451564	QTL_5A_2	Excalibur_c2598_2052	TraesCS5A01G311500.1	5A	523136705	523137421	+	1	***	tr|A0JBZ2|A0JBZ2_LOLPR	CRT-binding factor	PF00847: AP2 domain	IPR001471: AP2/ERF domain; IPR016177: DNA-binding domain	GO:0003677 MF: DNA binding;GO:0003700 MF: transcription factor activity, sequence-specific DNA binding;GO:0006355 BP: regulation of transcription, DNA-templated	G	PF00847	IPR001471; IPR016177	GO:0003677; GO:0003700; GO:0006355
HC	5A	516451564	523451564	QTL_5A_2	Excalibur_c2598_2052	TraesCS5A01G311700.1	5A	523450084	523450785	+	1	***	tr|A0JBZ0|A0JBZ0_LOLPR	CRT-binding factor	PF00847: AP2 domain	IPR001471: AP2/ERF domain; IPR016177: DNA-binding domain	GO:0003677 MF: DNA binding;GO:0003700 MF: transcription factor activity, sequence-specific DNA binding;GO:0006355 BP: regulation of transcription, DNA-templated	G	PF00847	IPR001471; IPR016177	GO:0003677; GO:0003700; GO:0006355
HC	5B	486345892	493345892	QTL_5B	BS00065313_51	TraesCS5B01G306600.1	5B	490232175	490235058	-	1	*-*	tr|A0A072TYH1|A0A072TYH1_MEDTR	Basic helix loop helix (BHLH) family transcription factor	PF00010: Helix-loop-helix DNA-binding domain	IPR011598: Myc-type, basic helix-loop-helix (bHLH) domain	GO:0046983 MF: protein dimerization activity	G	PF00010	IPR011598	GO:0046983
HC	5B	486345892	493345892	QTL_5B	BS00065313_51	TraesCS5B01G306800.1	5B	490297337	490298372	-	1	*-*	tr|A0A072TYH1|A0A072TYH1_MEDTR	Basic helix loop helix (BHLH) family transcription factor	PF00010: Helix-loop-helix DNA-binding domain	IPR011598: Myc-type, basic helix-loop-helix (bHLH) domain	GO:0046983 MF: protein dimerization activity	G	PF00010	IPR011598	GO:0046983
HC	5B	486345892	493345892	QTL_5B	BS00065313_51	TraesCS5B01G307000.1	5B	490358507	490359536	-	1	***	tr|A0A072TYH1|A0A072TYH1_MEDTR	Basic helix loop helix (BHLH) family transcription factor	PF00010: Helix-loop-helix DNA-binding domain	IPR011598: Myc-type, basic helix-loop-helix (bHLH) domain	GO:0046983 MF: protein dimerization activity	G	PF00010	IPR011598	GO:0046983
HC	5B	486345892	493345892	QTL_5B	BS00065313_51	TraesCS5B01G307100.1	5B	490611222	490612043	-	1	*-*	tr|A0A072TYH1|A0A072TYH1_MEDTR	Basic helix loop helix (BHLH) family transcription factor	PF00010: Helix-loop-helix DNA-binding domain	IPR011598: Myc-type, basic helix-loop-helix (bHLH) domain	GO:0046983 MF: protein dimerization activity	G	PF00010	IPR011598	GO:0046983
LC	5B	486345892	493345892	QTL_5B	BS00065313_51	TraesCS5B01G477000LC.1	5B	492619443	492620264	+	1	***	tr|A0JBY9|A0JBY9_LOLPR	CRT-binding factor	PF00847: AP2 domain	IPR001471: AP2/ERF domain; IPR016177: DNA-binding domain	GO:0003677 MF: DNA binding;GO:0003700 MF: transcription factor activity, sequence-specific DNA binding;GO:0006355 BP: regulation of transcription, DNA-templated	G	PF00847	IPR001471; IPR016177	GO:0003677; GO:0003700; GO:0006355
HC	5B	486345892	493345892	QTL_5B	BS00065313_51	TraesCS5B01G310800.1	5B	492782354	492783459	+	1	***	tr|A0JBZ5|A0JBZ5_LOLPR	CRT-binding factor	PF00847: AP2 domain	IPR001471: AP2/ERF domain; IPR016177: DNA-binding domain	GO:0003677 MF: DNA binding;GO:0003700 MF: transcription factor activity, sequence-specific DNA binding;GO:0006355 BP: regulation of transcription, DNA-templated	G	PF00847	IPR001471; IPR016177	GO:0003677; GO:0003700; GO:0006355
HC	5B	486345892	493345892	QTL_5B	BS00065313_51	TraesCS5B01G310900.1	5B	492798639	492799411	+	1	***	tr|A0JBZ8|A0JBZ8_LOLPR	CRT-binding factor		IPR001471: AP2/ERF domain; IPR016177: DNA-binding domain	GO:0003677 MF: DNA binding;GO:0003700 MF: transcription factor activity, sequence-specific DNA binding;GO:0006355 BP: regulation of transcription, DNA-templated	G		IPR001471; IPR016177	GO:0003677; GO:0003700; GO:0006355
HC	5B	486345892	493345892	QTL_5B	BS00065313_51	TraesCS5B01G311200.1	5B	492819504	492820187	-	1	***	tr|A0JBZ5|A0JBZ5_LOLPR	CRT-binding factor	PF00847: AP2 domain	IPR001471: AP2/ERF domain; IPR016177: DNA-binding domain	GO:0003677 MF: DNA binding;GO:0003700 MF: transcription factor activity, sequence-specific DNA binding;GO:0006355 BP: regulation of transcription, DNA-templated	G	PF00847	IPR001471; IPR016177	GO:0003677; GO:0003700; GO:0006355
HC	5B	486345892	493345892	QTL_5B	BS00065313_51	TraesCS5B01G311300.1	5B	493085846	493086718	-	1	*-*	tr|A0JBZ6|A0JBZ6_LOLPR	CRT-binding factor	PF00847: AP2 domain	IPR001471: AP2/ERF domain; IPR016177: DNA-binding domain	GO:0003677 MF: DNA binding;GO:0003700 MF: transcription factor activity, sequence-specific DNA binding;GO:0006355 BP: regulation of transcription, DNA-templated	G	PF00847	IPR001471; IPR016177	GO:0003677; GO:0003700; GO:0006355
LC	5B	486345892	493345892	QTL_5B	BS00065313_51	TraesCS5B01G477400LC.1	5B	493124625	493125395	-	1	***	tr|A0JBZ6|A0JBZ6_LOLPR	CRT-binding factor	PF00847: AP2 domain	IPR001471: AP2/ERF domain; IPR016177: DNA-binding domain	GO:0003677 MF: DNA binding;GO:0003700 MF: transcription factor activity, sequence-specific DNA binding;GO:0006355 BP: regulation of transcription, DNA-templated	G	PF00847	IPR001471; IPR016177	GO:0003677; GO:0003700; GO:0006355
HC	5B	486345892	493345892	QTL_5B	BS00065313_51	TraesCS5B01G311400.1	5B	493140553	493141222	+	1	***	tr|A0JBZ5|A0JBZ5_LOLPR	CRT-binding factor	PF00847: AP2 domain	IPR001471: AP2/ERF domain; IPR016177: DNA-binding domain	GO:0003677 MF: DNA binding;GO:0003700 MF: transcription factor activity, sequence-specific DNA binding;GO:0006355 BP: regulation of transcription, DNA-templated	G	PF00847	IPR001471; IPR016177	GO:0003677; GO:0003700; GO:0006355
HC	5B	486345892	493345892	QTL_5B	BS00065313_51	TraesCS5B01G311500.1	5B	493159433	493160071	-	1	***	tr|A0JBZ5|A0JBZ5_LOLPR	CRT-binding factor	PF00847: AP2 domain	IPR001471: AP2/ERF domain; IPR016177: DNA-binding domain	GO:0003677 MF: DNA binding;GO:0003700 MF: transcription factor activity, sequence-specific DNA binding;GO:0006355 BP: regulation of transcription, DNA-templated	G	PF00847	IPR001471; IPR016177	GO:0003677; GO:0003700; GO:0006355
HC	5B	486345892	493345892	QTL_5B	BS00065313_51	TraesCS5B01G311600.1	5B	493168447	493169055	-	1	***	tr|A0JBZ5|A0JBZ5_LOLPR	CRT-binding factor	PF00847: AP2 domain	IPR001471: AP2/ERF domain; IPR016177: DNA-binding domain	GO:0003677 MF: DNA binding;GO:0003700 MF: transcription factor activity, sequence-specific DNA binding;GO:0006355 BP: regulation of transcription, DNA-templated	G	PF00847	IPR001471; IPR016177	GO:0003677; GO:0003700; GO:0006355
HC	5B	486345892	493345892	QTL_5B	BS00065313_51	TraesCS5B01G311700.1	5B	493285961	493286623	-	1	***	tr|A0JBZ5|A0JBZ5_LOLPR	CRT-binding factor	PF00847: AP2 domain	IPR001471: AP2/ERF domain; IPR016177: DNA-binding domain	GO:0003677 MF: DNA binding;GO:0003700 MF: transcription factor activity, sequence-specific DNA binding;GO:0006355 BP: regulation of transcription, DNA-templated	G	PF00847	IPR001471; IPR016177	GO:0003677; GO:0003700; GO:0006355
a: chromosome (Chr), start and end of QTL interval and name of detected significant marker, respectively
b: identified gene, chromosome (Chr), start and end for identified gene, respectively
