# Supplementary material for: Genome wide association study of frost tolerance in wheat
Source: Sci Rep. 2022 Mar 28;12:5275. doi: 10.1038/s41598-022-08706-y (PMC8960795; doi:10.1038/s41598-022-08706-y)
Supplement: Supplementary file 7 — Supplementary ﻿Table S6. [file 41598_2022_8706_MOESM7_ESM.xlsx]

## Sheet: supplementaryTable S6
Supplementary Table S6: List of candidate genes identified via BLASTn.
Chra	QTL	Identified gene	Identified gene name via BLASTn	Sequence ID	Score	E value	Identity [%]	Species	Alternative gene ID
CBFs
5A	QTL_5A_2	TraesCS5A01G310000.1	CBFIIId-17.1	JN987205.1	1222	0	99.65	Triticum aestivum	CBF-A17
5A	QTL_5A_2	TraesCS5A01G310100.1	CBFIVd-9.1	JN987225.1	1628	0	100	Triticum aestivum	CBF-A9
5A	QTL_5A_2	TraesCS5A01G310200.1	CBFIVd-26.2	JN987224.1	1181	0	100	Triticum aestivum	CBF-A26
5A	QTL_5A_2	TraesCS5A01G310400.1	CBFIVa-25.3	JN987222.1	1280	0	100	Triticum aestivum	CBF-A25
5A	QTL_5A_2	TraesCS5A01G310500.1	CBFIVd-A22	EF028785.1	1898	0	100	Triticum aestivum	CBF-A22
5A	QTL_5A_2	TraesCS5A01G310600.1	CBFIVa-A2	EF028769.1	1253	0	100	Triticum aestivum	CBF-A2
5A	QTL_5A_2	TraesCS5A01G310700.1	CBFIVd-4.1	EF028780.1	1225	0	99.7	Triticum aestivum	CBF-A4
5A	QTL_5A_2	TraesCS5A01G310800.1	no perfect match
5A	QTL_5A_2	TraesCS5A01G310900.1	putative CBF transcription activator	JF758493.1	970	0	99.62	Triticum aestivum
5A	QTL_5A_2	TraesCS5A01G311000.1	putative CBF transcription activator	JF758493.1	1225	0	100	Triticum aestivum
5A	QTL_5A_2	TraesCS5A01G311100.1	CBFIIID-A19	JN987220.1	1303	0	100	Triticum aestivum	CBF-A19
5A	QTL_5A_2	TraesCS5A01G444300LC.1	CBFIIId-24.2	JN987221.1	649	0	100	Triticum aestivum	CBF-A24
5A	QTL_5A_2	TraesCS5A01G311300.1	CBF-A14	HG939430.1	1181	0	100	Triticum aestivum	CBF-A14
5A	QTL_5A_2	TraesCS5A01G311500.1	CBF-A15	HG530931.1	1325	0	100	Triticum aestivum	CBF-A15
5A	QTL_5A_2	TraesCS5A01G311700.1	CBFIIId-16.1	JN987219.1	1297	0	100	Triticum aestivum	CBF-A16
5B	QTL_5B	TraesCS5B01G477000LC.1	dehydration-responsive element-binding protein 1H-like	XM_037582309.1	1487	0	99.27	Triticum dicoccoides
5B	QTL_5B	TraesCS5B01G310800.1	CBFIVd-B9	EF028783.1	1796	0	99.88	Triticum aestivum	CBF-B9
5B	QTL_5B	TraesCS5B01G310900.1	no perfect match
5B	QTL_5B	TraesCS5B01G311200.1	dehydration-responsive element-binding protein	XM_037582310.1	1264	0	100	Triticum dicoccoides
5B	QTL_5B	TraesCS5B01G311300.1	CBFIVd-B22b	EF028786.1	2043	0	99.77	Triticum aestivum	CBF-B22
5B	QTL_5B	TraesCS5B01G477400LC.1	no perfect match
5B	QTL_5B	TraesCS5B01G311400.1	CBFIVd-B4	EF028781.1	1219	0	99.55	Triticum aestivum	CBF-B4
5B	QTL_5B	TraesCS5B01G311500.1	CBFIVb-B20	EF028773.1	1170	0	99.69	Triticum aestivum	CBF-B20
5B	QTL_5B	TraesCS5B01G311600.1	CBFIVb-21.1	EF028775.1	1125	0	100	Triticum aestivum	CBF-B21
5B	QTL_5B	TraesCS5B01G311700.1	no perfect match
bHLHs
1B	QTL_1B_2	TraesCS1B01G208000.1	transcription factor MYC2-like	XM_037609522.1	3834	0	99.9	Triticum dicoccoides
2A	QTL_2A_3	TraesCS2A01G580300LC.1	no perfect match
2A	QTL_2A_4	TraesCS2A01G538500.1	transcription factor bHLH112-like	XM_037623958.1	2410	0	99.77	Triticum dicoccoides
2B	QTL_2B_2	TraesCS2B01G212700.1	RSL4 (ROOT HAIR DEFECTIVE6‐LIKE 4)	KX619658.1	1679	0	100	Triticum aestivum
2B	QTL_2B_5	TraesCS2B01G428000.1	anthocyanin regulatory R-S protein-like	XM_037630862.1	3142	0	99.59	Triticum dicoccoides
3A	QTL_3A	TraesCS3A01G440600.1	no perfect match
3A	QTL_3A	TraesCS3A01G442600.1	transcription factor bHLH35-like	XM_037552170.1	1618	0	99.89	Triticum dicoccoides
5A	QTL_5A_1	TraesCS5A01G306200.1	transcription factor MYC2-like	XM_037575385.1	1535	0	99.64	Triticum dicoccoides
5A	QTL_5A_1	TraesCS5A01G306400.1	no perfect match
5A	QTL_5A_1	TraesCS5A01G306500.1	transcription factor bHLH14-like	XM_037576994.1	1535	0	99.41	Triticum dicoccoides
5A	QTL_5A_2	TraesCS5A01G306600.1	transcription factor MYC2-like	XM_037575386.1	1502	0	99.4	Triticum dicoccoides
5A	QTL_5A_2	TraesCS5A01G306700.1	transcription factor MYC2-like	XM_037576997.1	1524	0	100	Triticum dicoccoides
5B	QTL_5B	TraesCS5B01G306600.1	transcription factor bHLH14-like	XM_037582295.1	1513	0	99.88	Triticum dicoccoides
5B	QTL_5B	TraesCS5B01G306800.1	transcription factor bHLH14-like	XM_037582297.1	1557	0	100	Triticum dicoccoides
5B	QTL_5B	TraesCS5B01G307000.1	transcription factor MYC2-like	XM_037582298.1	1552	0	100	Triticum dicoccoides
5B	QTL_5B	TraesCS5B01G307100.1	transcription factor MYC2-like	XM_037582299.1	1519	0	100	Triticum dicoccoides
further genes
1B	QTL_1B_2	TraesCS1B01G395300LC.1	no perfect match
2A	QTL_2A_3	TraesCS2A01G427300.1	late embryogenesis abundant protein 19-like	XM_037618661.1	2143	0	100	Triticum dicoccoides
2B	QTL_2B_1	TraesCS2B01G287000LC.1	no perfect match						MYB8
5A	QTL_5A_1	TraesCS5A01G438000LC.1	no perfect match						REM18
5A	QTL_5A_2	TraesCS5A01G444900LC.1	no perfect match
